# Supplementary material
Source: bioRxiv or medRxiv preprint supplement (https://www.biorxiv.org/highwire/filestream/75444/field_highwire_adjunct_files/0/246124-1.pdf)

# SUPPLEMENTARY MATERIALS

## Supplementary Methods

### Synthesis of H<sub>2</sub>N-P2-P1-ACC fluorescent substrates

To 1g (0.74mmol) of Fmoc-protected Rink Amide resin (Iris Biotech GmbH, Germany) was added to a glass solid-phase reaction vessel. Next, 5 mL of dichloromethane (DCM) was added and the resin was gently stirred once per 10 minutes for 1 h, then filtered and washed three times with *N,N*-dimethylformamide (DMF). Fmoc protecting group was removed using 20% piperidine in DMF (in three cycles: 5 min, 5 min, and 25 min), filtered each time and rinsed with DMF (six times). A ninhydrin test was performed to confirm resin Fmoc de-protection. Next, 2.5 eq of Fmoc-ACC-OH (1.85 mmol, 816 mg) was pre-activated with 2.5 eq of HOBt (1.85 mmol, 278 mg) and 2.5 eq of DICl (1.85 mmol, 242 $\mu$ l) in DMF for 3 min and the mixture was added to the resin. Reaction was gently agitated for 24 h at room temperature. Next, resin was washed five times with DMF and reaction was repeated using 1.5 eq of above reagents to improve the yield of ACC coupling. After 24h of gentle stirring, resin was washed with DMF and Fmoc protecting group was removed from ACC with the use of 20% piperidine in DMF (5 min, 5 min, and 25 min), filtered and washed with DMF (six times). Resin was subsequently washed with DCM (3 times) and MeOH (3 times), dried over P<sub>2</sub>O<sub>5</sub> and divided into eight equal portions (0.09 mmol per portion). Each portion of the H<sub>2</sub>N-ACC-resin was placed in to the wells of semiautomatic FlexChem solid phase synthesizer cartridge (SciGene, USA). Then, to each well 2.5 eq of Fmoc-P1-OH (0.225 mmol) with 2.5 eq of HATU (0.225 mmol, 86 g), and 2.5 eq of 2,4,6-collidine (0.225 mmol, 30  $\mu$ l) in DMF were added. Reactions were carried out for 24 h with gentle agitation of reaction cartridge, followed by washing the resin five times with DMF. P1 coupling reactions were repeated using 1.5 eq of above reagents. P1 Fmoc protecting group was removed from each substrate using 20% piperidine in DMF (5 min, 5 min, and 25 min), and the resin was washed six times with DMF. A ninhydrin test was performed to confirm P1 Fmoc de-protection. Next, 2.5 eq Fmoc-P2-OH (0.225 mmol) was pre-activated with 2.5 eq of HOBt (0.225 mmol, 34 mg) and 2.5 eq of DICl (0.225 mmol, 30 $\mu$ l) in DMF, added to the cartridge wells containing 1 eq of H<sub>2</sub>N-P1-ACC-resin and gentle agitated for 3 hours. A ninhydrin test confirmed the complete P2 coupling. Next, resin was filtered and washed with DMF (six times). Fmoc-protecting group was removed using 20% piperidine in DMF (5 min, 5 min, and 25 min), followed by washing the resin six time with DMF and performing a ninhydrin test. Next, the HN2-P2-P1-ACC-resin product was washed with DMF (six times), DCM (three times) and MeOH (three times), dried over P<sub>2</sub>O<sub>5</sub> and cleaved from the resin with a mixture of TFA : TIPS : H<sub>2</sub>O (v/v/v 95/2.5/2.5). The crude product was purified by HPLC (Waters system), lyophilized and dissolved in DMSO to a final concentration of 20mM. Each substrate was analyzed by analytical HPLC and High Resolution Mass Spectrometry.

## Synthesis of vinyl sulfone inhibitors.

### *tert*-Butyl (S)-1-(N-methoxy-N-methylcarbamoyl)pent-4-ynylcarbamate Lm1msed13

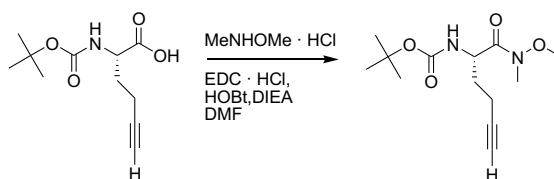

To a solution of (S)-2-(Boc-amino)-5-hexynoic acid (0.6 g, 2.64 mmol) in dry DMF (14 mL) at 0 °C was added EDC (607 mg, 3.17 mmol), HOBT (427 mg, 3.17 mmol), N,O-dimethylhydroxylamine hydrochloride (308 mg, 3.17 mmol) and DIPEA (0.7 mL, 7.92 mmol). The reaction was stirred at rt for 12 h. The resulting solution was evaporated in vacuo to give a light yellow oil, which was diluted with aqueous NH<sub>4</sub>Cl (10 wt%) and extracted with EtOAc (3 x 50 mL). The combined organic extracts were dried over Na<sub>2</sub>SO<sub>4</sub>, filtered and concentrated in vacuo. Purification by flash column chromatography (silica gel; using 20% EtOAc in hexanes) provided the protected product *tert*-butyl (S)-1-(N-methoxy-N-methylcarbamoyl)pent-4-ynylcarbamate as a white foam (0.64 g, 2.37 mmol, 90%).

<sup>1</sup>H NMR (DCCl<sub>3</sub> δ): 1.41 (s, 9H) 1.72 (td, J = 20.9, 6.9 Hz, 2H), 1.96 (t, J = 2.6 Hz, 1H), 2.27 (dt, J = 7.2, 7.0, 2.5 Hz, 2H), 3.19 (s, 3H), 3.76 (s, 3H), 4.73 (dt, J = 8.7, 4.4 Hz, 1H), 5.21 (d, J = 8.1 Hz, 1H).

<sup>13</sup>C NMR (DCCl<sub>3</sub> δ): 15.0 (CH<sub>2</sub>), 28.3 (CH<sub>3</sub>), 32.0 (CH<sub>2</sub>), 32.2 (CH<sub>3</sub>), 49.8 (CH), 61.6 (CH<sub>3</sub>), 68.7 (CH), 79.7 (C), 83.2 (C), 155.4 (C), 172.4 (C).

ESI-MS: [M+H]<sup>+</sup> calcd. for C<sub>13</sub>H<sub>22</sub>N<sub>2</sub>O<sub>4</sub>Na = 293.1772 found 293.1478. (M.W. 270.3248)

### *tert*-Butyl (S)-1-formylpent-4-ynylcarbamate Lm1msed14

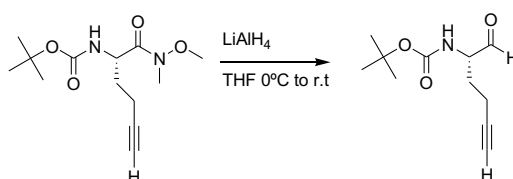

To a solution of *tert*-Butyl (S)-1-(N-methoxy-N-methylcarbamoyl)pent-4-ynylcarbamate (0.62 g, 2.3 mmol) in dry THF (23 mL) at 0 °C was added LiAlH<sub>4</sub> (0.1 g, 2.76 mmol) over 10 min, with vigorous stirring. The mixture was stirred for an additional 20 min at 0 °C, whereupon cold water was carefully added until effervescence ceased. A cold HCl solution (1 M) was added to break up the gelatinous emulsion until pH 6~7. Upon dilution with H<sub>2</sub>O (150 mL) and extraction with EtOAc (3 x 75 mL), the combined organic extracts dried over Na<sub>2</sub>SO<sub>4</sub>, filtered and concentrated in vacuo. Purification by flash column chromatography (silica gel; using 30% EtOAc in hexanes) provided the product *tert*-Butyl (S)-1-formylpent-4-ynylcarbamate as a white solid (0.44 g, 2.08, 90%).

$^1\text{H NMR}$  ( $\text{DCCl}_3$ ,  $\delta$ ): 1.44 (s, 9H), 1.85 (dt,  $J = 14.2, 14.0, 7.1$  Hz, 2H), 2.01 (t,  $J = 2.6$  Hz, 1H), 2.32 (dt,  $J = 6.7, 2.5$  Hz, 2H), 4.29 (bs, 1H), 5.21 (bs, 1H), 9.64 (s, 1H).

$^{13}\text{C NMR}$  ( $\text{DCCl}_3$ ,  $\delta$ ): 14.5 ( $\text{CH}_2$ ), 27.9 ( $\text{CH}_2$ ), 28.1 ( $\text{CH}_3$ ), 59.0 (CH), 70.0 (CH), 80.2 (C), 82.5 (C), 155.3 (C), 199.0 (CH)

**ESI-MS:**  $[\text{M}+\text{H}]^+$  calcd. for  $\text{C}_{11}\text{H}_{17}\text{NO}_3\text{Na} = 234.1101$  found 234.1105. (M.W. 211.2576)

### ***tert*-Butyl (S,E)-1-(phenylsulfonyl)hept-1-en-6-yn-3-ylcarbamate**

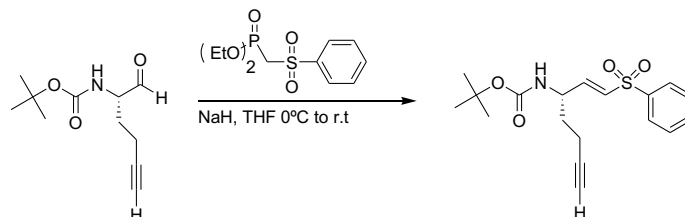

To a cooled ( $0^\circ\text{C}$ ) suspension of hexane-washed NaH (60% in mineral oil; 0.1 g, 2.38 mmol) in dry THF (10 mL) was added drop-wise diethyl[benzenesulfonyl]methylphosphonate (0.64 g, 2.18 mmol) in dry THF (10 mL) via syringe. The mixture was stirred for an additional 30 min at  $0^\circ\text{C}$  and *tert*-butyl (S)-1-formylpent-4-ynylcarbamate (0.42 g, 2.0 mmol) in dry THF (10 mL) was added drop-wise. The stirring was continued for 1 h, before a cold 10 wt%  $\text{NH}_4\text{Cl}$  solution was added to break up the gelatinous emulsion until pH 6~7. The solution was concentrated in vacuo, diluted with water (100 mL) and extracted with EtOAc (3 x 75 mL). The combined organic extracts were dried over  $\text{Na}_2\text{SO}_4$ , filtered and concentrated under vacuum. Purification by flash column chromatography (silica gel; using 40% EtOAc in hexanes) provided the product *tert*-butyl (S,E)-1-(phenylsulfonyl)hept-1-en-6-yn-3-ylcarbamate as a white foam (0.46 g, 1.30 mmol, 65%).

$^1\text{H NMR}$  ( $\text{DCCl}_3$ ,  $\delta$ ): 1.37 (s, 9H), 1.80 (ddd,  $J = 21.5, 13.8, 6.9$  Hz, 2H), 2.00 (t,  $J = 2.6$  Hz, 1H), 2.27 (dt,  $J = 6.9, 2.5$  Hz, 2H), 4.47 (bs, 1H), 4.69 (d,  $J = 8.6$  Hz, 1H), 6.46 (dd,  $J = 15.0, 1.5$  Hz, 1H), 6.89 (dd,  $J = 15.0, 5.0$  Hz, 1H), 7.50-7.61 (m, 3H) 7.87 (d,  $J = 7.0$  Hz, 2H).

$^{13}\text{C NMR}$  ( $\text{DCCl}_3$ ,  $\delta$ ): 15.1 ( $\text{CH}_2$ ), 28.2 ( $\text{CH}_3$ ), 32.7 ( $\text{CH}_2$ ), 50.4 (CH), 69.9 (CH), 80.2 (C), 82.4 (C), 127.6 (CH), 129.2 (CH), 130.9 (CH), 133.4 (CH), 140.1 (C), 145.5 (CH), 154.8 (C).

**ESI-MS:**  $[\text{M}+\text{H}]^+$  calcd. for  $\text{C}_{18}\text{H}_{23}\text{NO}_4\text{Na} = 372.1240$  found 372.1254. (M.W. 349.4445)

### **(S,E)-1-(phenylsulfonyl)hept-1-en-6-yn-3-amine**

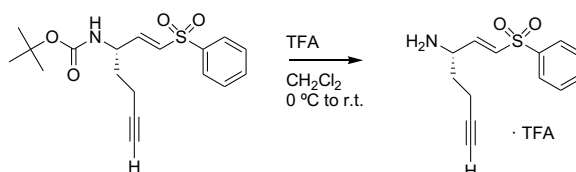

$^1\text{H NMR}$  (*MeOD-d<sub>4</sub>*  $\delta$ ): 1.90-2.07 (m, 2H), 2.20-2.31 (m, 2H), 2.40 (t,  $J = 2.6$  Hz, 1H), 4.14 (dt,  $J = 7.9, 6.0$  Hz, 1H), 6.88 (dd,  $J = 15.2, 7.4$  Hz, 1H), 7.02 (d,  $J = 15.2$  Hz, 1H), 7.61-7.74 (m, 3H), 7.92-7.95 (m, 2H).

$^{13}\text{C NMR}$  (*MeOD-d<sub>4</sub>*  $\delta$ ): 15.3 (CH<sub>2</sub>), 32.1 (CH<sub>2</sub>), 51.6 (CH), 72.0 (CH), 82.1 (C), 129.1 (CH), 130.8 (CH), 135.3 (CH), 137.1 (CH), 139.9 (CH), 140.8 (C), 162 (q, C, TFA).

**ESI-MS:**  $[\text{M}+\text{H}]^+$  calcd. for C<sub>13</sub>H<sub>16</sub>NO<sub>2</sub>S = 250.0896 found 250.0890. (M.W. 363.3520)

**(2S)-2-Amino-3-(1H-indol-3-yl)-N-((S,E)-1-(phenylsulfonyl)hept-1-en-6-yn-3-yl)propanamide (Trp-hPG-VS)**

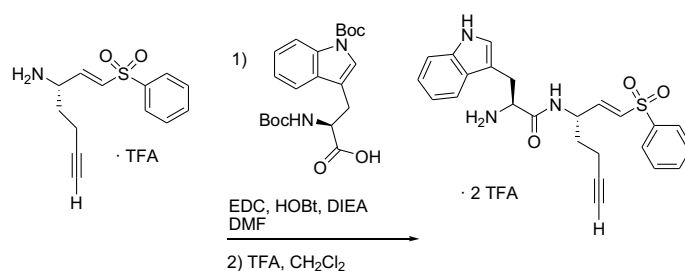

$^1\text{H NMR}$  (*MeOD<sub>4</sub>*  $\delta$ ): 1.73-1.86 (m, 2H), 2.21 (dt,  $J = 7.2, 2.6$  Hz, 2H), 2.28 (bs, 1H), 3.20-3.35 (m, 2H, partial overlapping with MeOD signal), 4.12 (dd,  $J = 7.80, 7.15$  Hz, 1H), 4.70 (dd,  $J = 13.3, 4.8$  Hz, 1H), 6.15 (dd,  $J = 15.1, 1.5$  Hz, 1H), 6.78 (dd,  $J = 15.1, 5.4$  Hz, 1H), 7.05-7.08 (m, 1H), 7.14 (bs, 2H), 7.43 (d,  $J = 8.2$  Hz, 1H), 7.57-7.64 (m, 3H), 7.67-7.70 (m, 1H), 7.84 (dd,  $J = 8.4, 1.2$  Hz, 2H).

$^{13}\text{C NMR}$  (*MeOD<sub>4</sub>*  $\delta$ ): 15.2 (CH<sub>2</sub>), 28.7 (CH<sub>2</sub>), 32.6 (CH<sub>2</sub>), 50.2 (CH), 55.1 (CH), 70.7 (CH), 83.3 (C), 108.0 (C), 122.4 (CH), 118.8 (CH), 120.1 (CH), 122.7 (CH), 125.2 (CH), 128.3 (C), 128.5 (CH), 130.3 (CH), 132.2 (CH), 134.6 (CH), 138.2 (C), 141.6 (C), 145.9 (CH), 169.9 (C).

**ESI-MS:**  $[\text{M}+\text{H}]^+$  calcd. for C<sub>24</sub>H<sub>26</sub>N<sub>3</sub>O<sub>3</sub>S = 436.1689 found 436.1690. (M.W. 663.5853)

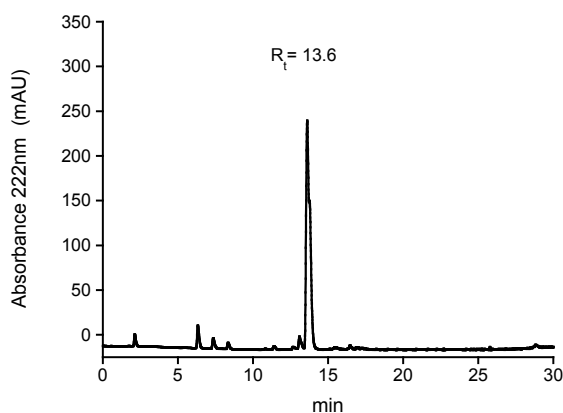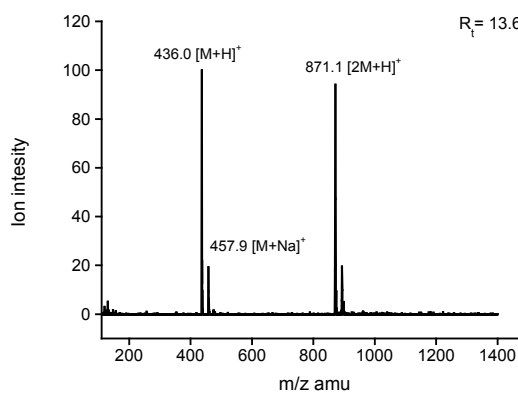

**(2S)-N-((S,E)-5-phenyl-1-(phenylsulfonyl)pent-1-en-3-yl)piperidine-2-carboxamide Lm1msed42 (hPro-hPhe-VS)**

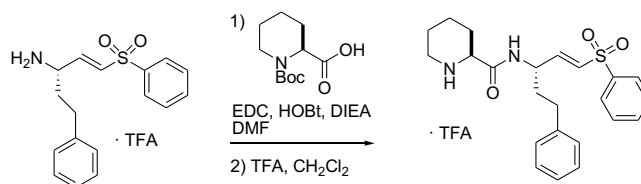

To a solution of (S)-N-Boc-Piperidine-2-carboxylic acid (211 mg, 0.92 mmol) in DMF (3 mL) was added EDC/HCl (177 mg, 0.92 mmol), HOBT (125 mg, 0.92 mmol) and DIEA (0.6 mL, 3.1 mmol). After 10 min, (S)-3-benzenesulfonyl-1-phenethylallylamine trifluoroacetate (TFA·HphVSPH, X) (320 mg, 0.77 mmol) in DMF (3 mL) was added drop-wise. The reaction was stirred at rt for 12 h. The resulting solution was evaporated in vacuo to give a light yellow oil, which was diluted with aqueous NH<sub>4</sub>Cl (10 wt%) and extracted with EtOAc (3 x 50 mL). The combined organic extracts were dried over Na<sub>2</sub>SO<sub>4</sub>, filtered and concentrated in vacuo. Purification by flash column chromatography (silica gel; using 40% EtOAc in hexanes) provided the protected product as a white foam.

To a solution of this intermediate in CH<sub>2</sub>Cl<sub>2</sub> (5 mL) at 0 °C was added trifluoroacetic acid (5 mL). The solution was stirred at room temperature overnight, then evaporated to dryness in vacuo and finally freeze-dried yielding a white solid that was identified as the trifluoroacetic salt of the desired product (216 mg, 0.41 mmol, 52%).

**<sup>1</sup>H NMR (MeOD-d<sub>4</sub> δ):** 1.59-1.69 (m, 3H), 1.84-1.99 (m, 4H), 2.19 (d, *J* = 9.5 Hz, 1H), 2.57-2.67 (m, 2H), 3.01 (t, *J* = 10.9 Hz, 1H), 3.38 (d, *J* = 12.6 Hz, 1H), 3.82 (dd, *J* = 11.1, 2.8 Hz, 1H), 4.57 (dd, *J* = 13.9, 5.7 Hz, 1H), 6.56 (d, *J* = 15.2 Hz, 1H), 6.91 (dd, *J* = 15.1, 5.9 Hz, 1H), 7.14-7.18 (m, 3H), 7.22-7.27 (m, 2H), 7.58-7.62 (m, 2H), 7.67-7.71 (m, 1H), 7.88 (d, *J* = 7.6 Hz, 2H).

**<sup>13</sup>C NMR (MeOD-d<sub>4</sub> δ):** 22.8 (CH<sub>2</sub>), 23.1 (CH<sub>2</sub>), 28.7 (CH<sub>2</sub>), 33.0 (CH<sub>2</sub>), 36.2 (CH<sub>2</sub>), 44.9 (CH<sub>2</sub>), 50.8 (CH), 59.0 (CH), 127.3 (CH), 128.7 (CH), 129.5 (CH), 129.6 (CH), 130.7 (CH), 132.4 (CH), 134.9 (CH), 141.7 (C), 141.9 (C), 146.8 (CH), 169.8 (C).

**ESI-MS:** [M+H]<sup>+</sup> calcd. for C<sub>23</sub>H<sub>29</sub>N<sub>2</sub>O<sub>3</sub>S = 413.1893 found 413.1896. (M.W. 526.5684)

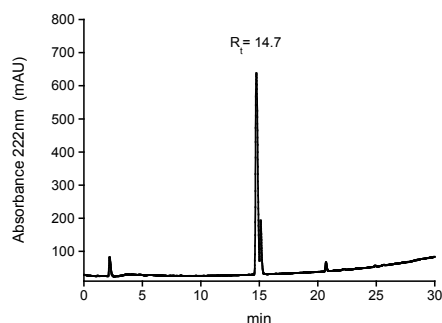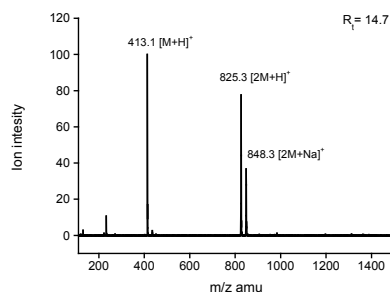

**(2S)-2-amino-2-(2,3-dihydro-1H-inden-2-yl)-N-((S,E)-5-phenyl-1-(phenylsulfonyl)pent-1-en-3-yl)acetamide Lm1msed44 (Igl-hPhe-VS)**

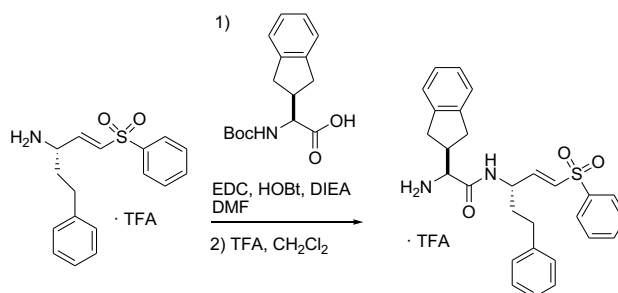

**<sup>1</sup>H NMR (MeOD-*d*<sub>4</sub> δ):** 1.96 (td, *J* = 15.3, 7.5 Hz, 2H), 2.66 (dd, *J* = 15.6, 8.3 Hz, 2H), 2.88 (t, *J* = 5.60 Hz, 4H), 3.00-3.06 (m, 1H), 3.95 (dd, *J* = 5.4, 1.2 Hz, 1H), 4.60 (q, *J* = 6.8 Hz, 1H), 6.64 (d, *J* = 15.2 Hz, 1H), 6.89 (dd, *J* = 15.1, 6.6 Hz, 1H), 7.16 (bs, 7H), 7.24 (d, *J* = 7.1 Hz, 2H), 7.54-7.58 (m, 2H), 7.62-7.68 (m, 1H), 7.85 (d, *J* = 7.68 Hz, 2H).

**<sup>13</sup>C NMR (MeOD-*d*<sub>4</sub> δ):** 32.9 (CH<sub>2</sub>), 36.2 (CH<sub>2</sub>), 36.3 (CH<sub>2</sub>), 36.4 (CH<sub>2</sub>), 43.1 (CH), 51.2 (CH), 57.8 (CH), 125.5 (CH), 127.3 (CH), 128.0 (CH), 128.7 (CH), 129.5 (CH), 129.6 (CH), 130.7 (CH), 133.2 (CH), 134.9 (CH), 141.6 (C), 142.0 (C), 142.1 (C), 142.2 (C), 146.0 (CH), 169.2 (C).

**ESI-MS:** [M+H]<sup>+</sup> calcd. for C<sub>28</sub>H<sub>31</sub>N<sub>2</sub>O<sub>3</sub>S = 475.2050 found 475.2049. (M.W. 588.6377)

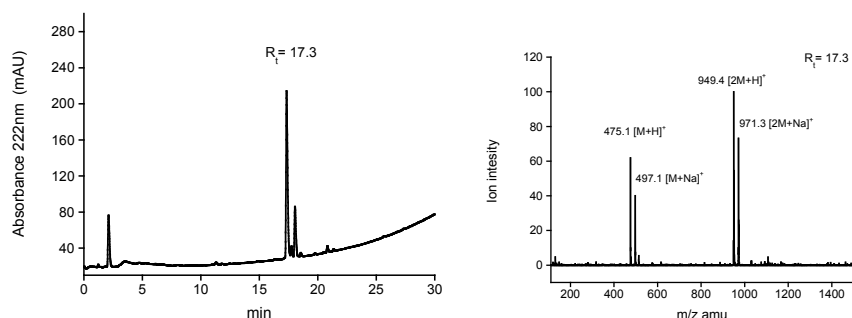

***tert*-Butyl (S)-5-(benzyloxy)-1-formylpentylcarbamate Lm1msed46**

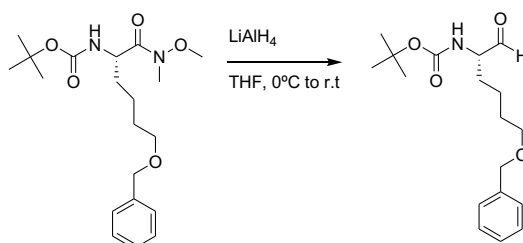

To a solution of *tert*-butyl (S)-1-(N-methoxy-N-methylcarbamoyl)-5-(benzyloxy) pentylcarbamate (2.2 g, 5.8 mmol) in dry THF (50 mL) at 0 °C was added LiAlH<sub>4</sub> (0.26 g, 7 mmol) over 10 min, with vigorous stirring. The mixture was stirred for an additional 20 min at 0 °C, whereupon cold water was carefully added until effervescence ceased. A cold HCl solution (1 M) was added to break up

the gelatinous emulsion until pH 6~7. Upon dilution with H<sub>2</sub>O (150 mL) and extraction with EtOAc (3 x 75 mL), the combined organic extracts dried over Na<sub>2</sub>SO<sub>4</sub>, filtered and concentrated in vacuo. Purification by flash column chromatography (silica gel; using 40% EtOAc in hexanes) provided the product *tert*-Butyl (S)-5-(benzyloxy)-1-formylpentylcarbamate as a yellow oil (1.36 g, 4.23 mmol, 73%).

<sup>1</sup>H NMR (DCCl<sub>3</sub> δ): 1.44 (s, 9H), 1.49-1.72 (m, 6H), 3.47 (t, *J* = 6.2 Hz, 2H), 4.21 (dd, *J* = 12.4, 6.3 Hz, 1H), 4.84 (s, 2H), 5.08 (d, *J* = 6.4 Hz, 1H), 7.32 (s, 5H), 9.56 (s, 1H).

<sup>13</sup>C NMR (DCCl<sub>3</sub>): 22.0 (CH<sub>2</sub>), 28.2 (CH<sub>3</sub>), 28.9 (CH<sub>2</sub>), 29.3 (CH<sub>2</sub>), 59.7 (CH), 69.7 (CH<sub>2</sub>), 72.9 (CH<sub>2</sub>), 80.0 (C), 127.5 (CH), 127.6 (CH), 128.3 (CH), 138.4 (C), 155.5 (C), 199.9 (CH).

ESI-MS: [M+H]<sup>+</sup> calcd. for C<sub>18</sub>H<sub>27</sub>N<sub>1</sub>O<sub>4</sub>Na = 344.1832 found 344.1832. (M.W. 321.4113)

### *tert*-Butyl (S,E)-7-(benzyloxy)-1-(phenylsulfonyl)hept-1-en-3-ylcarbamate Lm1msed47

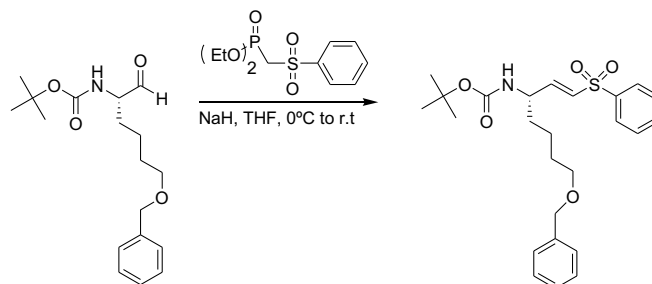

To a cooled (0°C) suspension of hexane-washed NaH (60% in mineral oil; 0.36 g, 9 mmol) in dry THF (50 mL) was added drop-wise DIETHYL[BENZENESULFONYL]METHYL]PHOSPHONATE (2.4 g, 8.2 mmol) in dry THF (10 mL) via syringe. The mixture was stirred for an additional 30 min at 0 °C and *tert*-butyl (S)-5-(benzyloxy)-1-formylpentylcarbamate (2.30 g, 7.2 mmol) in dry THF (10 mL) was added drop-wise. The stirring was continued for 1 h, before a cold 10 wt% NH<sub>4</sub>Cl solution was added to break up the gelatinous emulsion until pH 6~7. The solution was concentrated in vacuo, diluted with water (100 mL) and extracted with EtOAc (3 x 75 mL). The combined organic extracts were dried over Na<sub>2</sub>SO<sub>4</sub>, filtered and concentrated under vacuum. Purification by flash column chromatography (silica gel; using 60% EtOAc in hexanes) provided the product *tert*-Butyl (S,E)-7-(benzyloxy)-1-(phenylsulfonyl)hept-1-en-3-ylcarbamate (8) as a light yellow oil (2.74 g, 6.0 mmol, 83%).

<sup>1</sup>H NMR (DCCl<sub>3</sub> δ): 1.37 (s, 9H), 1.42-1.46 (m, 4H), 1.58-1.61 (m, 2H), 3.44 (t, *J* = 6.1 Hz, 2H), 4.34 (bs, 1H), 4.47 (s, 2H), 4.57 (d, *J* = 8.4 Hz, 1H), 6.40 (dd, *J* = 15.0, 1.2 Hz, 1H), 6.87 (dd, *J* = 15.0, 4.7 Hz, 1H), 7.32 (bs, 5H), 7.48-7.63 (m, 3H), 7.86 (d, *J* = 7.2 Hz, 1H).

<sup>13</sup>C NMR (DCCl<sub>3</sub>): 22.4 (CH<sub>2</sub>), 28.2 (CH<sub>3</sub>), 29.2 (CH<sub>2</sub>), 33.9 (CH<sub>2</sub>), 50.9 (CH), 69.6 (CH<sub>2</sub>), 72.9 (CH<sub>2</sub>), 79.9 (C), 127.5 (CH), 127.6 (CH), 128.3 (CH), 129.2 (CH), 130.1 (CH), 133.4 (CH), 138.3 (C), 140.2 (C), 146.6 (CH), 154.8 (C).(\*) Bidimensional experiments show that two CH share the same magnetic shift.

ESI-MS: [M+H]<sup>+</sup> calcd. for C<sub>20</sub>H<sub>32</sub>N<sub>2</sub>O<sub>5</sub>Na = 482.1972 found 482.1972. (M.W. 459.5982)

**(2S)-N-((S,E)-7-(benzyloxy)-1-(phenylsulfonyl)hept-1-en-3-yl)piperidine-2-carboxamide**  
**Lm1msed55 (hPro-nLeu(O-Bzl)-VS)**

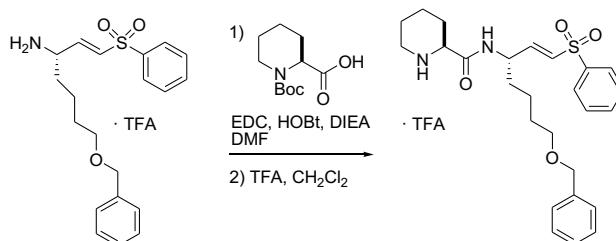

$^1\text{H NMR}$  (*MeOD-d<sub>4</sub>*  $\delta$ ): 1.35-1.45 (m, 2H), 1.56-1.69 (m, 7H), 1.82-1.88 (m, 2H), 2.14 (d,  $J = 9.5$  Hz, 1H), 2.97 (t,  $J = 12.4$  Hz, 1H), 3.36 (d,  $J = 12.9$  Hz, 1H), 3.45 (t,  $J = 6.3$  Hz, 2H), 3.78 (dd,  $J = 11.2, 2.9$  Hz, 1H), 4.46 (s, 2H), 4.56 (dd,  $J = 13.3, 5.9$  Hz, 1H), 6.56 (d,  $J = 15.2$  Hz, 1H), 6.89 (dd,  $J = 15.2, 5.7$  Hz, 1H), 7.30-7.33 (bs, 5H), 7.59 (t,  $J = 7.7$  Hz, 2H), 7.68 (t,  $J = 7.4$  Hz, 1H), 7.87 (d,  $J = 7.6$  Hz, 2H).

$^{13}\text{C NMR}$  (*MeOD-d<sub>4</sub>*  $\delta$ ): 22.7 (CH<sub>2</sub>), 22.9 (CH<sub>2</sub>), 23.6 (CH<sub>2</sub>), 28.6 (CH<sub>2</sub>), 30.0 (CH<sub>2</sub>), 33.9 (CH<sub>2</sub>), 44.9 (CH<sub>2</sub>), 51.2 (CH), 58.9 (CH), 70.9 (CH<sub>2</sub>), 73.8 (CH<sub>2</sub>), 128.6 (CH), 128.7 (CH), 128.9 (CH), 129.4 (CH), 130.6 (CH), 132.0 (CH), 134.9 (CH), 139.7 (C), 141.5 (C), 147.2 (CH), 169.8 (C).

**ESI-MS:**  $[\text{M}+\text{H}]^+$  calcd. for C<sub>26</sub>H<sub>35</sub>N<sub>2</sub>O<sub>4</sub>S = 471.2312 found 471.2314. (M.W. 584.6481)

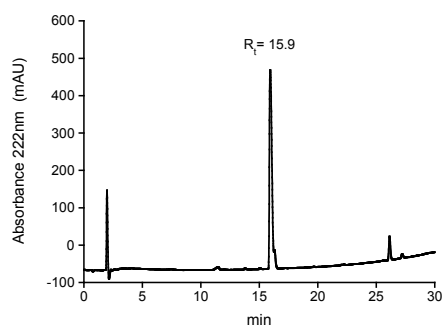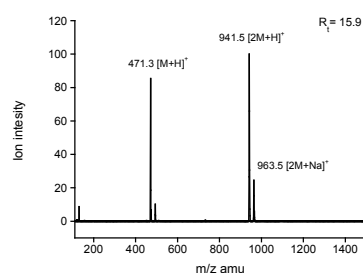

**(2S)-2-amino-N-((S,E)-7-(benzyloxy)-1-(phenylsulfonyl)hept-1-en-3-yl)-3-(naphthalen-2-yl)propanamide**  
**Lm1msed56 (2Nal-nLeu(O-Bzl)-VS)**

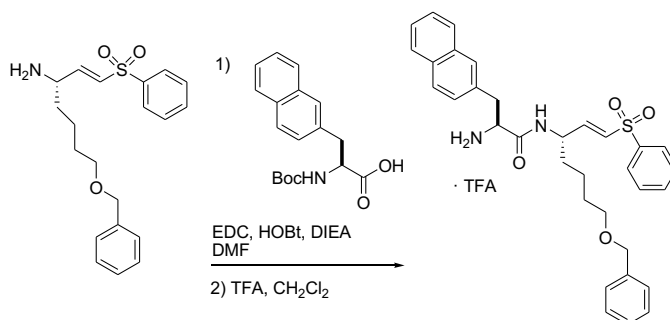

$^1\text{H NMR}$  (*MeOD-d<sub>4</sub>*  $\delta$ ): 1.29-1.37 (m, 2H), 1.50-1.61 (m, 4H), 3.18-3.28 (m, 3H), 3.41 (t,  $J = 6.3$  Hz, 1H), 4.15 (t,  $J = 7.3$  Hz, 1H), 4.53 (q,  $J = 6.4$  Hz, 1H), 4.40 (s, 2H), 6.27 (d,  $J = 15.2$  Hz, 1H), 6.74 (dd,  $J$



= 15.2, 5.8 Hz, 1H), 7.30 (bs, 6H), 7.51 (bs, 4H), 7.63 (t, J = 7.4 Hz, 1H), 7.69-7.74 (m 3H), 7.83-7.87 (m, 3H).

**<sup>13</sup>C NMR (MeOD-d<sub>4</sub> δ):** 23.5 (CH<sub>2</sub>), 30.2 (CH<sub>2</sub>), 34.1 (CH<sub>2</sub>), 38.8 (CH<sub>2</sub>), 51.4 (CH), 55.7 (CH), 70.9 (CH<sub>2</sub>), 73.9 (CH<sub>2</sub>), 127.3 (CH), 127.6 (CH), 128.1 (CH), 128.6 (CH), 128.7 (CH), 128.8 (CH), 128.9 (CH), 129.0 (CH), 129.4 (CH), 129.6 (CH), 130.1 (CH), 130.6 (CH), 132.2 (CH), 132.9 (C), 134.3 (C), 134.8 (CH), 135.0 (C), 139.7 (C), 141.6 (C), 146.8 (CH), 169.3 (C).

**ESI-MS:** [M+H]<sup>+</sup> calcd. for C<sub>33</sub>H<sub>37</sub>N<sub>2</sub>O<sub>4</sub>S = 557.2469 found 557.2464. (M.W. 670.7383)

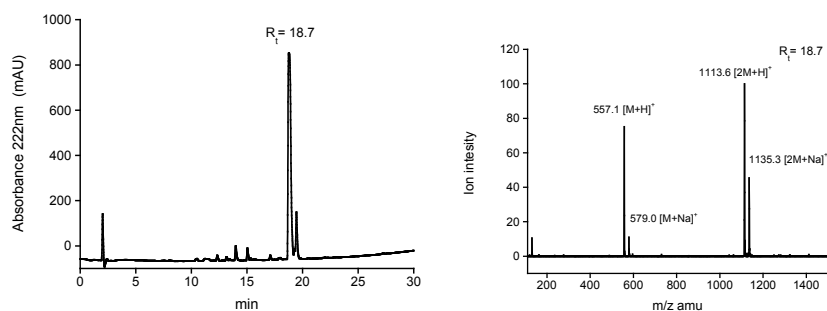

**(2S)-2-amino-N-((S,E)-7-(benzyloxy)-1-(phenylsulfonyl)hept-1-en-3-yl)-2-(2,3-dihydro-1H-inden-2-yl)acetamide Lm1msed57 (Igl-nLeu(O-Bzl)-VS)**

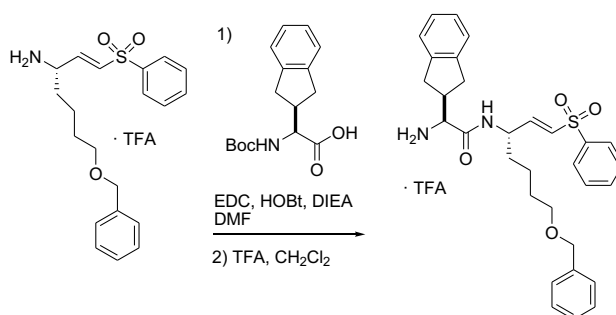

**<sup>1</sup>H NMR (MeOD-d<sub>4</sub> δ):** 1.37-1.47 (m, 2H), 1.58-1.70 (m, 4H), 2.84 (dd, J = 18.7, 5.2 Hz, 4H), 2.99-3.04 (m, 1H), 3.47 (t, J = 6.2 Hz, 2H), 3.89 (d, J = 6.8 Hz, 1H), 4.47 (s, 2H), 4.58 (dd, J = 13.9, 6.8 Hz, 1H), 6.63 (d, J = 15.1 Hz, 1H), 6.86 (dd, J = 15.1, 6.5 Hz, 1H), 7.16 (bs, 4H), 7.32 (bs, 5H), 7.54 (t, J = 7.7 Hz, 2H), 7.60-7.67 (m, 1H), 7.84 (d, J = 7.8 Hz, 2H).

**<sup>13</sup>C NMR (MeOD-d<sub>4</sub> δ):** 23.7 (CH<sub>2</sub>), 30.2 (CH<sub>2</sub>), 34.0 (CH<sub>2</sub>), 36.3 (CH<sub>2</sub>), 43.1 (CH), 51.5 (CH), 57.8 (CH), 71.0 (CH<sub>2</sub>), 73.9 (CH<sub>2</sub>), 125.5 (CH), 128.0 (CH), 128.6 (CH), 128.7 (CH), 128.9 (CH), 129.4 (CH), 130.7 (CH), 132.9 (CH), 134.9 (CH), 139.6 (C), 142.1 (C), 142.2 (C), 146.4 (CH), 169.2 (C).

**ESI-MS:** [M+H]<sup>+</sup> calcd. for C<sub>31</sub>H<sub>37</sub>N<sub>2</sub>O<sub>4</sub>S = 533.2469 found 533.2463. (M.W. 646.7169)

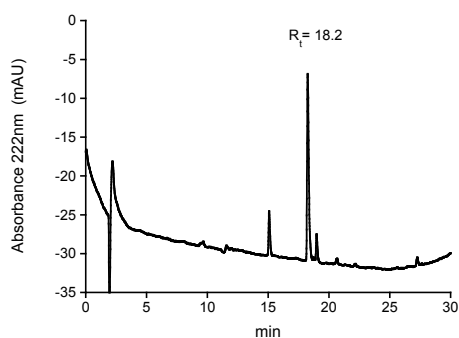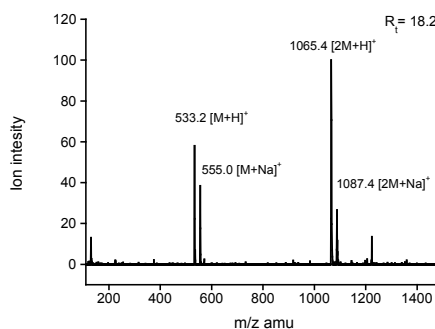

**(2S)-2-amino-N-((S,E)-7-(benzyloxy)-1-(phenylsulfonyl)hept-1-en-3-yl)-3-(4-hydroxy-3-nitrophenyl)propanamide Lm1msed58 (Tyr(NO2)-nLeu(O-Bzl)-VS)**

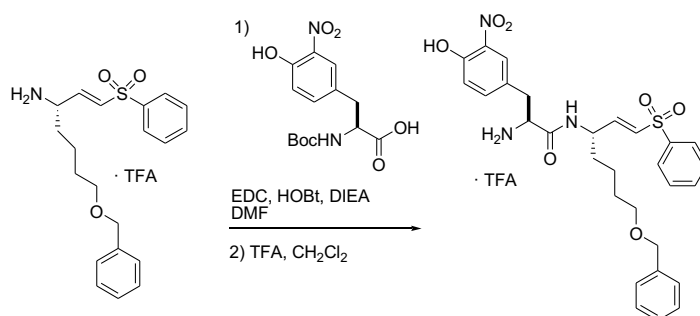

**<sup>1</sup>H NMR (MeOD-d<sub>4</sub> δ):** 1.35-1.41 (m, 2H), 1.54-1.63 (m, 4H), 3.10 (dq, *J* = 14.1, 7.4 Hz, 2H), 3.45 (t, *J* = 6.2 Hz, 2H), 4.05 (t, *J* = 7.3 Hz, 1H), 4.45 (s, 2H), 4.55 (dd, *J* = 12.9, 6.3 Hz, 1H), 6.25 (d, *J* = 15.2 Hz, 1H), 6.72 (dd, *J* = 15.2, 5.8 Hz, 1H), 7.15 (d, *J* = 8.6 Hz, 1H), 7.30 (bs, 5H), 7.44 (dd, *J* = 8.6, 1.9 Hz, 1H), 7.58 (t, *J* = 7.6 Hz, 2H), 7.67 (t, *J* = 7.4 Hz, 1H), 7.85 (d, *J* = 7.6 Hz, 2H), 7.99 (d, *J* = 1.8 Hz, 1H).

**<sup>13</sup>C NMR (MeOD-d<sub>4</sub> δ):** 23.5 (CH<sub>2</sub>), 30.2 (CH<sub>2</sub>), 34.2 (CH<sub>2</sub>), 37.3 (CH<sub>2</sub>), 51.3 (CH), 55.3 (CH), 70.9 (CH<sub>2</sub>), 73.9 (CH<sub>2</sub>), 121.8 (CH), 127.0 (CH), 127.4 (CH), 128.7 (CH), 128.8 (CH), 128.9 (CH), 129.4 (CH), 130.6 (C), 132.3 (CH), 134.9 (CH), 135.9 (C), 138.9 (CH), 139.7 (C), 141.6 (C), 146.7 (CH), 155.1 (C), 168.8 (C).

**ESI-MS:** [M+H]<sup>+</sup> calcd. for C<sub>29</sub>H<sub>34</sub>N<sub>3</sub>O<sub>7</sub>S = 568.2112 found 568.2102. (M.W. 681.6766)

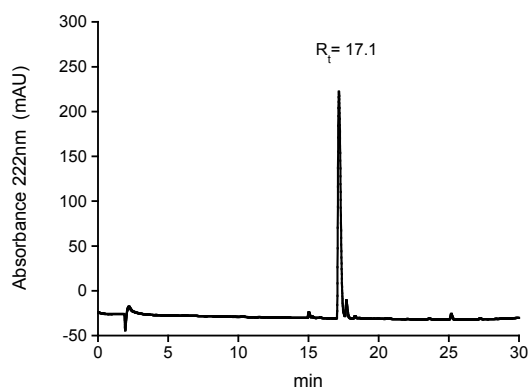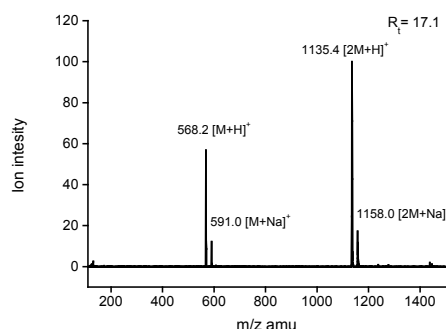

**(2S)-2-amino-N-((S,E)-7-(benzyloxy)-1-(phenylsulfonyl)hept-1-en-3-yl)-3-(1H-indol-3-yl)propanamide Lm1msed68 (Trp-nLeu(O-Bzl)-VS)**

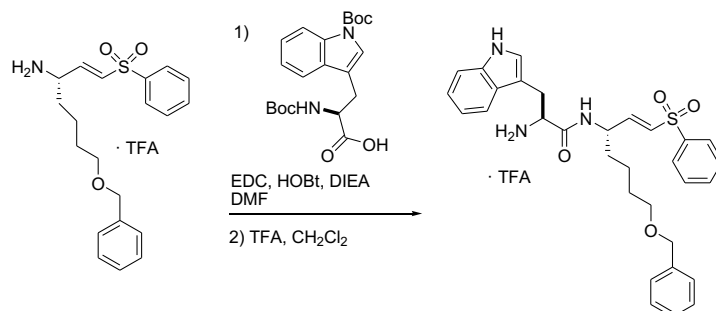

$^1\text{H NMR}$  ( $\text{MeOD-d}_4$   $\delta$ ): 1.31-1.37 (m, 2H), 1.49-1.59 (m, 4H), 3.20 (dd,  $J = 14.5, 7.0$  Hz, 1H), 3.34 (d,  $J = 7.8$  Hz, 1H), 3.43 (t,  $J = 6.2$  Hz, 2H), 4.09 (t,  $J = 7.4$  Hz, 1H), 4.44 (s, 2H), 4.52 (q,  $J = 6.2$  Hz, 1H), 6.12 (d,  $J = 15.2$  Hz, 1H), 6.73 (dd,  $J = 15.2, 5.5$  Hz, 1H), 7.05 (t,  $J = 7.4$  Hz, 1H), 7.21 (bs, 2H), 7.30 (bs, 5H), 7.40 (d,  $J = 8.1$  Hz, 1H), 7.54 (t,  $J = 7.6$  Hz, 2H), 7.59-7.66 (m, 2H), 7.80 (d,  $J = 7.8$  Hz, 2H).

$^{13}\text{C NMR}$  ( $\text{MeOD-d}_4$   $\delta$ ): 23.5 ( $\text{CH}_2$ ), 29.0 ( $\text{CH}_2$ ), 30.2 ( $\text{CH}_2$ ), 34.2 ( $\text{CH}_2$ ), 51.2 (CH), 54.9 (CH), 71.0 ( $\text{CH}_2$ ), 73.9 ( $\text{CH}_2$ ), 108.0 (C), 112.9 (CH), 119.1 (CH), 120.4 (CH), 123.0 (CH), 125.5 (CH), 128.1 (C), 128.7 (CH), 128.8 (C), 128.9 (CH), 129.4 (CH), 130.6 (CH), 132.0 (CH), 134.8 (CH), 138.2 (C), 139.7 (C), 141.6 (C), 146.8 (CH), 169.8 (C).

**ESI-MS:**  $[\text{M}+\text{H}]^+$  calcd. for  $\text{C}_{31}\text{H}_{36}\text{N}_3\text{O}_4\text{S} = 546.2421$  found 546.2438. (M.W. 773.7390)

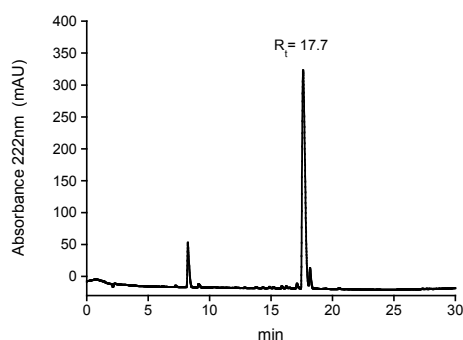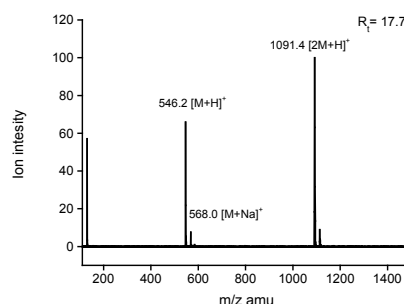

**(S,E)-7-(benzyloxy)-1-(phenylsulfonyl)hept-1-en-3-amine trifluoroacetate Lm1msed69**

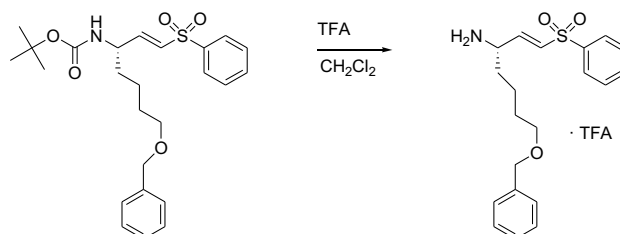

To a cooled ( $0^\circ\text{C}$ ) solution of *tert*-butyl (S,E)-7-(benzyloxy)-1-(phenylsulfonyl)hept-1-en-3-ylcarbamate (0.2 g, 0.43 mmol) in  $\text{CH}_2\text{Cl}_2$  (5 mL) was added drop-wise TFA (1 mL) via syringe and stirred for 30 min. After checking by HPLC-MS that all the starting material was consumed, the solvent was removed under reduced pressure, and the residual TFA was removed by co-distillation

with CH<sub>2</sub>Cl<sub>2</sub> and finally dried in vacuo to give (S,E)-7-(benzyloxy)-1-(phenylsulfonyl)hept-1-en-3-amine as a trifluoroacetic salt (0.2 g; 0.43 mmol, 99%). This material was pure enough to be used in the next step without further purification.

<sup>1</sup>H NMR (MeOD<sub>4</sub> δ): 1.35-1.44 (m, 2H), 1.55-1.66 (m, 2H), 1.71-1.83 (m, 2H), 3.45 (t, J = 6.0 Hz, 2H), 3.98 (dd, J = 13.9, 6.9 Hz, 1H), 4.46 (s, 2H), 6.86 (dd, J = 15.3, 6.9 Hz, 1H), 6.97 (d, J = 15.3 Hz, 1H), 7.32 (bs, 5H), 7.56-7.62 (m, 2H), 7.69 (d, J = 7.1 Hz, 1H), 7.91 (d, J = 7.1 Hz, 2H).

<sup>13</sup>C NMR (MeOD<sub>4</sub>): 22.8 (CH<sub>2</sub>), 29.7 (CH<sub>2</sub>), 32.9 (CH<sub>2</sub>), 52.2 (CH), 70.4 (CH<sub>2</sub>), 73.6 (CH<sub>2</sub>), 128.5 (CH), 128.6 (CH), 128.7 (CH), 129.2 (CH), 130.5 (CH), 134.9 (CH), 136.2 (CH), 139.4 (C), 140.6 (C), 140.8 (CH), 161 (q, C, TFA).

ESI-MS: [M+H]<sup>+</sup> calcd. for C<sub>20</sub>H<sub>25</sub>NO<sub>3</sub>SNa = 382.1447 found 382.1458. (M.W. 473.5057)

**(2R)-2-amino-N-((S,E)-7-(benzyloxy)-1-(phenylsulfonyl)hept-1-en-3-yl)-3-(1H-indol-3-yl)propanamide Lm1msed71 (L-Trp-nLeu(O-Bzl)-VS)**

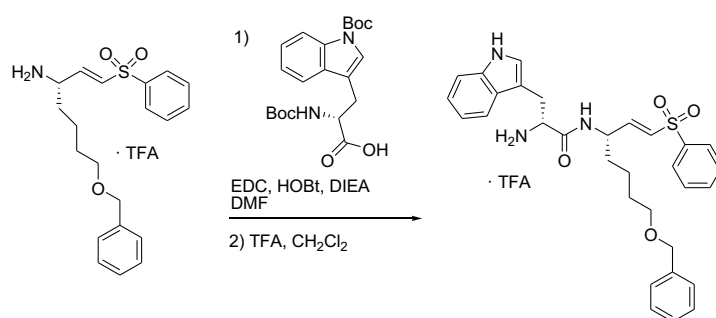

<sup>1</sup>H NMR (MeOD-*d*<sub>4</sub> δ): 0.95-1.02 (m, 2H), 1.09-1.18 (m, 1H), 1.28-1.35 (m, 1H), 1.37-1.45 (m, 2H), 3.21 (dd, J = 14.4, 7.2 Hz, 1H), 3.33-3.38 (m, 3H), 4.05 (t, J = 7.6 Hz, 1H), 4.43 (bs, 3H), 6.61 (d, J = 15.2 Hz, 1H), 6.81 (dd, J = 15.1, 5.2 Hz, 1H), 7.04 (t, J = 7.4 Hz, 1H), 7.11 (t, J = 7.5 Hz, 1H), 7.16 (s, 1H), 7.28 (s, 2H), 7.29 (s, 2H), 7.35 (d, J = 8.1 Hz, 1H), 7.54-7.59 (m, 4H), 7.66 (t, J = 7.4 Hz, 1H), 7.84 (d, J = 7.5 Hz, 2H).

<sup>13</sup>C NMR (MeOD-*d*<sub>4</sub> δ): 23.2 (CH<sub>2</sub>), 29.0 (CH<sub>2</sub>), 30.1 (CH<sub>2</sub>), 33.9 (CH<sub>2</sub>), 51.3 (CH), 55.3 (CH), 70.9 (CH<sub>2</sub>), 73.9 (CH<sub>2</sub>), 108.2 (C), 112.7 (CH), 119.1 (CH), 120.3 (CH), 122.9 (CH), 125.5 (CH), 128.4 (C), 128.7 (CH), 128.8 (CH), 129.4 (CH), 130.6 (CH), 132.0 (CH), 134.8 (CH), 138.2 (C), 139.8 (C), 141.7 (C), 147.0 (CH), 169.8 (C).

ESI-MS: [M+H]<sup>+</sup> calcd. for C<sub>31</sub>H<sub>36</sub>N<sub>3</sub>O<sub>4</sub>S = 546.2421 found 546.2411. (M.W. 773.7390)

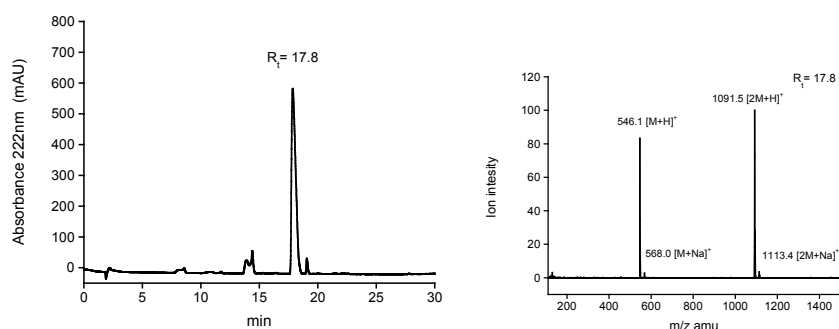

## Supplemental Figures Legends.

**Figure S1. Michaelis Menten fits for rDPAP3.** The turnover rate of the indicate substrate was measure at different substrate concentration and 1 nM rDPAP3 in assay buffer. Data was fitted in Prism to a Michaelis Menten model.  $K_m$ ,  $k_{cat}$ , and  $k_{cat}/K_m$  values are reported in Table 1.

**Figure S2. Irreversible inhibition fits for rDPAP3.** The decrease in substrate turnover rate by rDPAP3 was measured over 40min at different concentration of the indicated inhibitor. Each progress at each inhibitor concentration was fitted to Eq. 2 to obtain  $k_{obs}$  value (upper left graph). These values were then fitted to Eqs 3 and 4 as a function of inhibitor concentration to obtain  $k_{inact}$ ,  $K_i$ , and  $k_{inact}/K_i$  (Reported in Tables 2 and 3).

**Figure S3. Irreversible inhibition fits for CatC and DPAP1.** The decrease in substrate turnover rate by rDPAP3 was measured over 40min at different concentration of the indicated inhibitor. Each progress at each inhibitor concentration was fitted to Eq. 2 to obtain  $k_{obs}$  value (upper left graph). These values were then fitted to Eqs 3 and 4 as a function of inhibitor concentration to obtain  $k_{inact}$ ,  $K_i$ , and  $k_{inact}/K_i$  (Reported in Tables 2 and 3).

**Figure S4. High resolution mass spectra of DPAP fluorogenic substrates.**

**Fig. S1**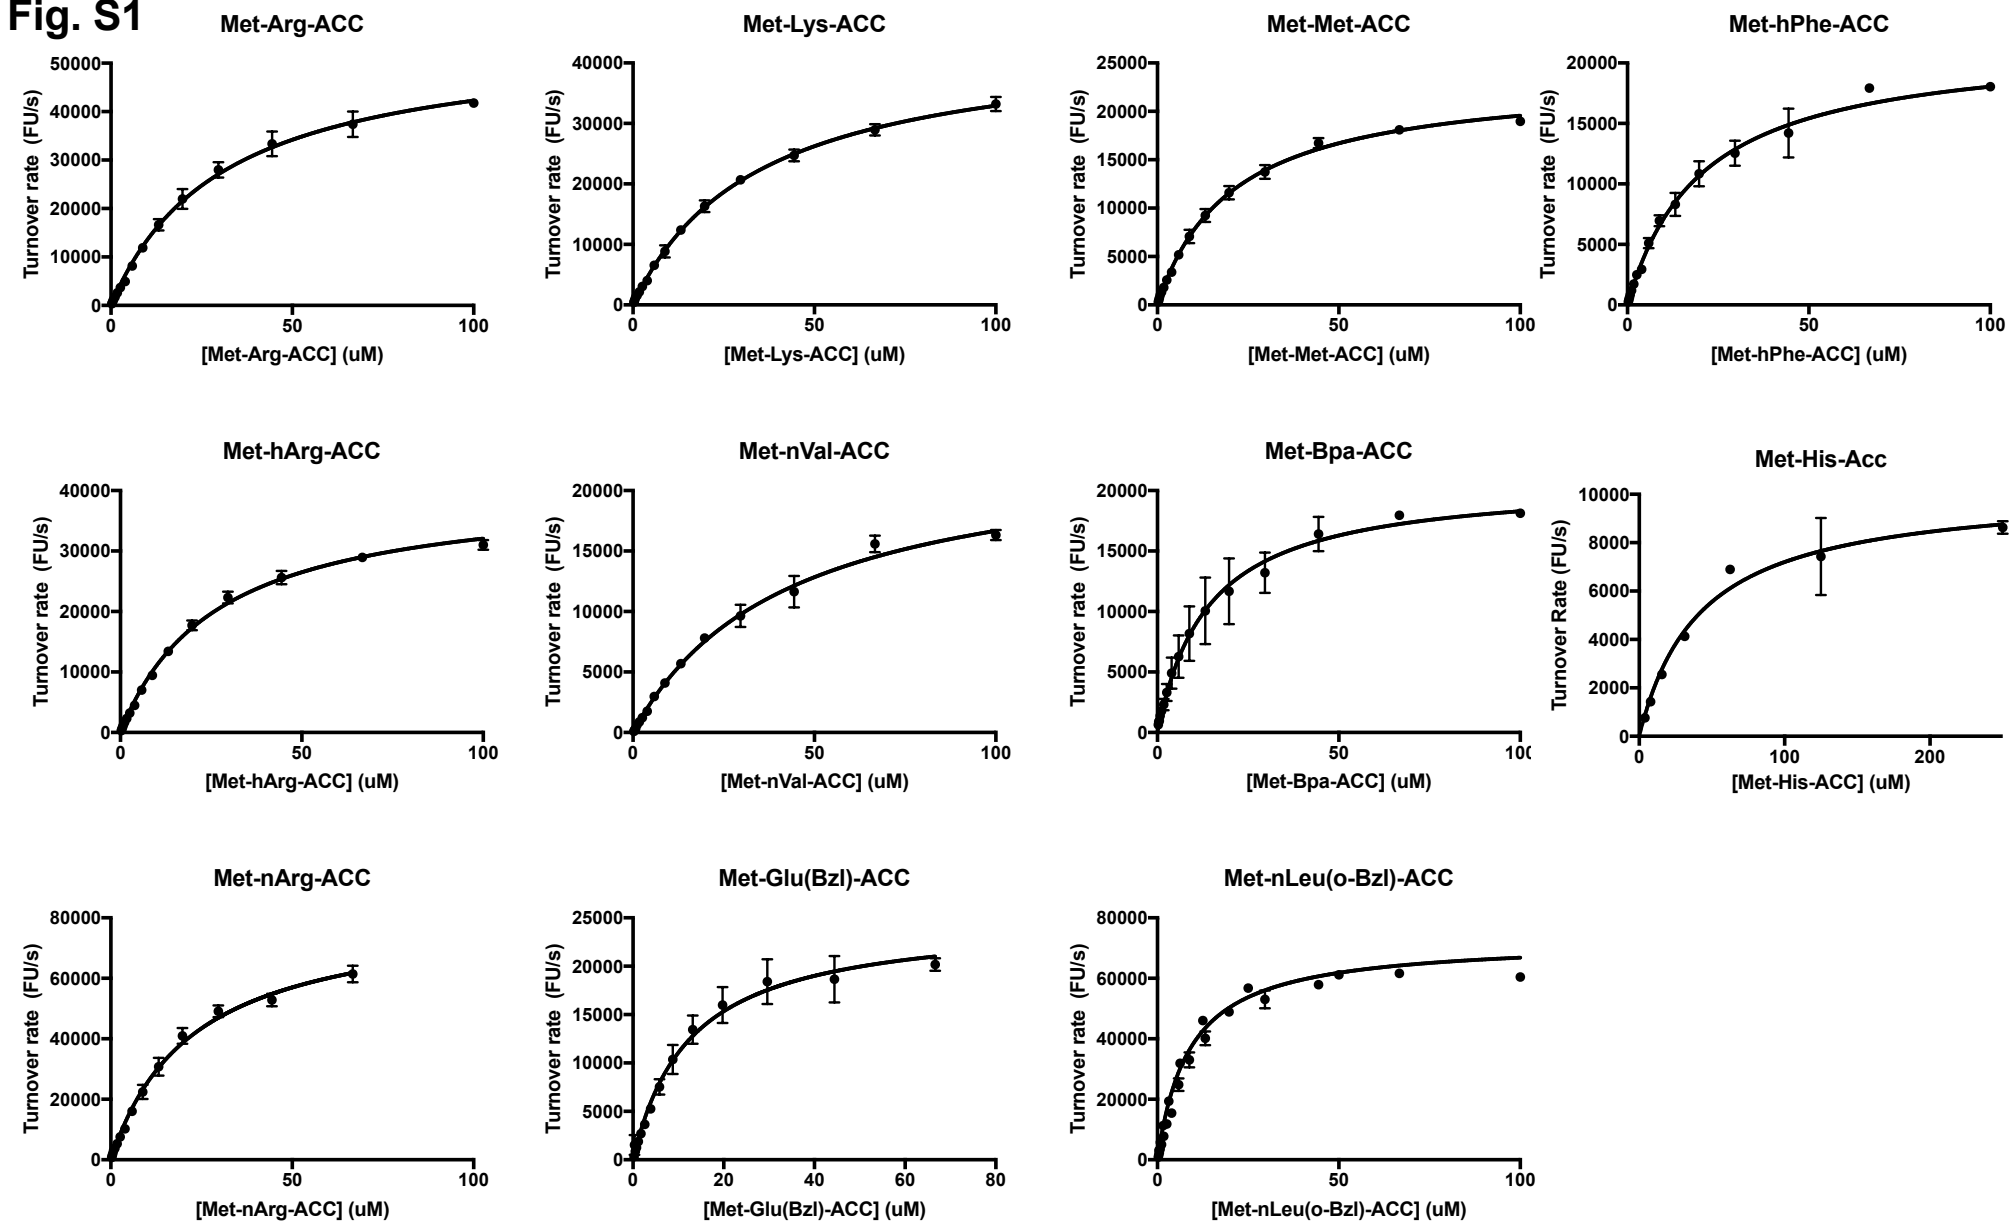

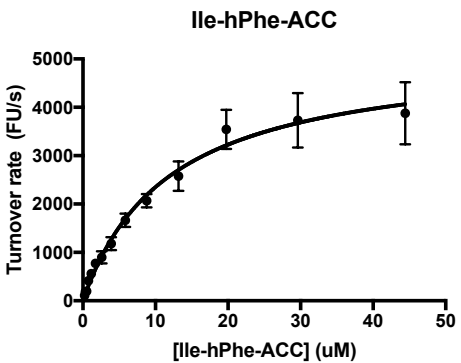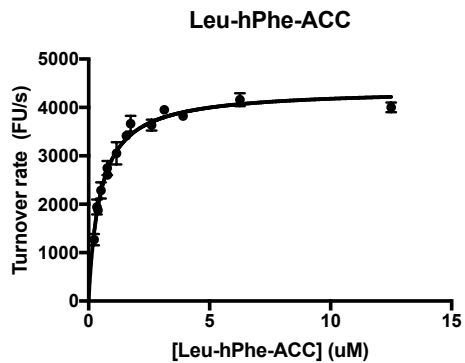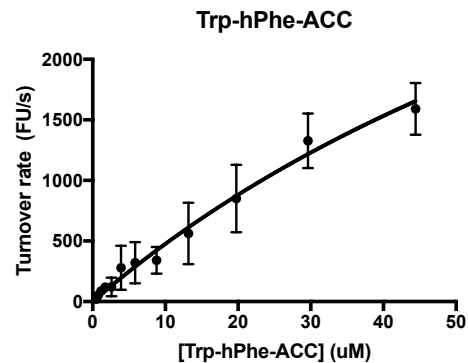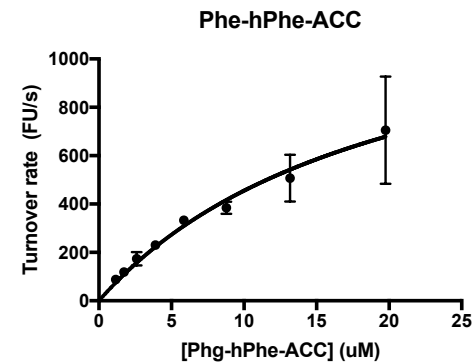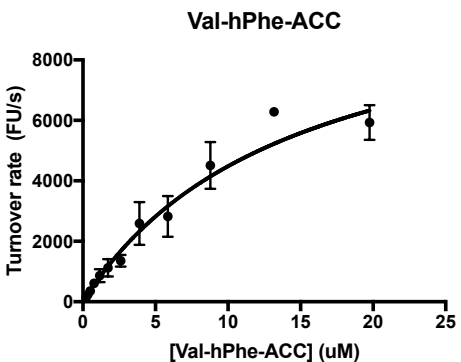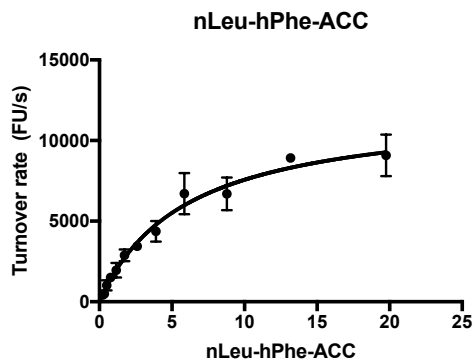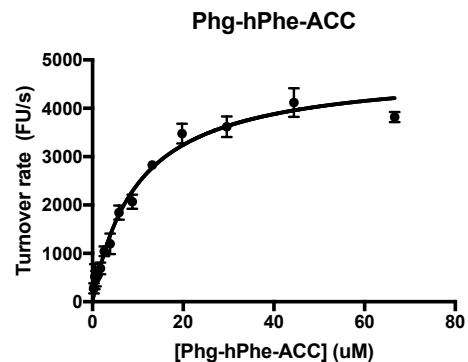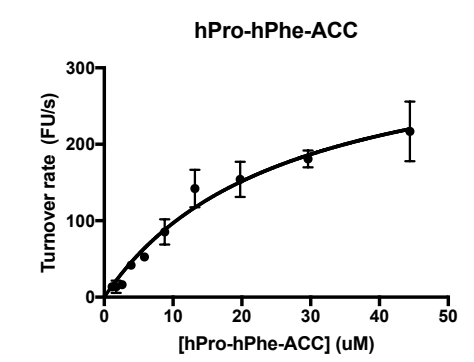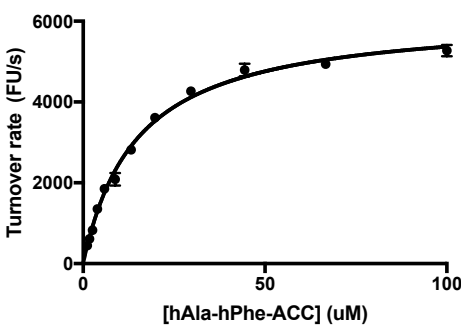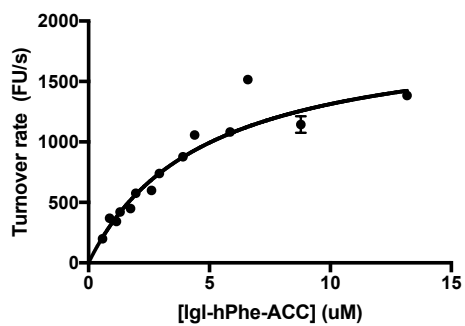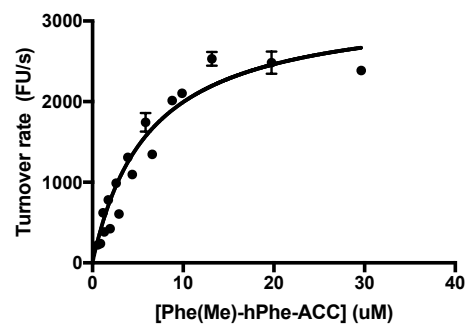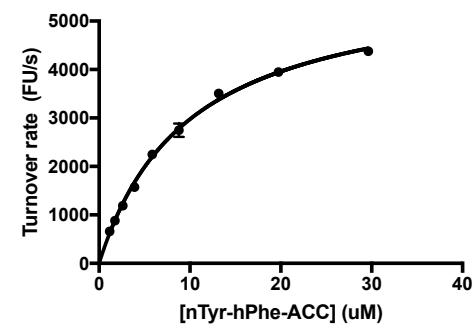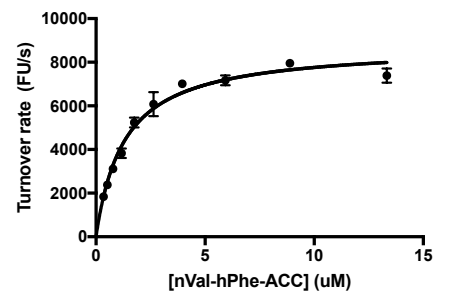

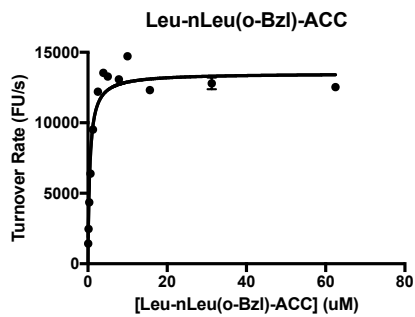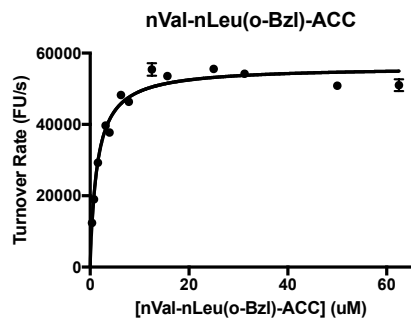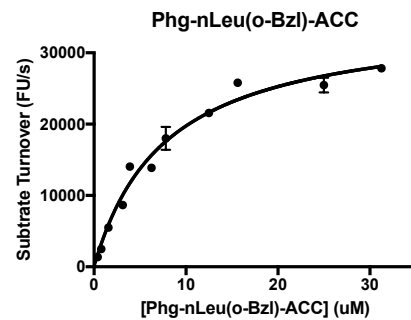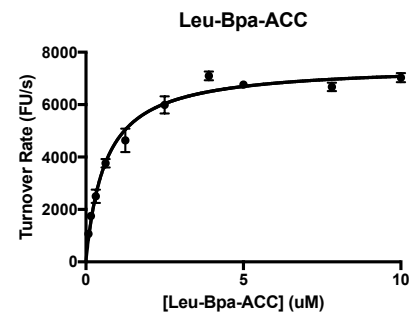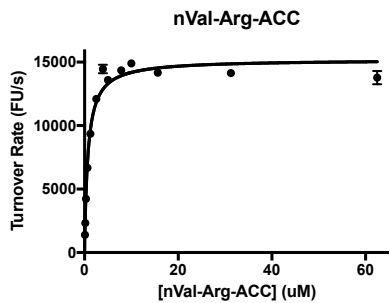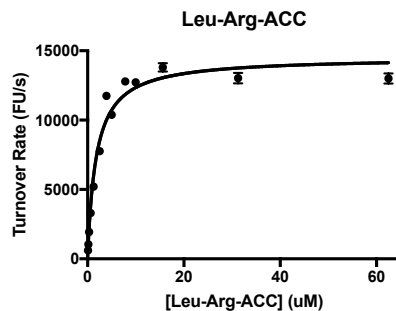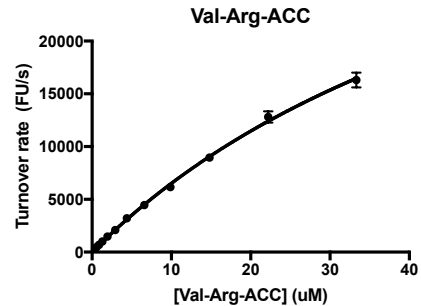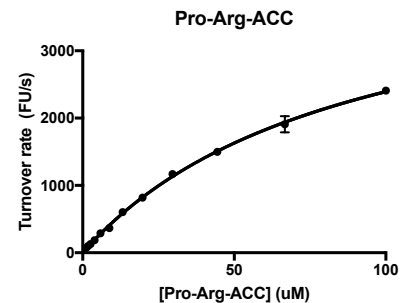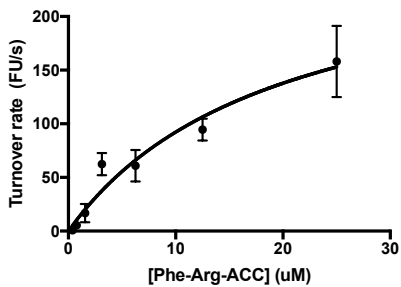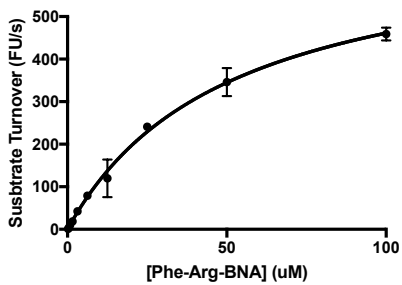



Fig. S2

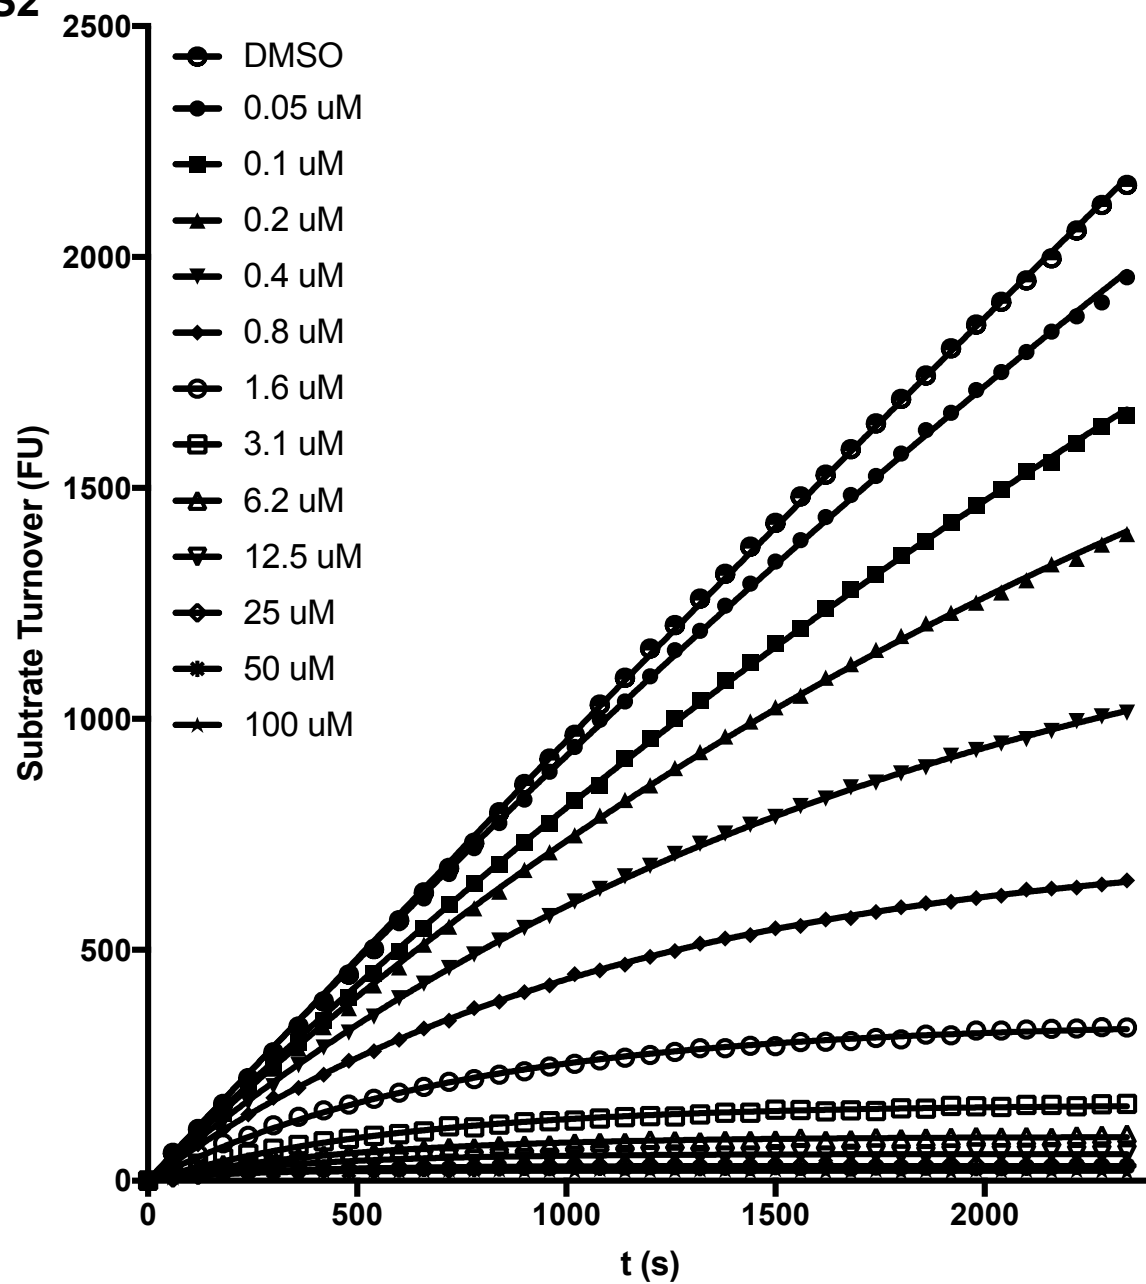**P2: Gly**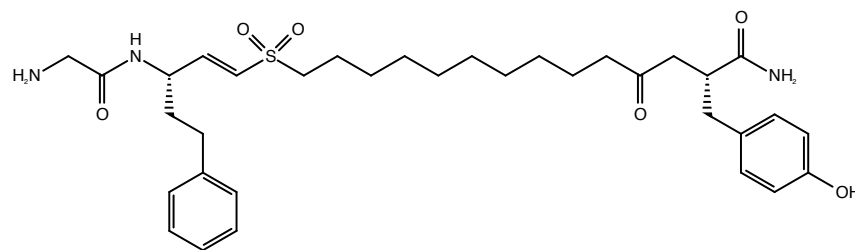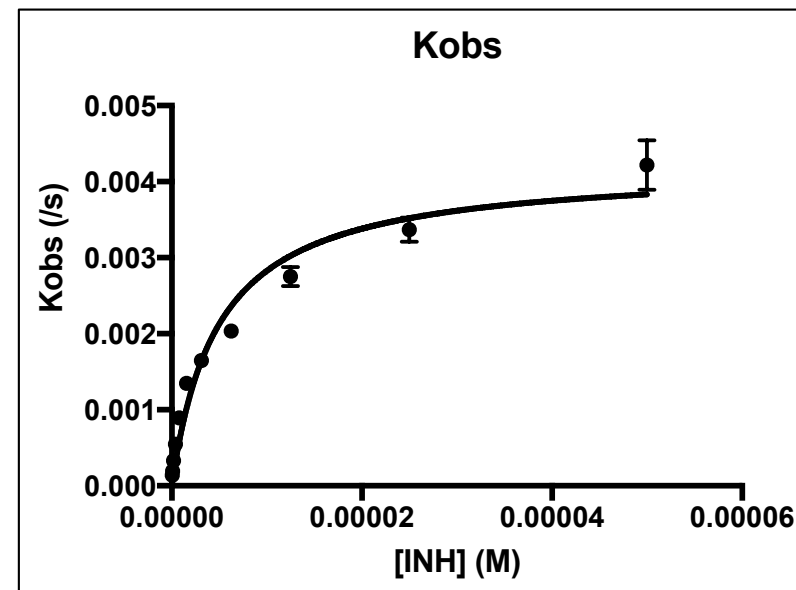

$$k_{\text{inact}} = 0.0042 \pm 0.0003 \text{ s}^{-1}$$

$$K_i = 3.3 \pm 0.7 \text{ } \mu\text{M}$$

$$K_{\text{inact}}/K_i = 1300 \pm 230 \text{ M}^{-1}\text{s}^{-1}$$

# P2: Ala

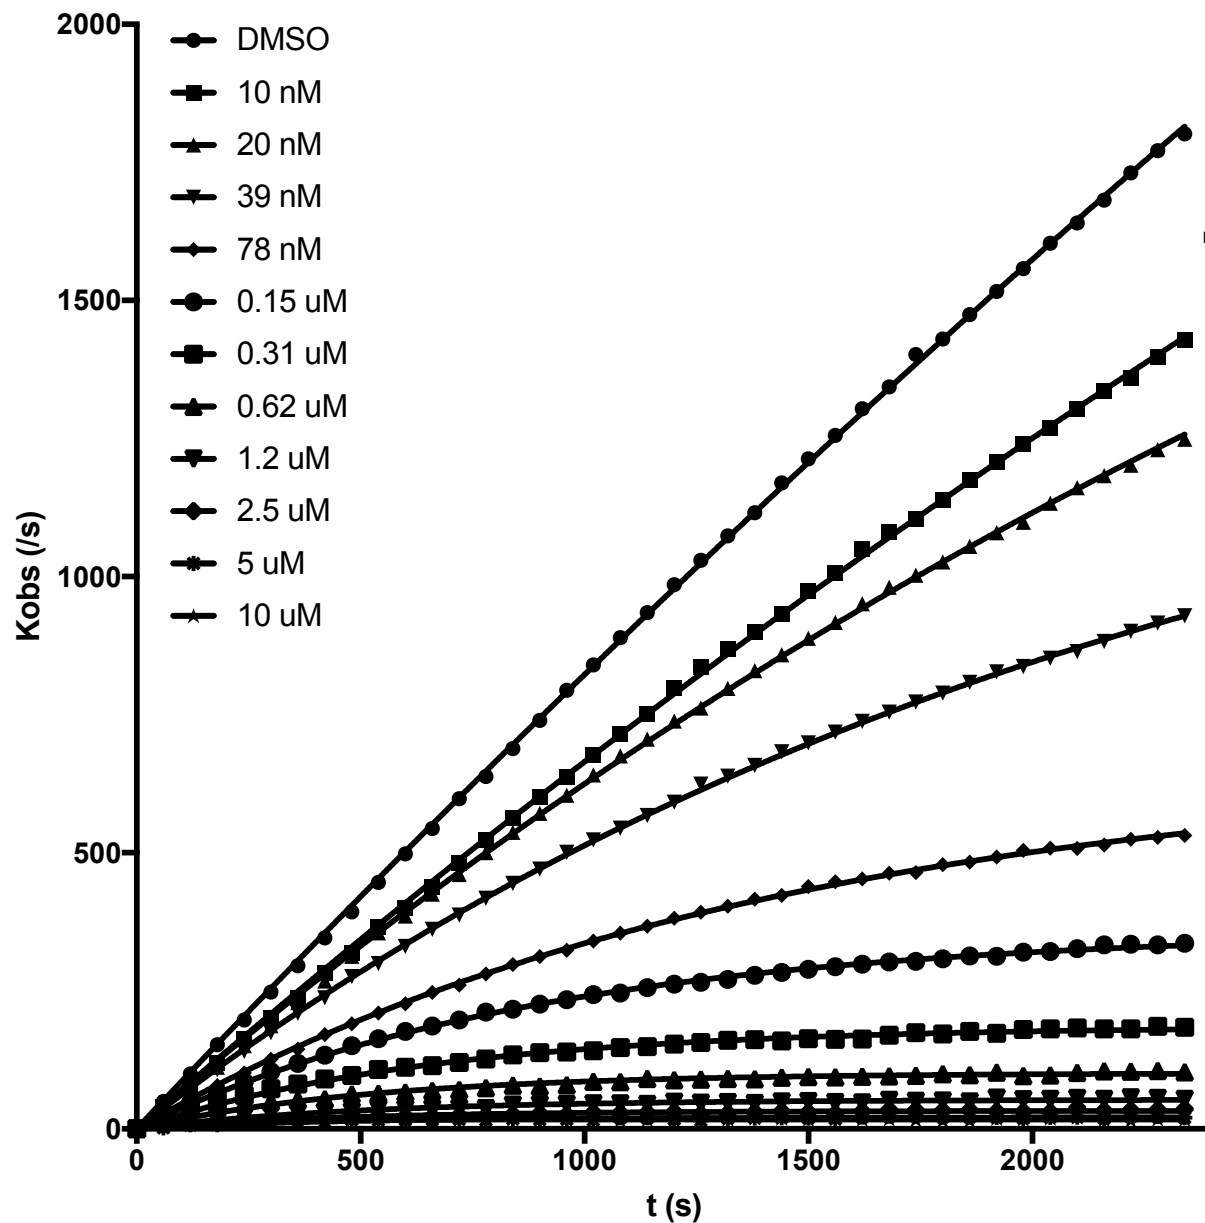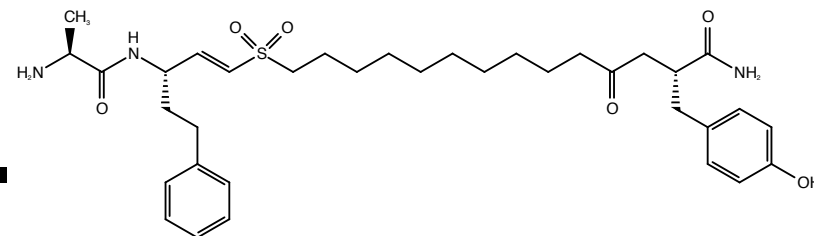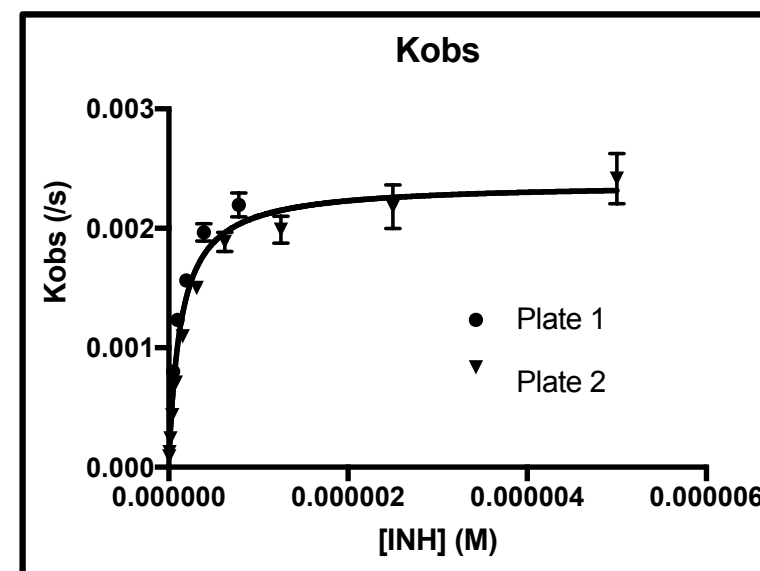

$$k_{\text{inact}} = 0.0024 \pm 0.0001 \text{ s}^{-1}$$

$$K_i = 88 \pm 13 \text{ nM}$$

$$K_{\text{inact}}/K_i = 27000 \pm 3100 \text{ M}^{-1}\text{s}^{-1}$$

# P2: ACPC

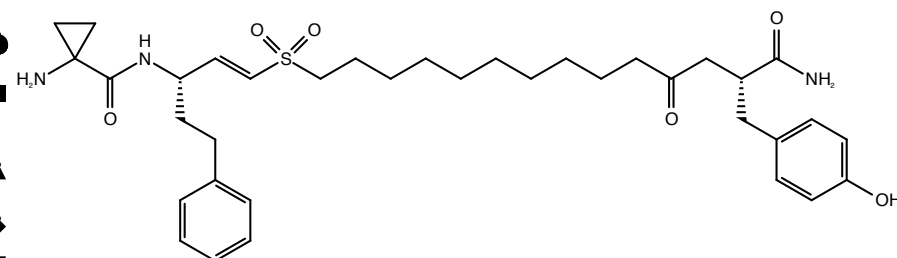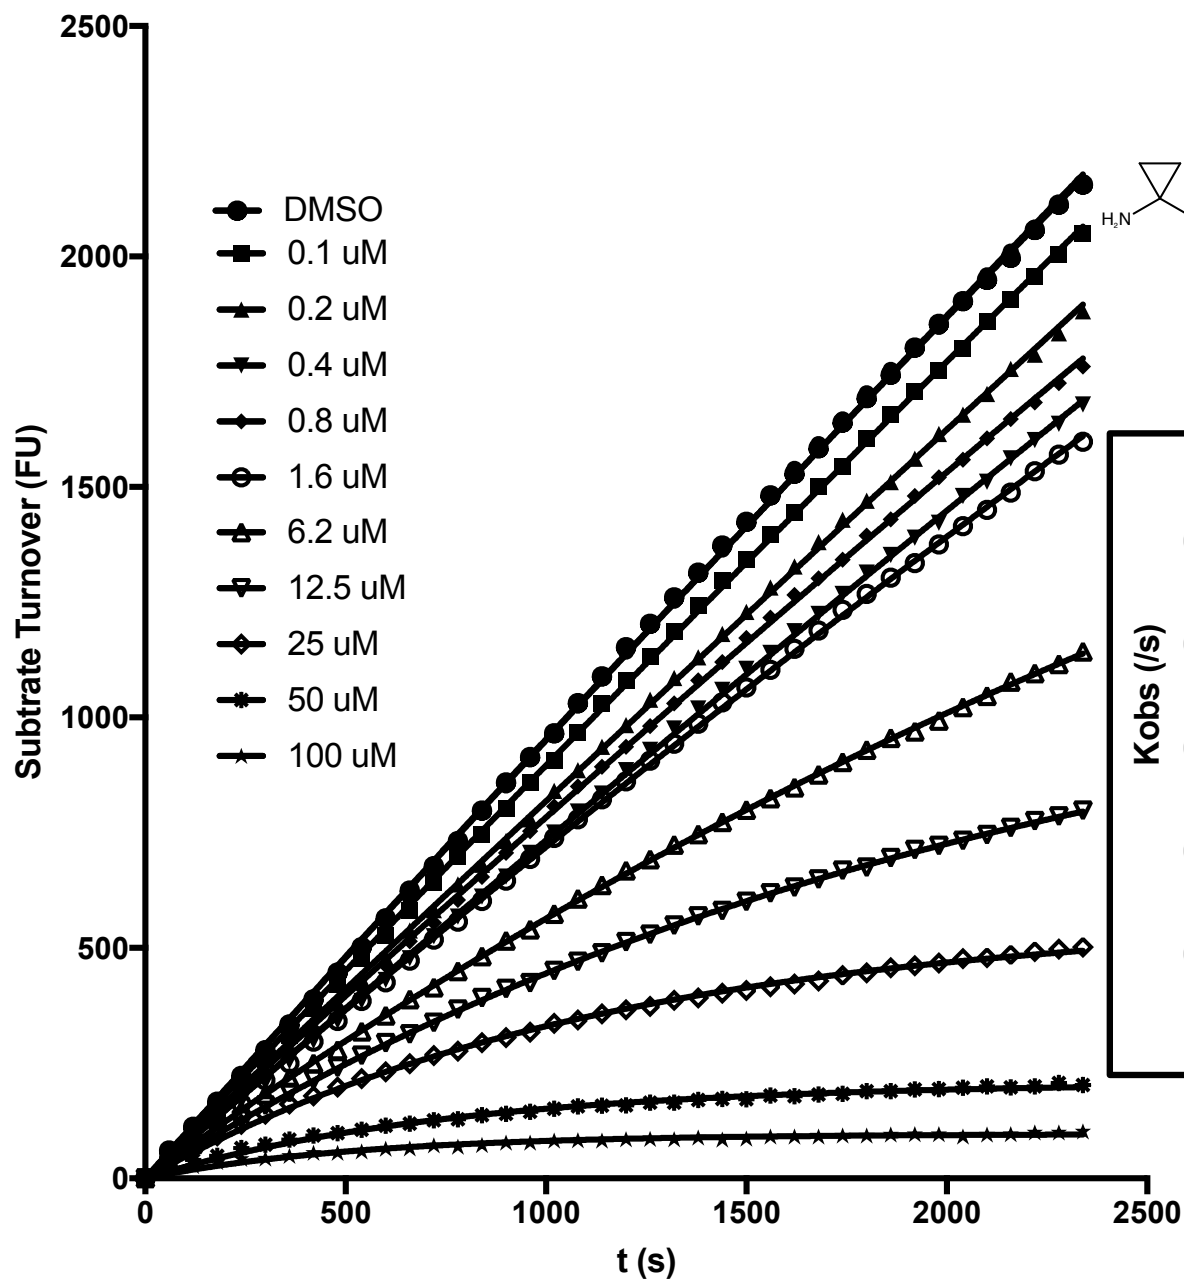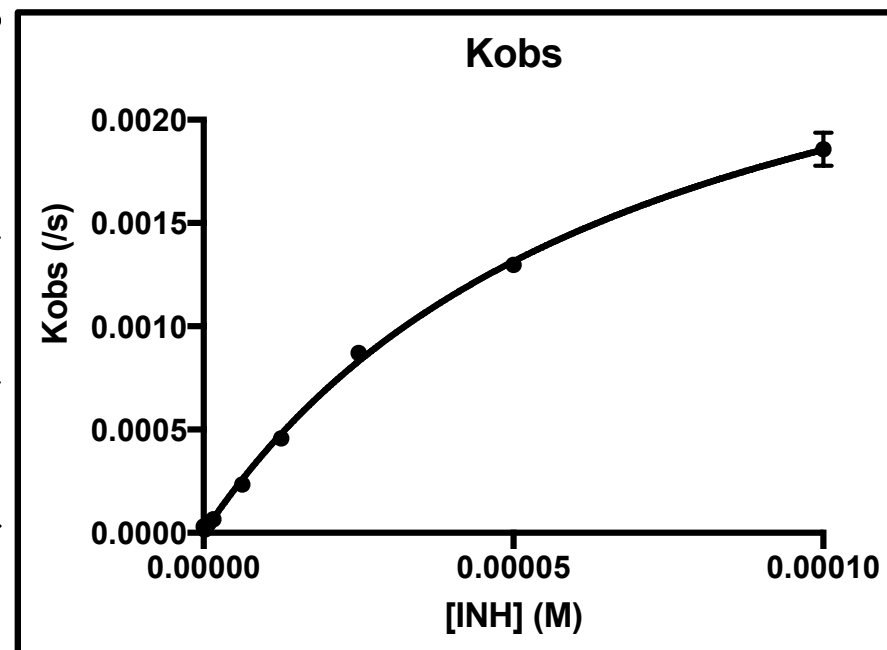

$$k_{\text{inact}} = 0.00315 \pm 0.0001 \text{ s}^{-1}$$
$$K_i = 47 \pm 3 \text{ uM}$$
$$K_{\text{inact}}/K_i = 67.7 \pm 0.1 \text{ M}^{-1}\text{s}^{-1}$$

# P2: 2Abu

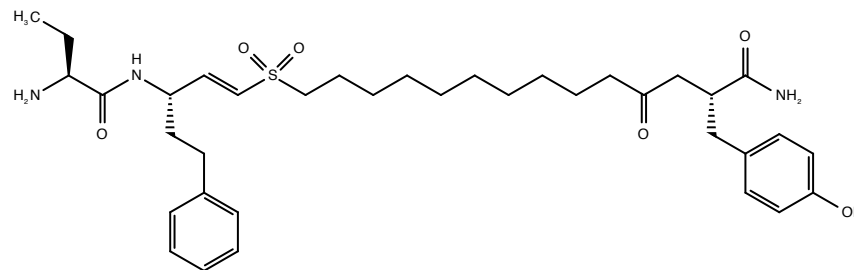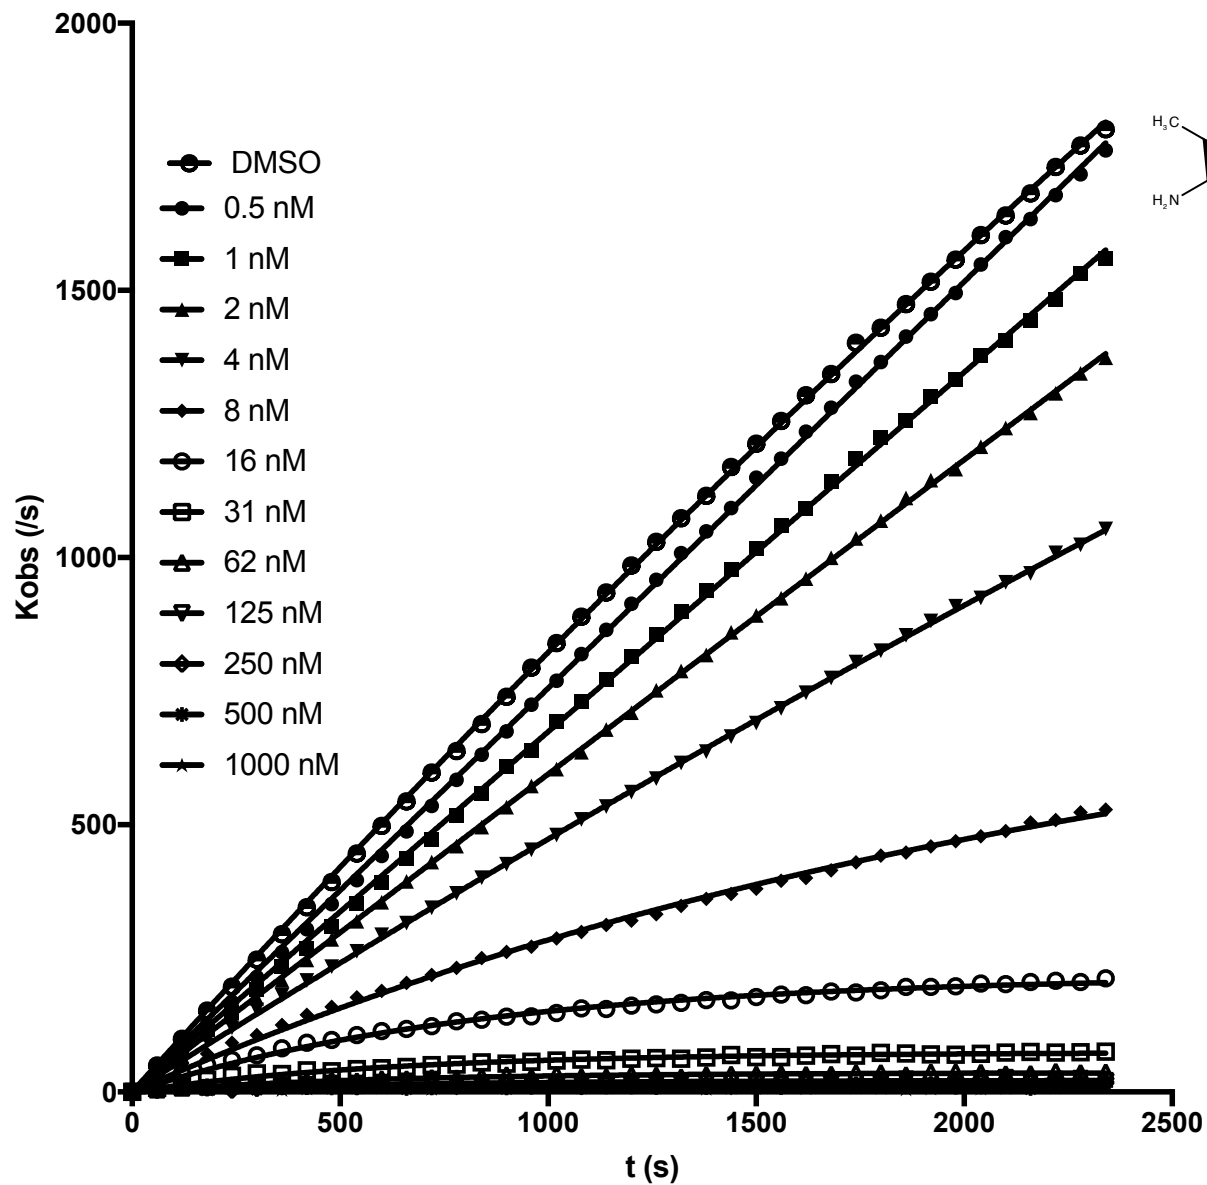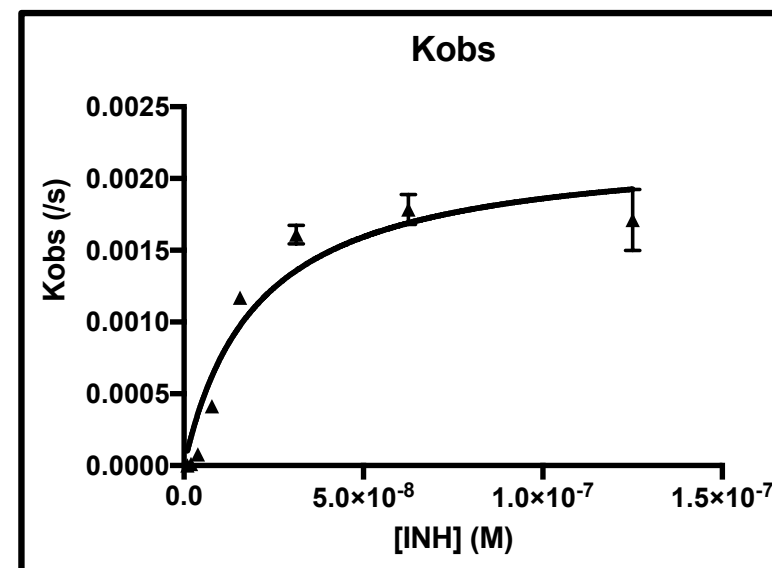

$$k_{\text{inact}} = 0.0022 \pm 0.0003 \text{ s}^{-1}$$
$$K_i = 13.5 \pm 6 \text{ nM}$$
$$K_{\text{inact}}/K_i = 166000 \pm 50000 \text{ M}^{-1}\text{s}^{-1}$$

# P2: Aib

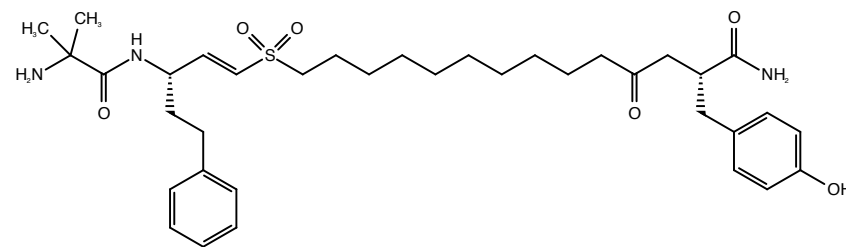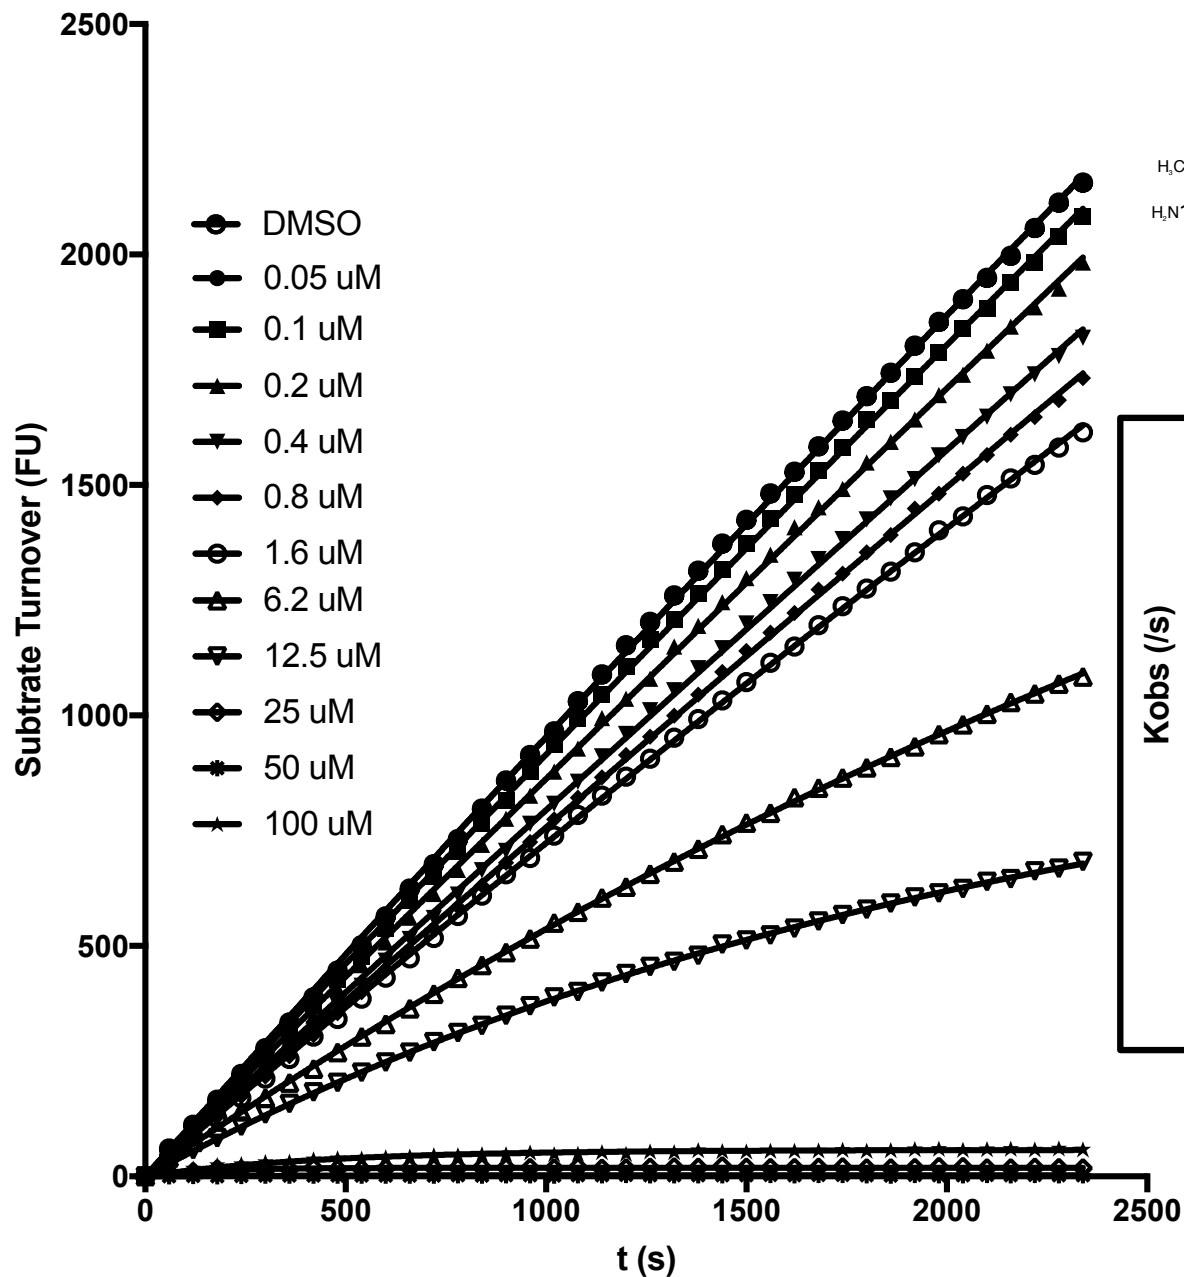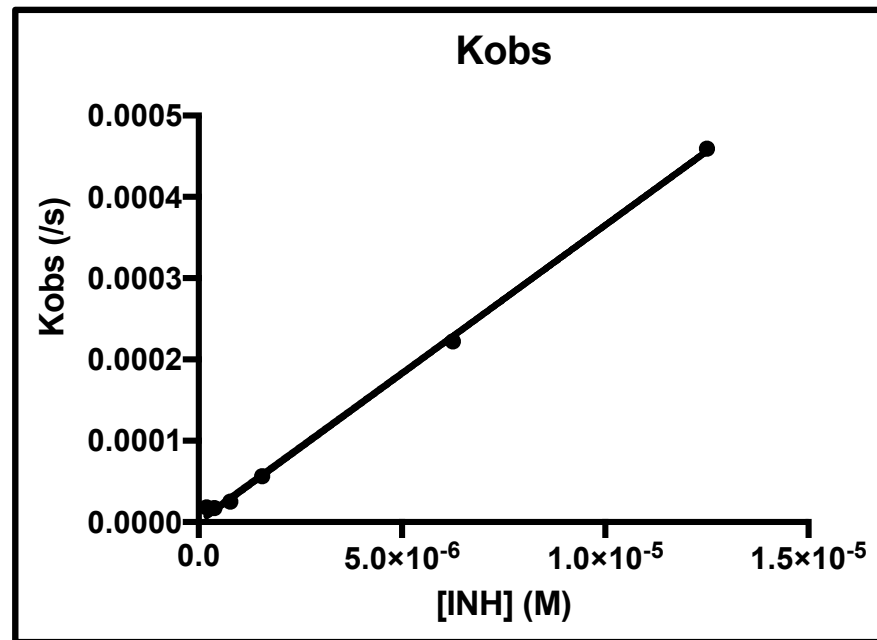

$$k_{\text{inact}} = \text{N/A}$$
$$K_i = \text{N/A}$$
$$K_{\text{inact}}/K_i = 36.3 \pm 0.6 \text{ M}^{-1}\text{s}^{-1}$$

# P2: Val

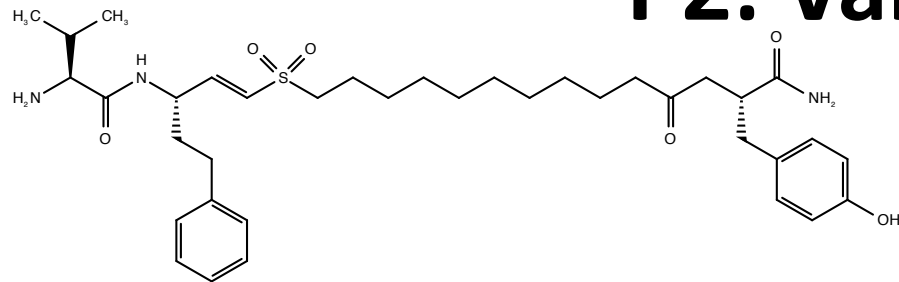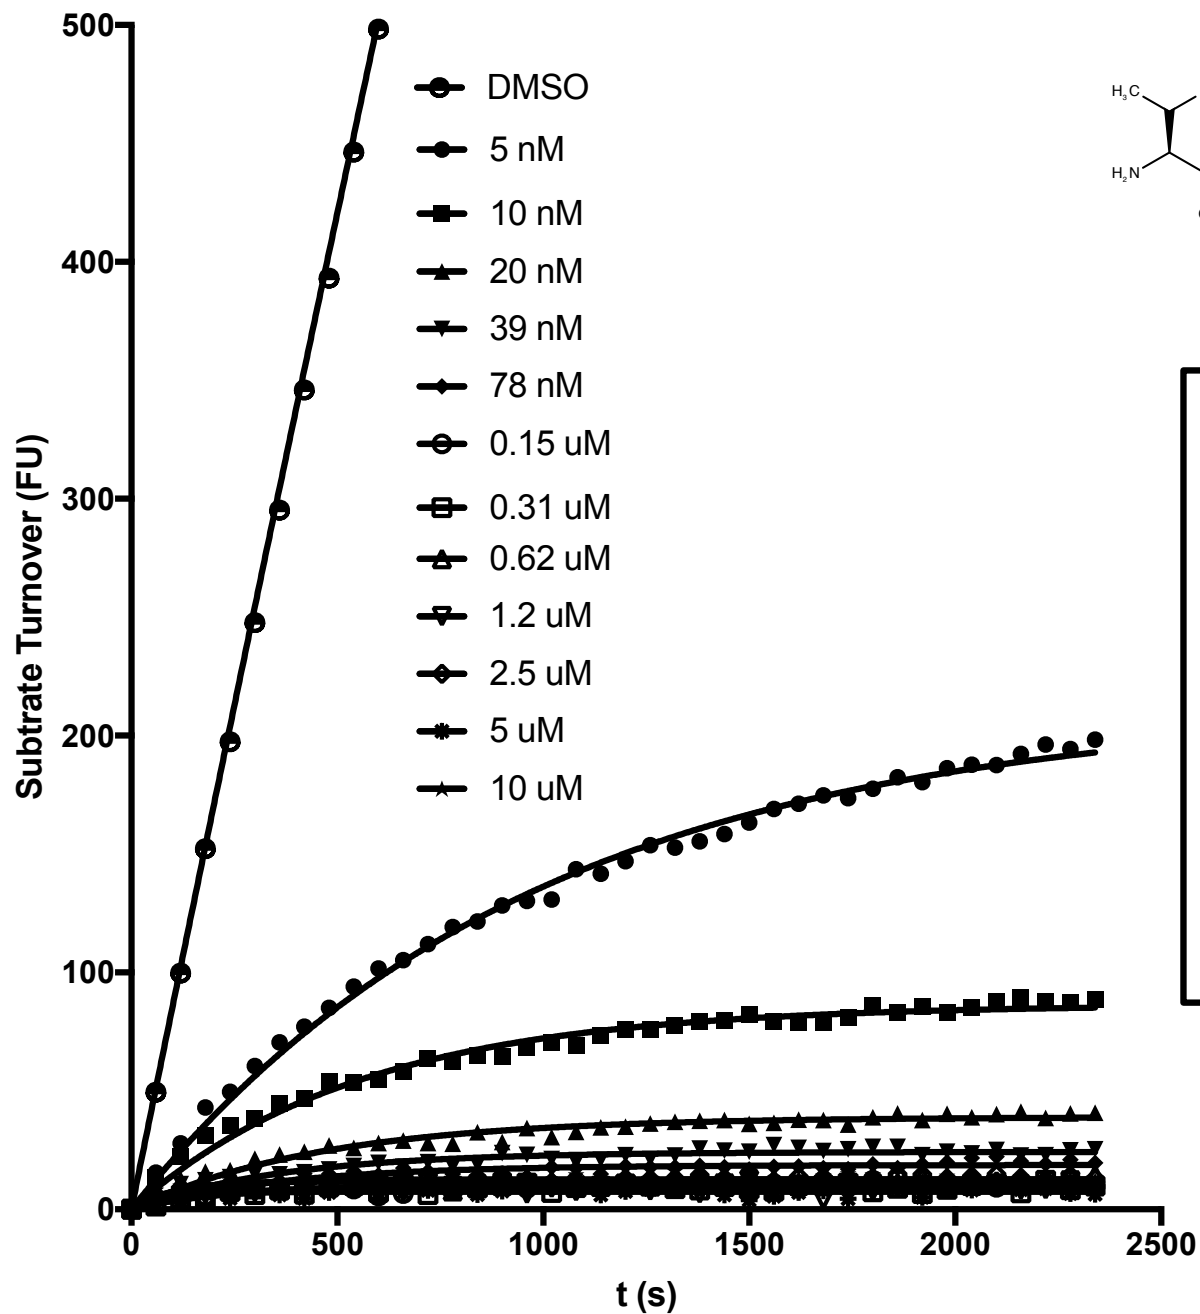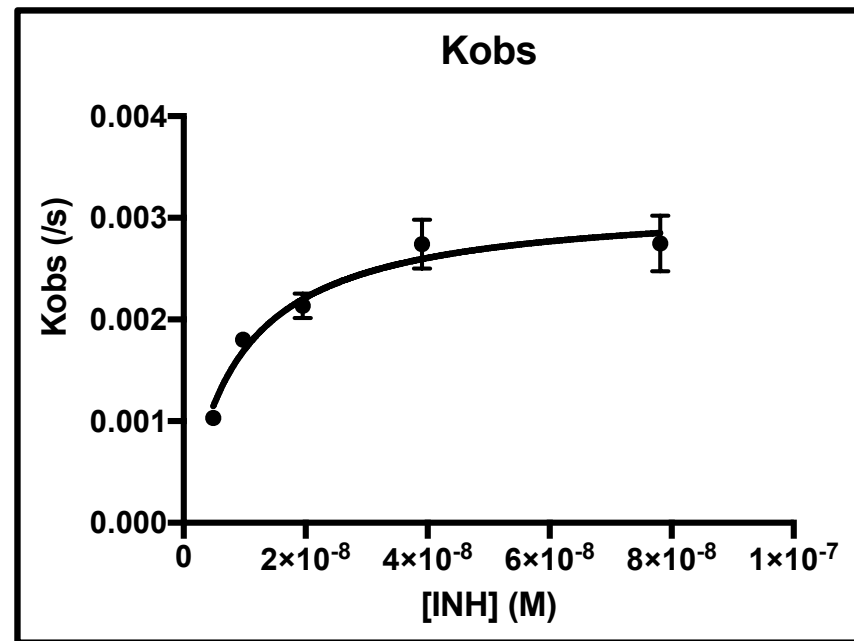

$$k_{\text{inact}} = 0.0032 \pm 0.0002 \text{ s}^{-1}$$
$$K_i = 5.7 \pm 1.1 \text{ nM}$$
$$K_{\text{inact}}/K_i = 554000 \pm 84000 \text{ M}^{-1}\text{s}^{-1}$$

# P2: Ile

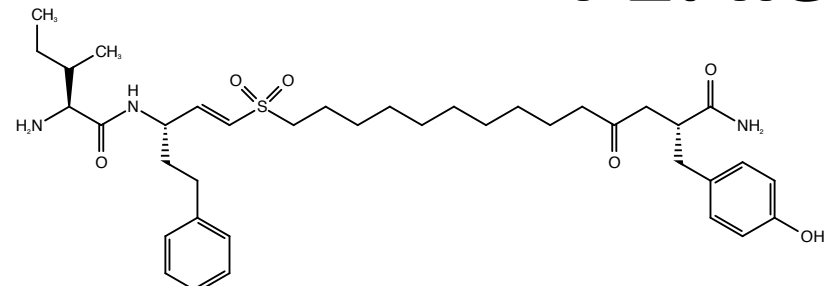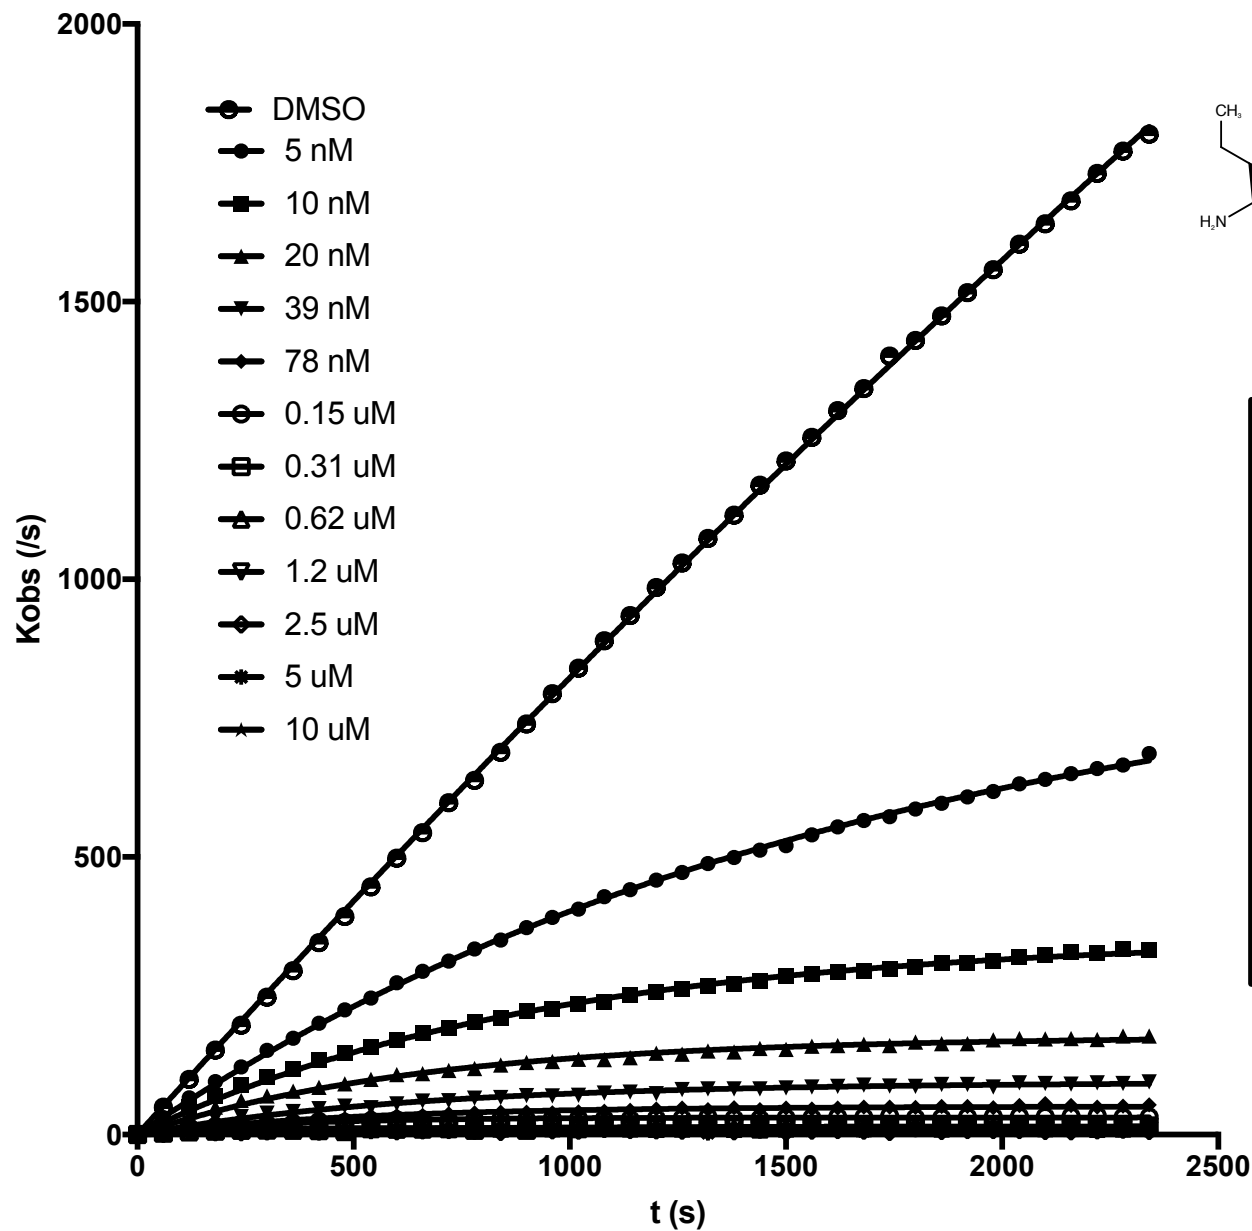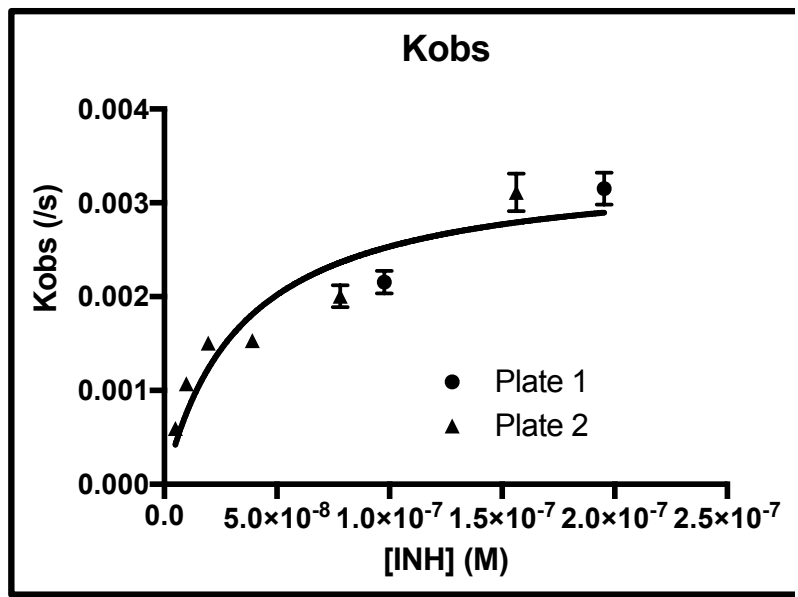

$k_{inact} = 0.0034 \pm 0.0004 \text{ s}^{-1}$   
 $K_i = 23 \pm 9 \text{ nM}$   
 $K_{inact}/K_i = 148400 \pm 44000 \text{ M}^{-1}\text{s}^{-1}$

# P2: Cba

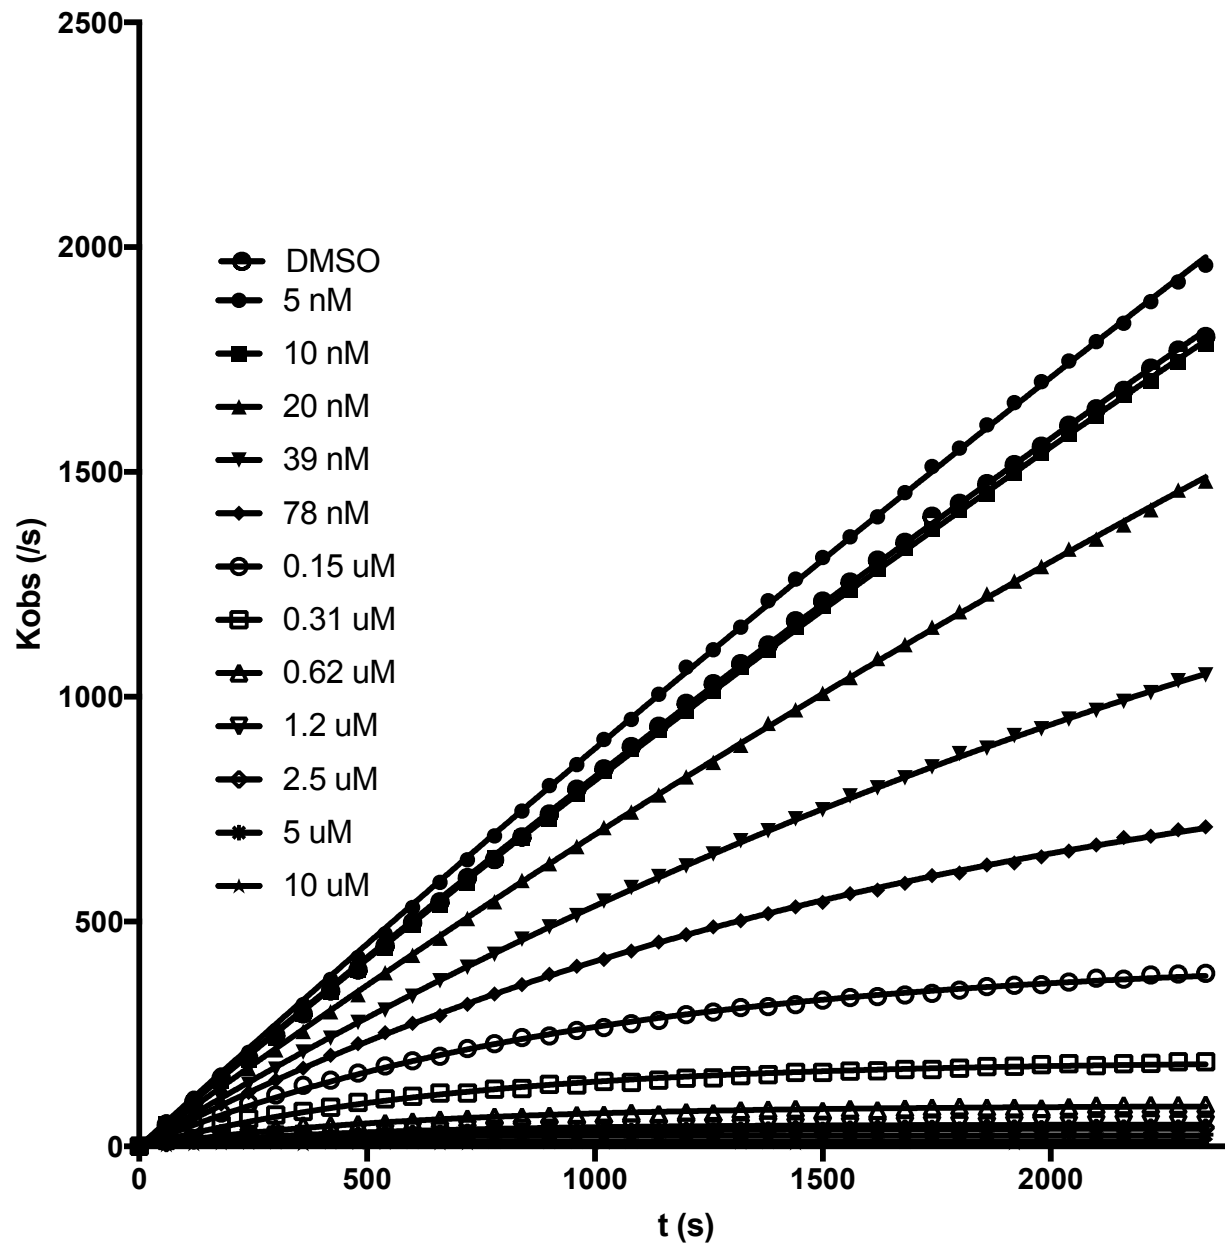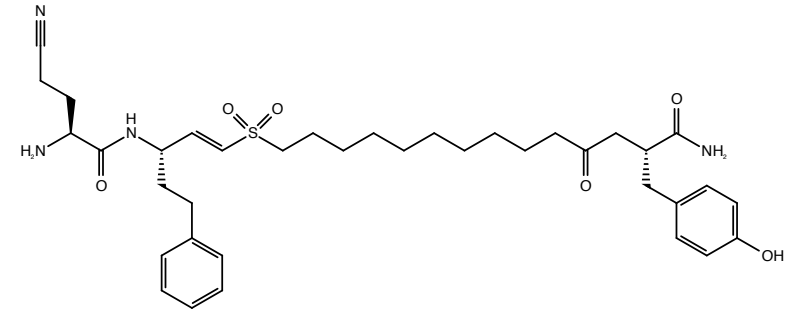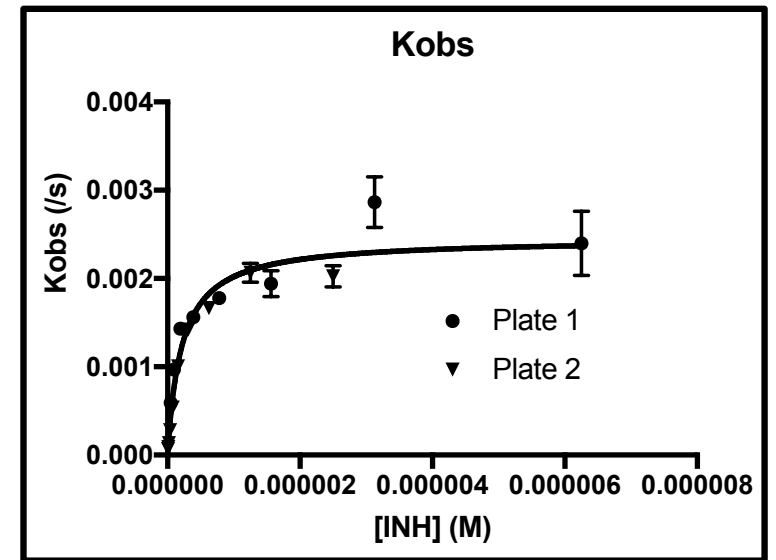

$$k_{\text{inact}} = 0.0025 \pm 0.0001 \text{ s}^{-1}$$

$$K_i = 0.42 \pm 0.03 \text{ } \mu\text{M}$$

$$K_{\text{inact}}/K_i = 17200 \pm 2500 \text{ M}^{-1}\text{s}^{-1}$$



# P2: Thr

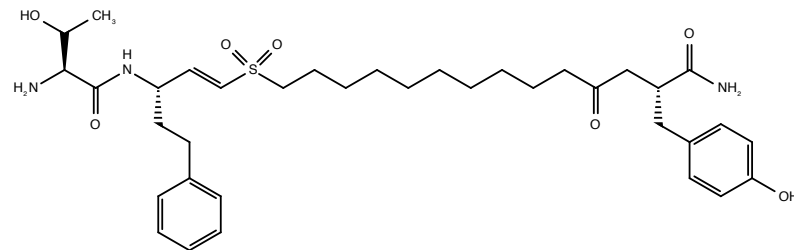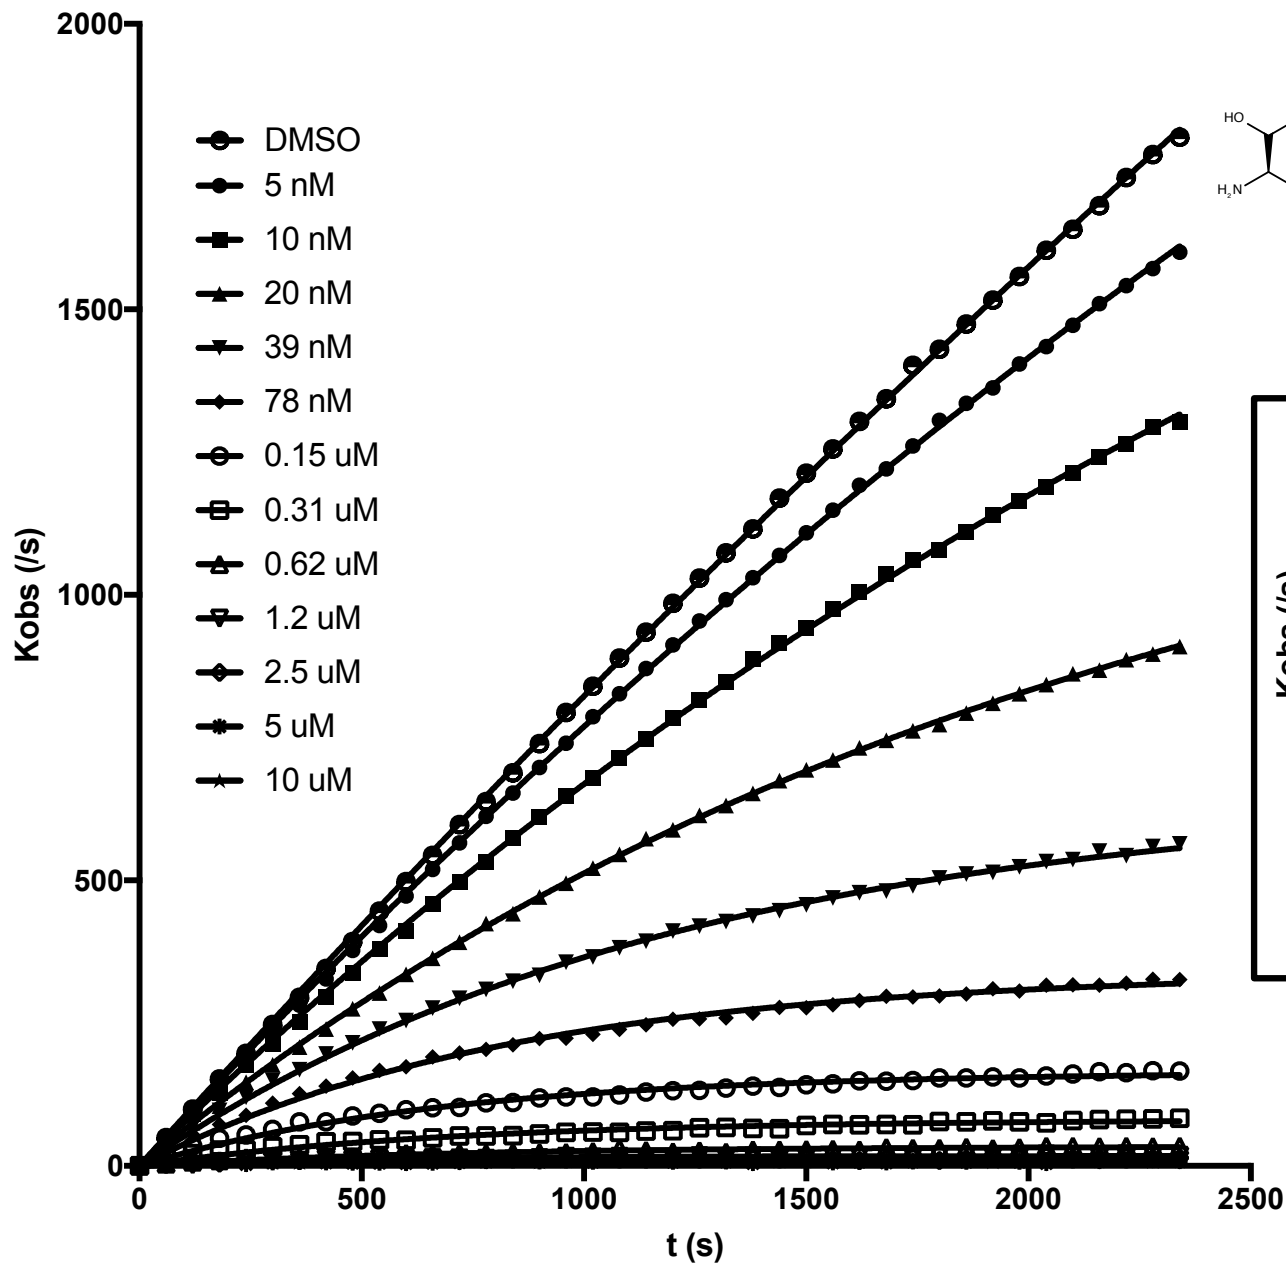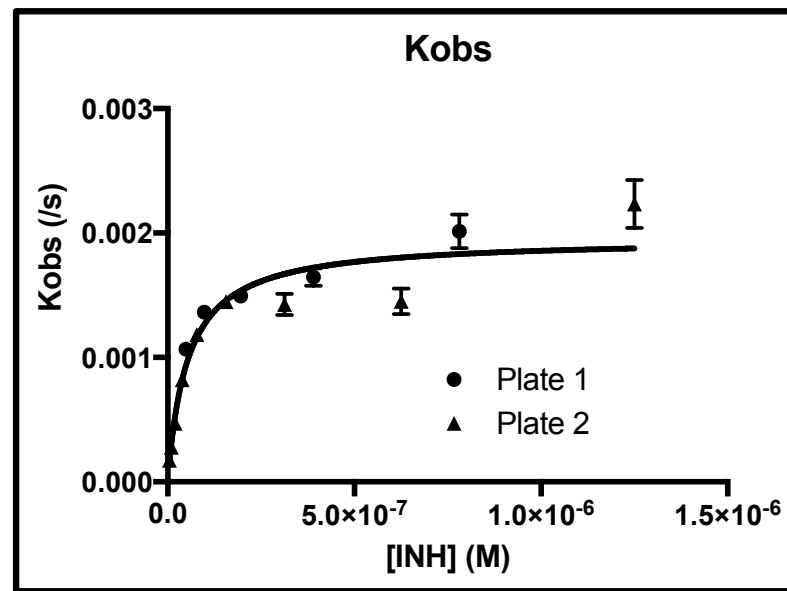

$k_{\text{inact}} = 0.0020 \pm 0.0001 \text{ s}^{-1}$   
 $K_i = 36 \pm 8 \text{ nM}$   
 $K_{\text{inact}}/K_i = 55000 \pm 10000 \text{ M}^{-1}\text{s}^{-1}$

# P2: Asn

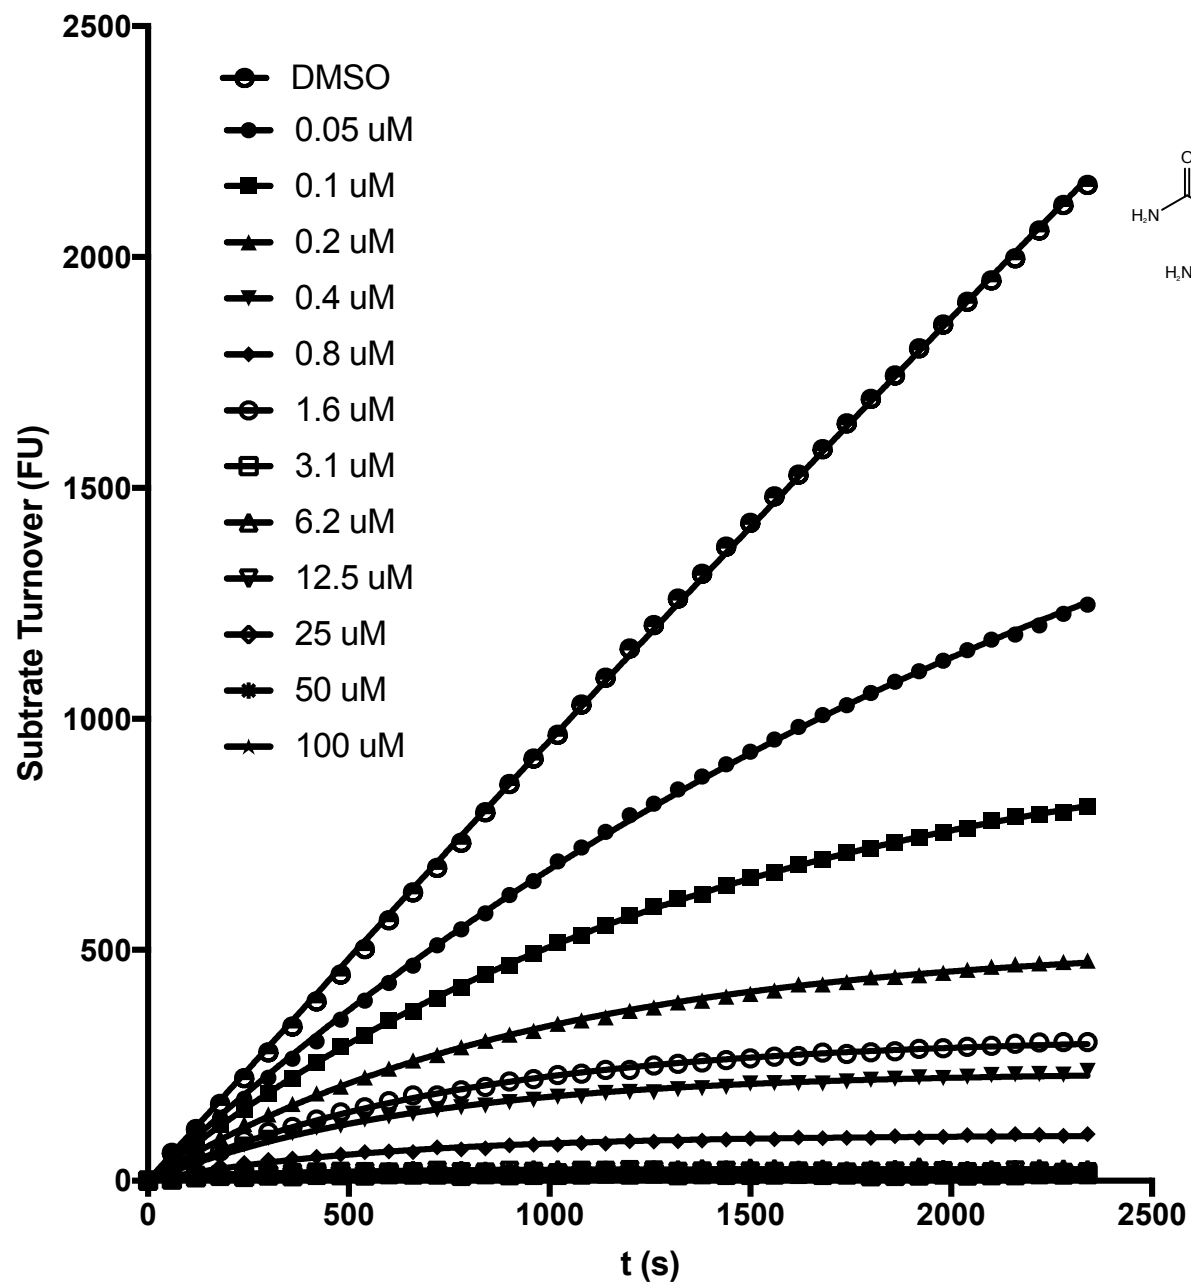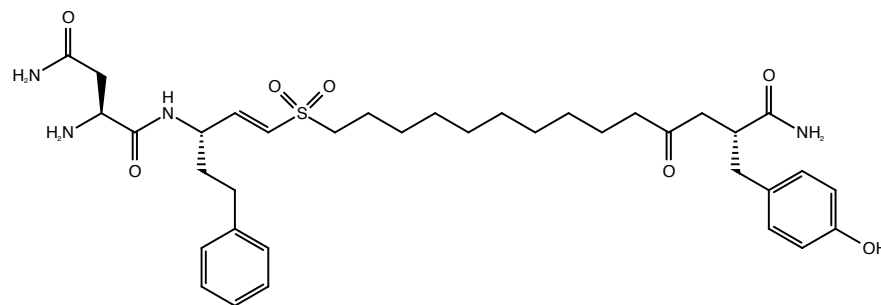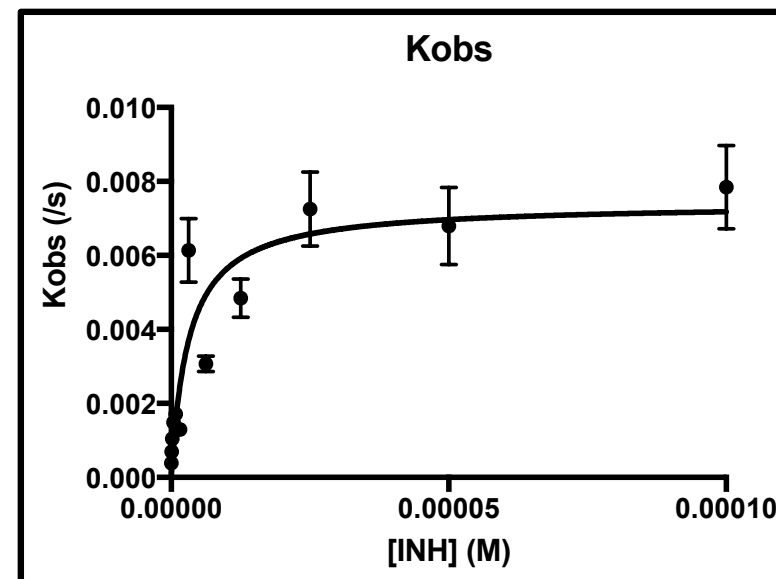

$$k_{\text{inact}} = 0.0074 \pm 0.0008 \text{ s}^{-1}$$
$$K_i = 2.1 \pm 1 \text{ } \mu\text{M}$$
$$K_{\text{inact}}/K_i = 3500 \pm 1400 \text{ M}^{-1}\text{s}^{-1}$$

# P2: Gln

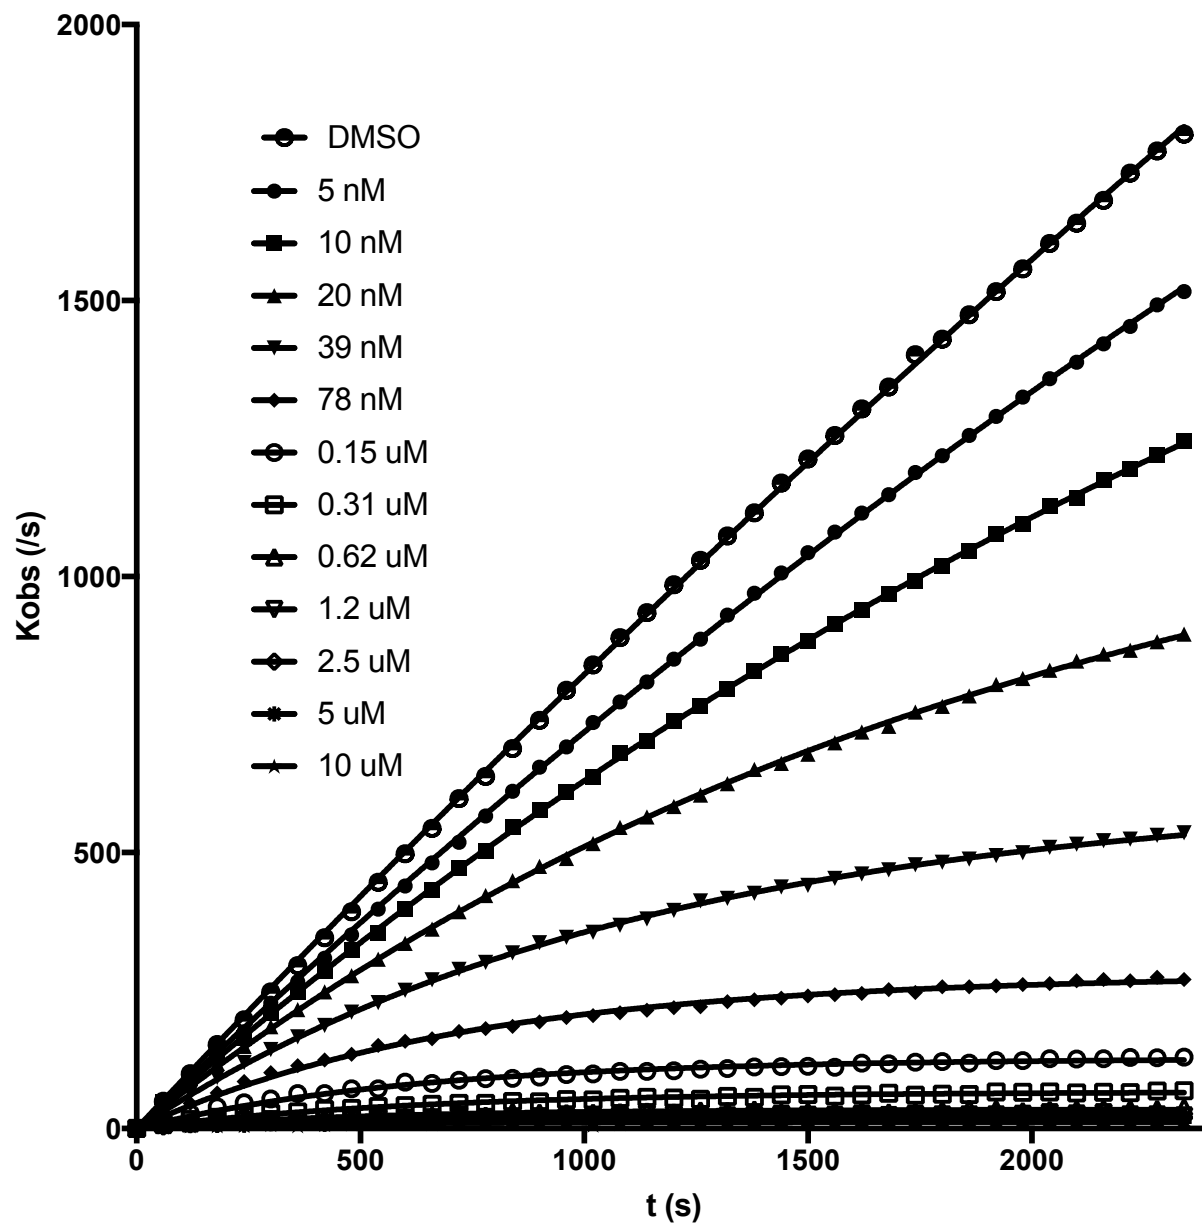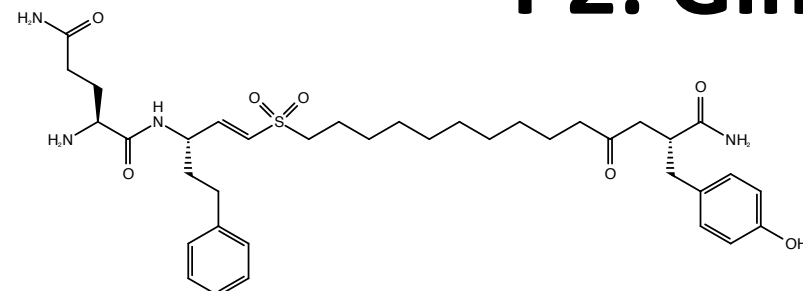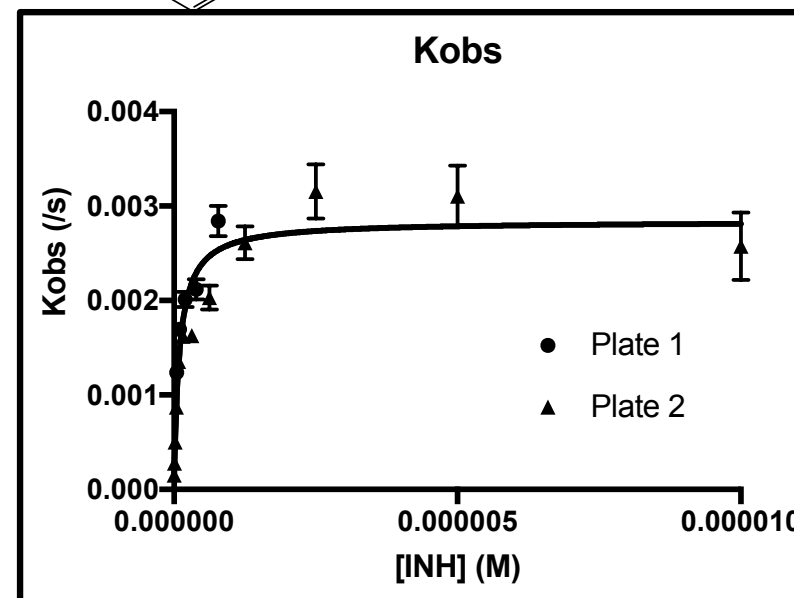

$$k_{\text{inact}} = 0.0028 \pm 0.0001 \text{ s}^{-1}$$
$$K_i = 62 \pm 13 \text{ nM}$$
$$K_{\text{inact}}/K_i = 45600 \pm 7800 \text{ M}^{-1}\text{s}^{-1}$$

# P2: Asp

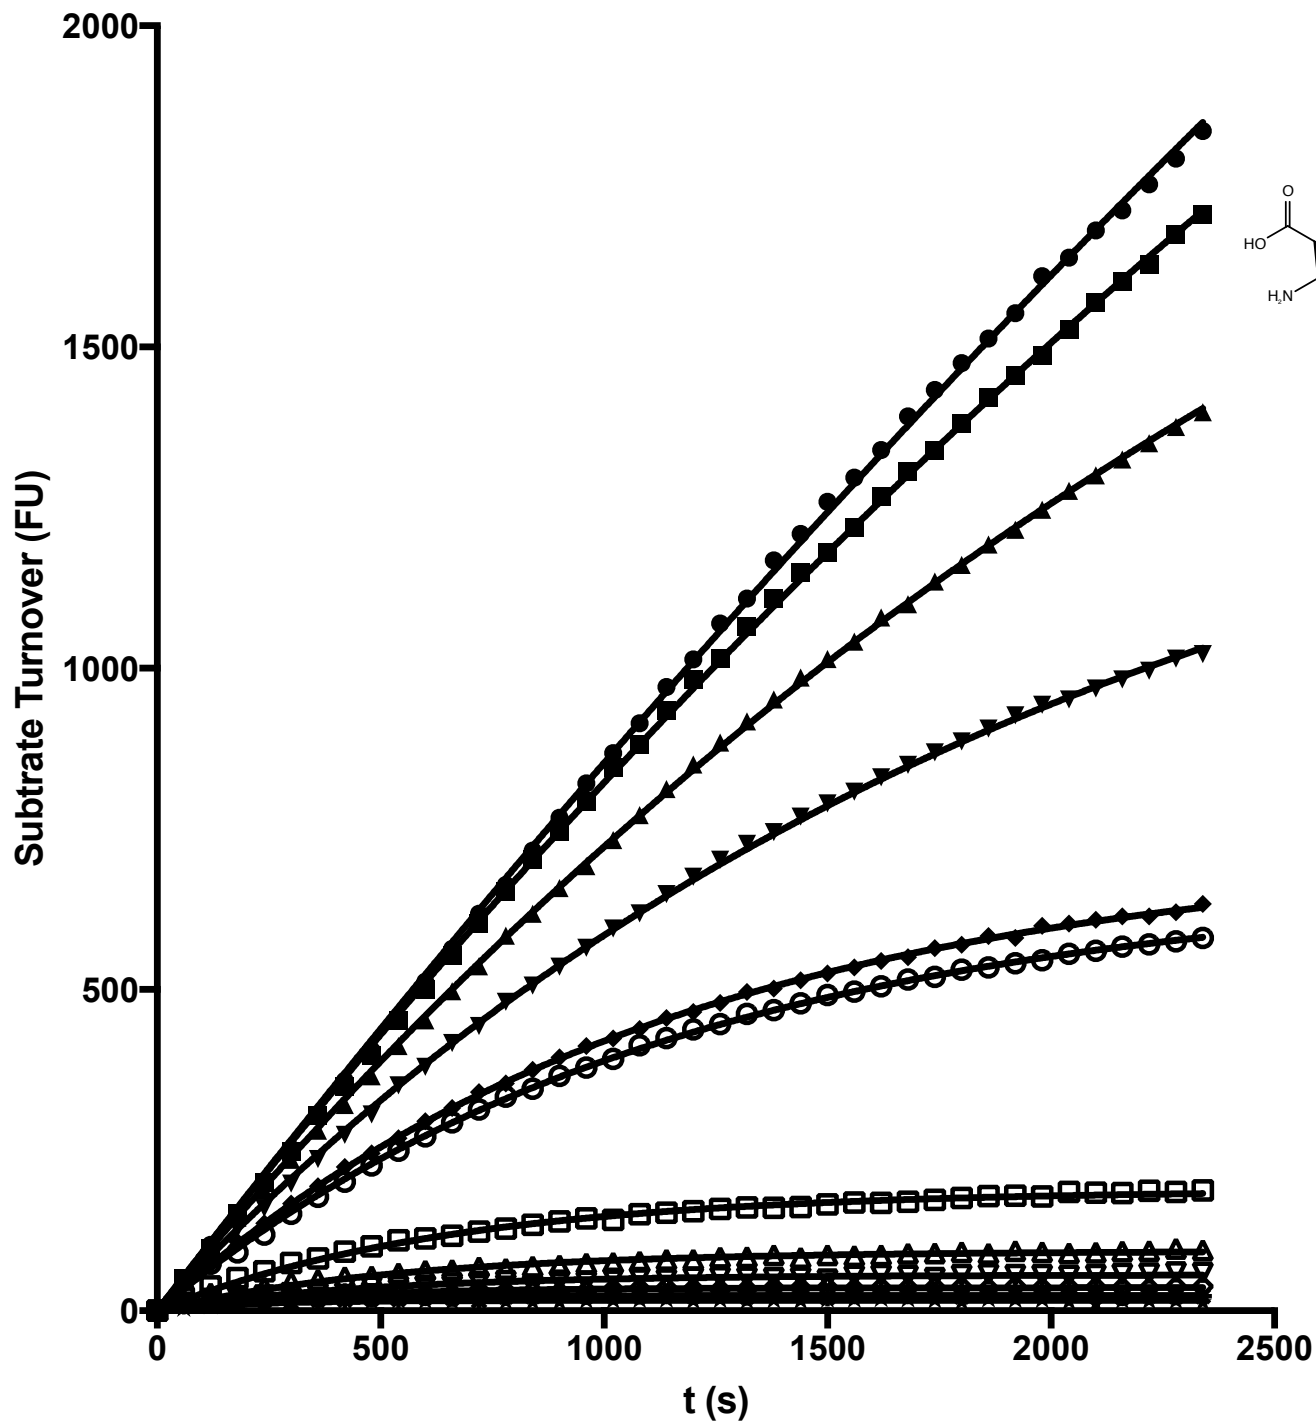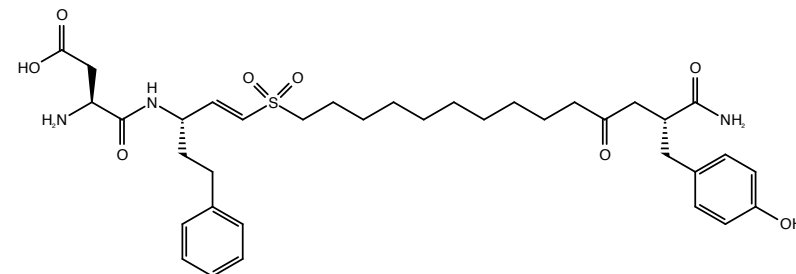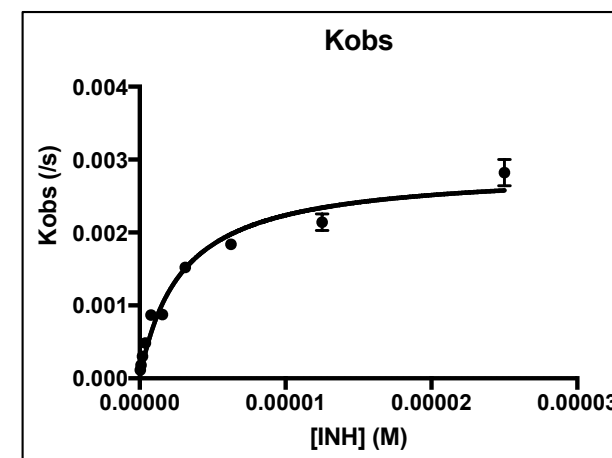

$$k_{\text{inact}} = 0.0029 \pm 0.0002 \text{ s}^{-1}$$
$$K_i = 1.9 \pm 0.4 \text{ } \mu\text{M}$$
$$K_{\text{inact}}/K_i = 1530 \pm 250 \text{ M}^{-1}\text{s}^{-1}$$

# P2: Glu

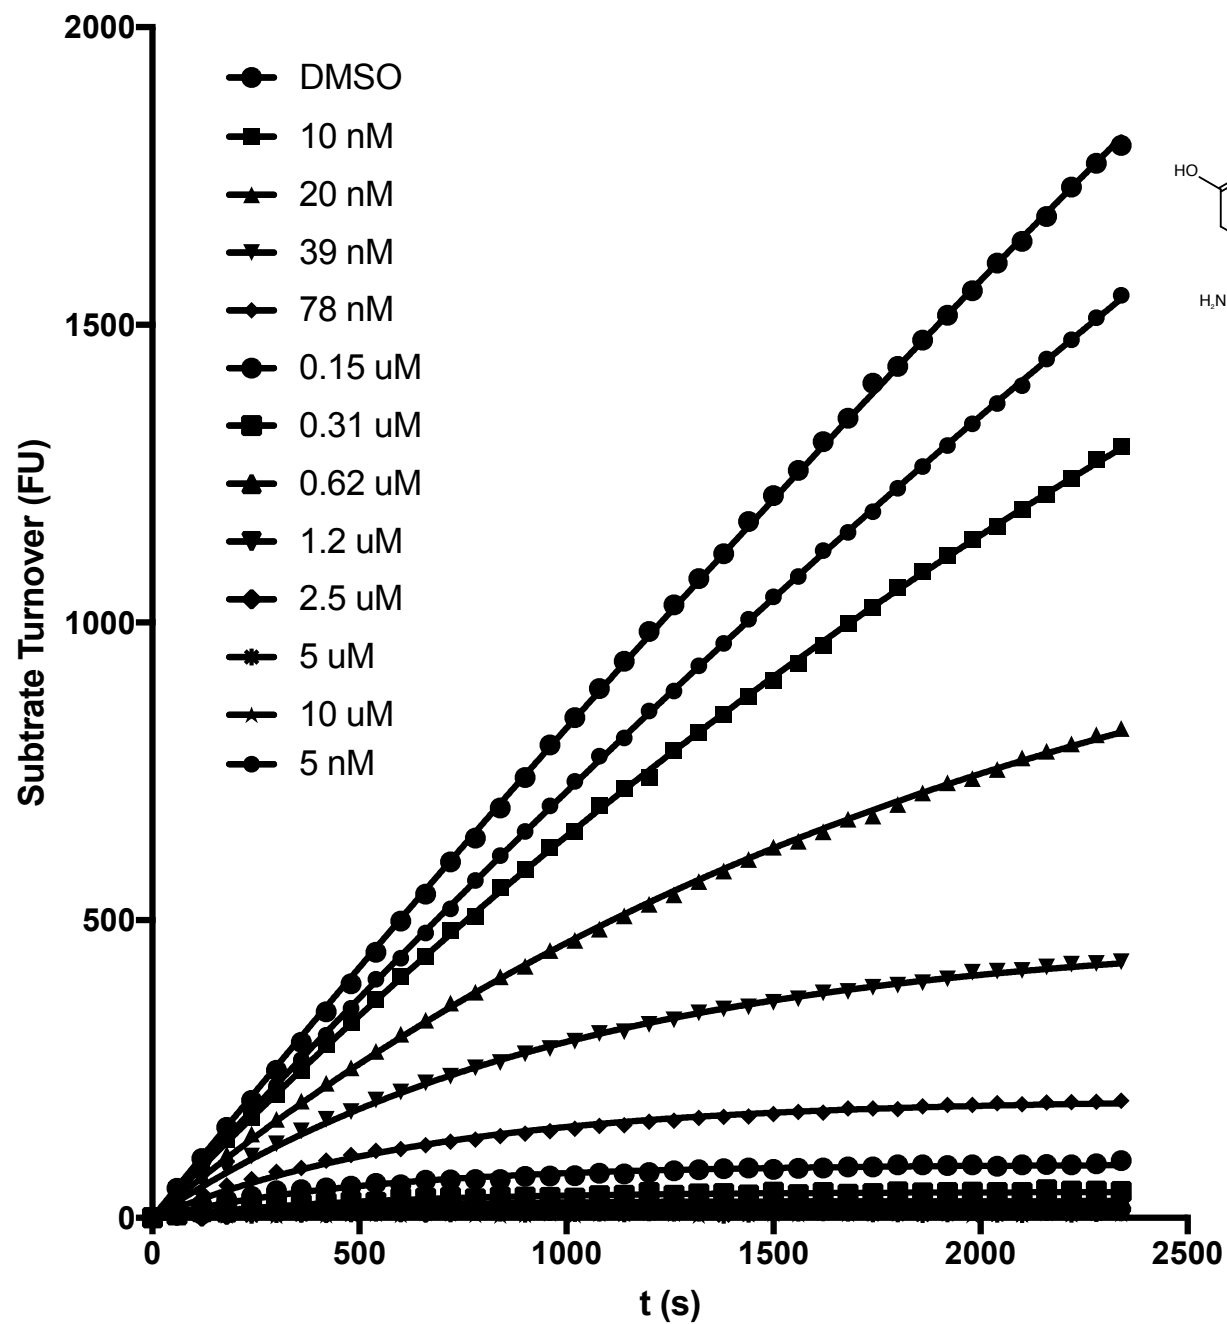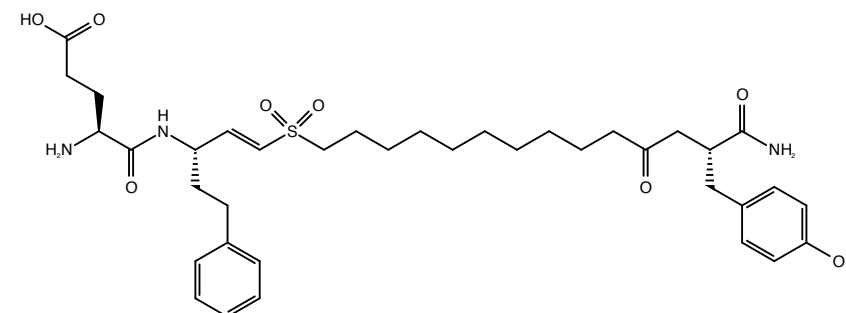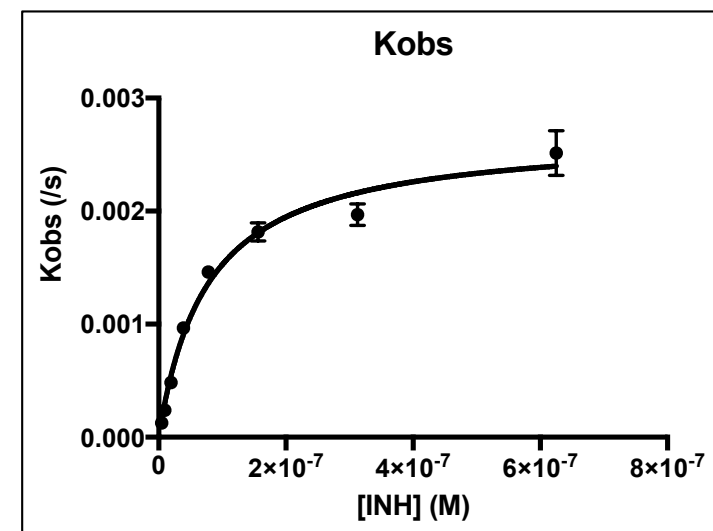

$$k_{\text{inact}} = 0.0027 \pm 0.0001 \text{ s}^{-1}$$
$$K_i = 51 \pm 8 \text{ nM}$$
$$K_{\text{inact}}/K_i = 53000 \pm 6000 \text{ M}^{-1}\text{s}^{-1}$$

# P2: His

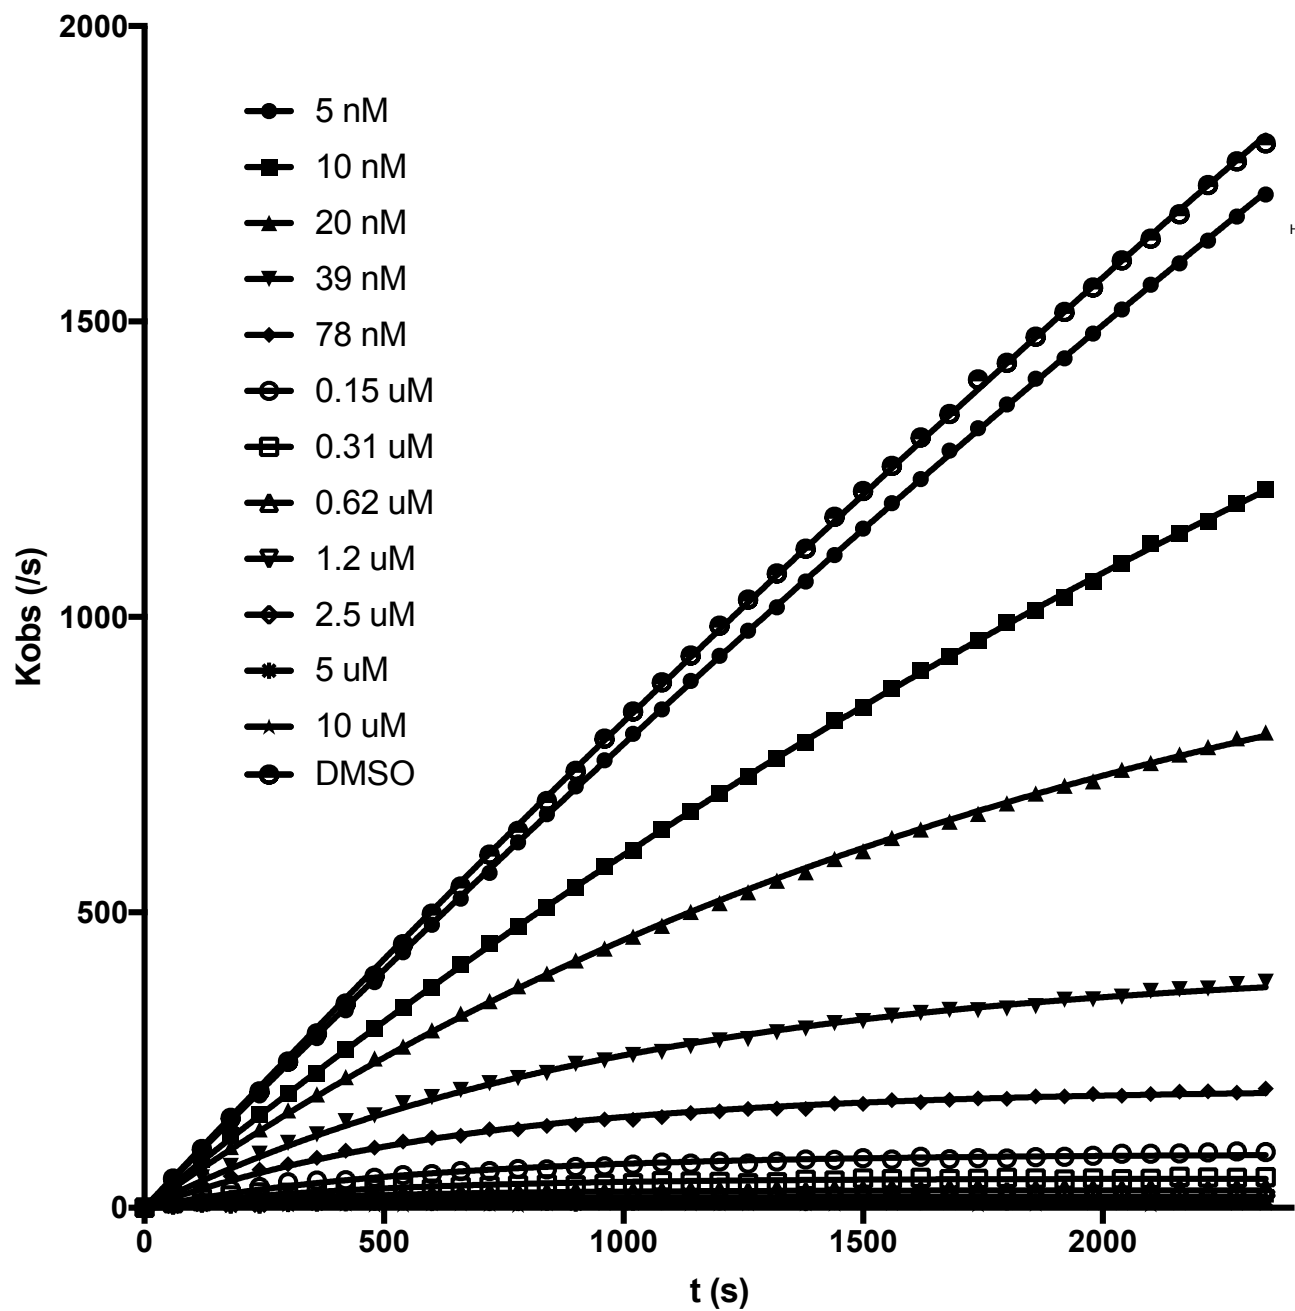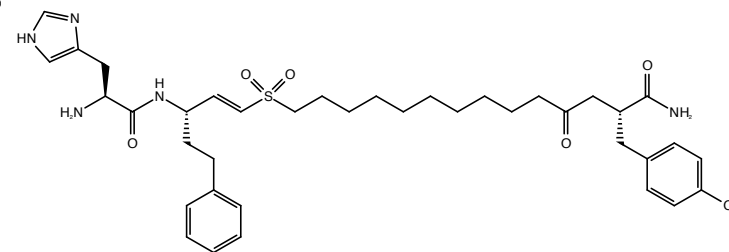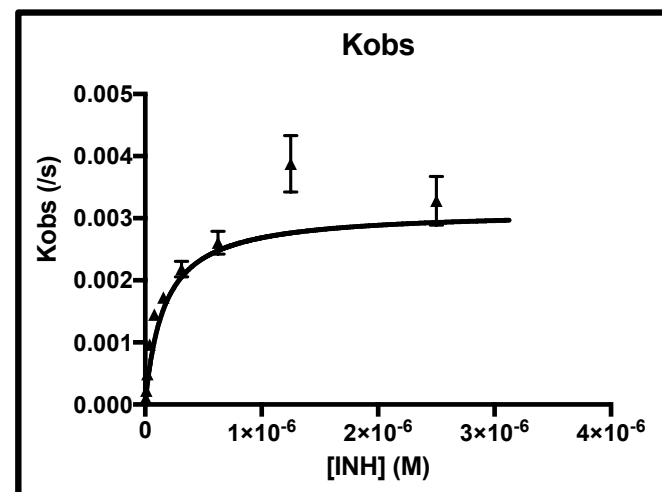

$$k_{\text{inact}} = 0.0031 \pm 0.0003 \text{ s}^{-1}$$
$$K_i = 110 \pm 35 \text{ nM}$$
$$K_{\text{inact}}/K_i = 28700 \pm 7600 \text{ M}^{-1}\text{s}^{-1}$$

# P2: Lys

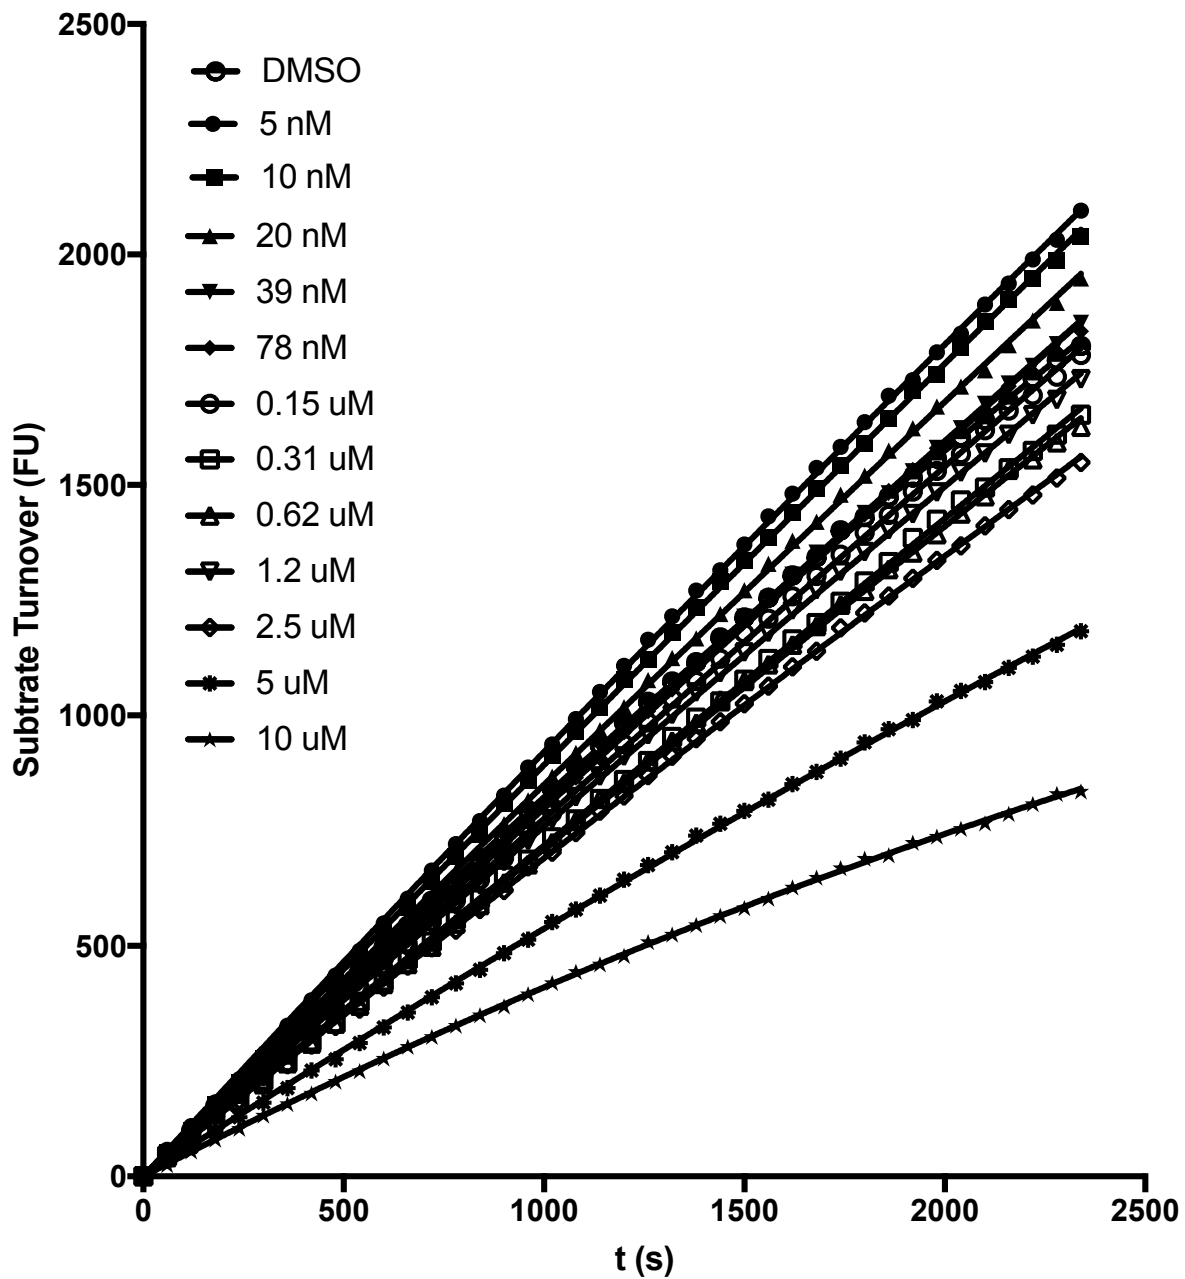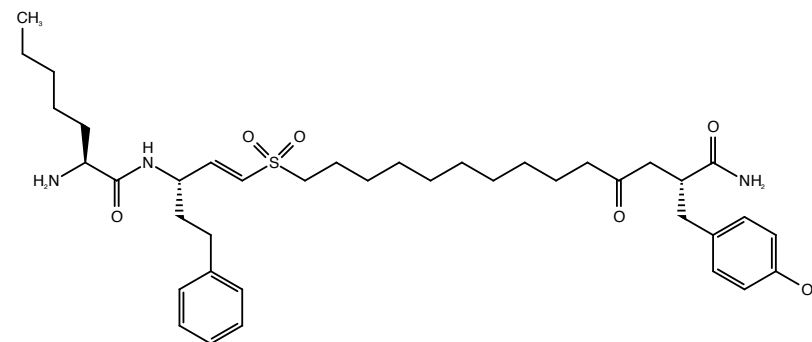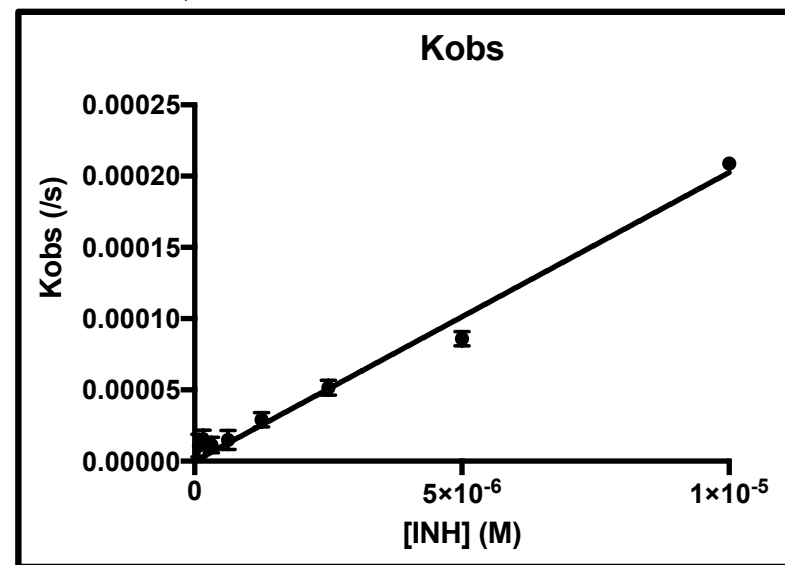

$$K_{inact}/K_i = 20 \pm 1 \text{ M}^{-1}\text{s}^{-1}$$

# P2: Arg

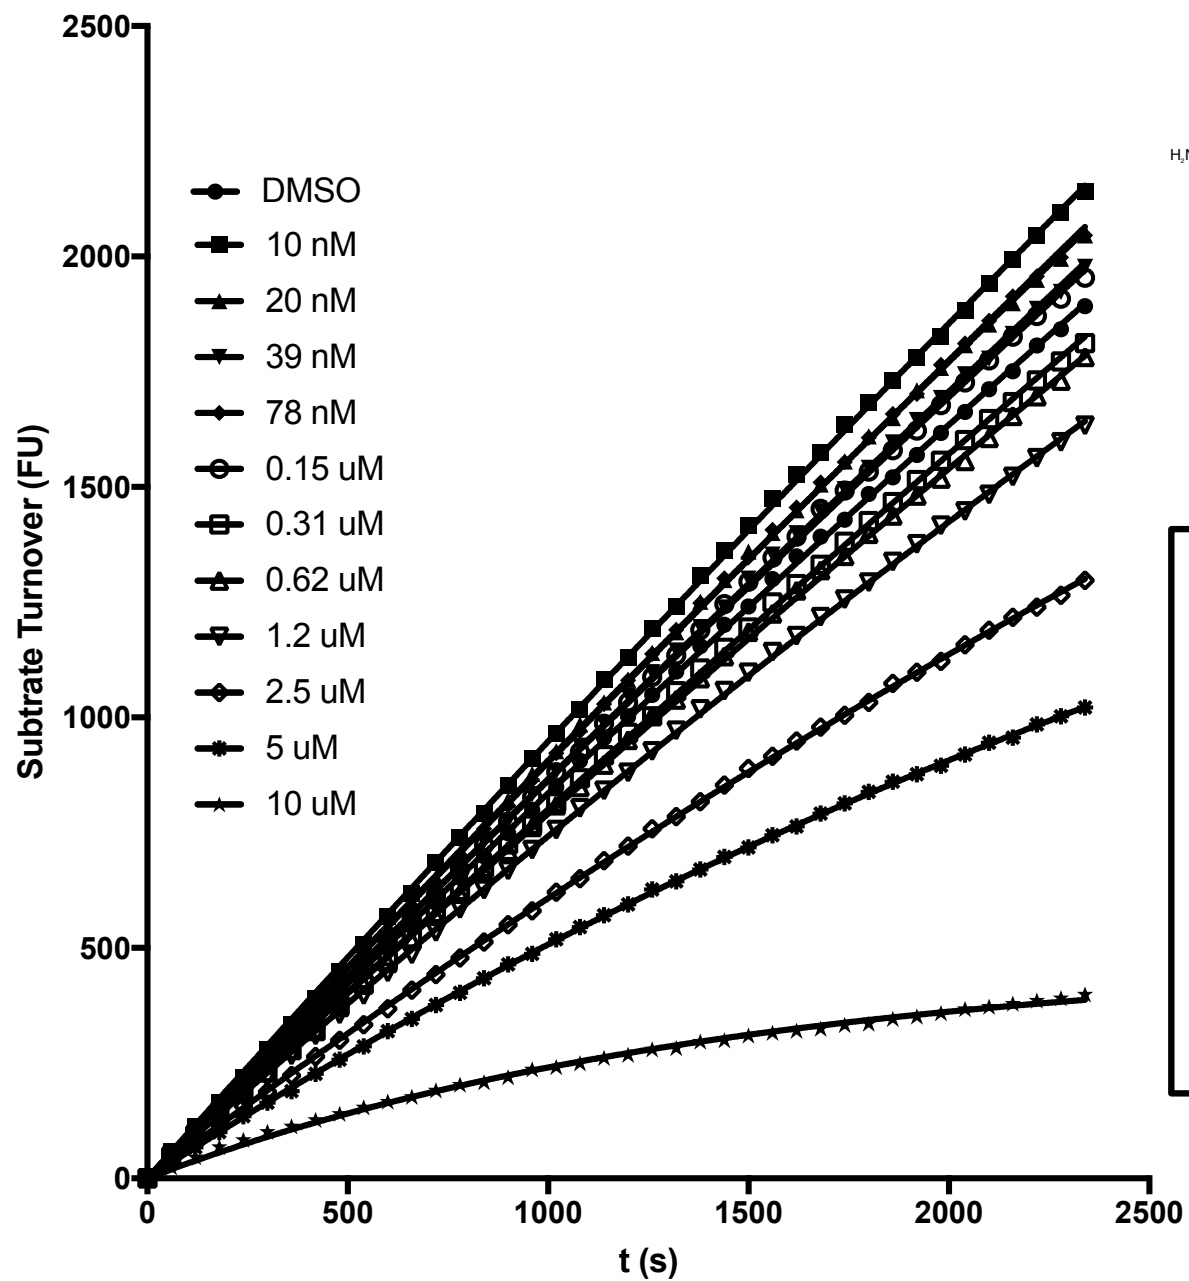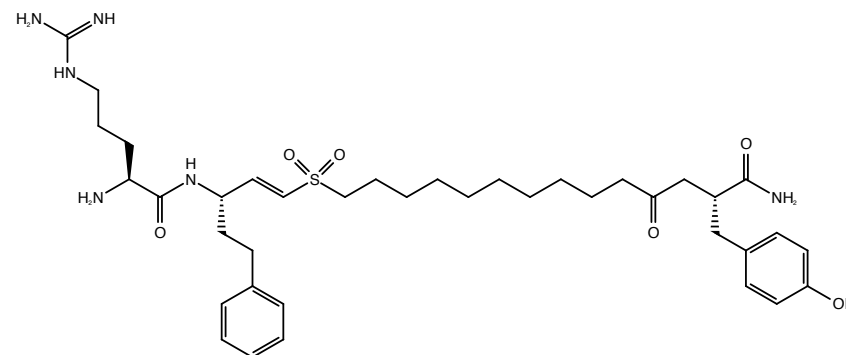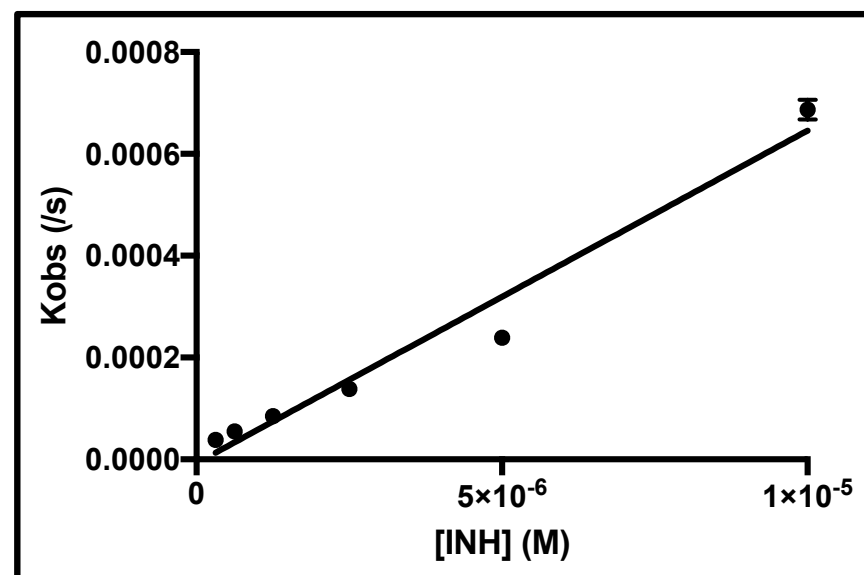

$$K_{\text{inact}}/K_i = 65 \pm 6 \text{ M}^{-1}\text{s}^{-1}$$



# P2: Phg

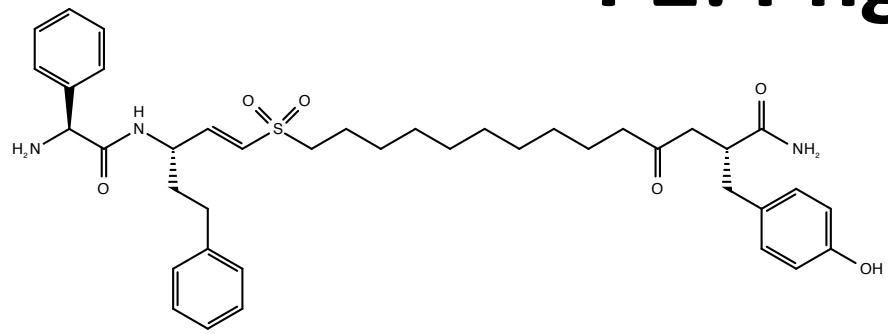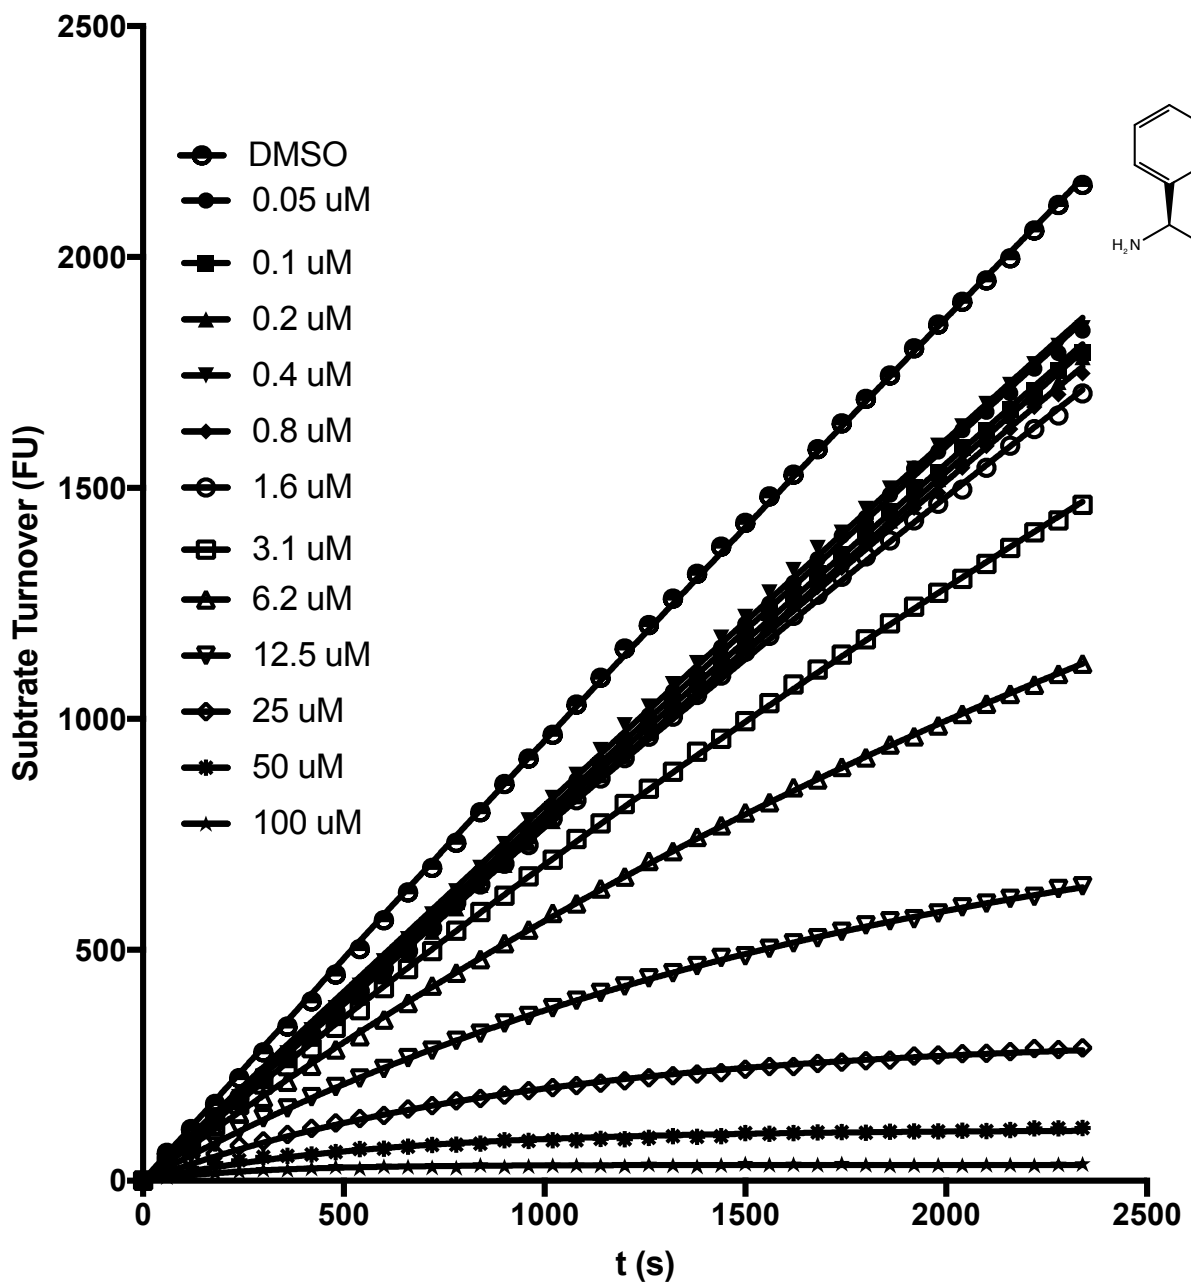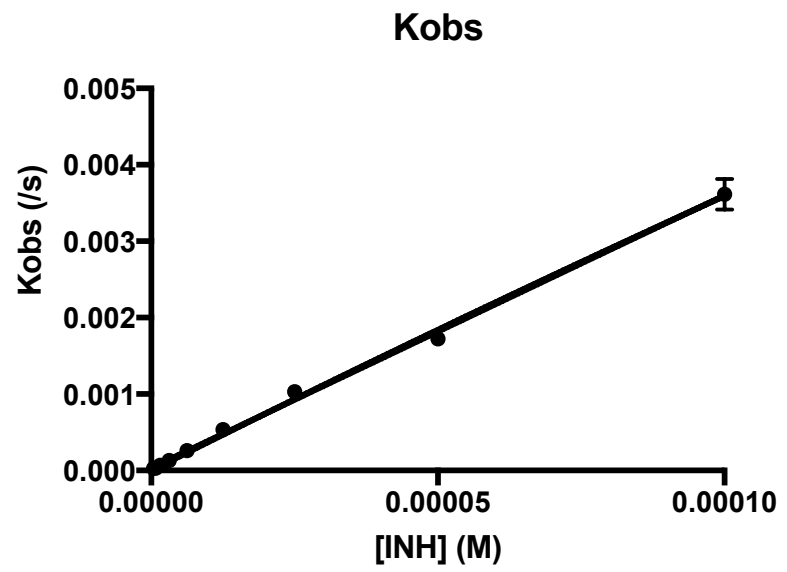

$$K_{inact}/K_i = 35.7 \pm 0.7 \text{ M}^{-1}\text{s}^{-1}$$

# P2: 2fa

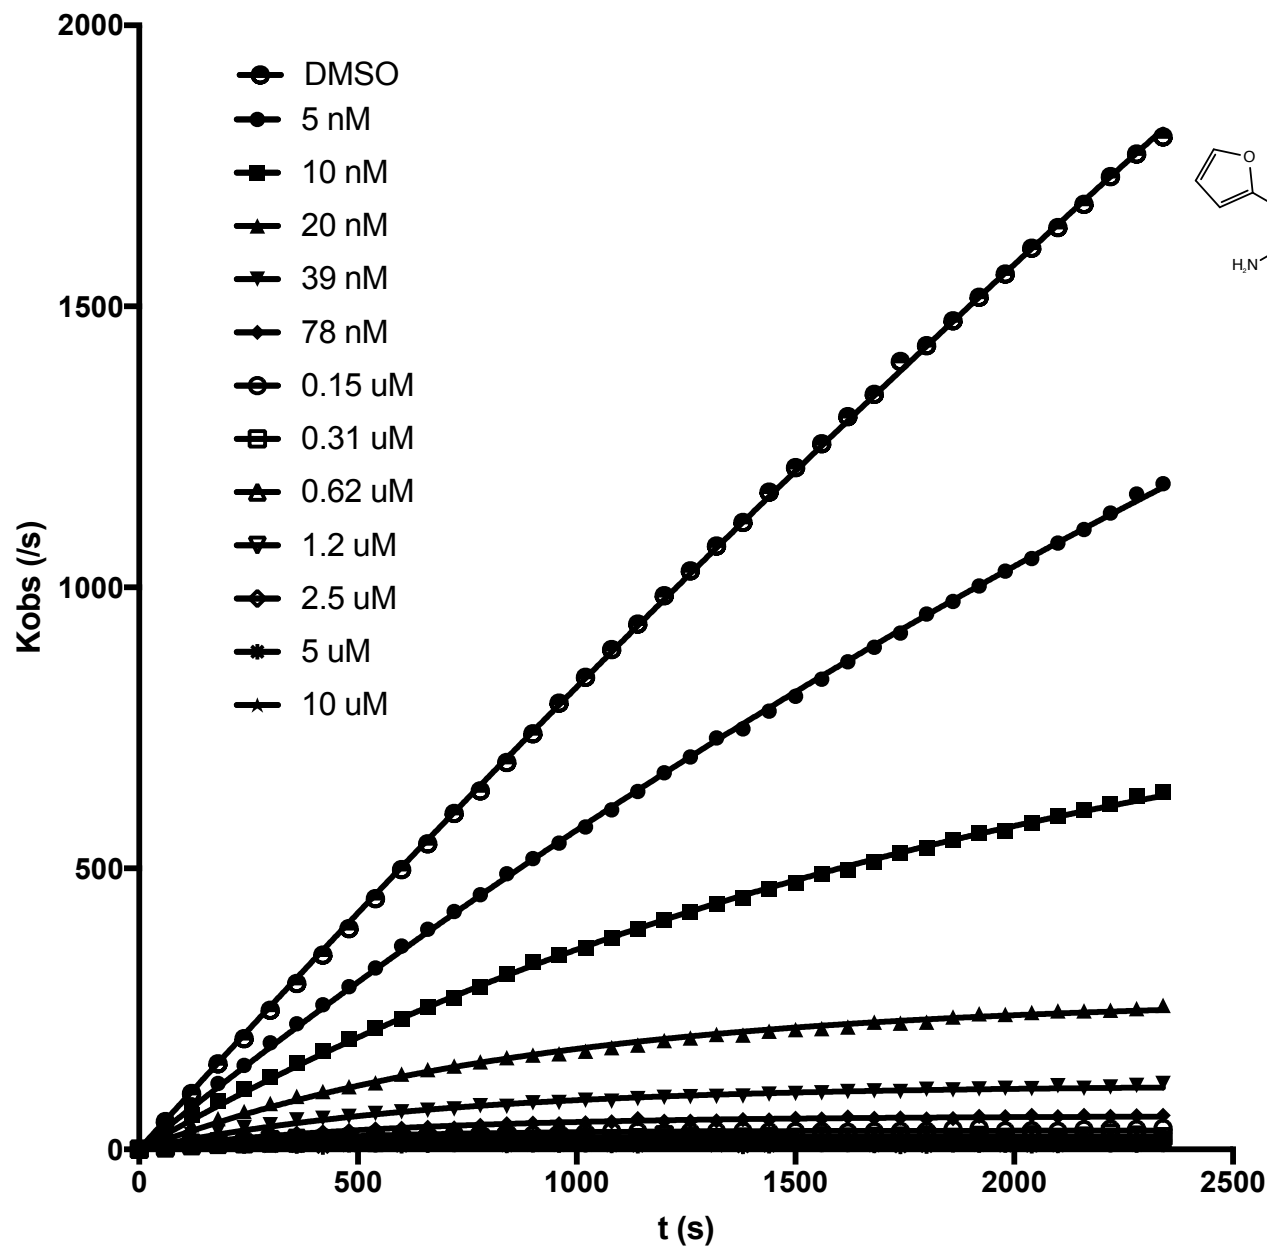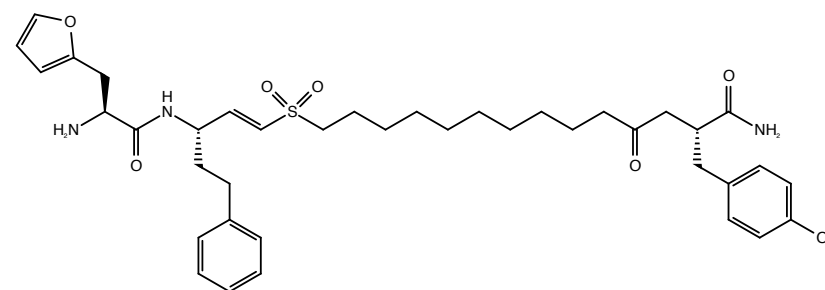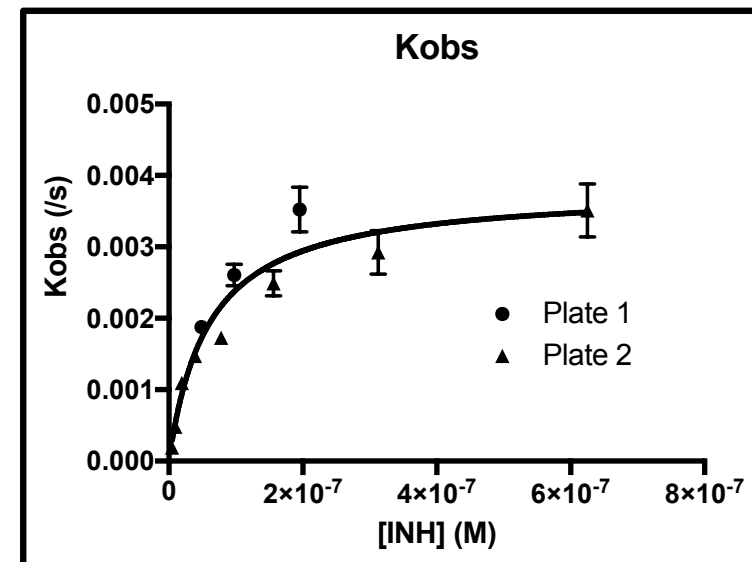

$$k_{\text{inact}} = 0.00378 \pm 0.0003 \text{ s}^{-1}$$
$$K_i = 39 \pm 10 \text{ nM}$$
$$K_{\text{inact}}/K_i = 96700 \pm 17500 \text{ M}^{-1}\text{s}^{-1}$$

# P2: 2ta

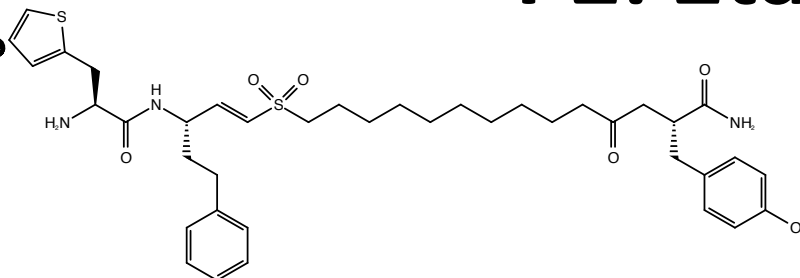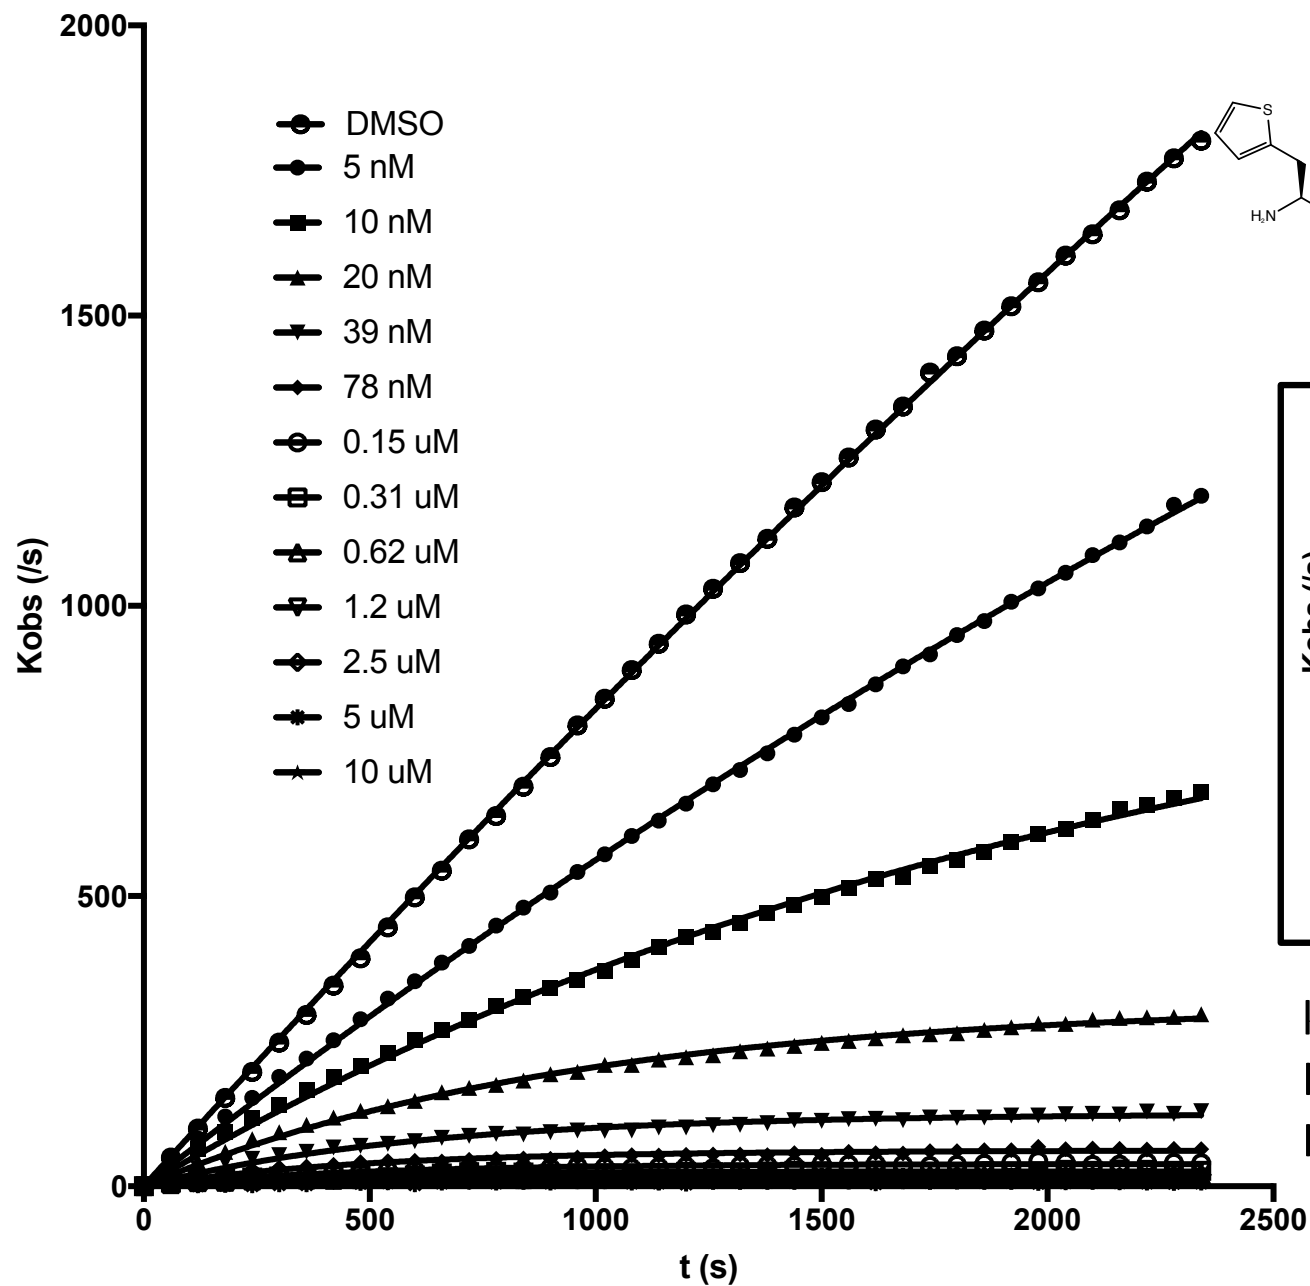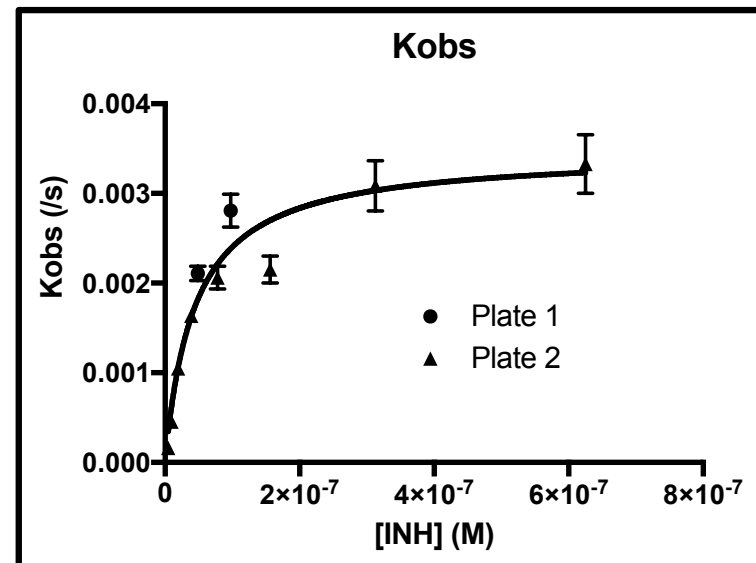

$k_{\text{inact}} = 0.0034 \pm 0.0003 \text{ s}^{-1}$   
 $K_i = 29 \pm 7 \text{ nM}$   
 $K_{\text{inact}}/K_i = 118000 \pm 22500 \text{ M}^{-1}\text{s}^{-1}$

# P2: Cha

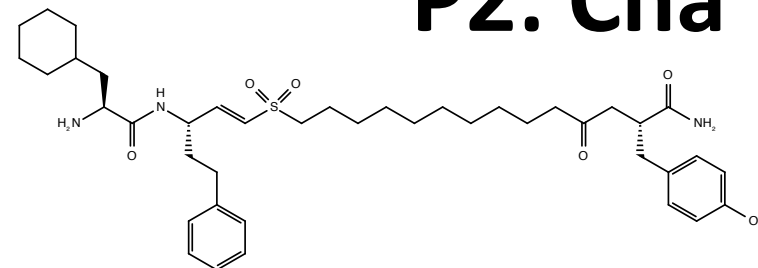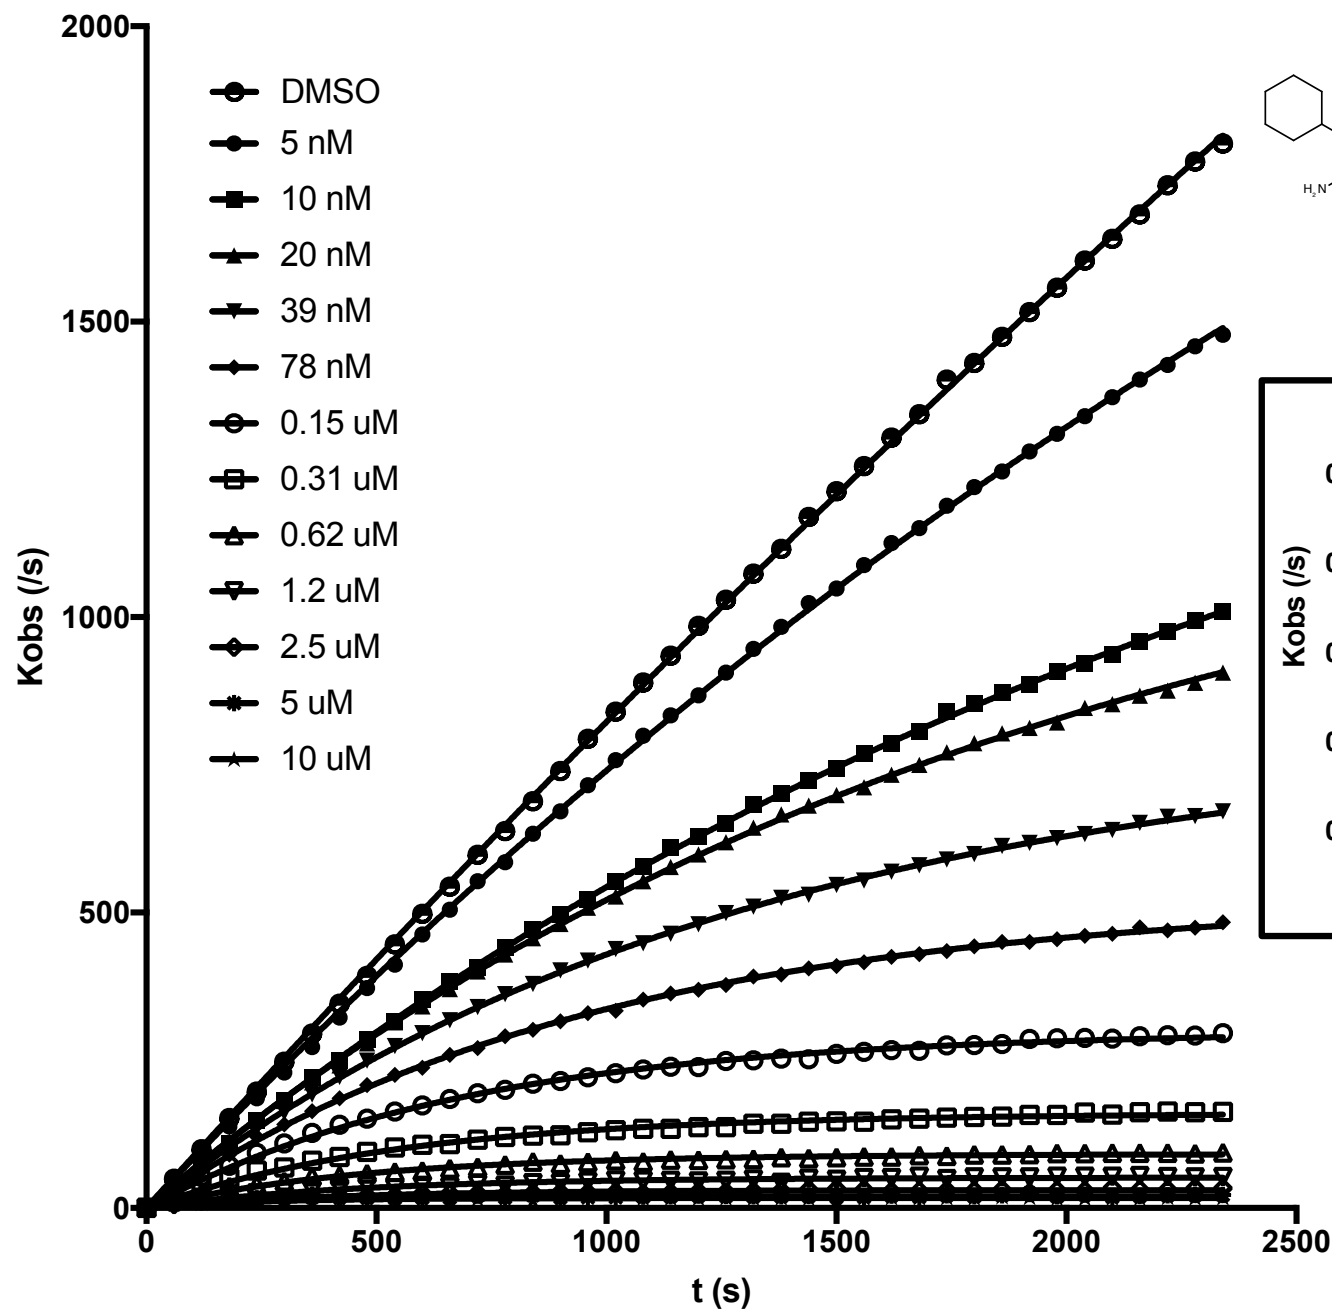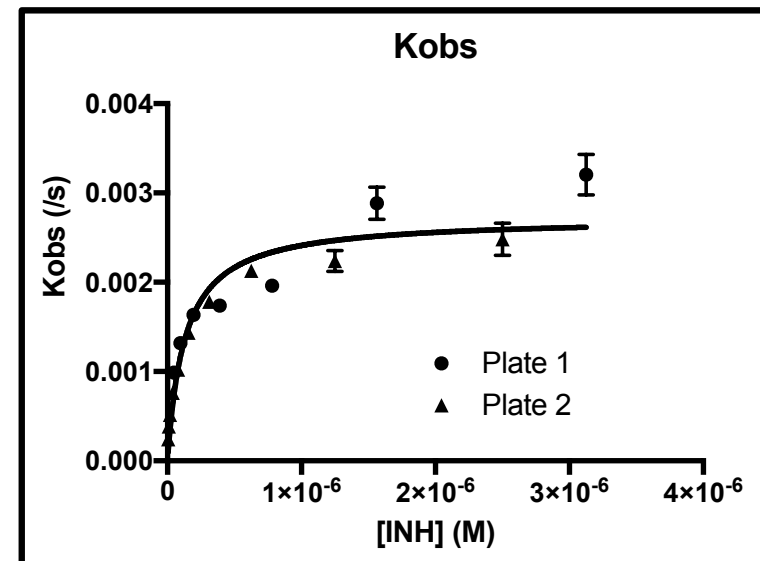

$$k_{\text{inact}} = 0.0027 \pm 0.0002 \text{ s}^{-1}$$
$$K_i = 86 \pm 18 \text{ nM}$$
$$K_{\text{inact}}/K_i = 31600 \pm 5500 \text{ M}^{-1}\text{s}^{-1}$$

# P2: Phe

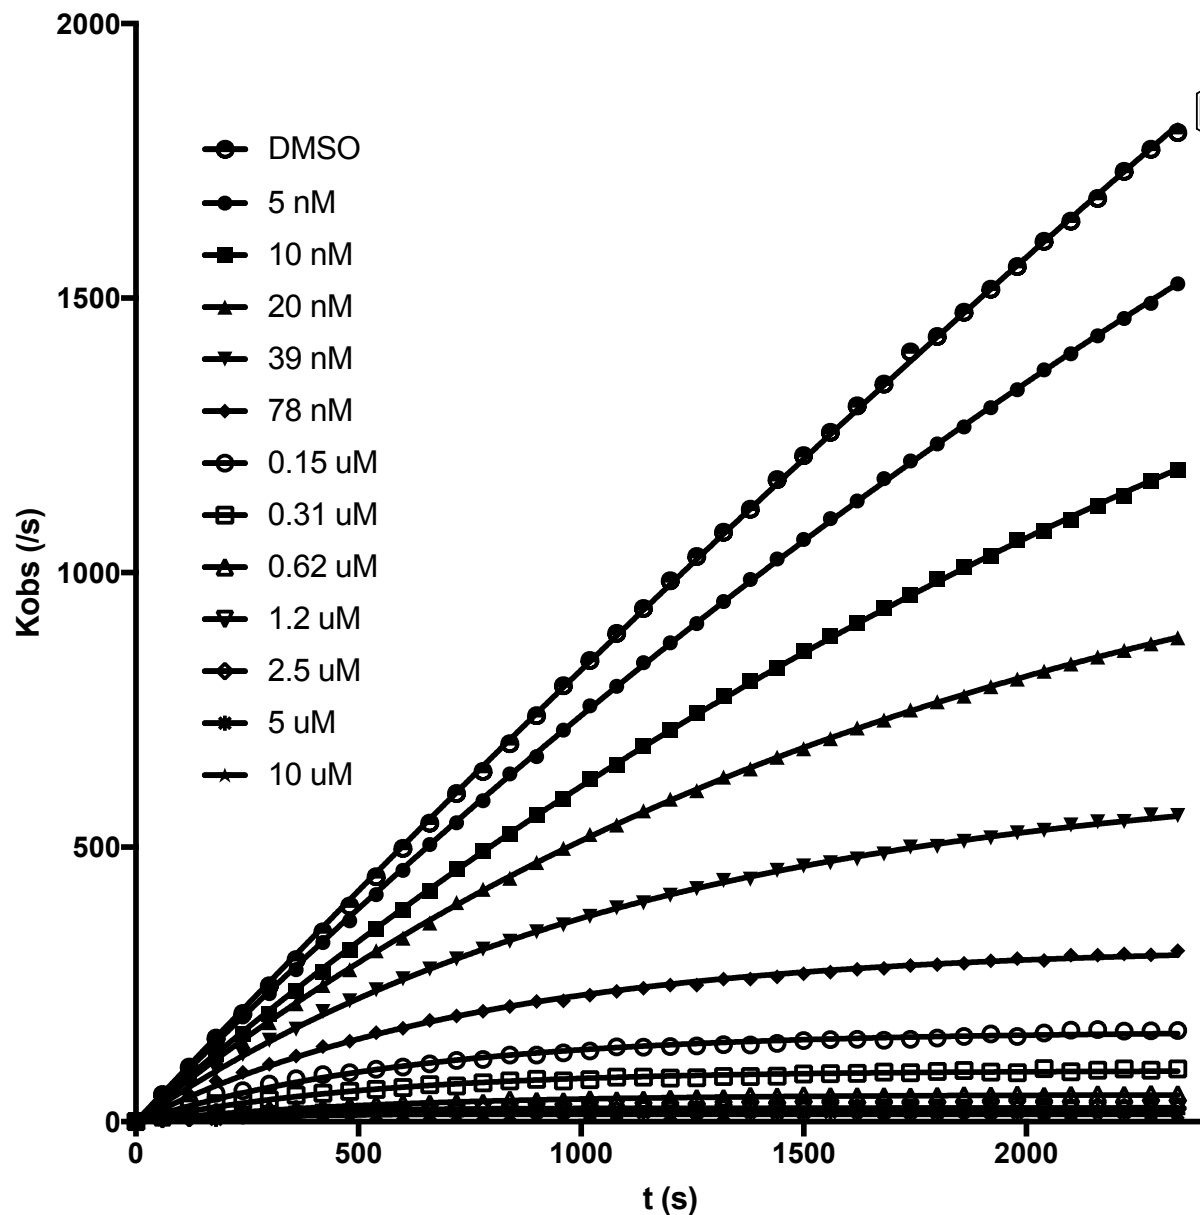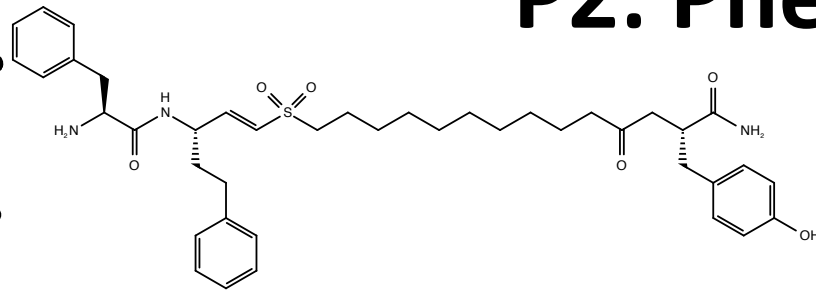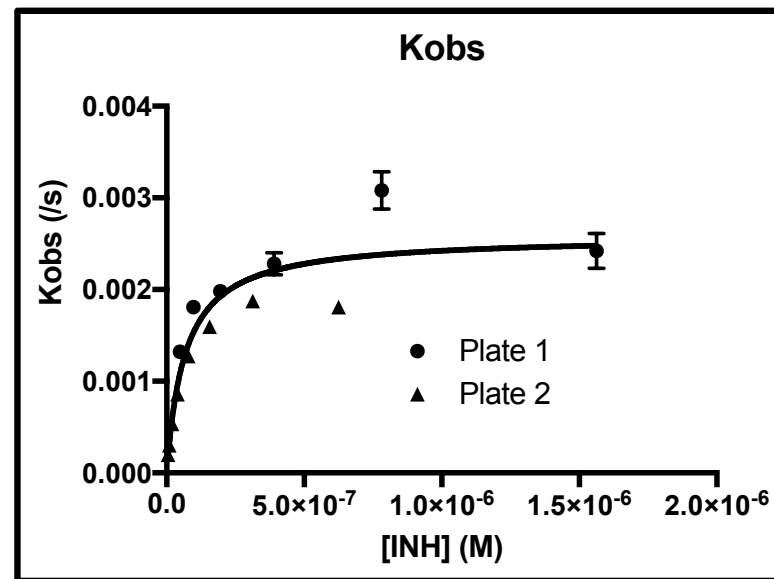

$$k_{\text{inact}} = 0.00207 \pm 0.00007 \text{ s}^{-1}$$

$$K_i = 37 \pm 4 \text{ nM}$$

$$K_{\text{inact}}/K_i = 60000 \pm 5000 \text{ M}^{-1}\text{s}^{-1}$$

# P2: 4mPhe

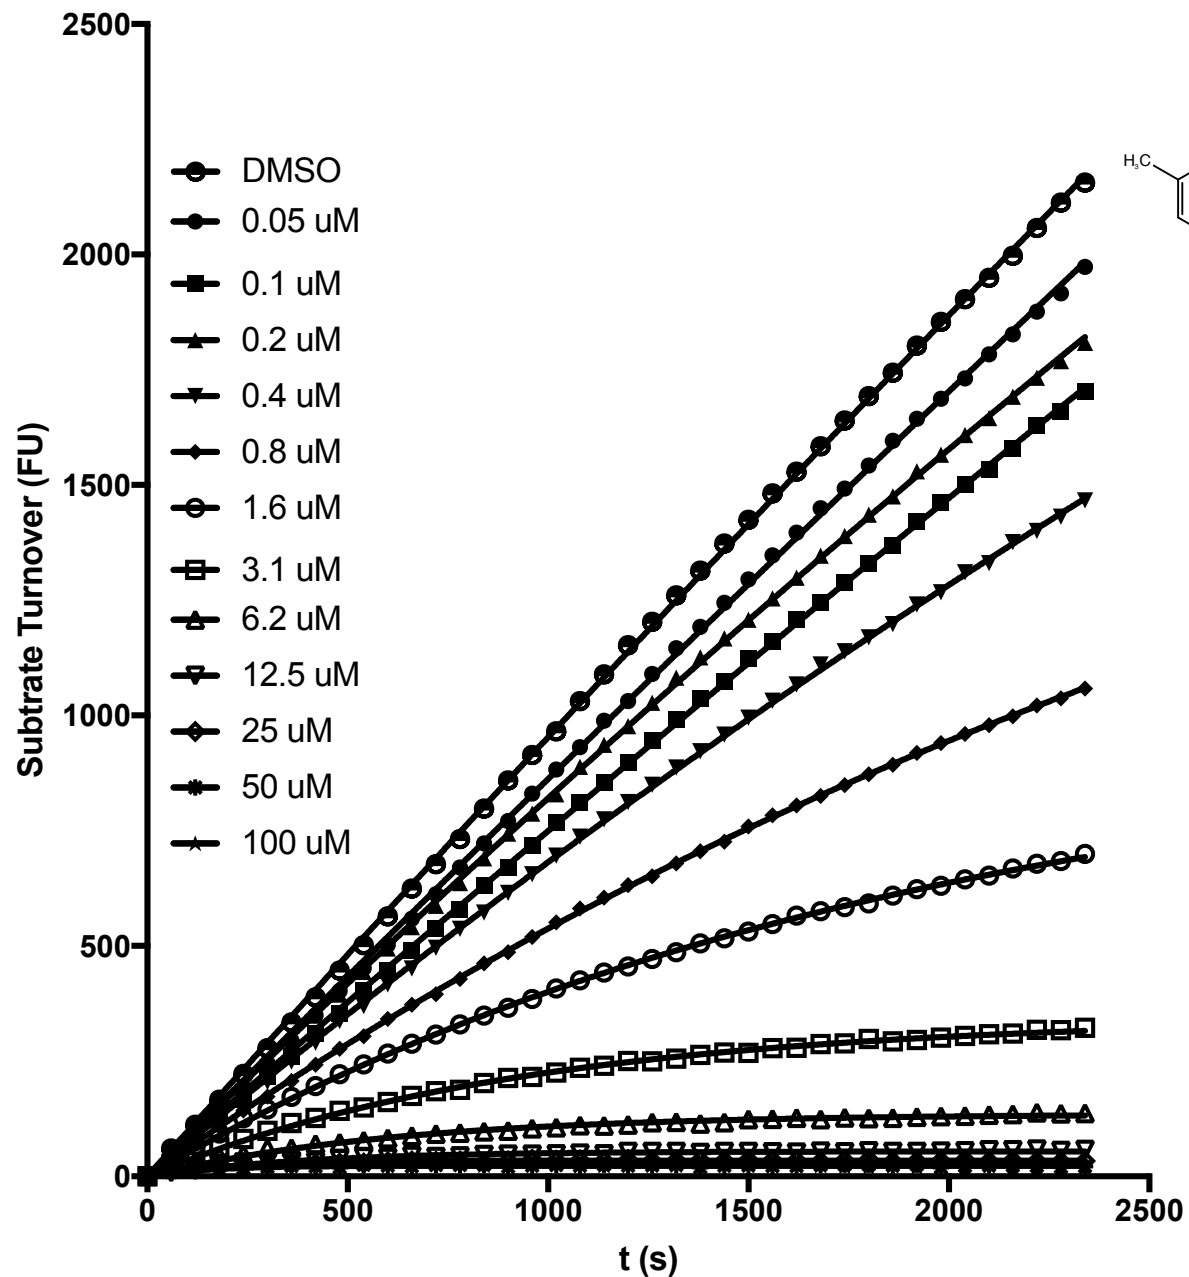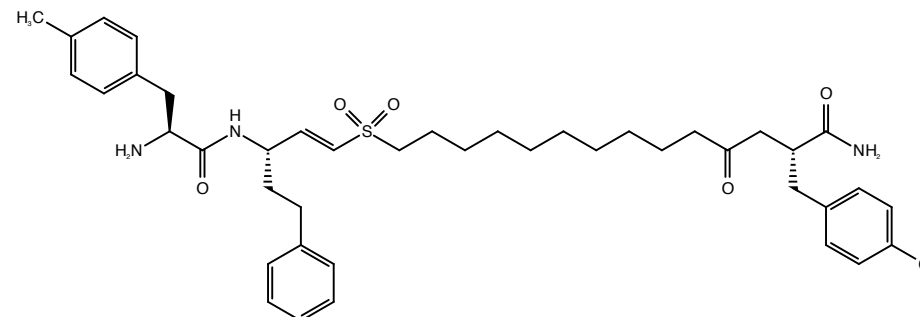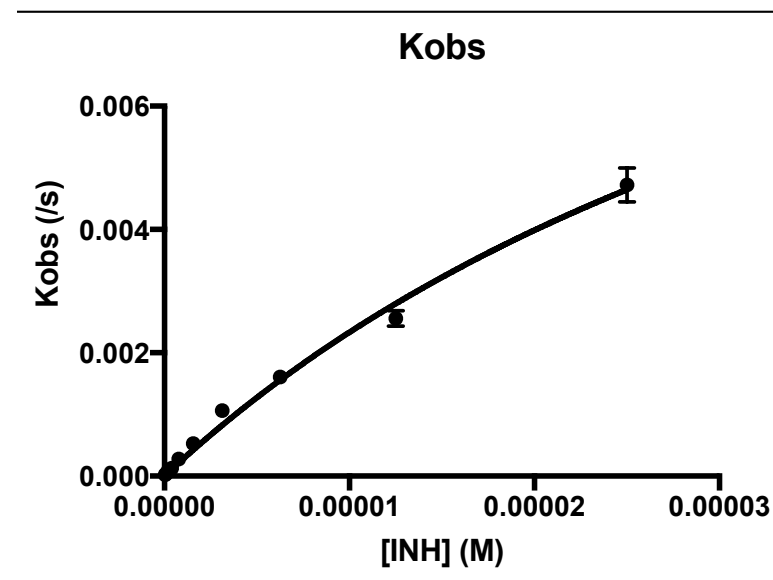

$$k_{\text{inact}} = 0.014 \pm 0.003 \text{ s}^{-1}$$
$$K_i = 33 \pm 9 \text{ uM}$$
$$K_{\text{inact}}/K_i = 420 \pm 30 \text{ M}^{-1}\text{s}^{-1}$$



# P2: 4nhPhe

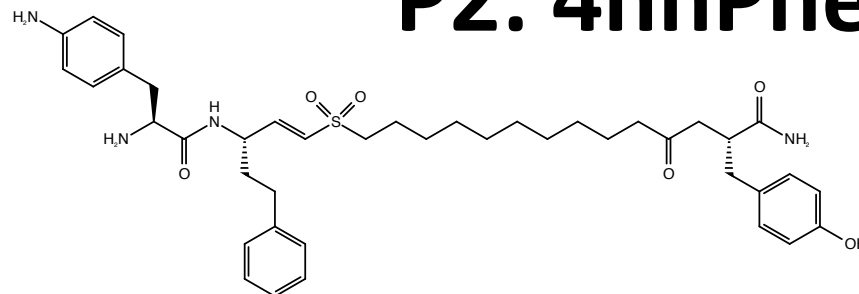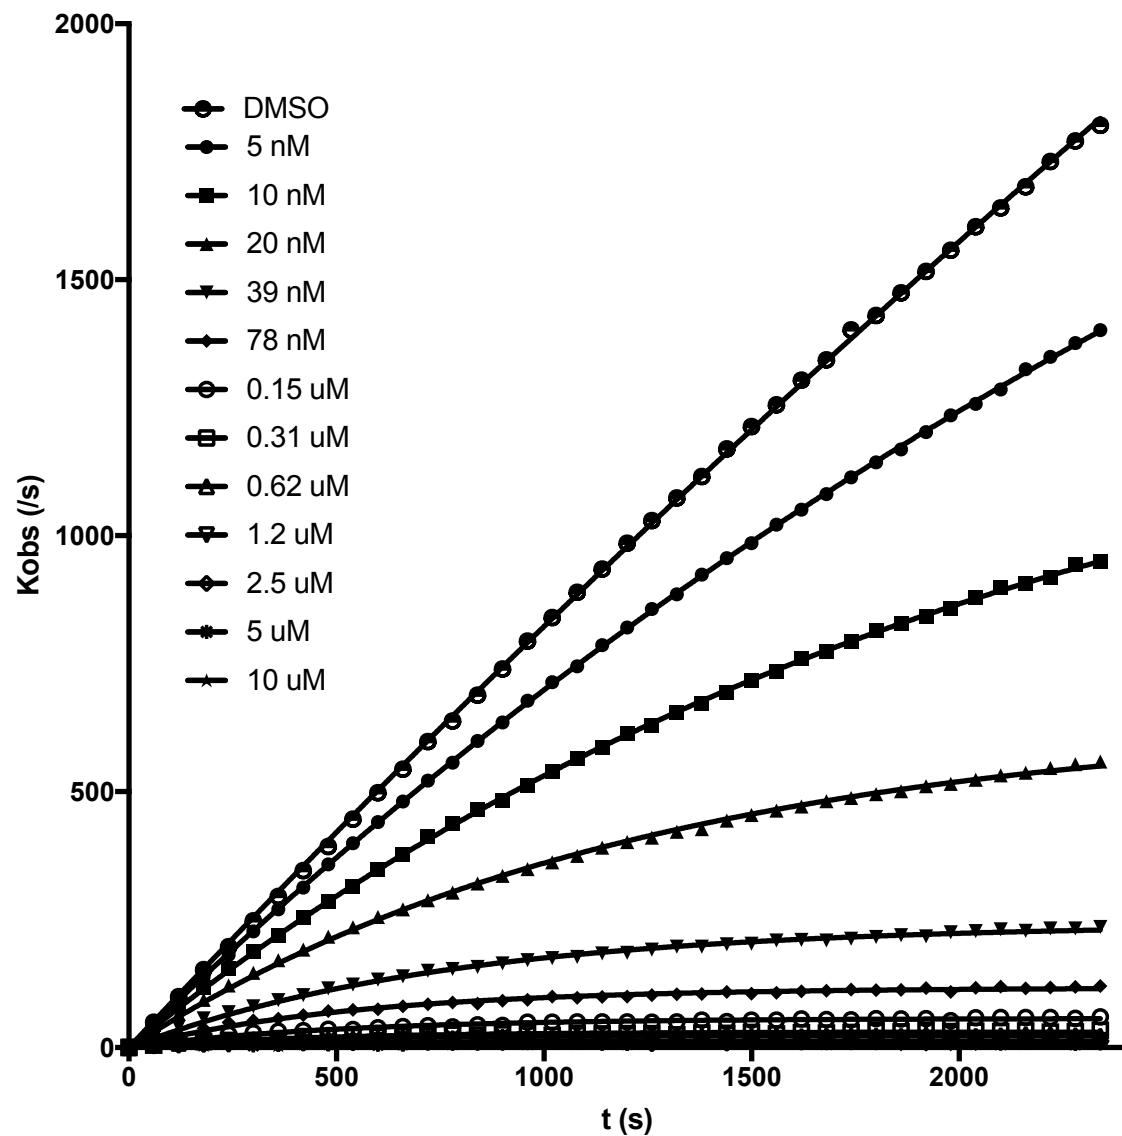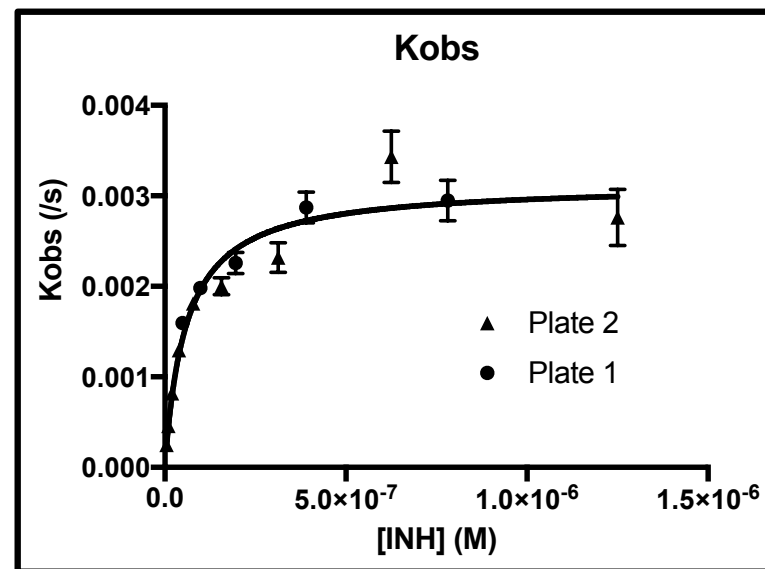

$$k_{\text{inact}} = 0.0031 \pm 0.0002 \text{ s}^{-1}$$

$$K_i = 39 \pm 7 \text{ nM}$$

$$K_{\text{inact}}/K_i = 80000 \pm 12000 \text{ M}^{-1}\text{s}^{-1}$$



# P2: Tyr

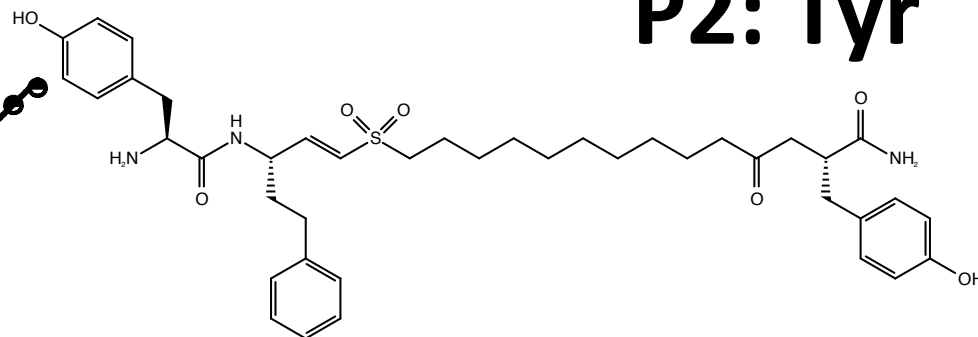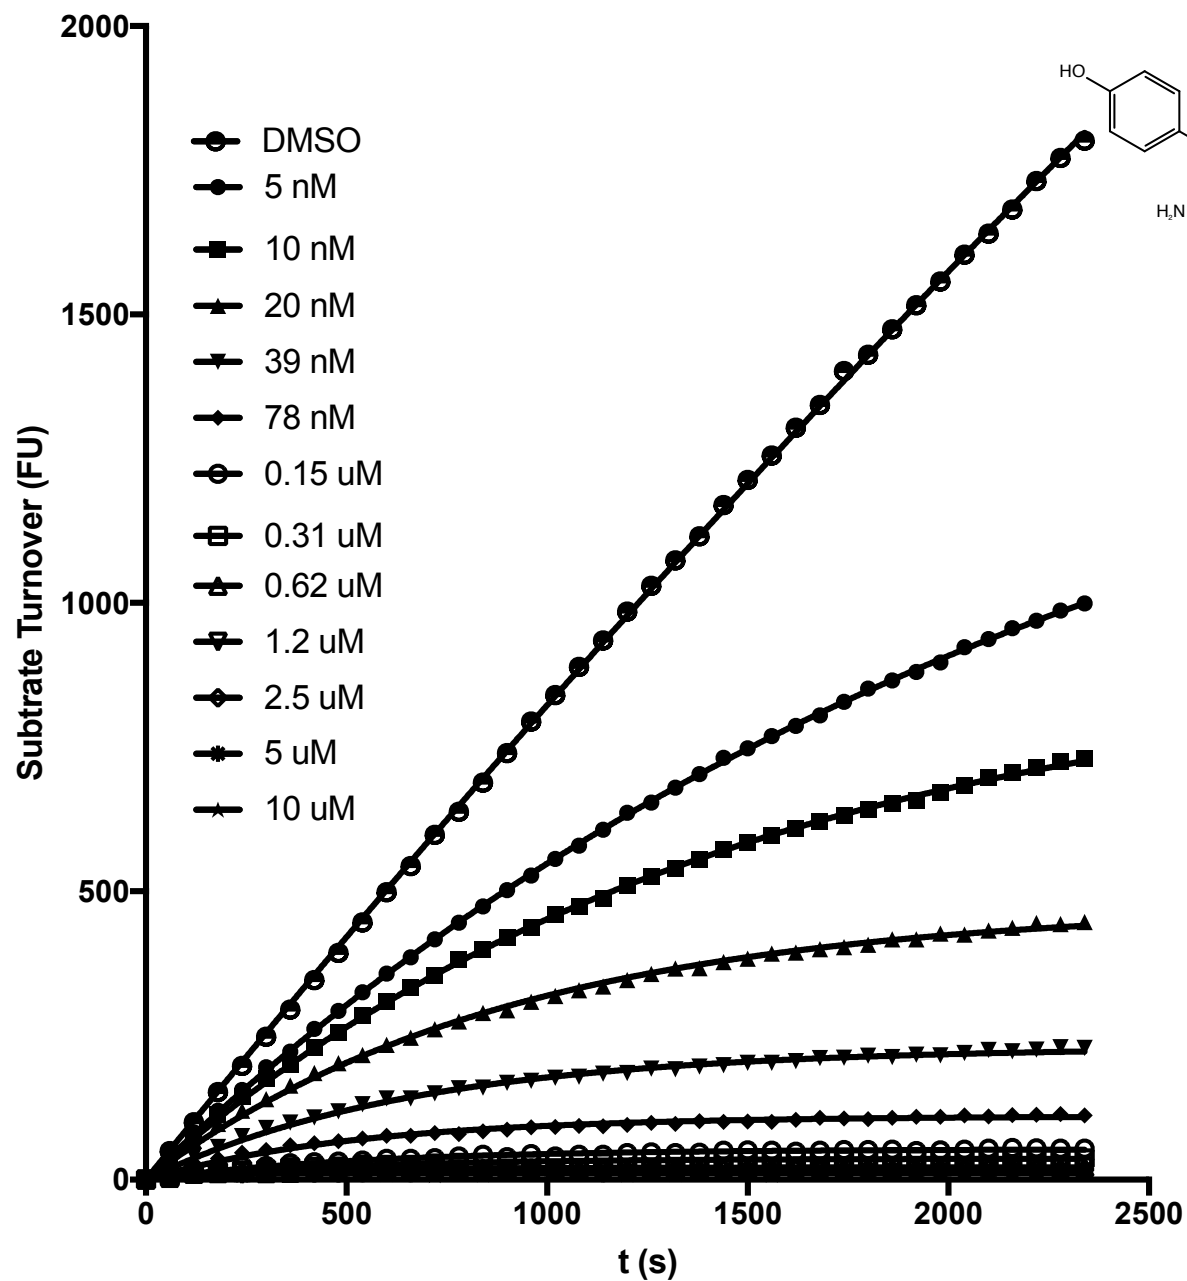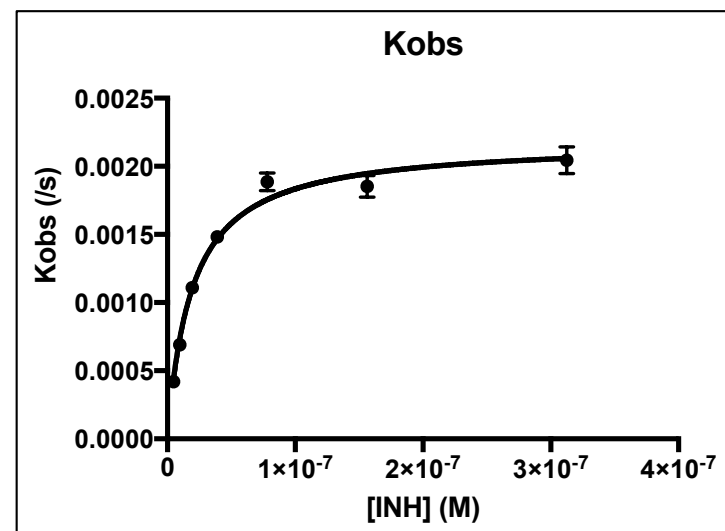

$$k_{\text{inact}} = 0.00218 \pm 0.00007 \text{ s}^{-1}$$
$$K_i = 12.7 \pm 1.5 \text{ nM}$$
$$K_{\text{inact}}/K_i = 172000 \pm 16000 \text{ M}^{-1}\text{s}^{-1}$$

# P2: Tyr(NO<sub>2</sub>)

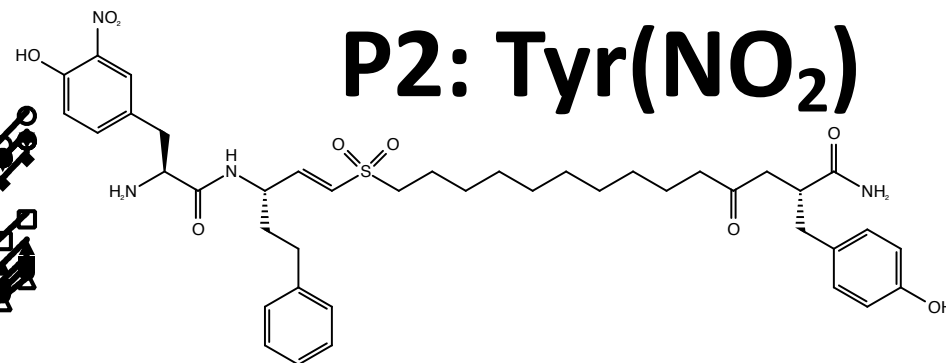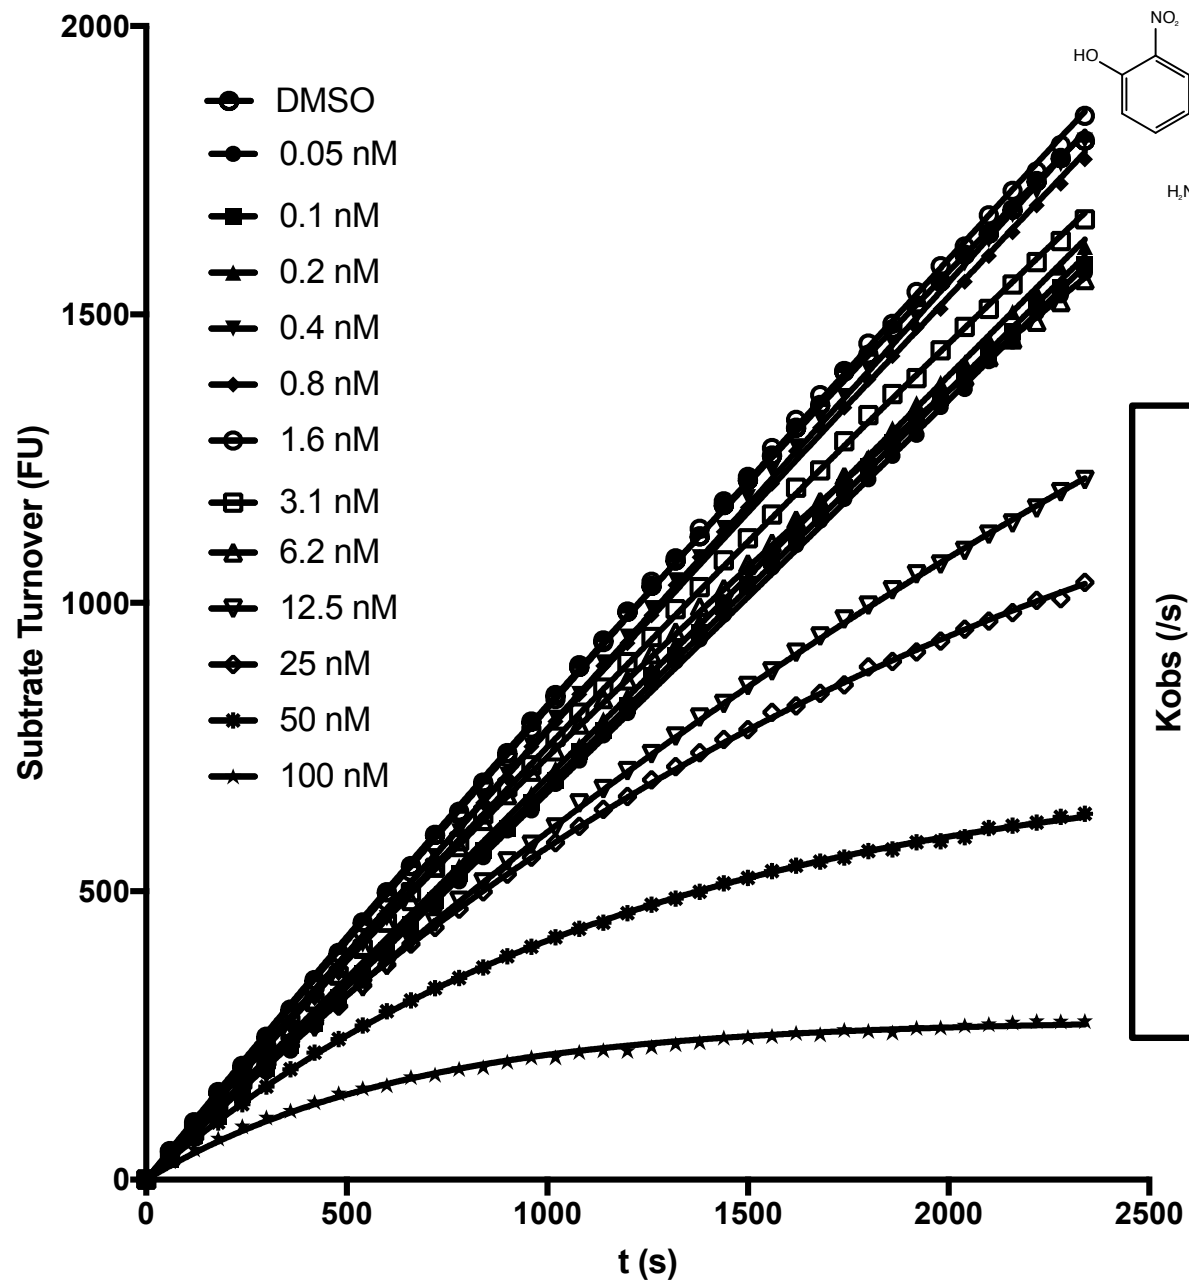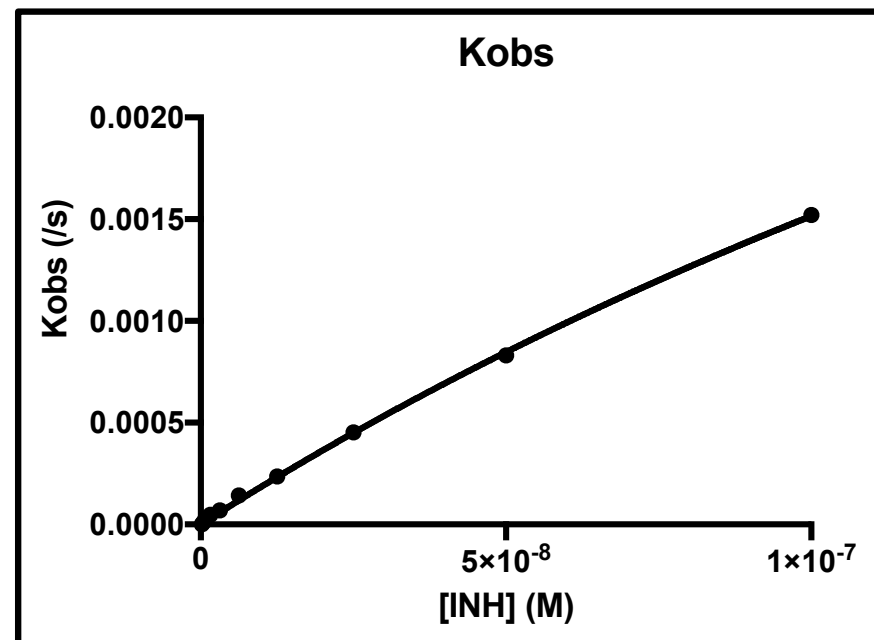

$$k_{inact} = 0.0072 \pm 0.0009 \text{ s}^{-1}$$

$$K_i = 251 \pm 37 \text{ nM}$$

$$K_{inact}/K_i = 28800 \pm 800 \text{ M}^{-1}\text{s}^{-1}$$

# P2: hPhe

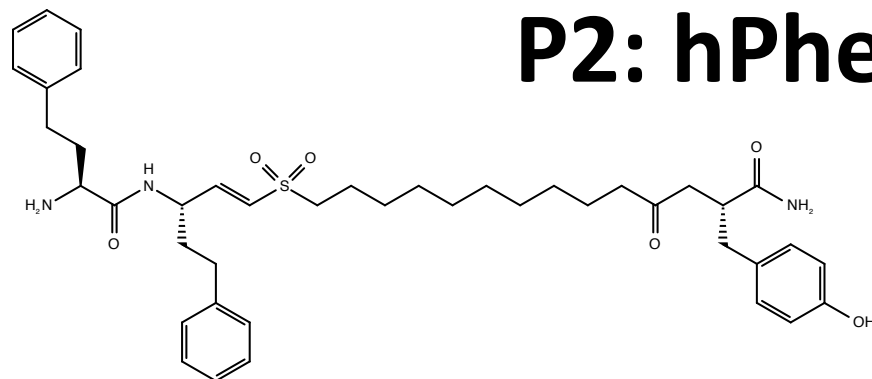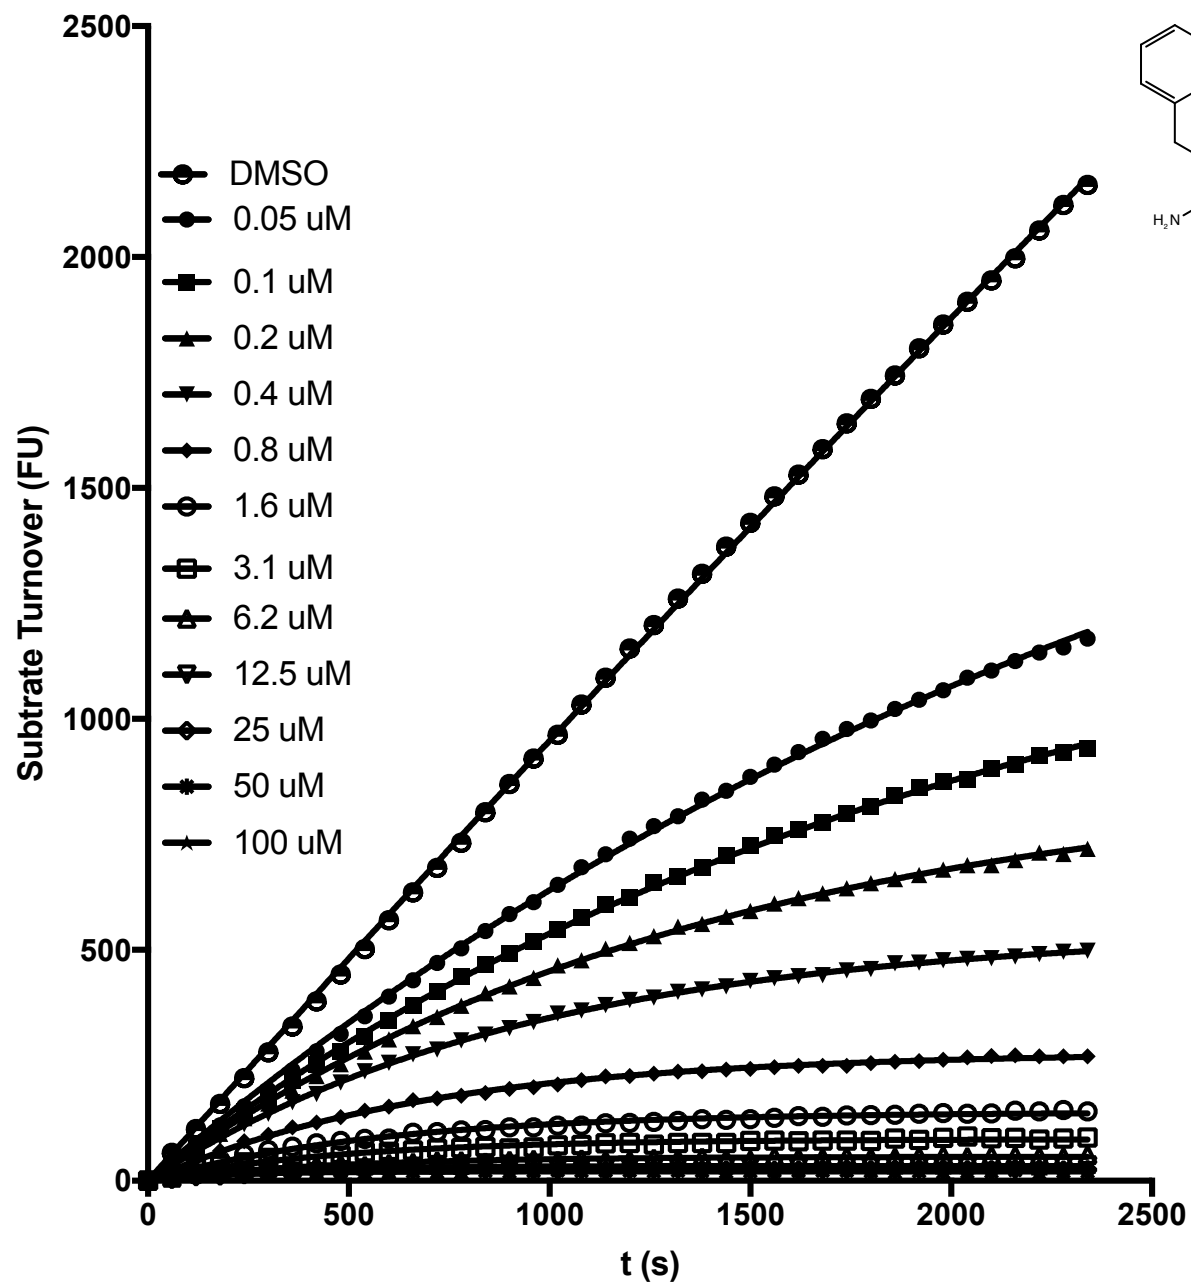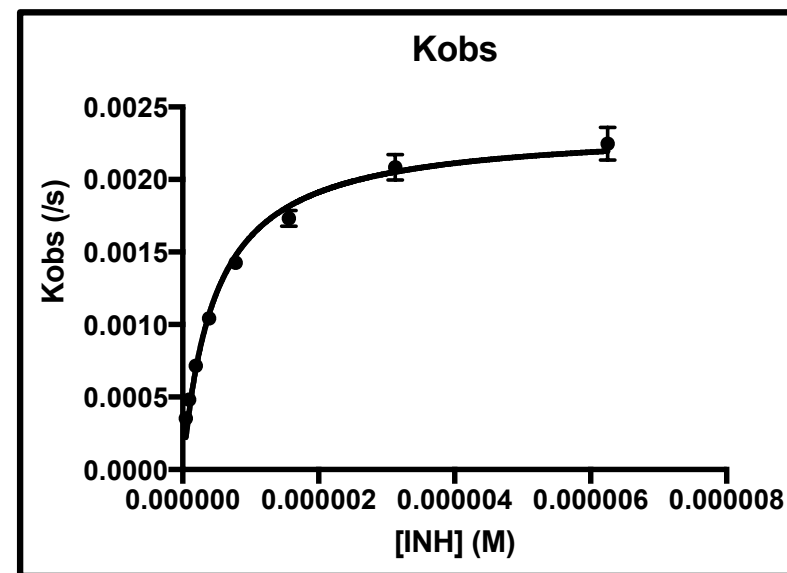

$$k_{\text{inact}} = 0.00236 \pm 0.00008 \text{ s}^{-1}$$

$$K_i = 312 \pm 34 \text{ nM}$$

$$K_{\text{inact}}/K_i = 7550 \pm 660 \text{ M}^{-1}\text{s}^{-1}$$

# P2: Trp

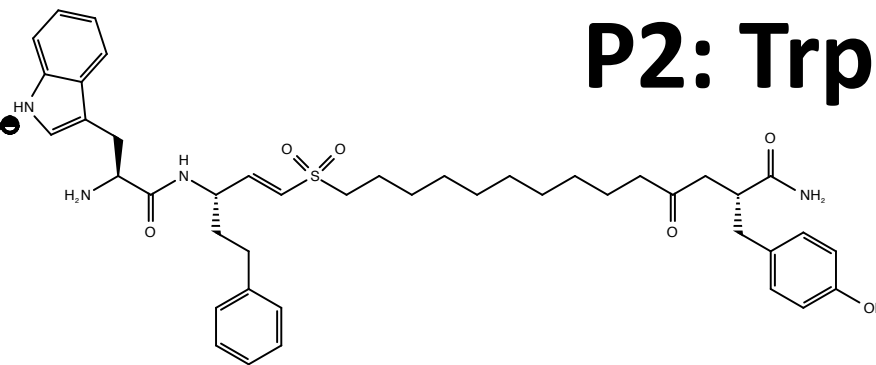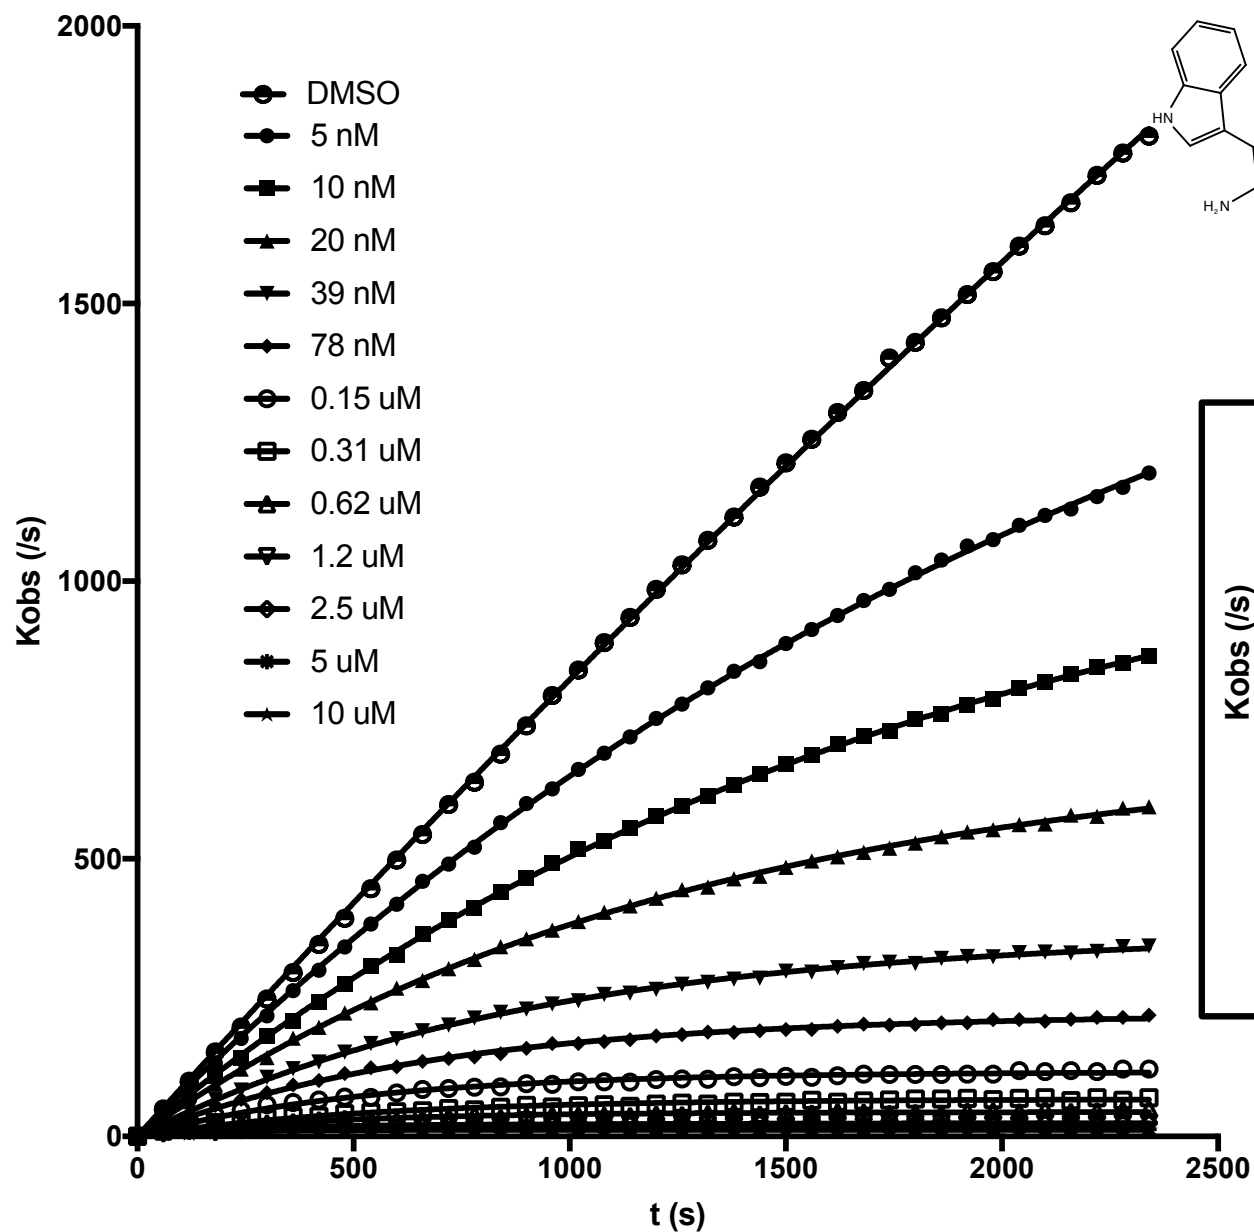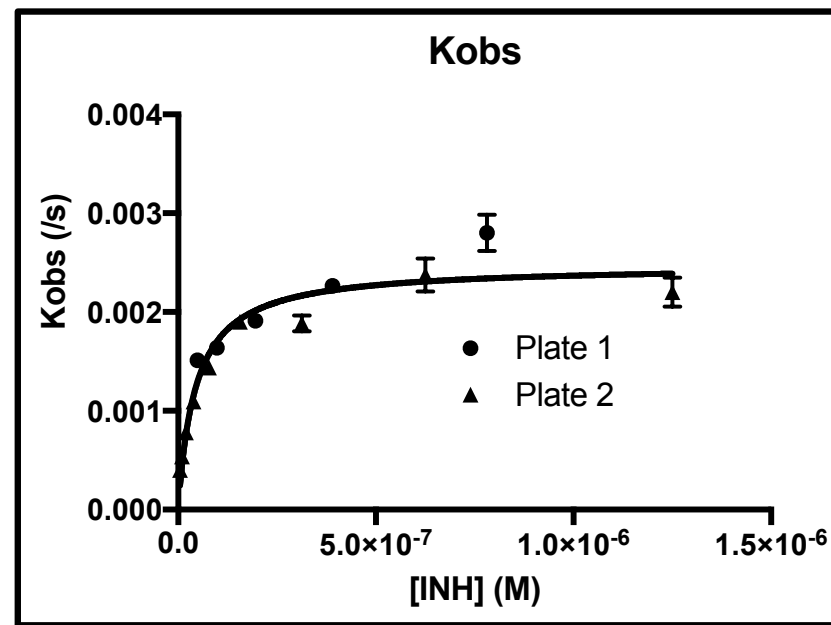

$$k_{\text{inact}} = 0.0025 \pm 0.0001 \text{ s}^{-1}$$
$$K_i = 30 \pm 6 \text{ nM}$$
$$K_{\text{inact}}/K_i = 83600 \pm 13400 \text{ M}^{-1}\text{s}^{-1}$$

# P2: Igl

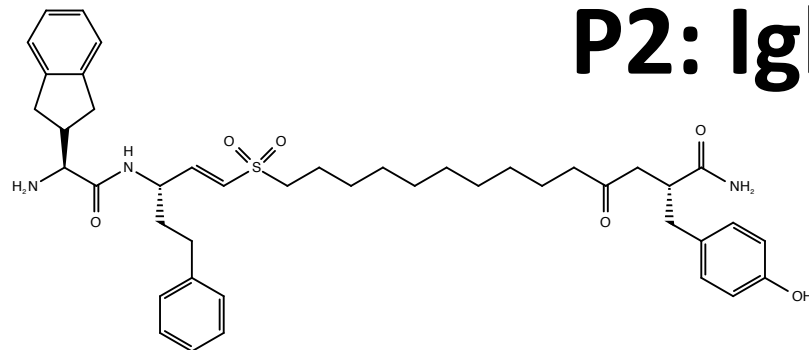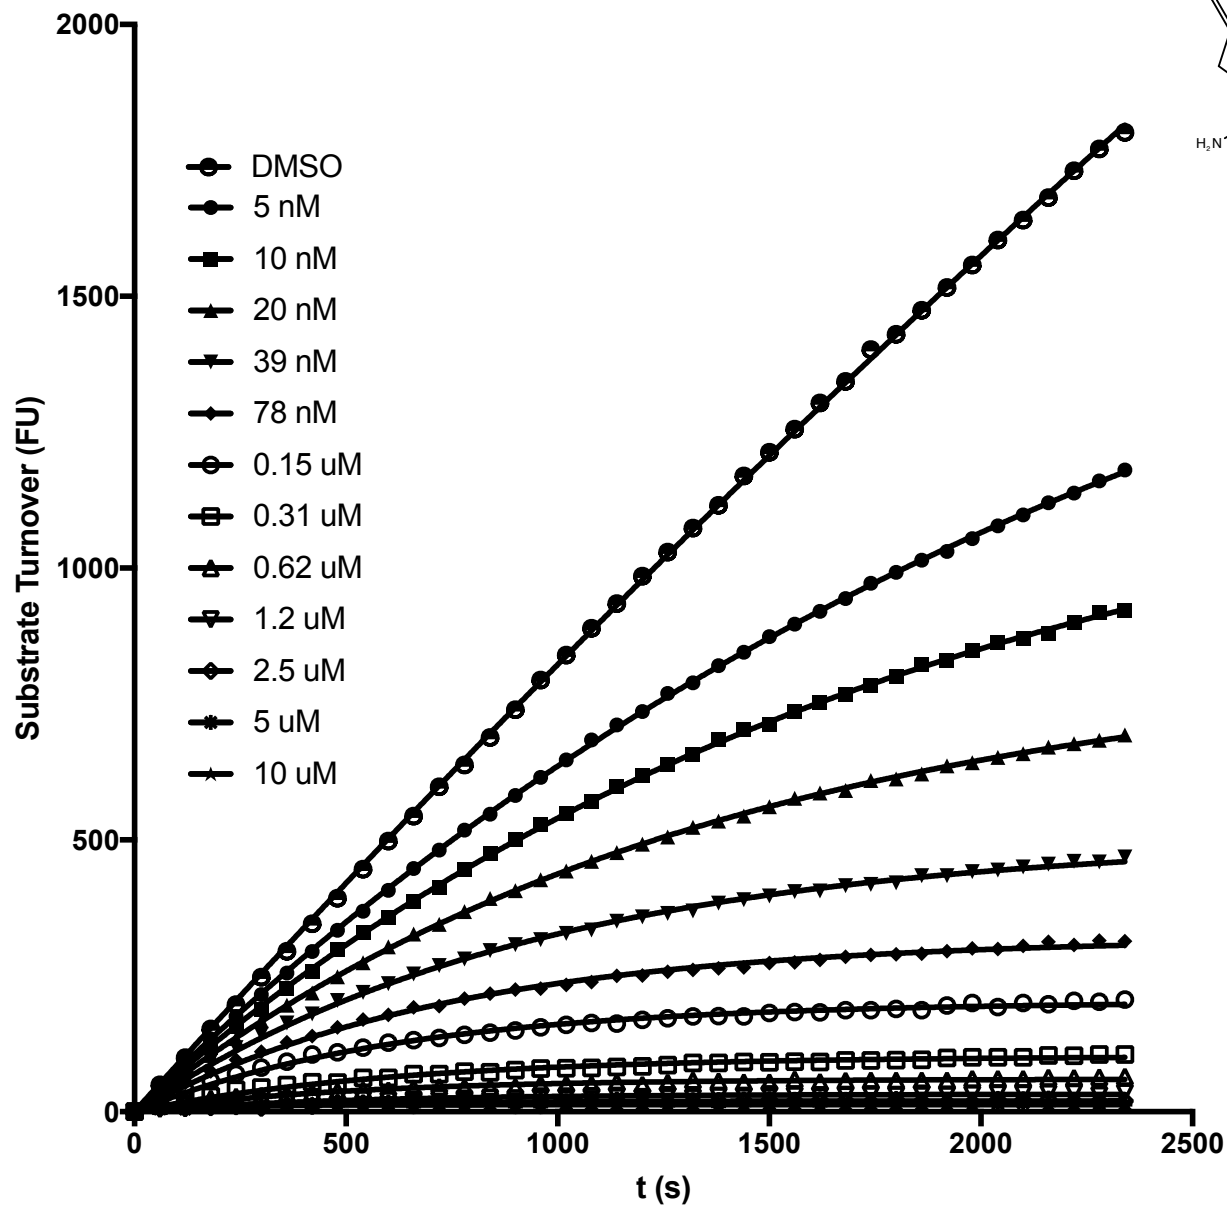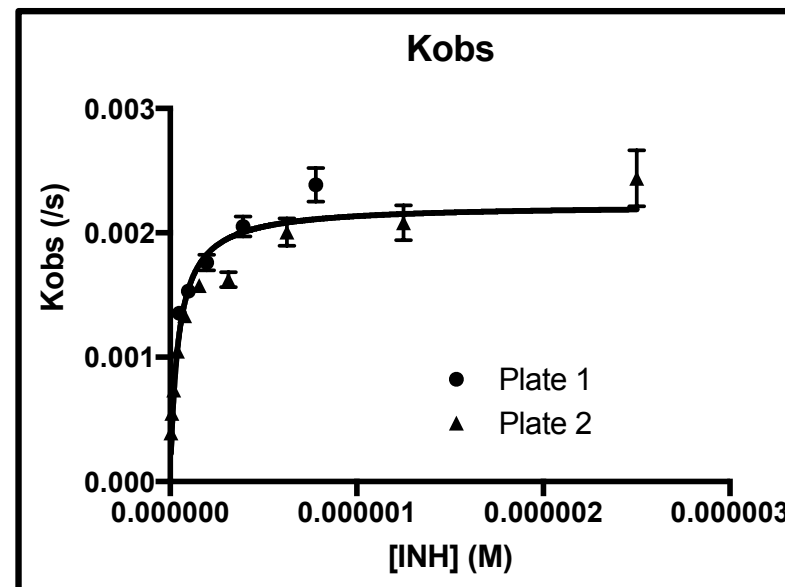

$$k_{\text{inact}} = 0.0022 \pm 0.0001 \text{ s}^{-1}$$
$$K_i = 29 \pm 5 \text{ nM}$$
$$K_{\text{inact}}/K_i = 77700 \pm 11800 \text{ M}^{-1}\text{s}^{-1}$$

# P2: 2NaI

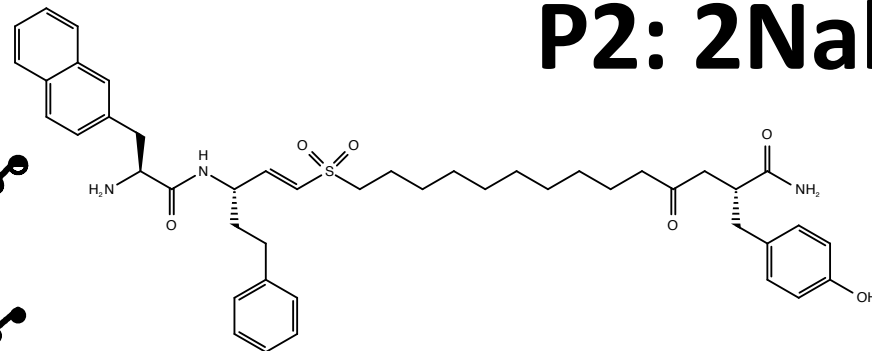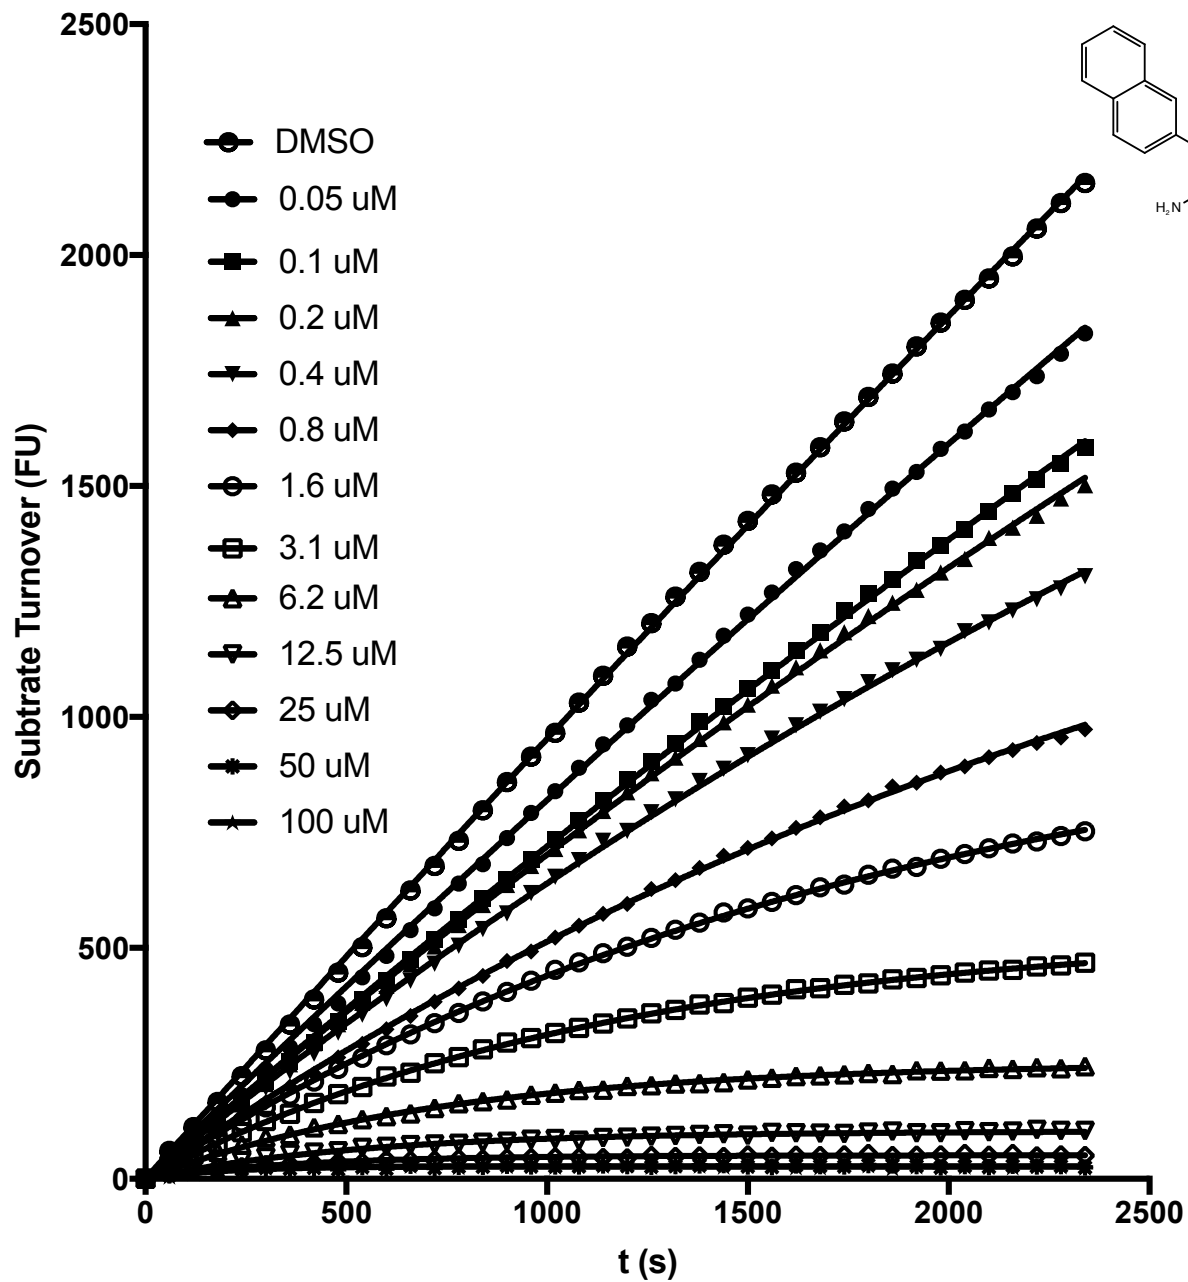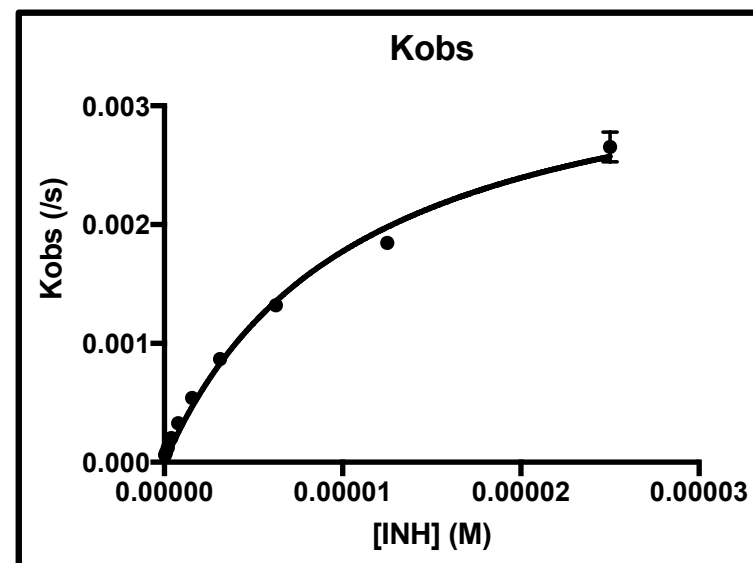

$$k_{\text{inact}} = 0.0037 \pm 0.0003 \text{ s}^{-1}$$
$$K_i = 7.1 \pm 1 \text{ uM}$$
$$K_{\text{inact}}/K_i = 514 \pm 42 \text{ M}^{-1}\text{s}^{-1}$$

# P2: Bip

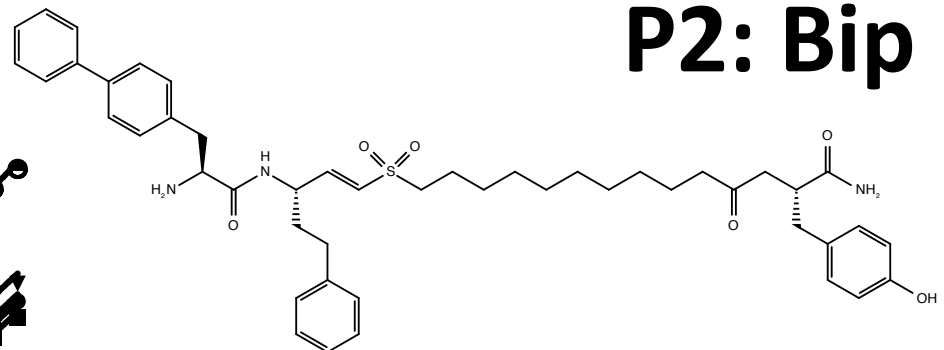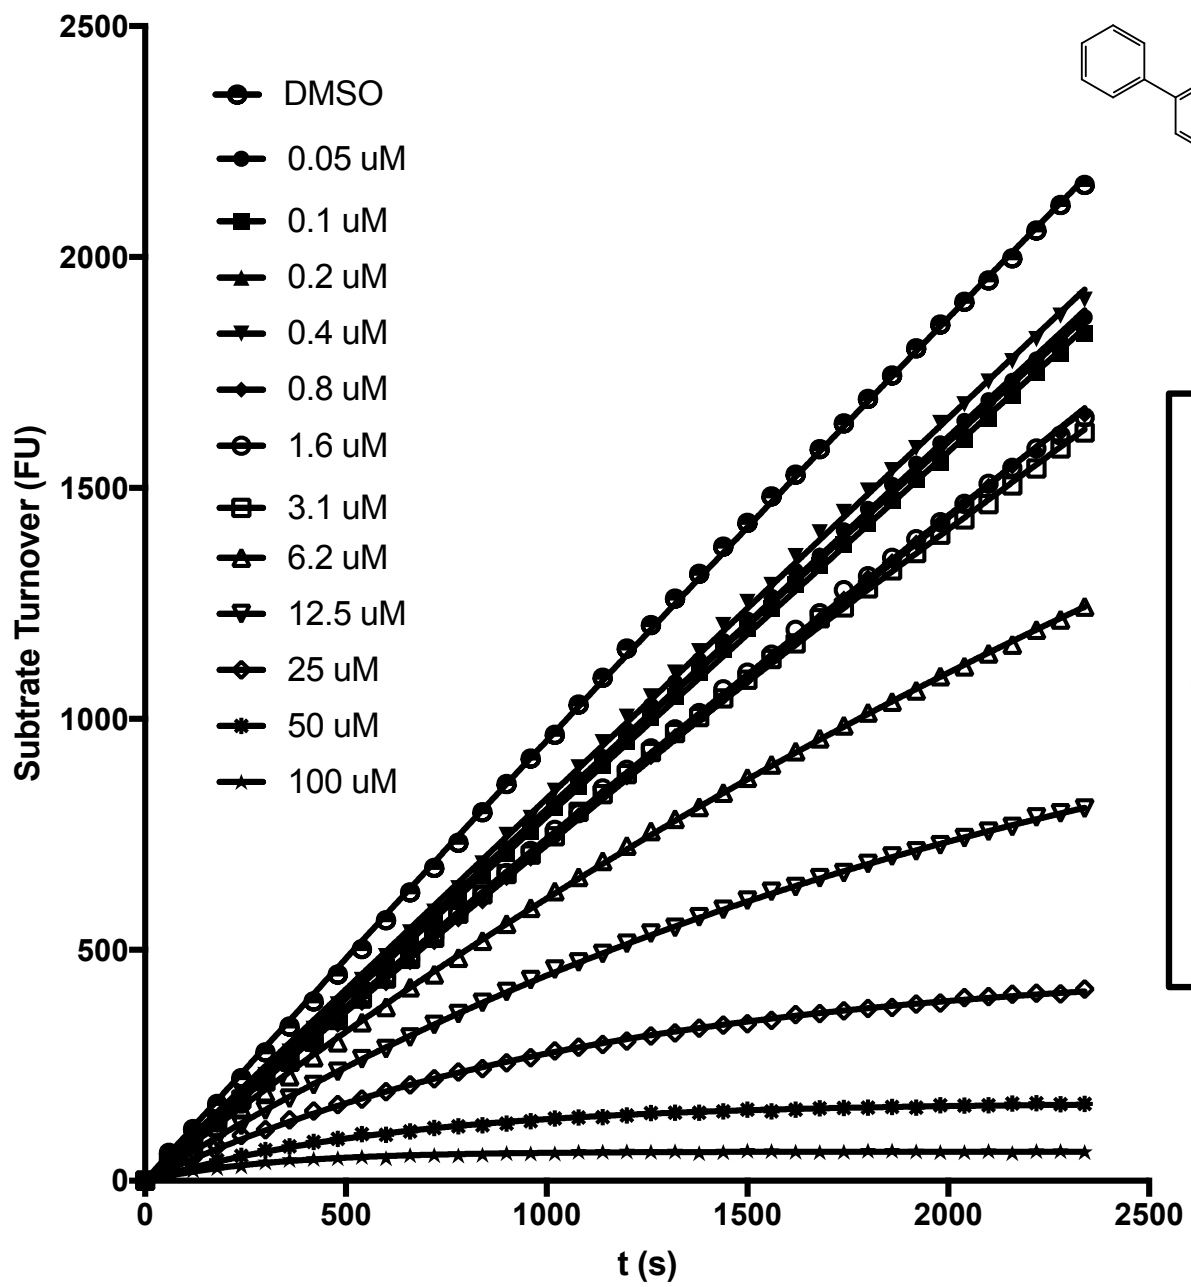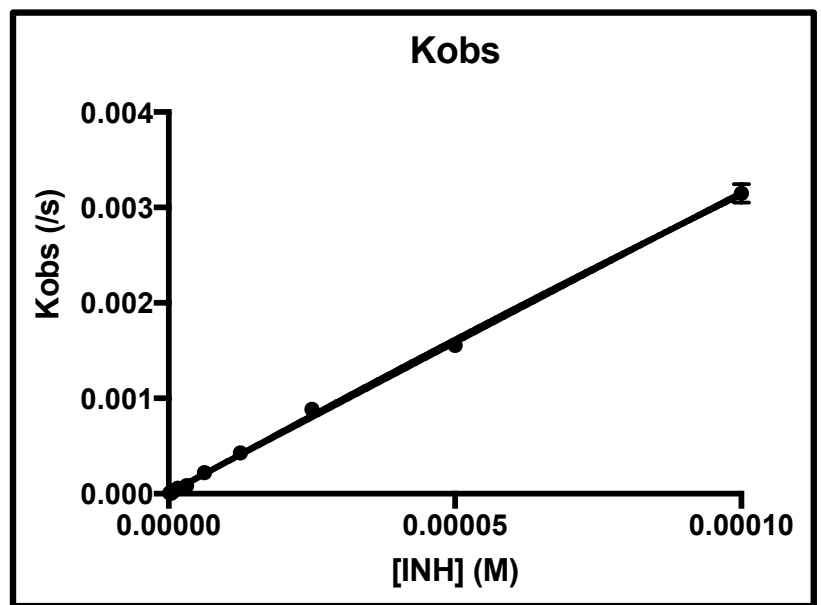

$k_{inact} = N/A$   
 $K_i = N/A$   
 $K_{inact}/K_i = 31.4 \pm 0.4 \text{ M}^{-1}\text{s}^{-1}$

# P2: Inp

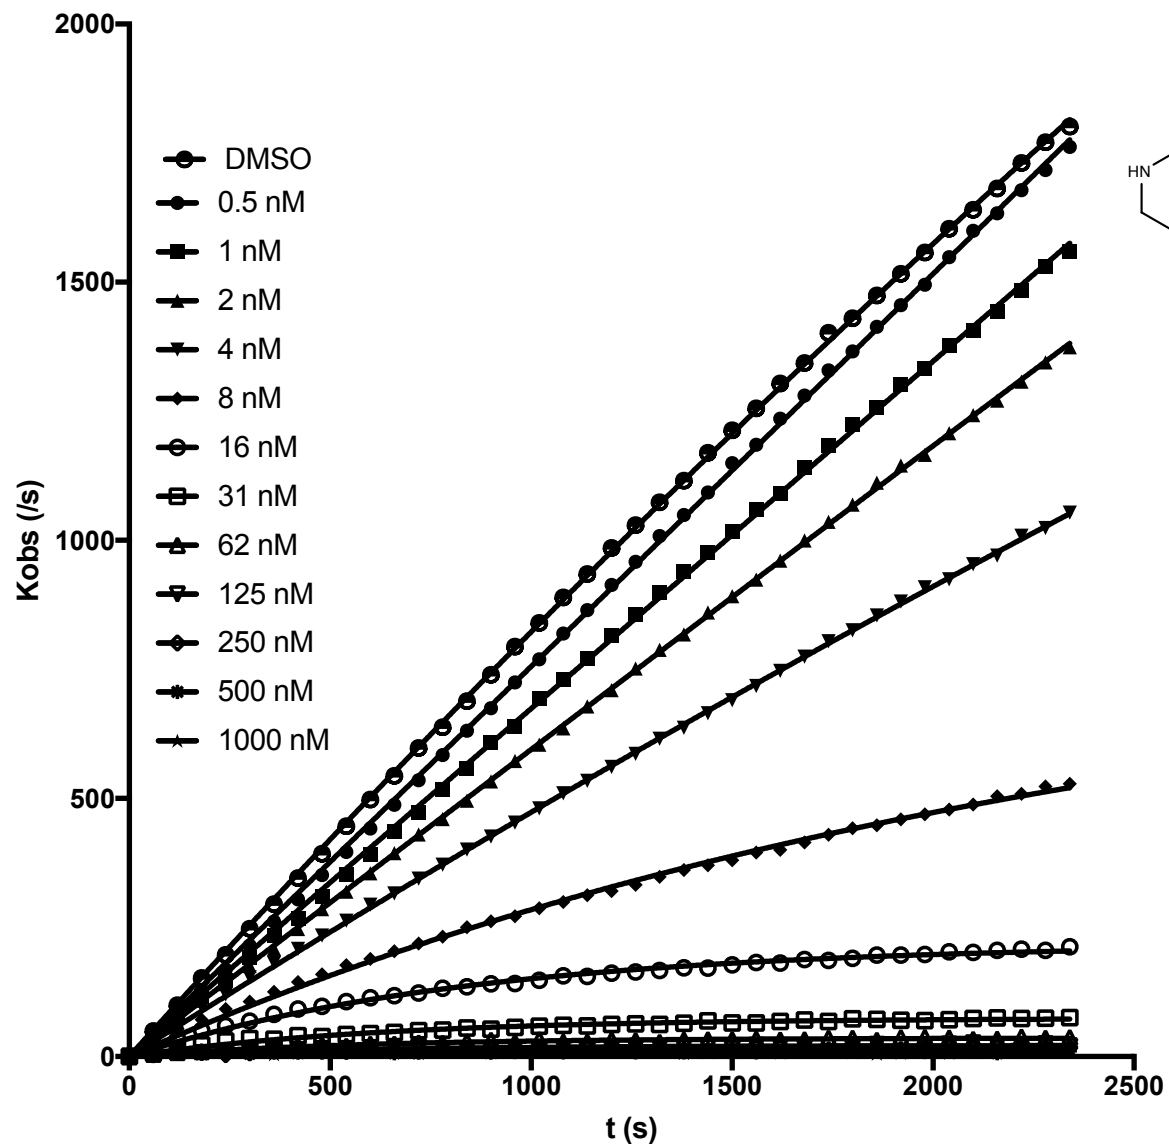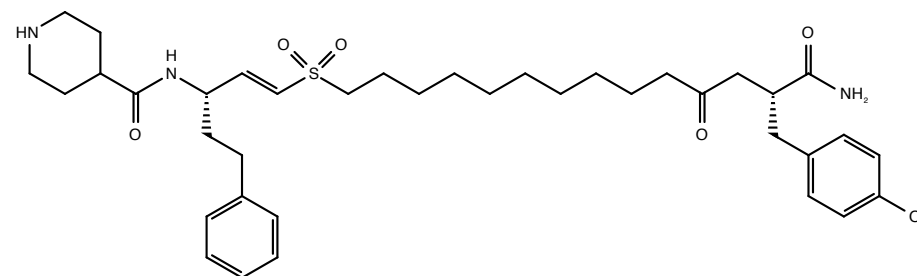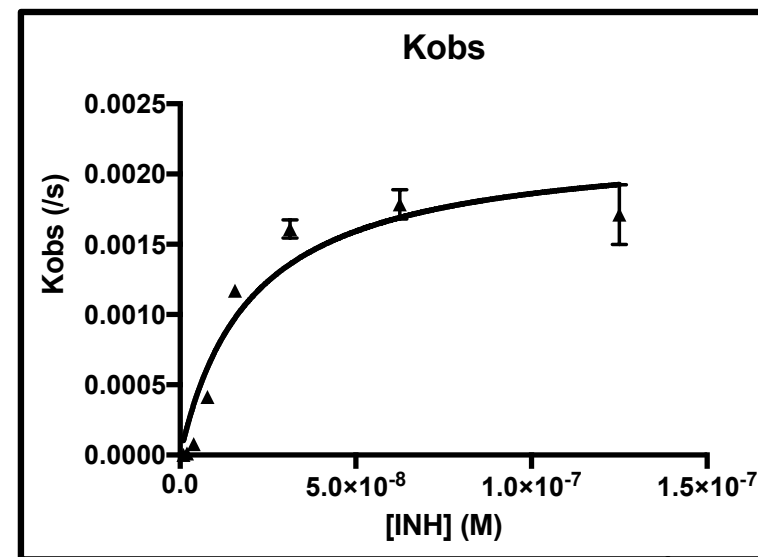

$$K_{\text{inact}} = 0.0052 \pm 0.0004 \text{ s}^{-1}$$

$$K_i = 65 \pm 8 \text{ } \mu\text{M}$$

$$K_{\text{inact}}/K_i = 79 \pm 4 \text{ M}^{-1}\text{s}^{-1}$$



# P2: Amc

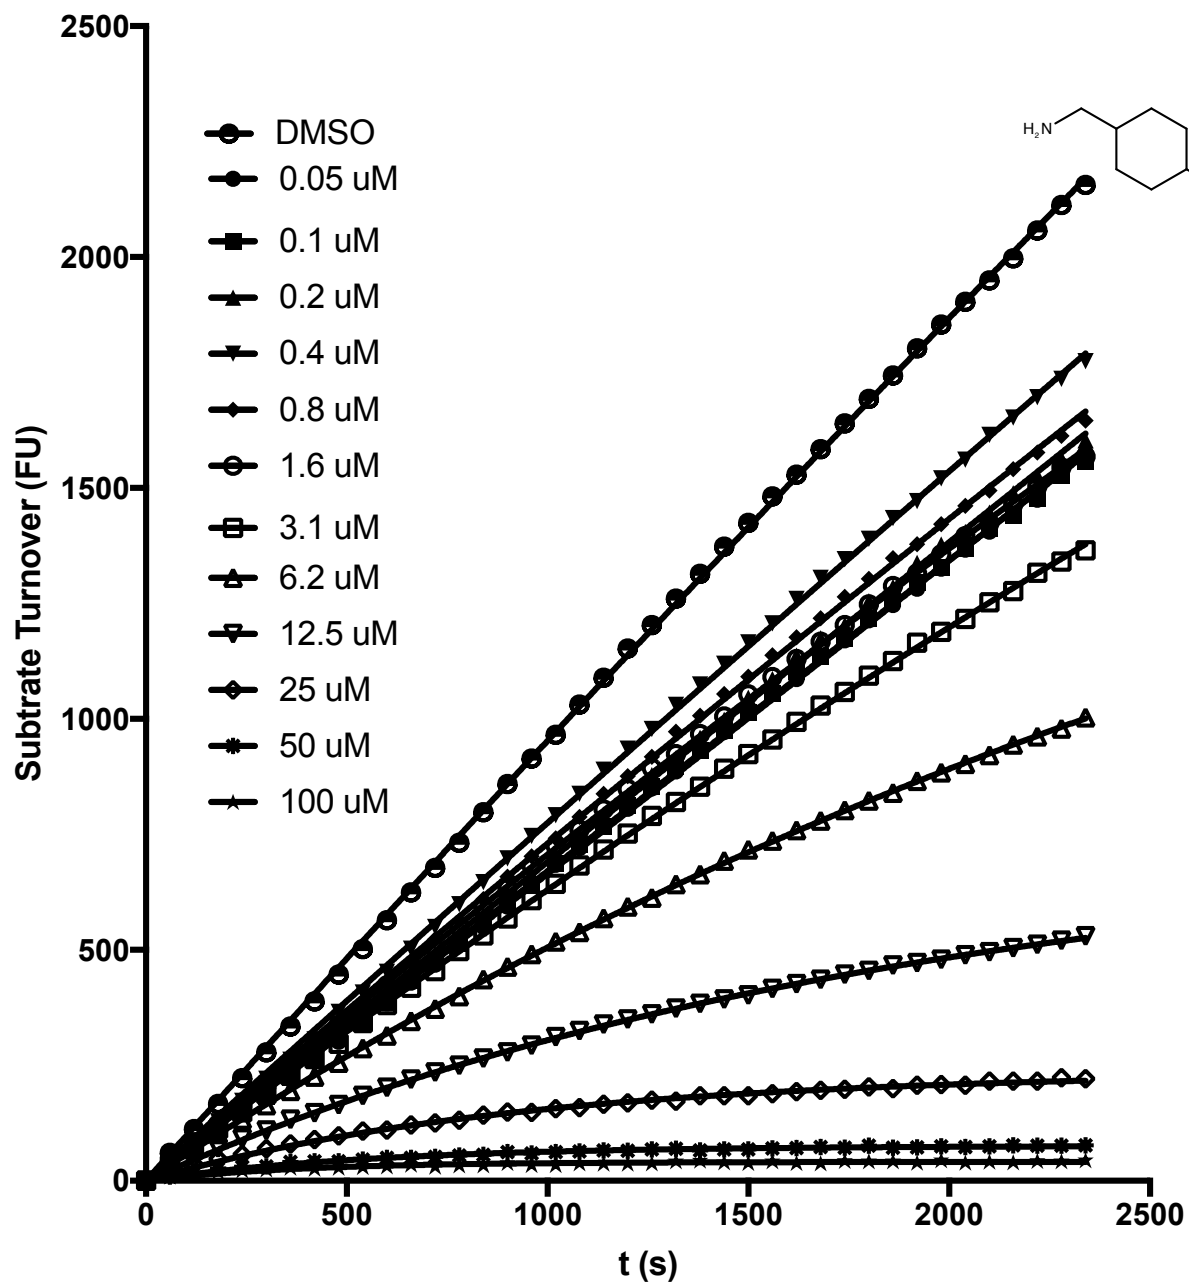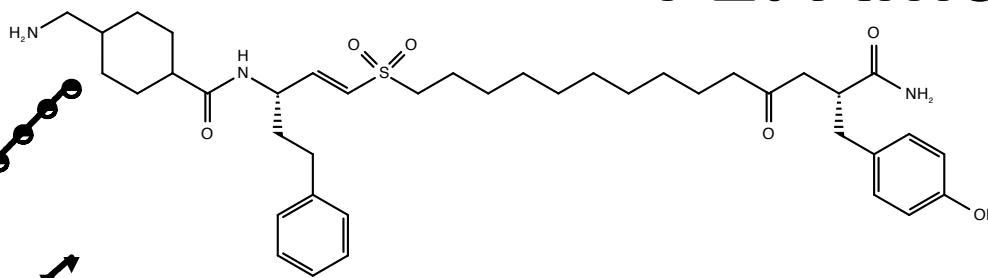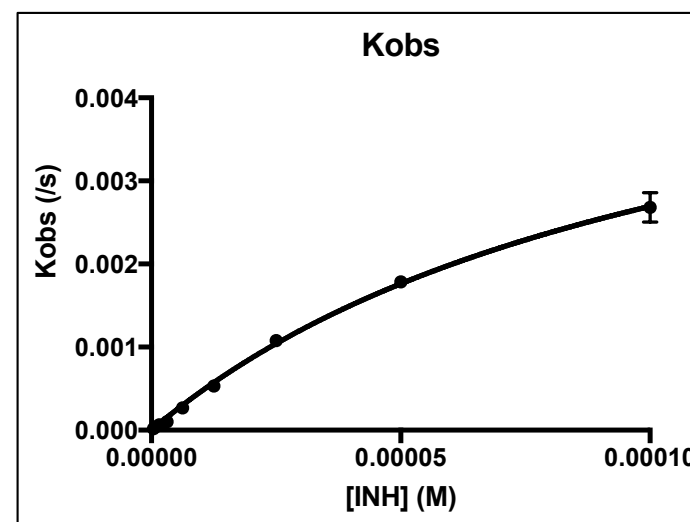

$$k_{\text{inact}} = 0.0057 \pm 0.0003 \text{ s}^{-1}$$
$$K_i = 75 \pm 7 \text{ uM}$$
$$K_{\text{inact}}/K_i = 76 \pm 3 \text{ M}^{-1}\text{s}^{-1}$$

# P2: 3Abz

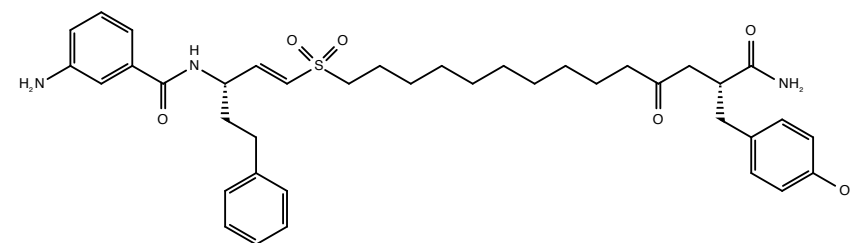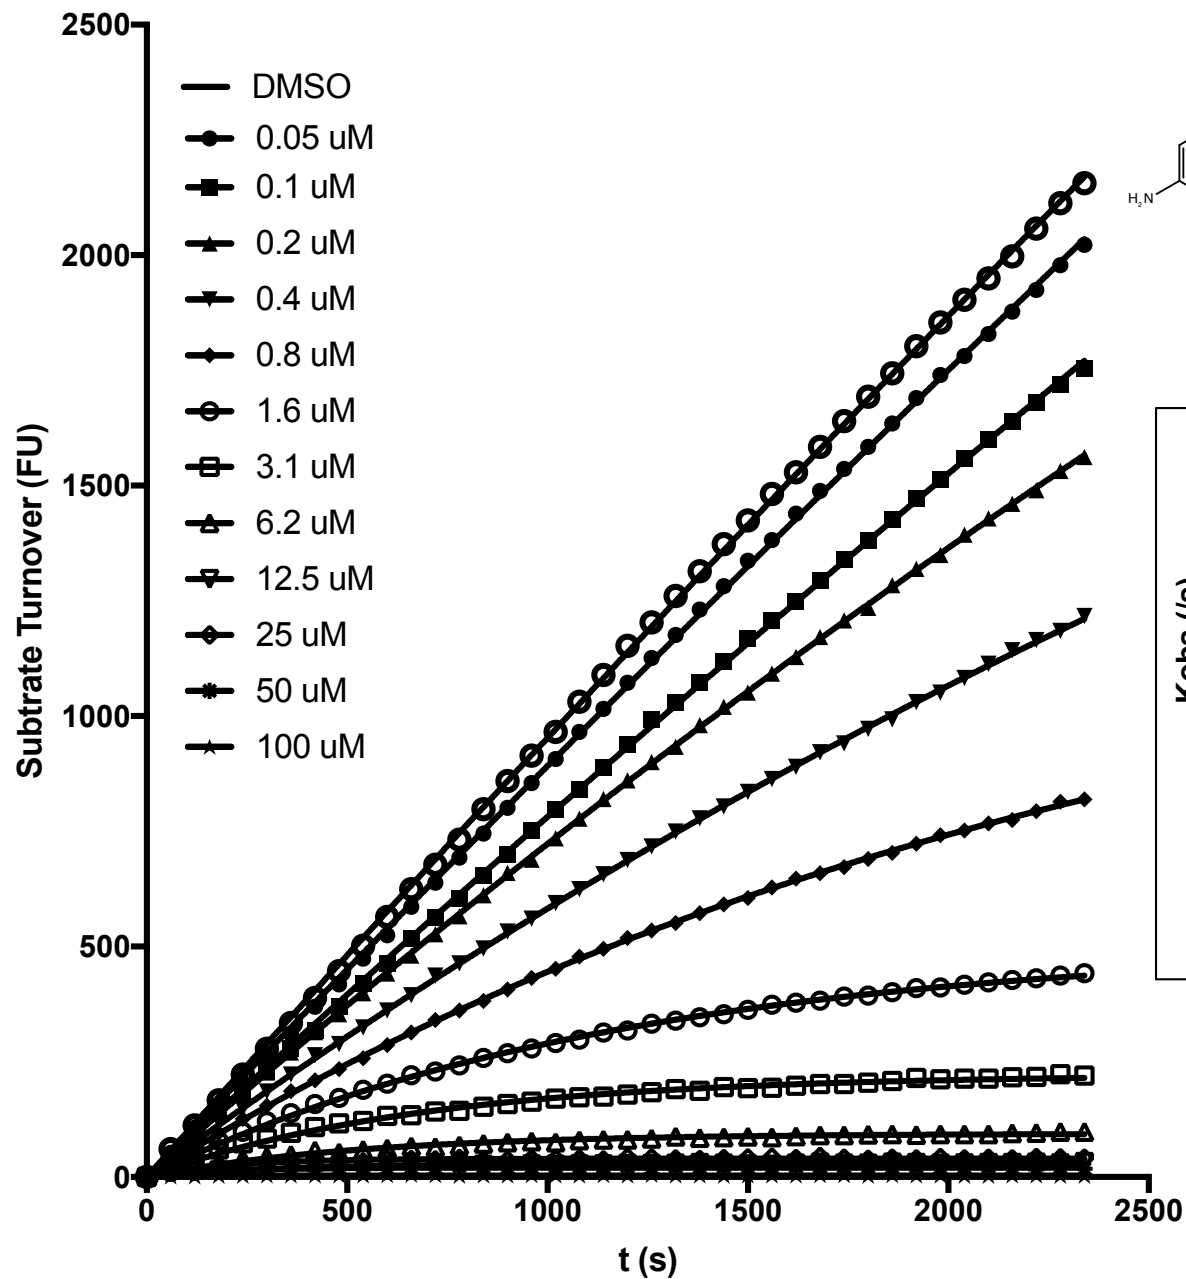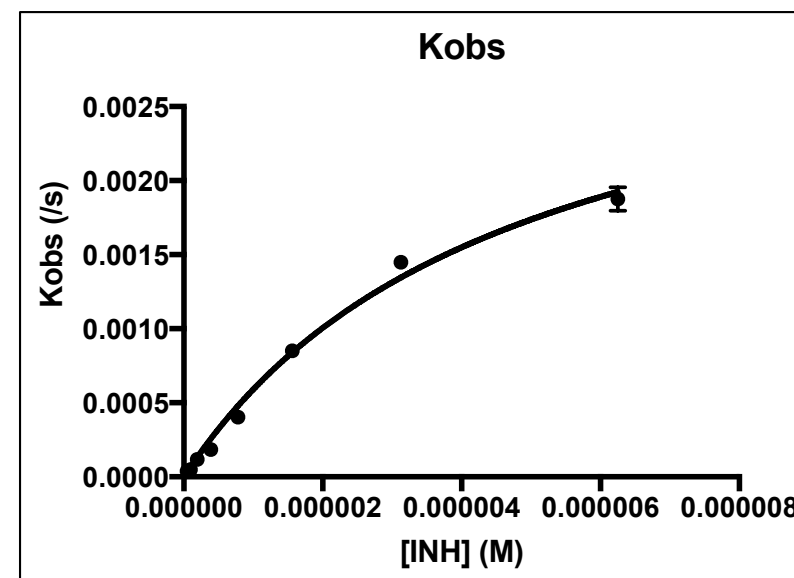

$$k_{\text{inact}} = 0.0034 \pm 0.0004 \text{ s}^{-1}$$

$$K_i = 3.1 \pm 0.6 \text{ uM}$$

$$K_{\text{inact}}/K_i = 1074 \pm 95 \text{ M}^{-1}\text{s}^{-1}$$

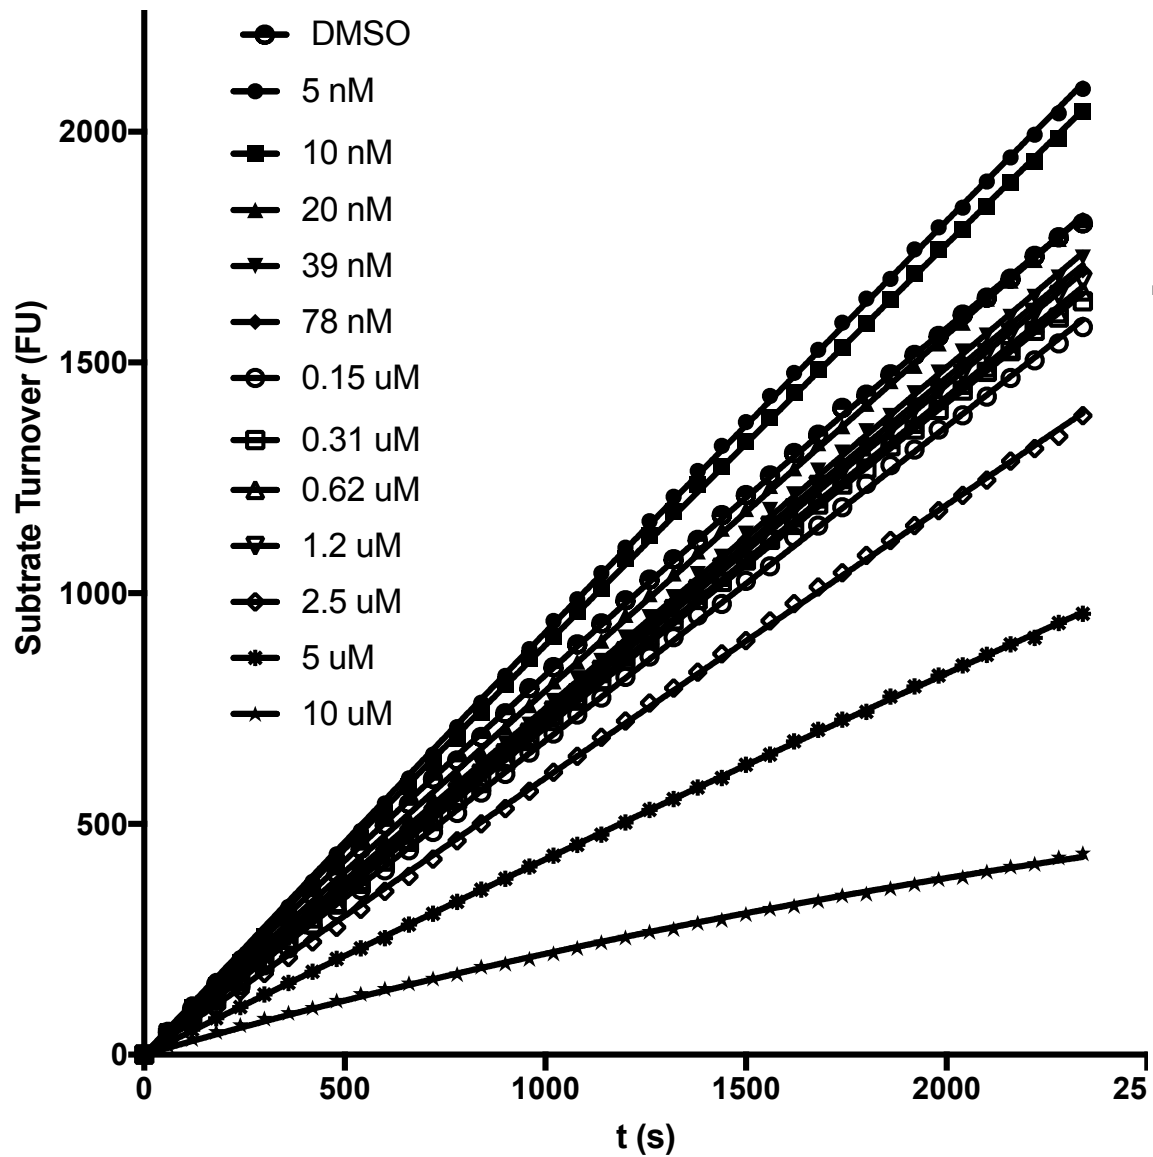

## P2: Amb

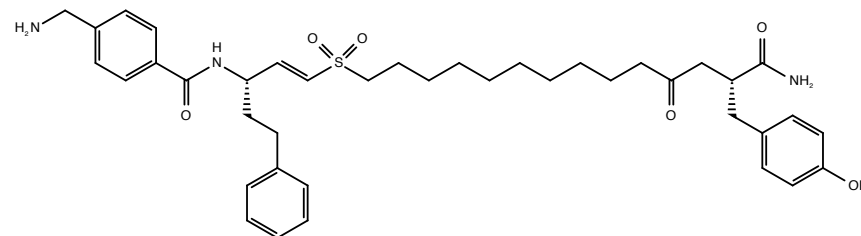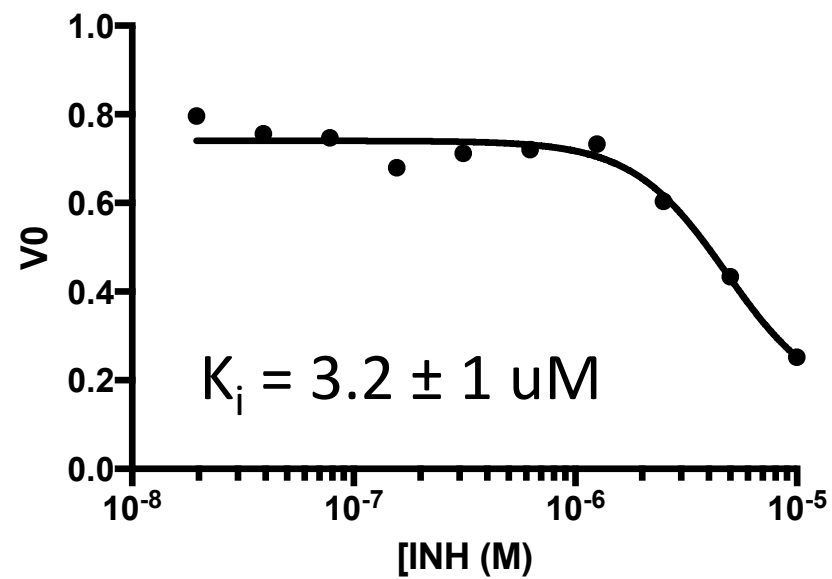

# P2: Pro

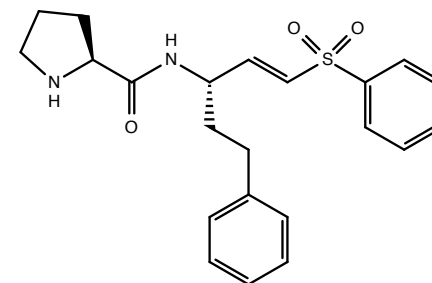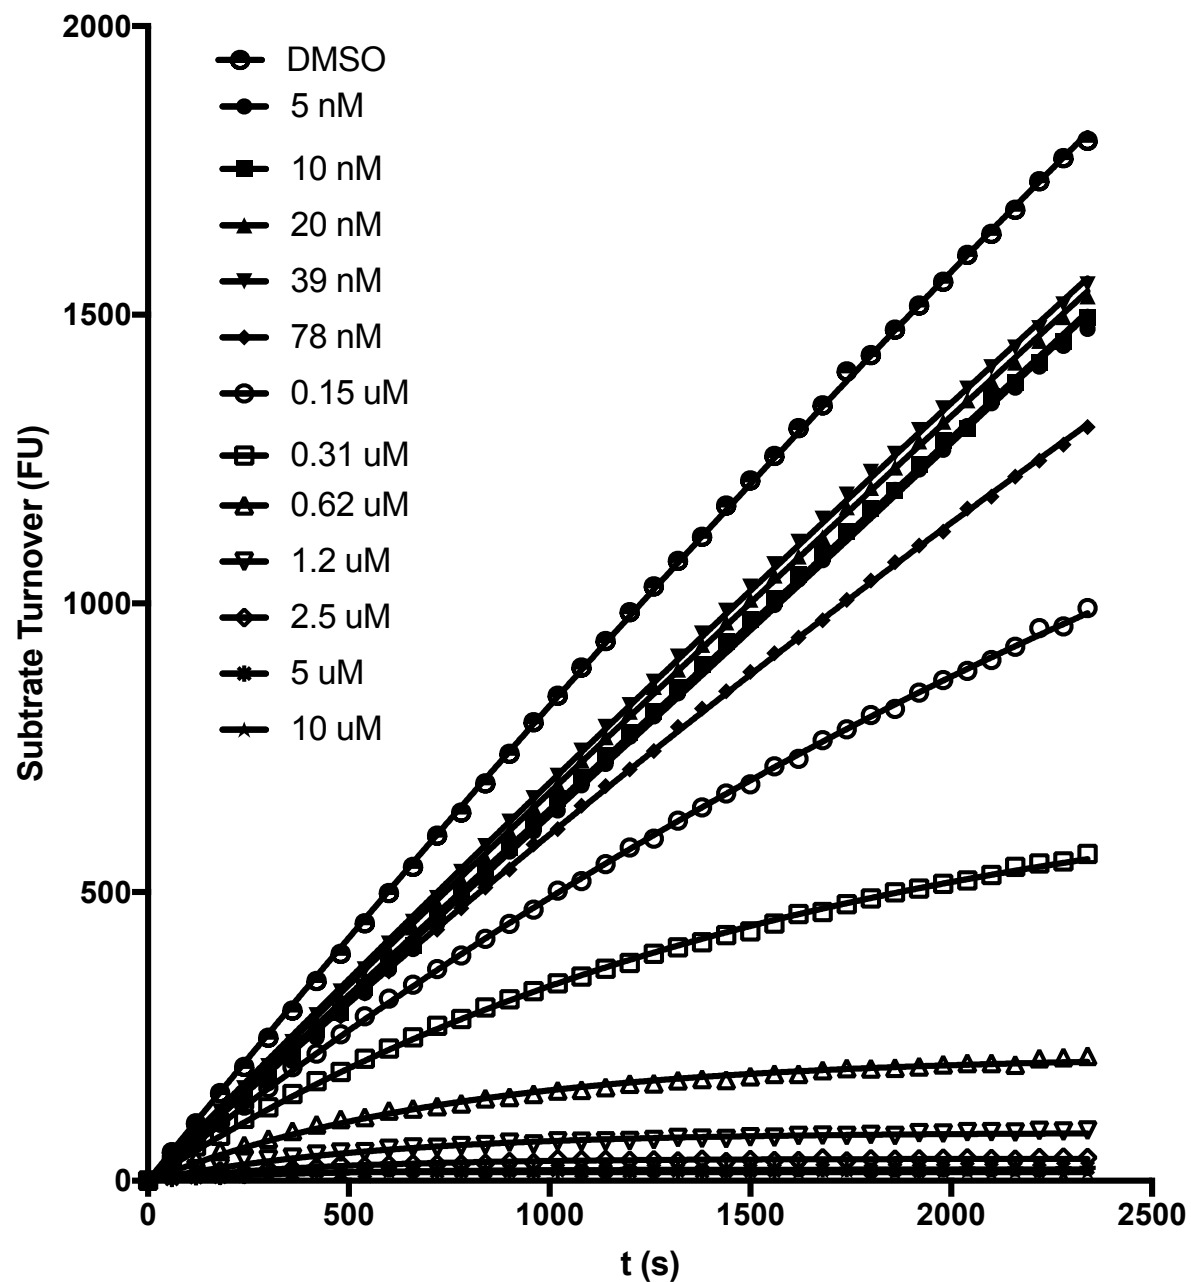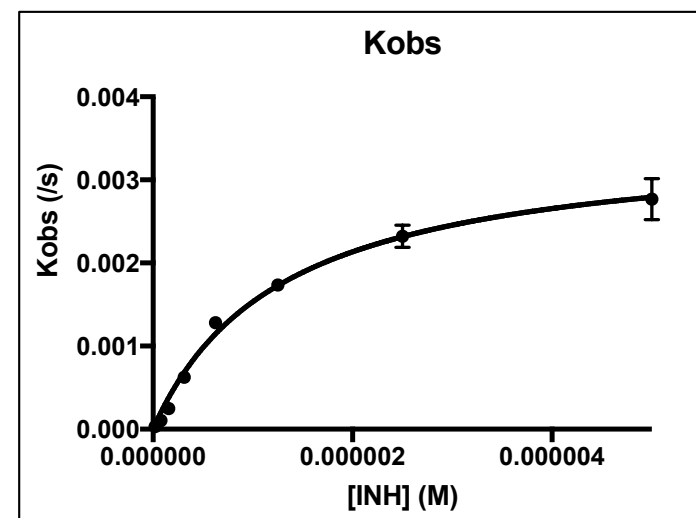

$$k_{\text{inact}} = 0.0035 \pm 0.0002 \text{ s}^{-1}$$

$$K_i = 860 \pm 100 \text{ nM}$$

$$K_{\text{inact}}/K_i = 4080 \pm 320 \text{ M}^{-1}\text{s}^{-1}$$

# P2: hPro

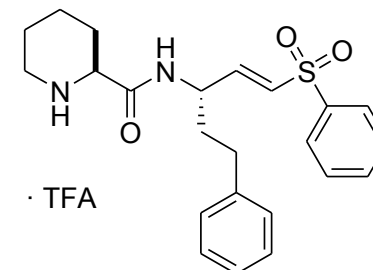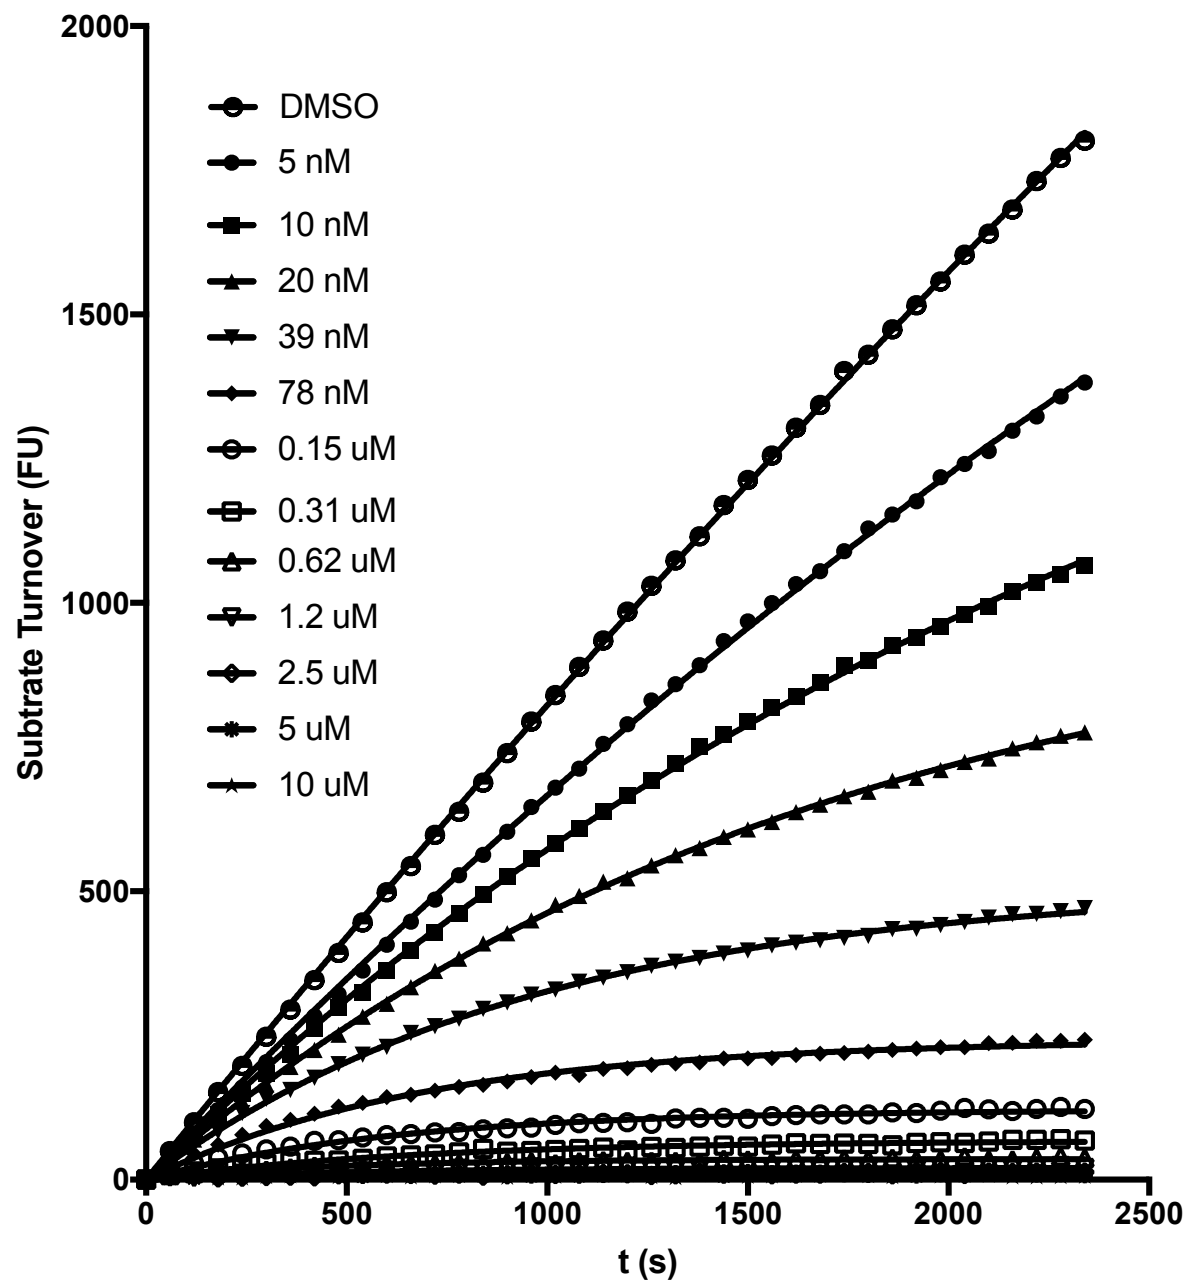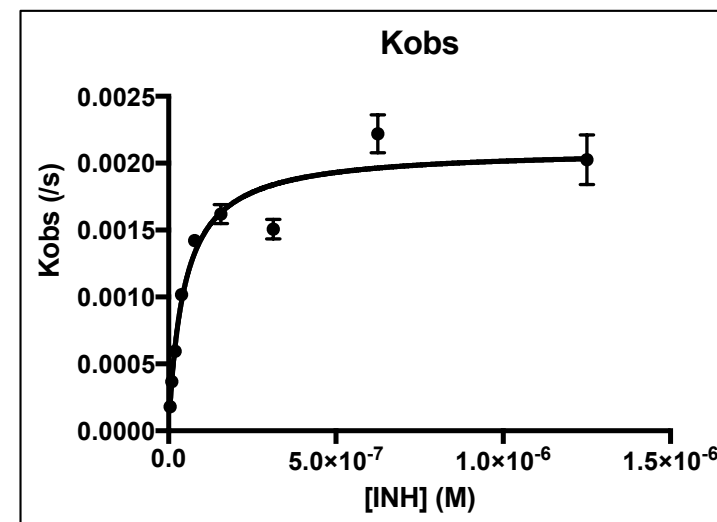

$$k_{inact} = 0.0021 \pm 0.0001 \text{ s}^{-1}$$
$$K_i = 30 \pm 7 \text{ nM}$$
$$K_{inact}/K_i = 69200 \pm 13200 \text{ M}^{-1}\text{s}^{-1}$$

# P2: hPro, P1:nLeu(O-Bzl)

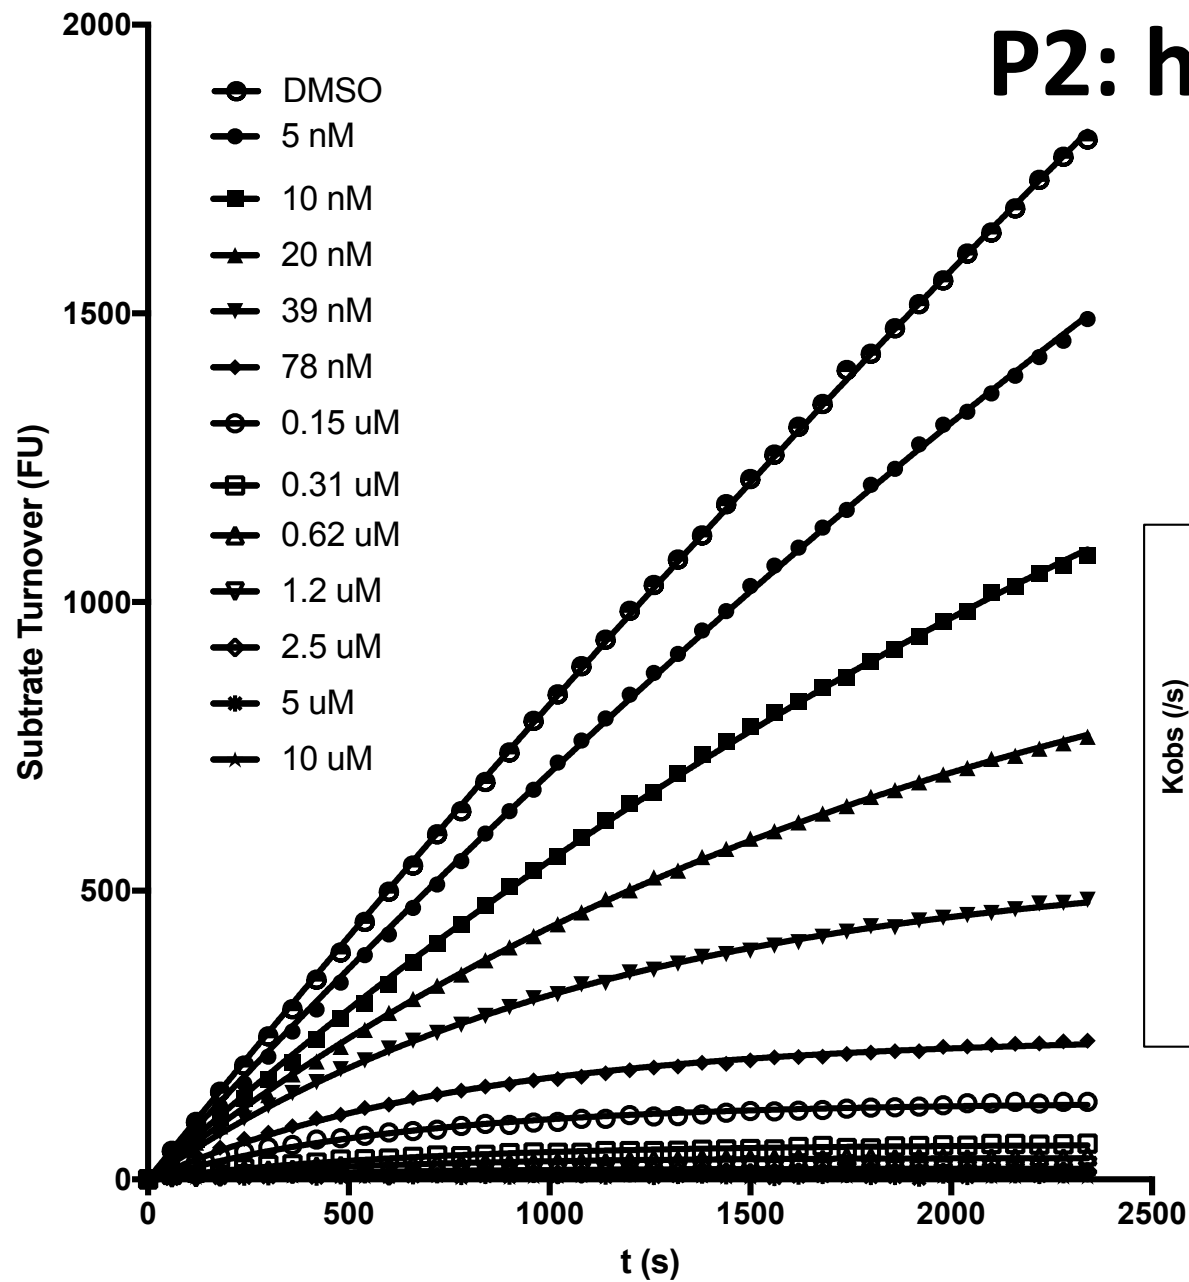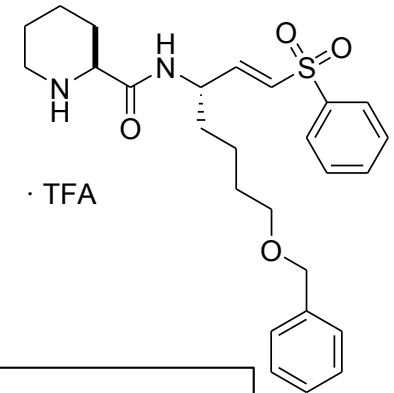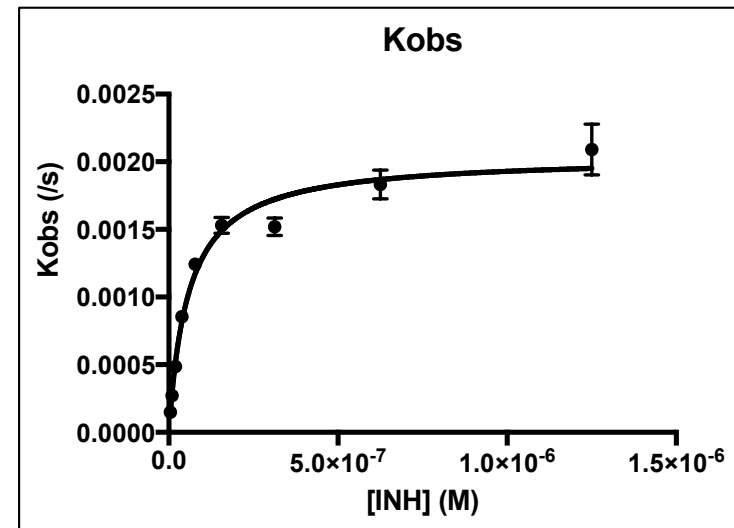

$$k_{\text{inact}} = 0.0020 \pm 0.00008 \text{ s}^{-1}$$
$$K_i = 39 \pm 6 \text{ nM}$$
$$K_{\text{inact}}/K_i = 53000 \pm 6500 \text{ M}^{-1}\text{s}^{-1}$$

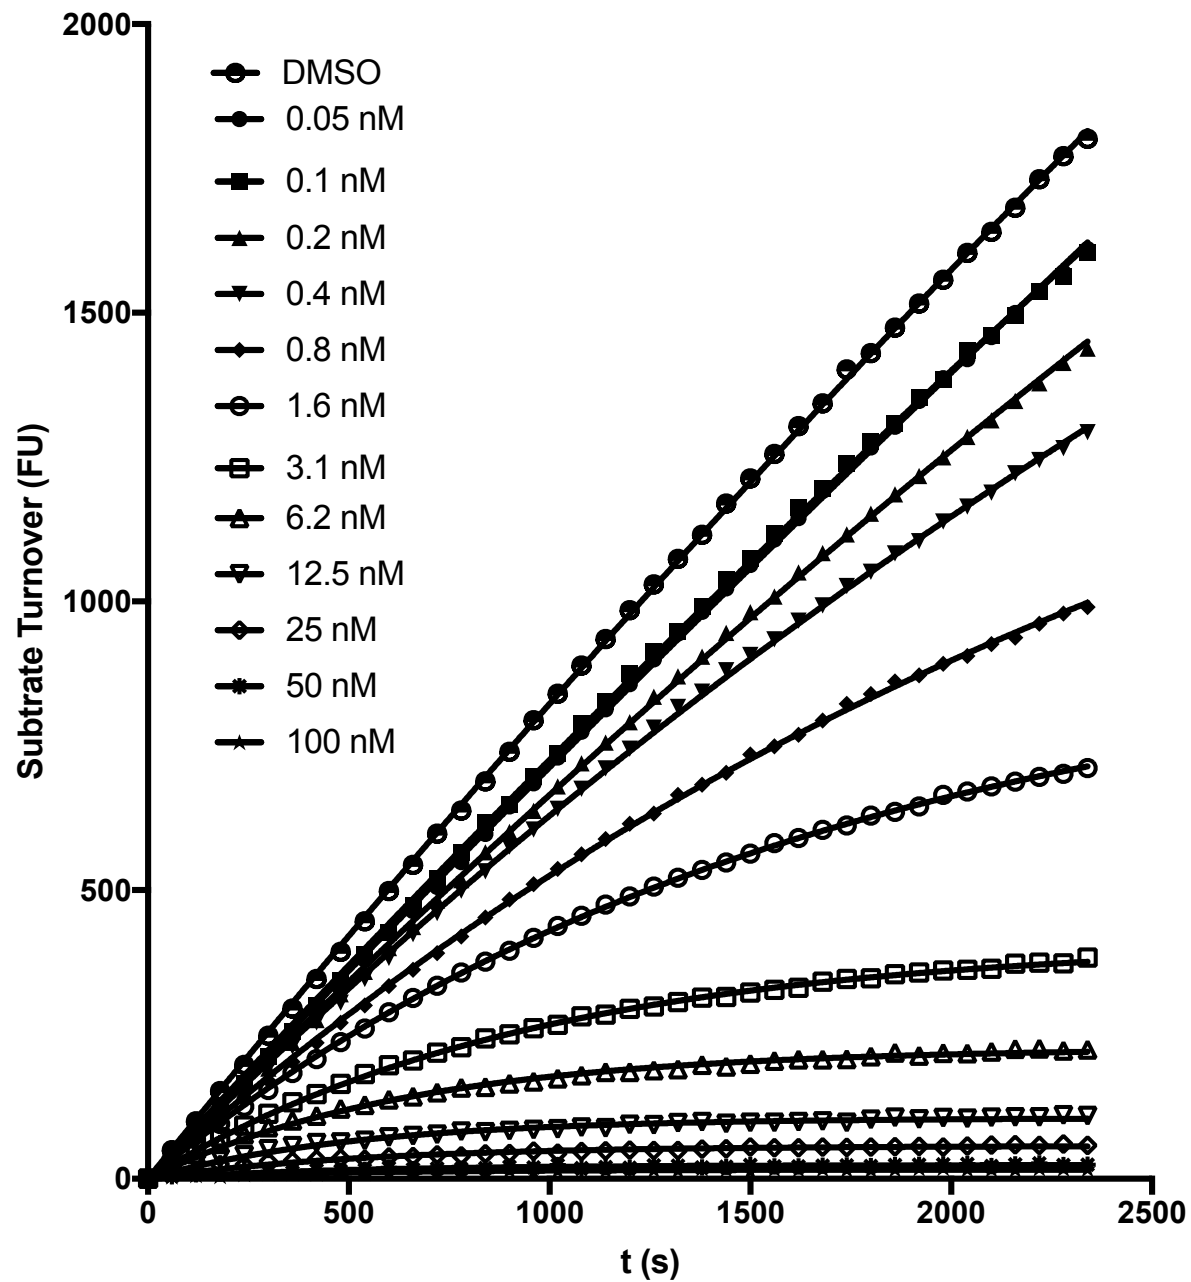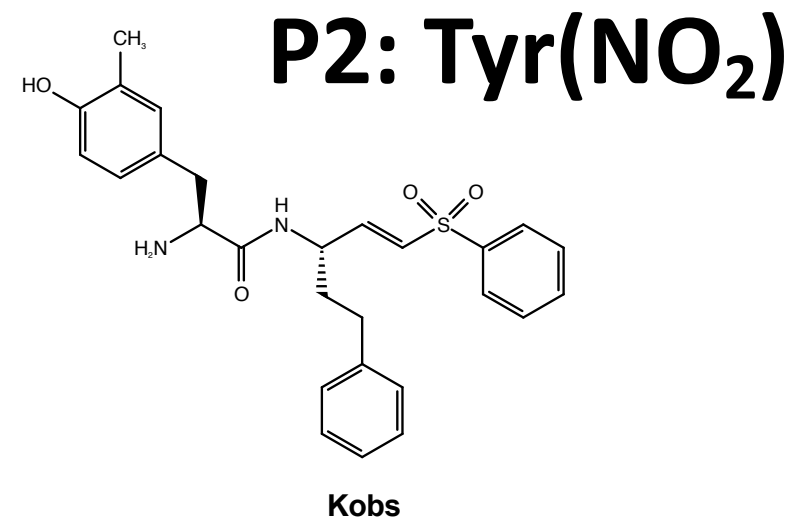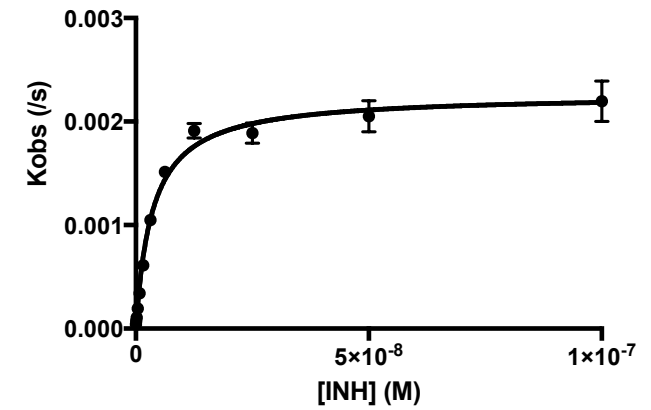

$$k_{\text{inact}} = 0.00226 \pm 0.00005 \text{ s}^{-1}$$

$$K_i = 2.4 \pm 0.2 \text{ nM}$$

$$K_{\text{inact}}/K_i = 949600 \pm 73500 \text{ M}^{-1}\text{s}^{-1}$$

# P2: Tyr(NO<sub>2</sub>), P1:nLeu(O-Bzl)

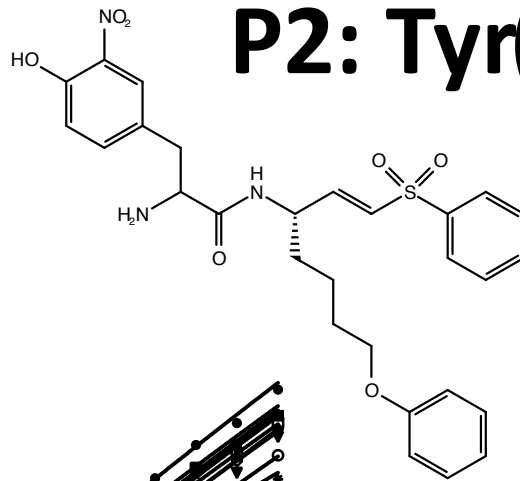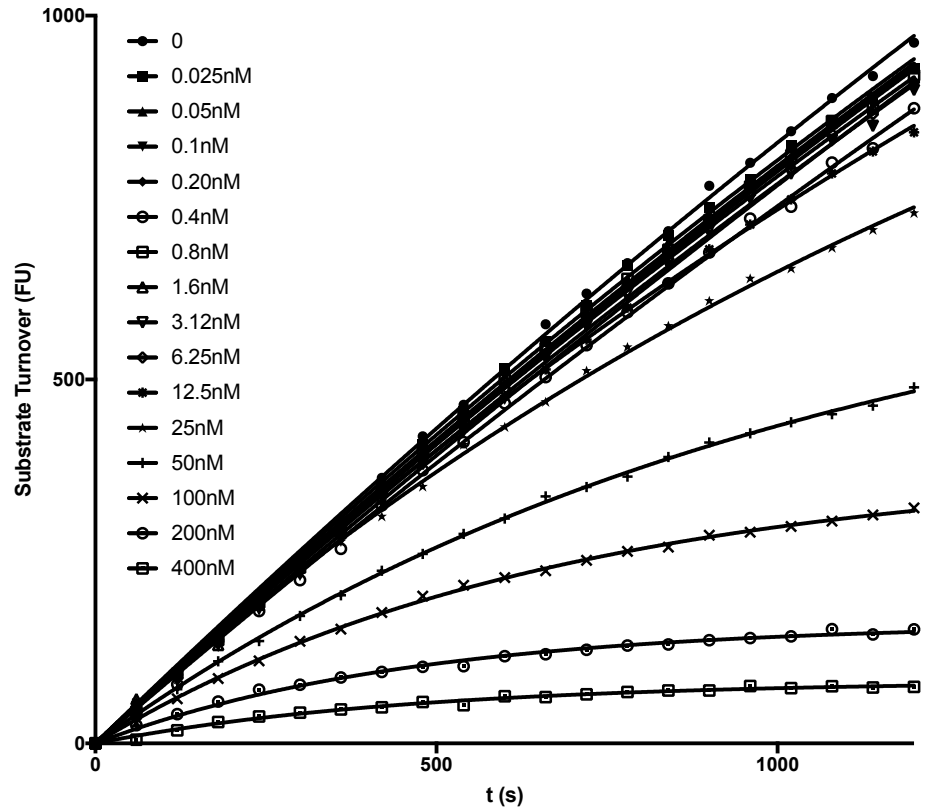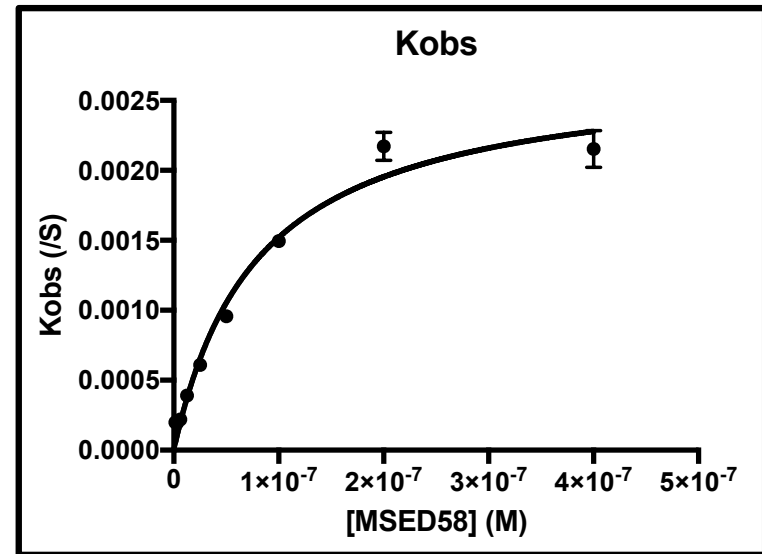

$$k_{\text{inact}} = 0.0027 \pm 0.0002 \text{ s}^{-1}$$
$$K_i = 80 \pm 15 \text{ nM}$$
$$K_{\text{inact}}/K_i = 34250 \pm 4700 \text{ M}^{-1}\text{s}^{-1}$$



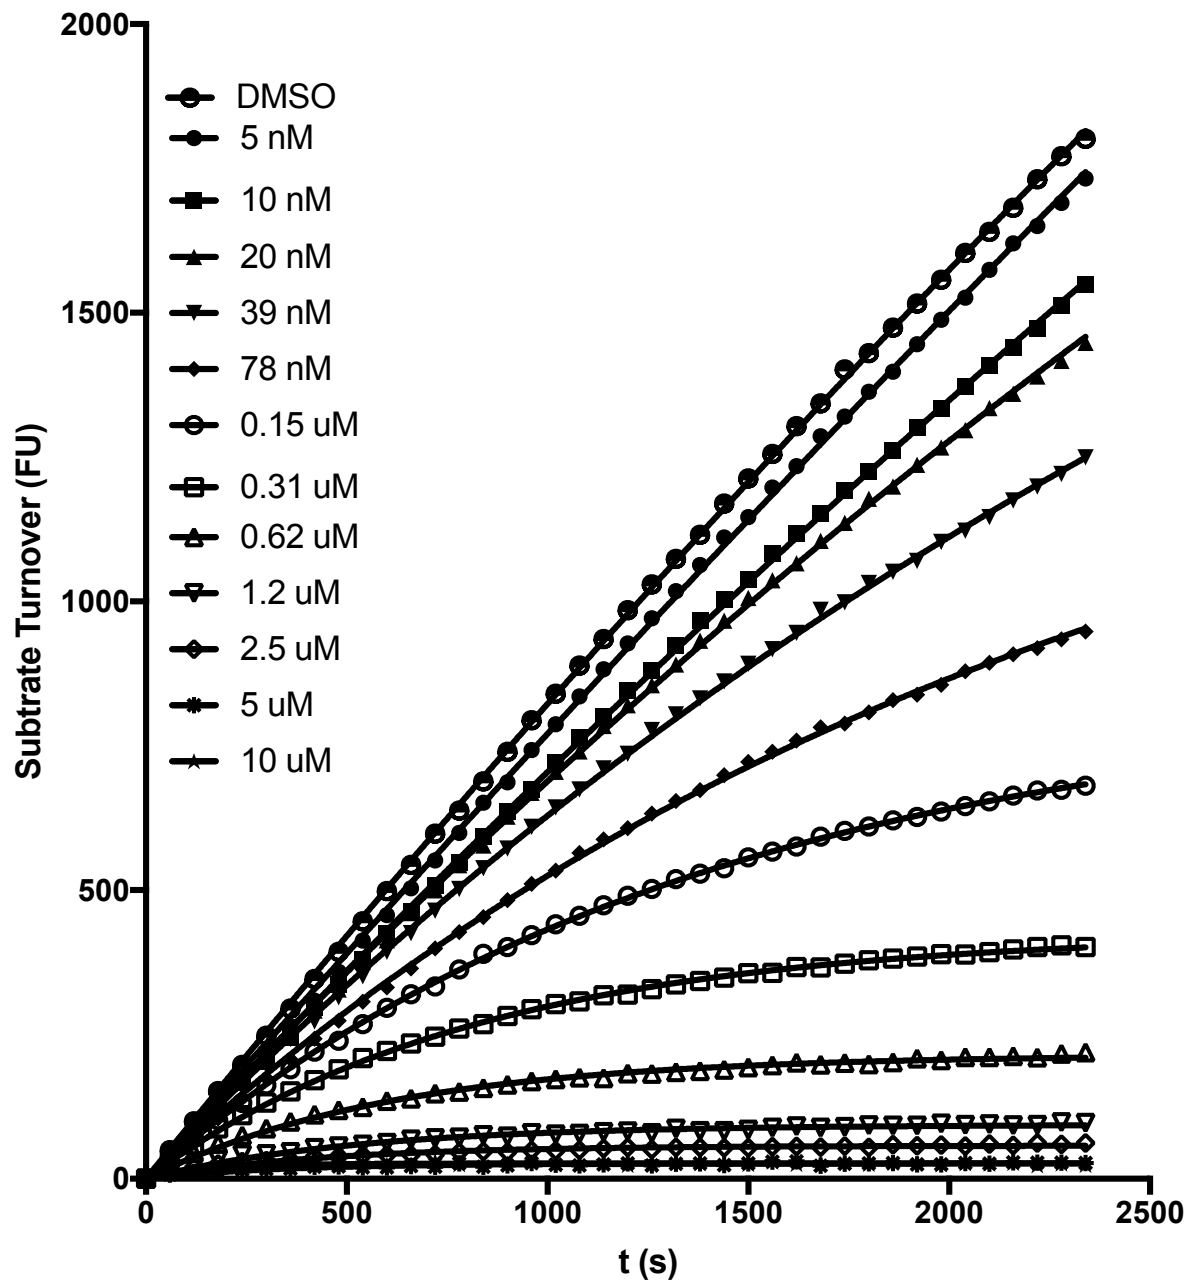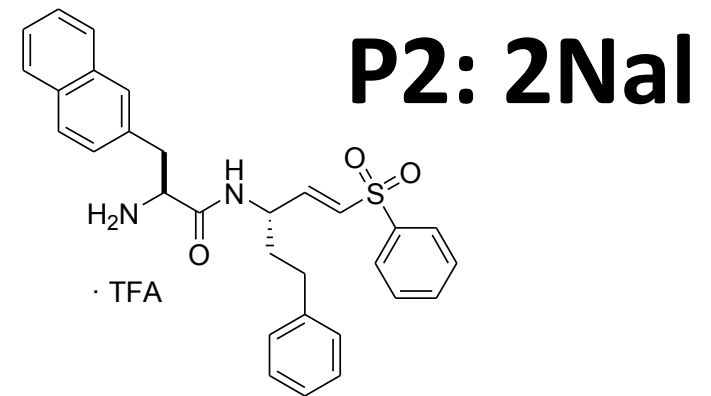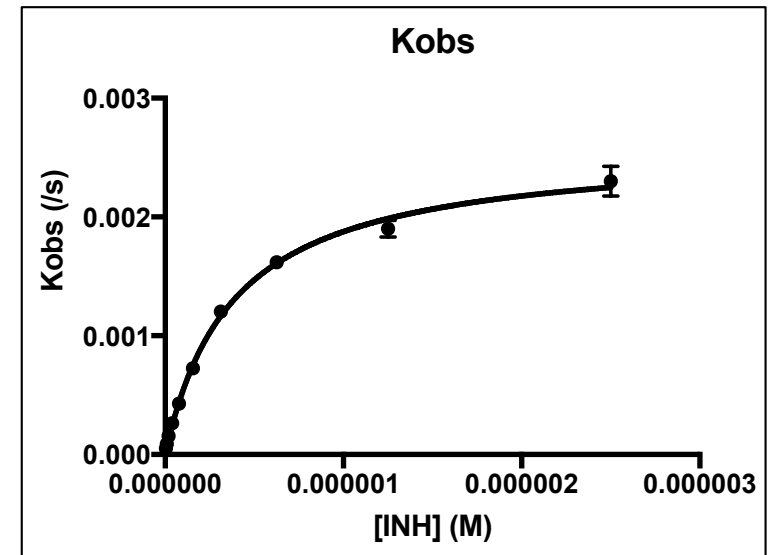

$$k_{\text{inact}} = 0.00259 \pm 0.00007 \text{ s}^{-1}$$

$$K_i = 254 \pm 16 \text{ nM}$$

$$K_{\text{inact}}/K_i = 10200 \pm 500 \text{ M}^{-1}\text{s}^{-1}$$

# P2: 2NaI, P1:nLeu(O-Bzl)

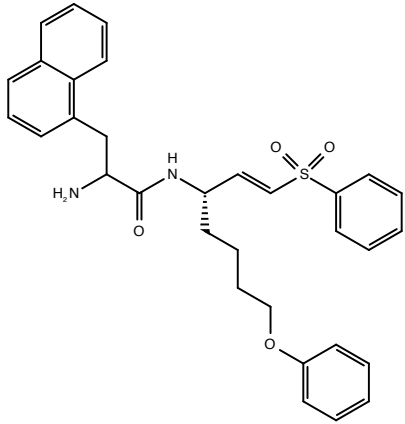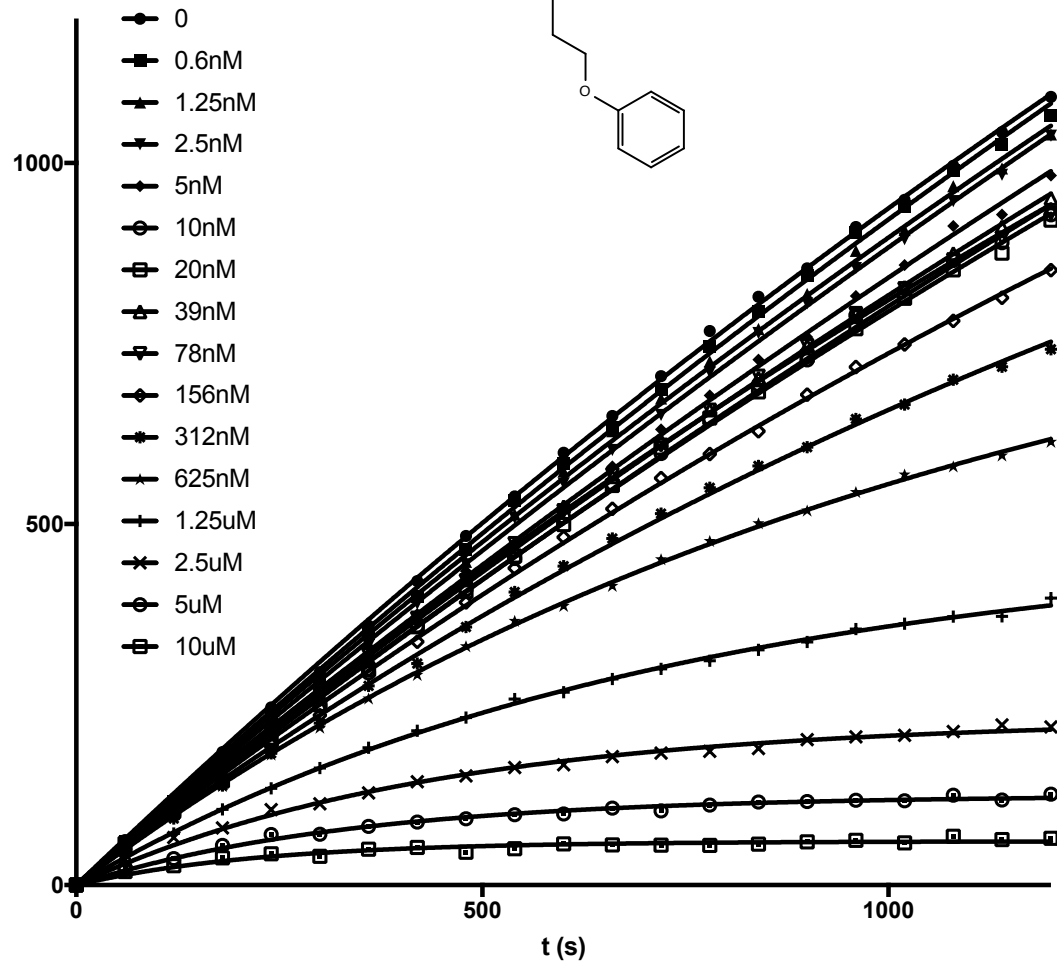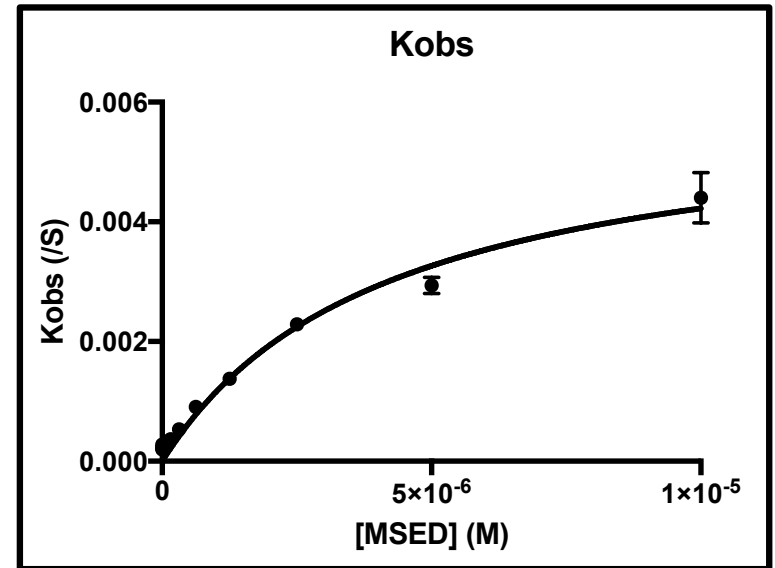

$$k_{inact} = 0.006 \pm 0.0007 \text{ s}^{-1}$$
$$K_i = 4200 \pm 100 \text{ nM}$$
$$K_{inact}/K_i = 1450 \pm 200 \text{ M}^{-1}\text{s}^{-1}$$

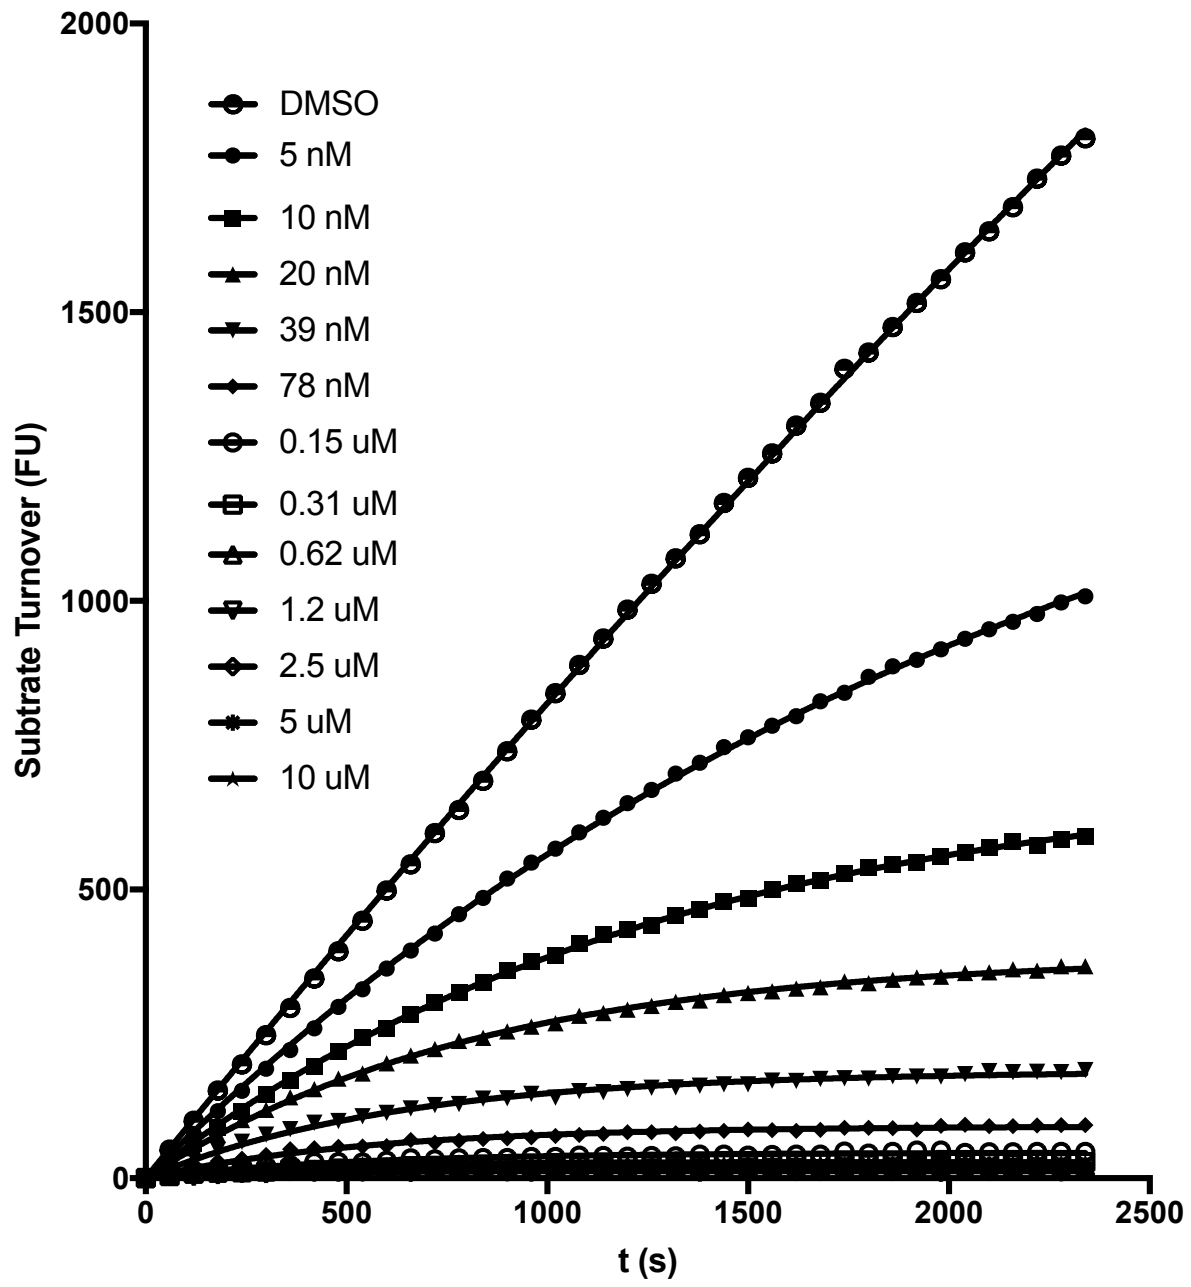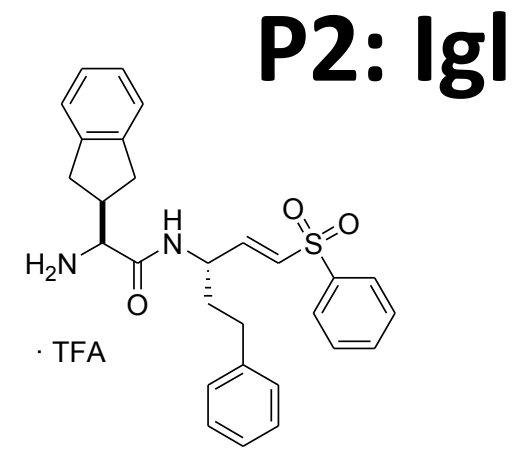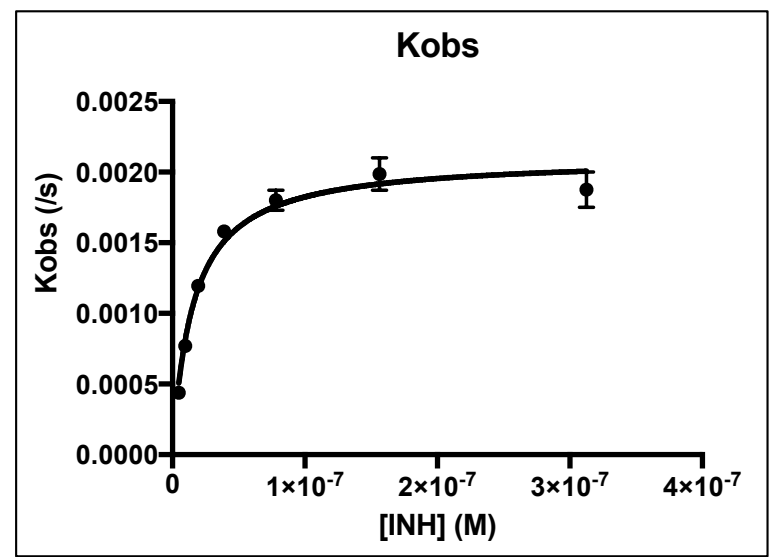

$k_{inact} = 0.0021 \pm 0.00007 \text{ s}^{-1}$   
 $K_i = 10 \pm 1 \text{ nM}$   
 $K_{inact}/K_i = 205400 \pm 22000 \text{ M}^{-1}\text{s}^{-1}$

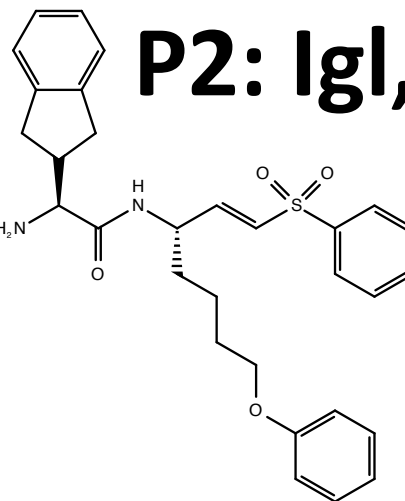

# P2: Igl, P1:nLeu(O-Bzl)

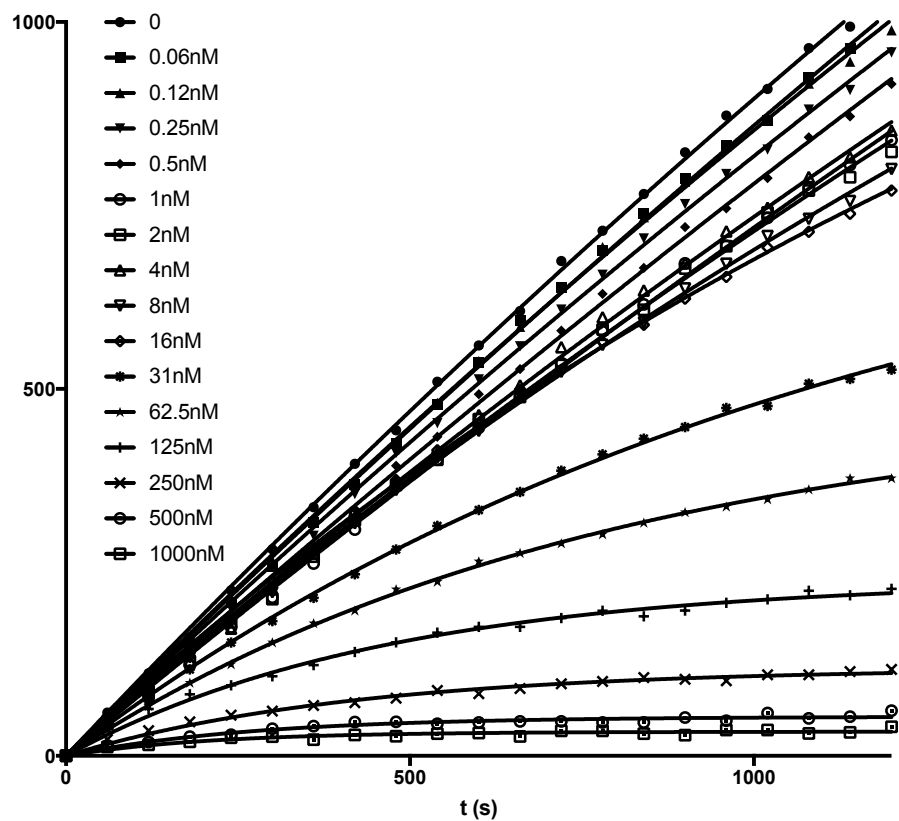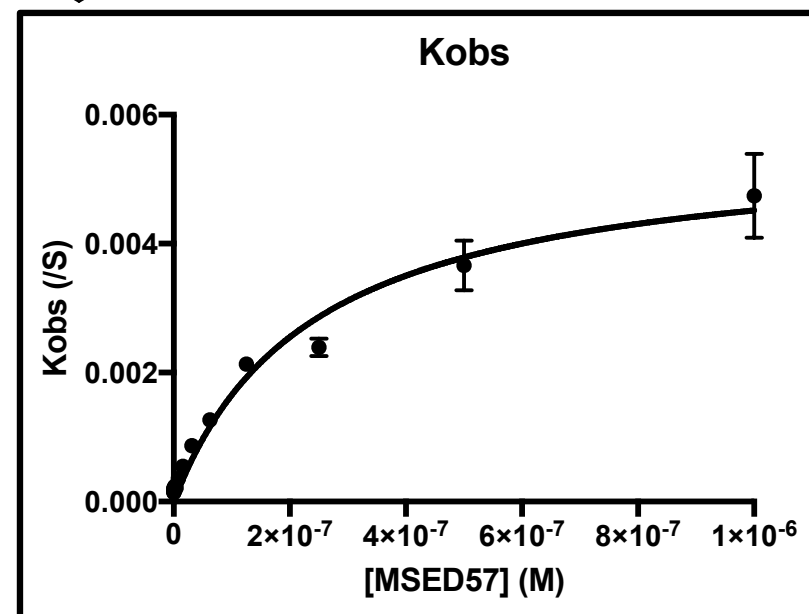

$$k_{\text{inact}} = 0.0056 \pm 0.0004 \text{ s}^{-1}$$

$$K_i = 240 \pm 40 \text{ nM}$$

$$K_{\text{inact}}/K_i = 23500 \pm 3000 \text{ M}^{-1}\text{s}^{-1}$$

# P2: Trp, P1:hPG

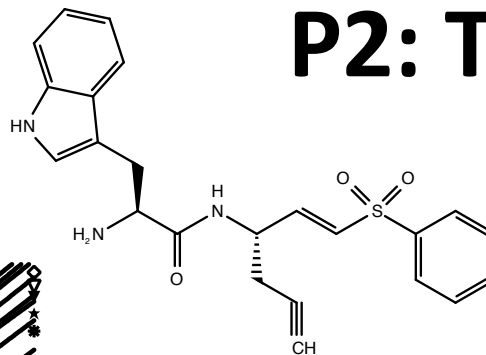

MSD21

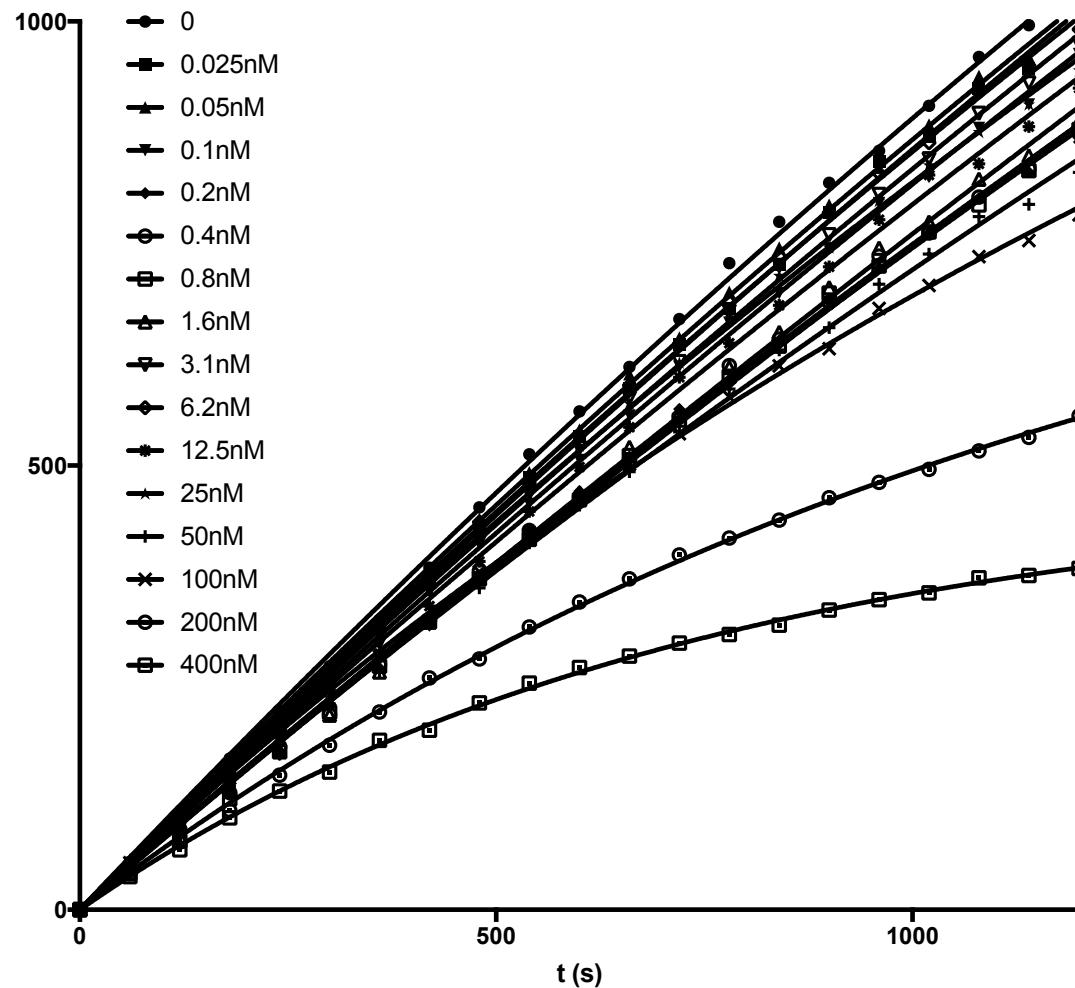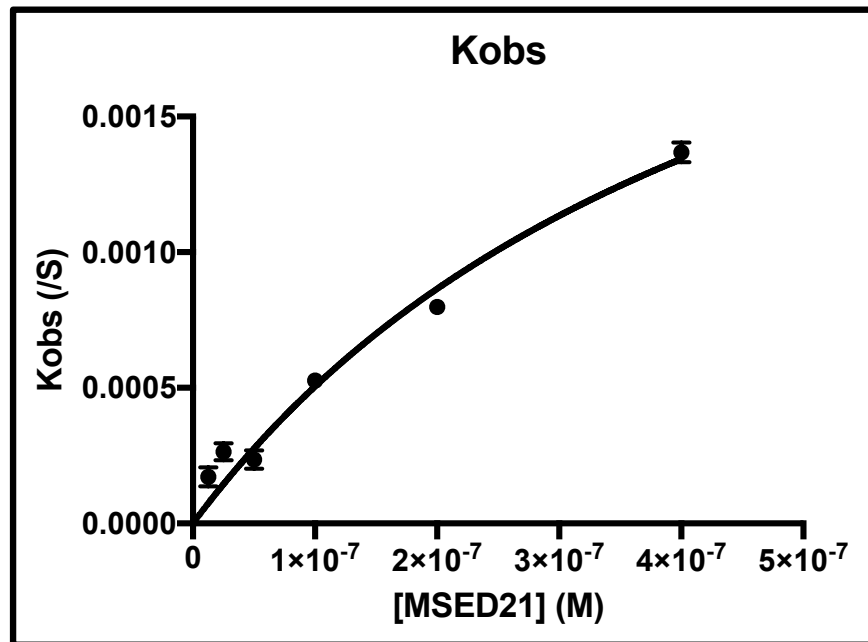

$$k_{\text{inact}} = 0.003 \pm 0.001 \text{ s}^{-1}$$
$$K_i = 500 \pm 240 \text{ nM}$$
$$K_{\text{inact}}/K_i = 6070 \pm 1100 \text{ M}^{-1}\text{s}^{-1}$$

# P2: Trp, P1:hPhe

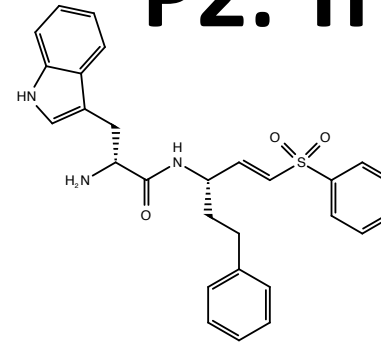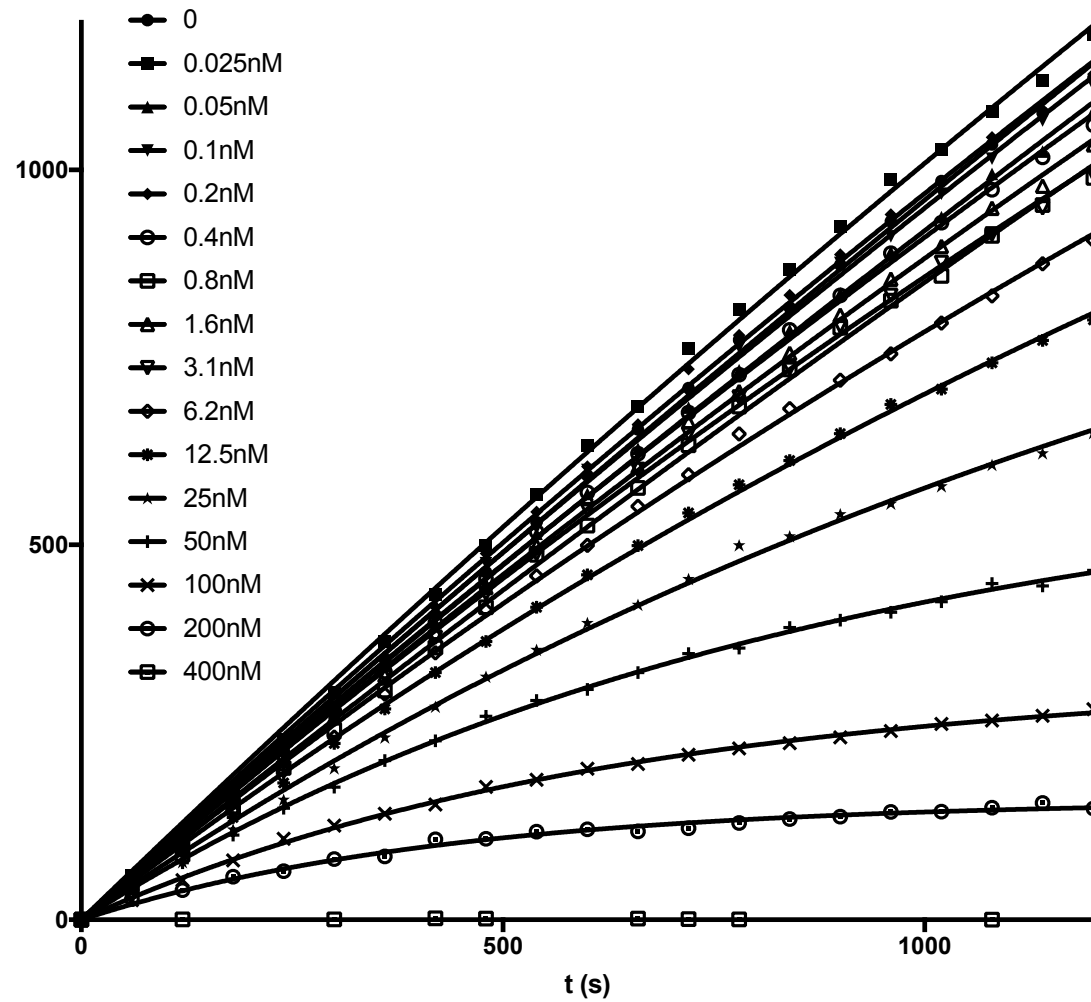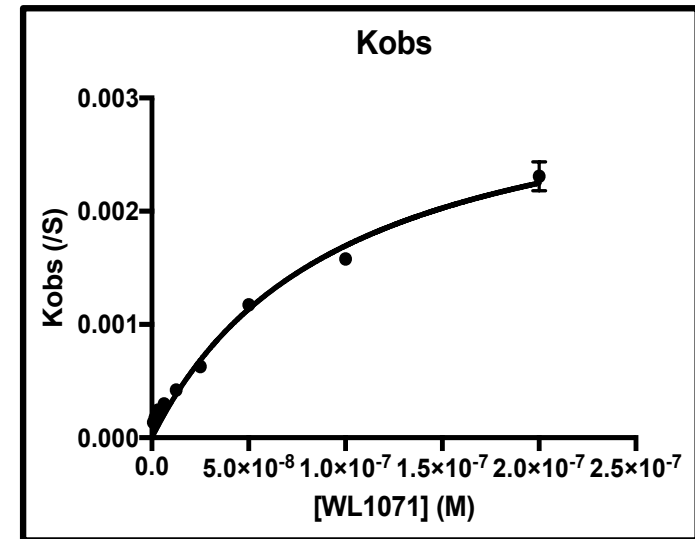

$$k_{\text{inact}} = 0.0033 \pm 0.0004 \text{ s}^{-1}$$
$$K_i = 100 \pm 20 \text{ nM}$$
$$K_{\text{inact}}/K_i = 34400 \pm 4300 \text{ M}^{-1}\text{s}^{-1}$$

# P2: Trp, P1:nLeu(O-Bzl)

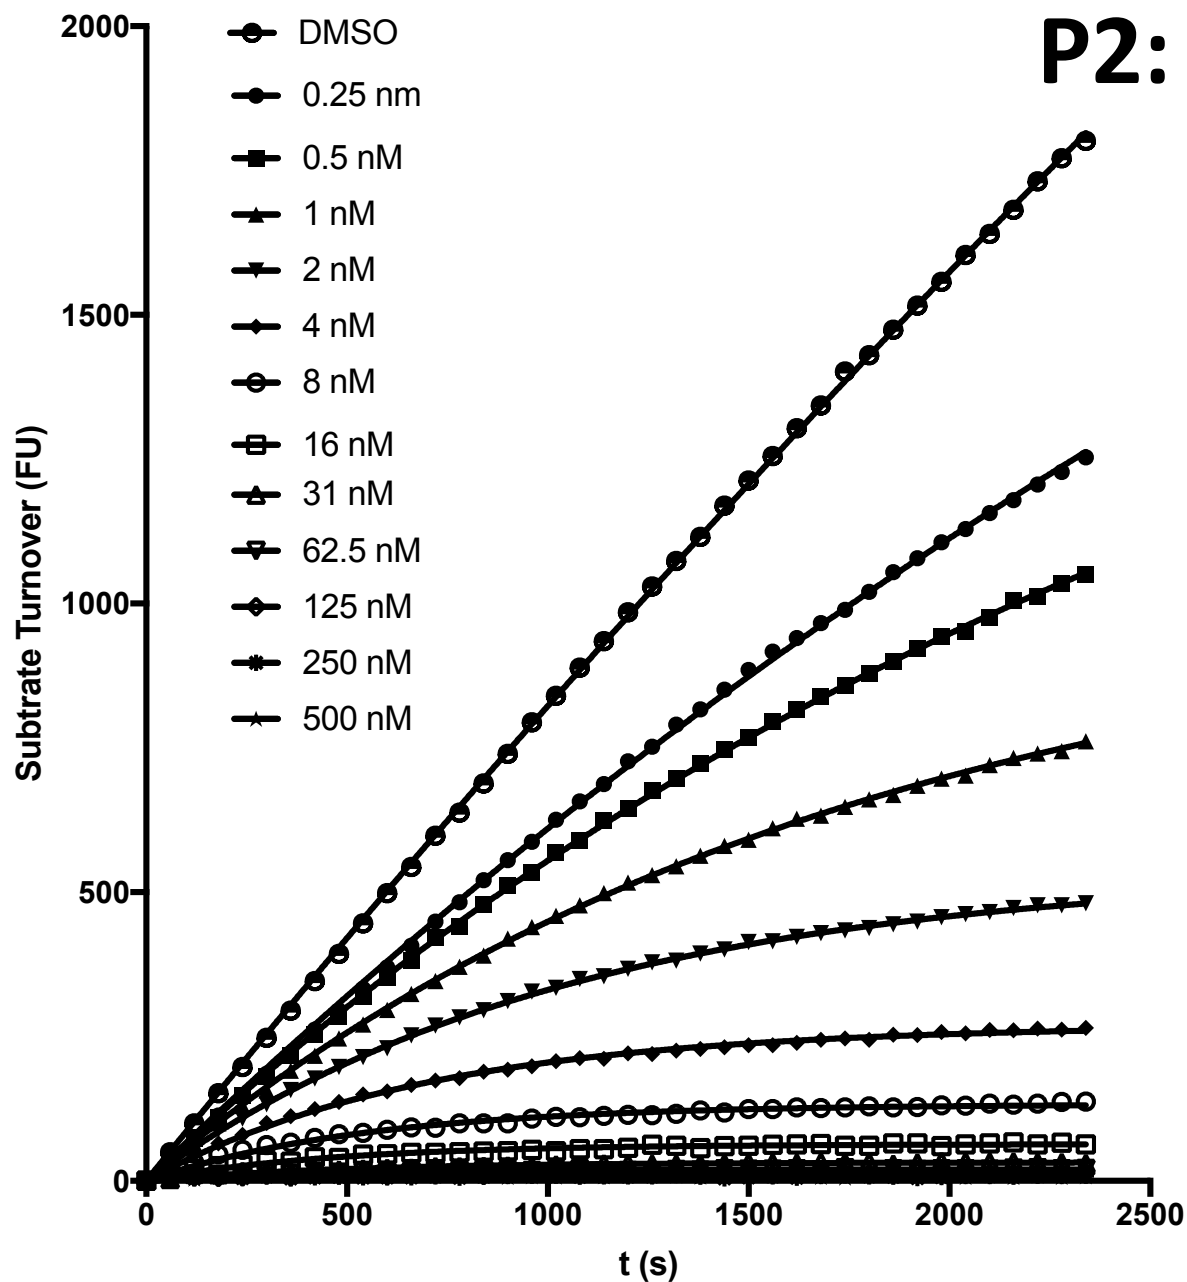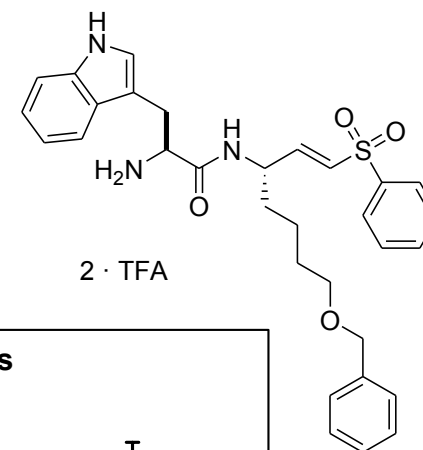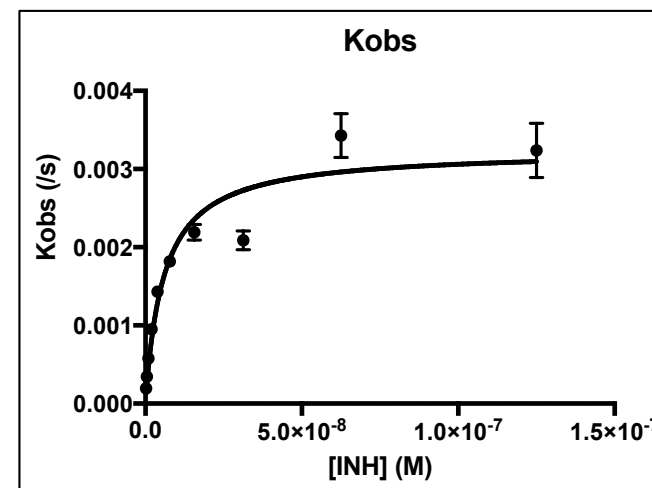

$$k_{\text{inact}} = 0.0032 \pm 0.0003 \text{ s}^{-1}$$
$$K_i = 3.9 \pm 1 \text{ nM}$$
$$K_{\text{inact}}/K_i = 826400 \pm 193000 \text{ M}^{-1}\text{s}^{-1}$$

# P2: D-Trp, P1:hPhe

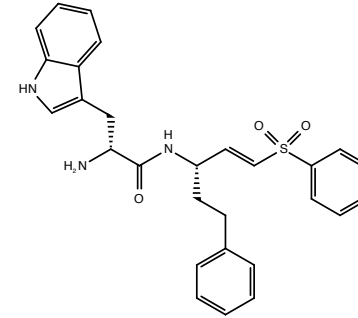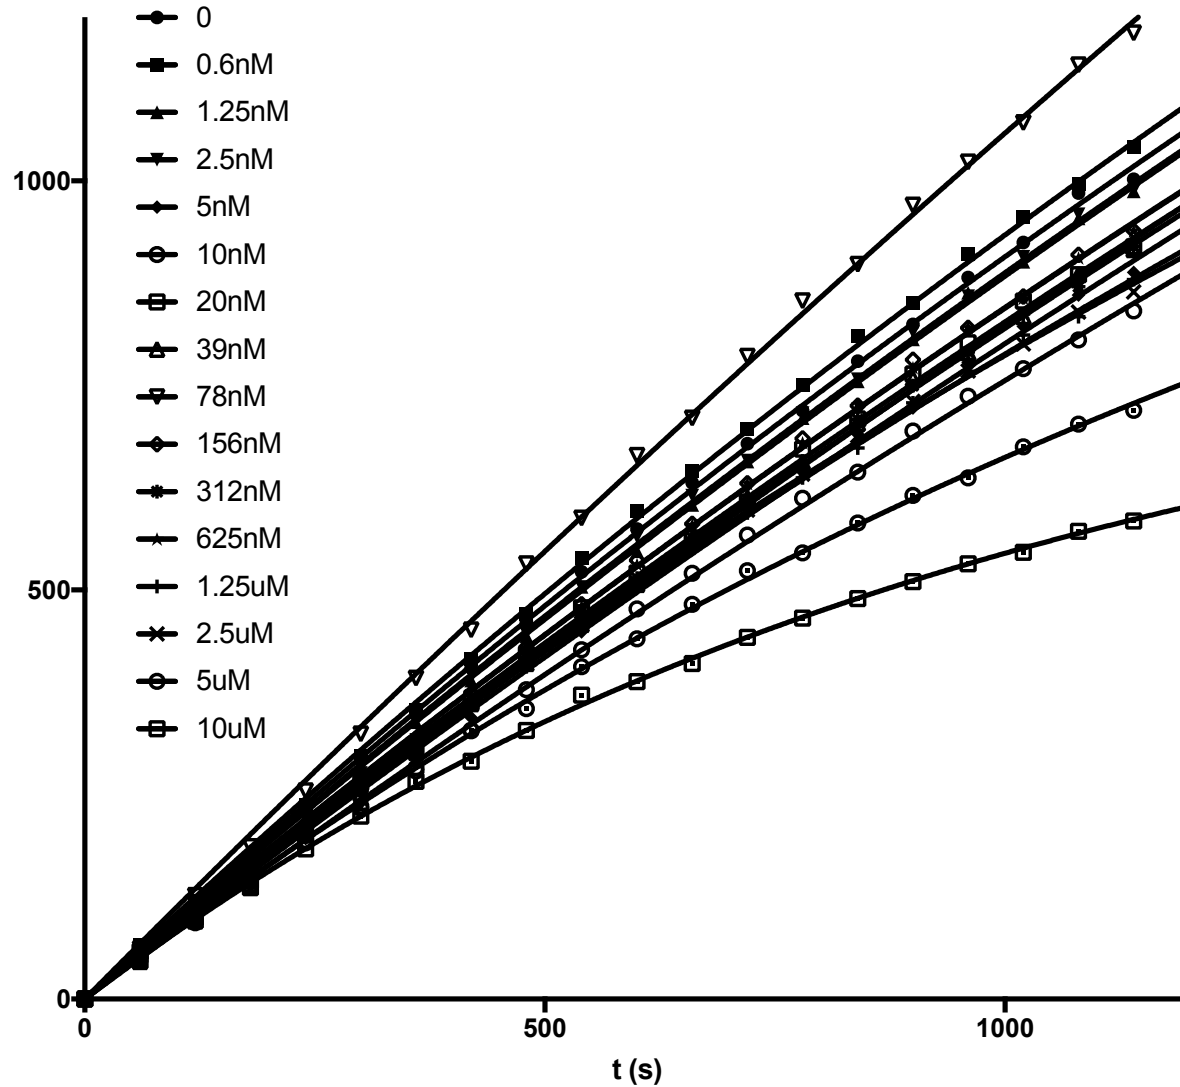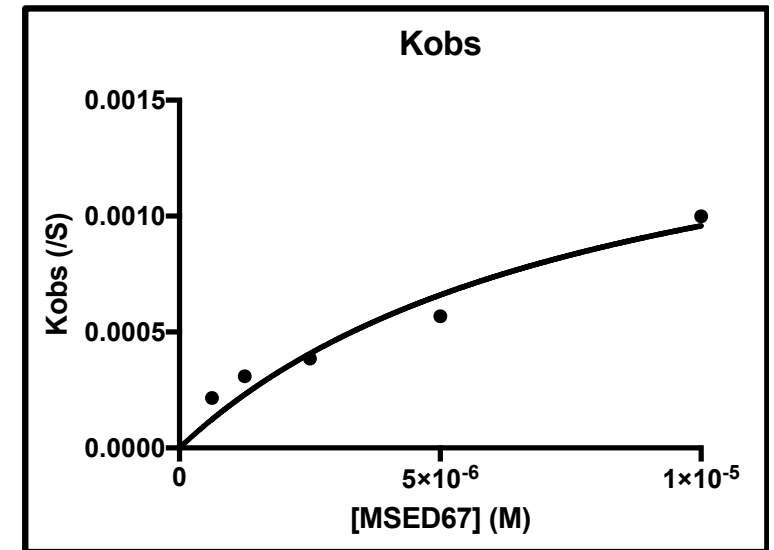

$$k_{\text{inact}} = 0.0017 \pm 0.0006 \text{ s}^{-1}$$
$$K_i = 8200 \pm 4500 \text{ nM}$$
$$K_{\text{inact}}/K_i = 210 \pm 60 \text{ M}^{-1}\text{s}^{-1}$$



# P2: *D*-Trp, P1:nLeu(O-Bzl)

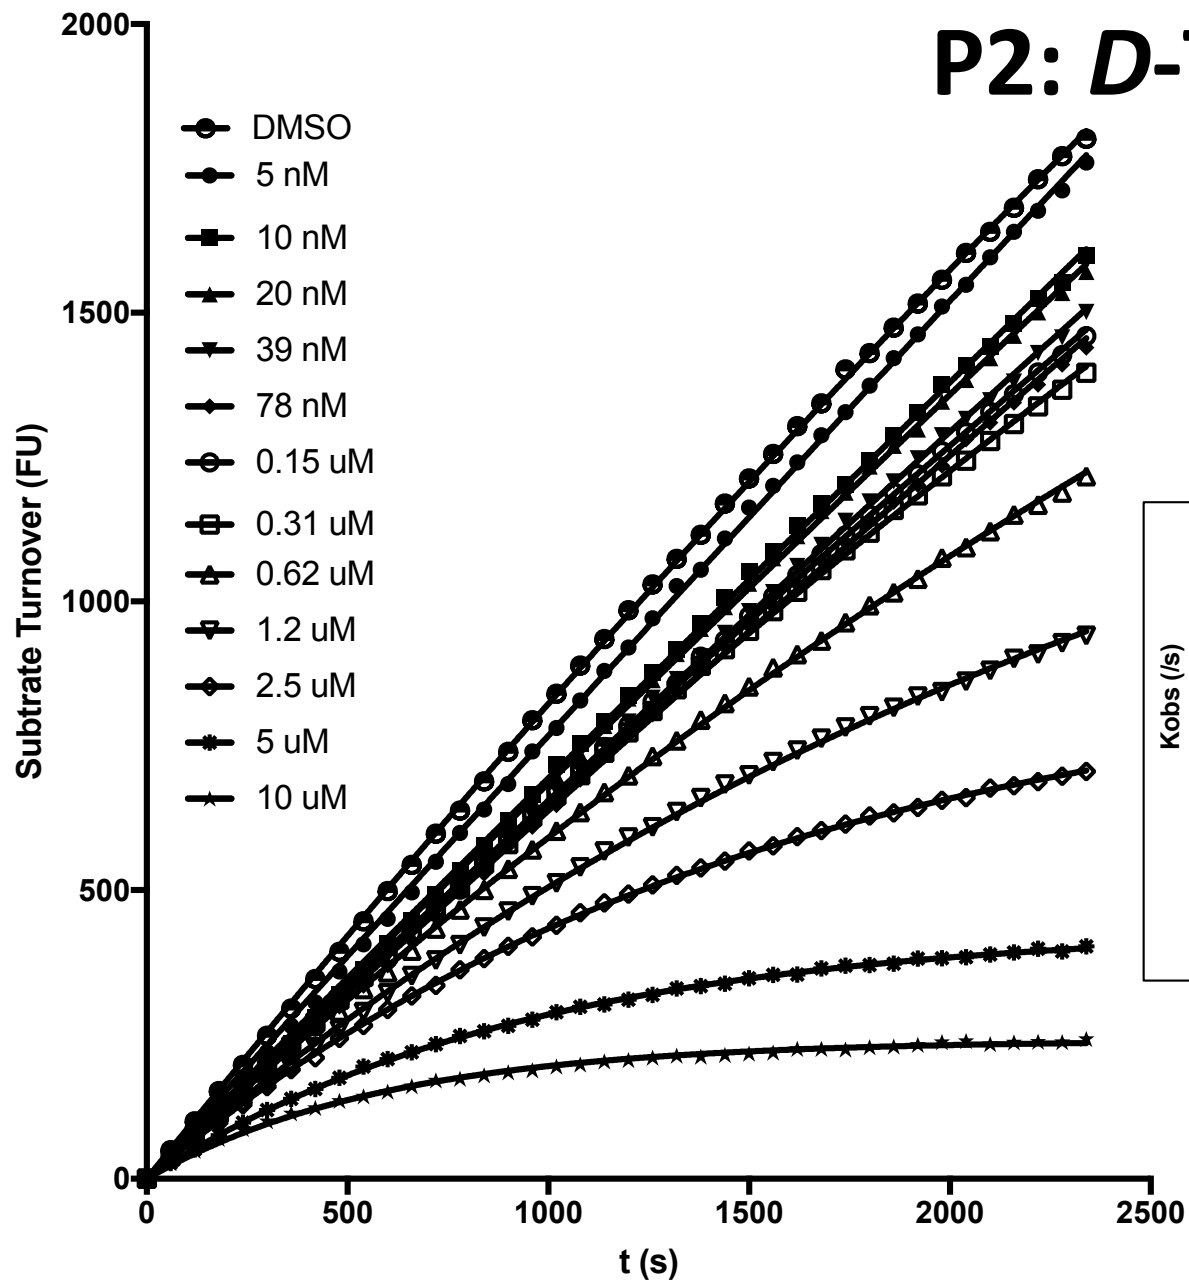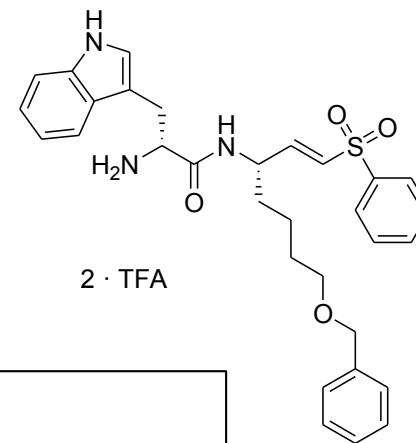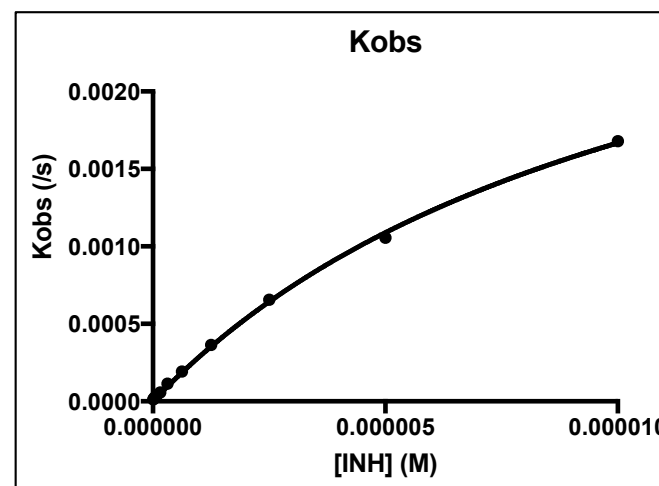

$$k_{\text{inact}} = 0.0036 \pm 0.0002 \text{ s}^{-1}$$

$$K_i = 7.6 \pm 0.6 \text{ uM}$$

$$K_{\text{inact}}/K_i = 470 \pm 13 \text{ M}^{-1}\text{s}^{-1}$$

**Fig. S3**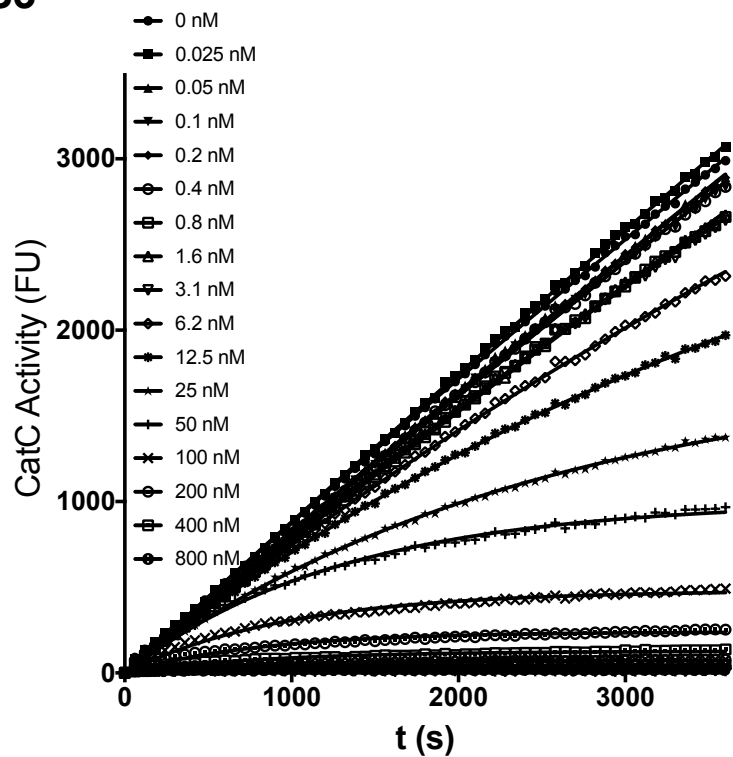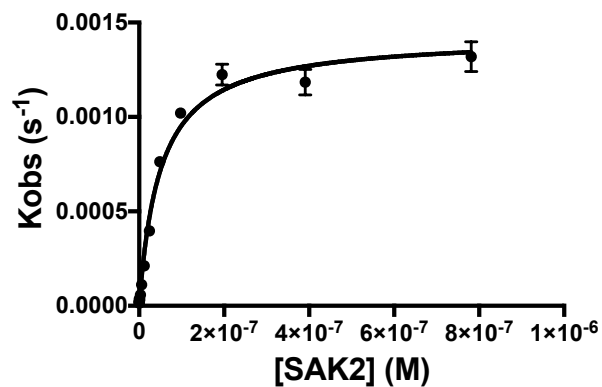

$$k_{inact} = 0.00145 \pm 0.00007 \text{ s}^{-1}$$
$$K_i = 0.034 \pm 0.005 \text{ }\mu\text{M}$$
$$K_{inact}/K_i = 42000 \pm 5000 \text{ M}^{-1}\text{s}^{-1}$$

**P2: Pro,**  
**P1: hPhe**

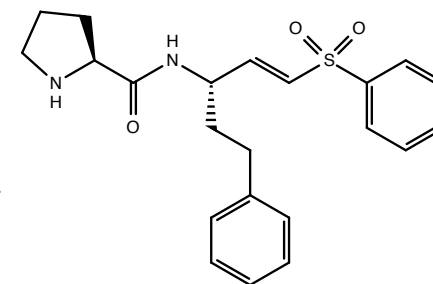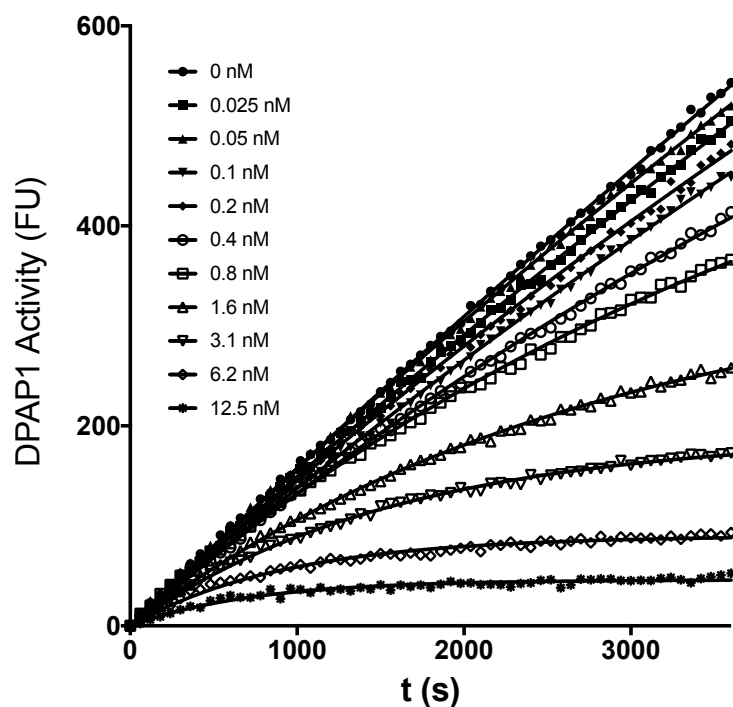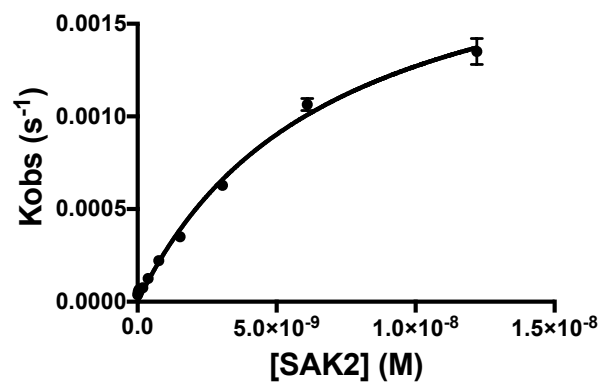

$$k_{inact} = 0.0021 \pm 0.0002 \text{ s}^{-1}$$
$$K_i = 0.0046 \pm 0.0007 \text{ }\mu\text{M}$$
$$K_{inact}/K_i = 470000 \pm 35000 \text{ M}^{-1}\text{s}^{-1}$$

# P2: hPro, P1: hPhe

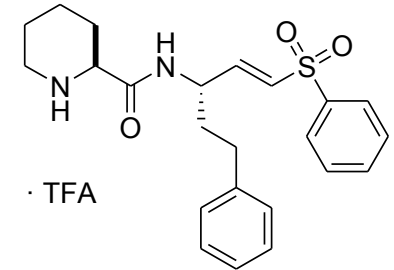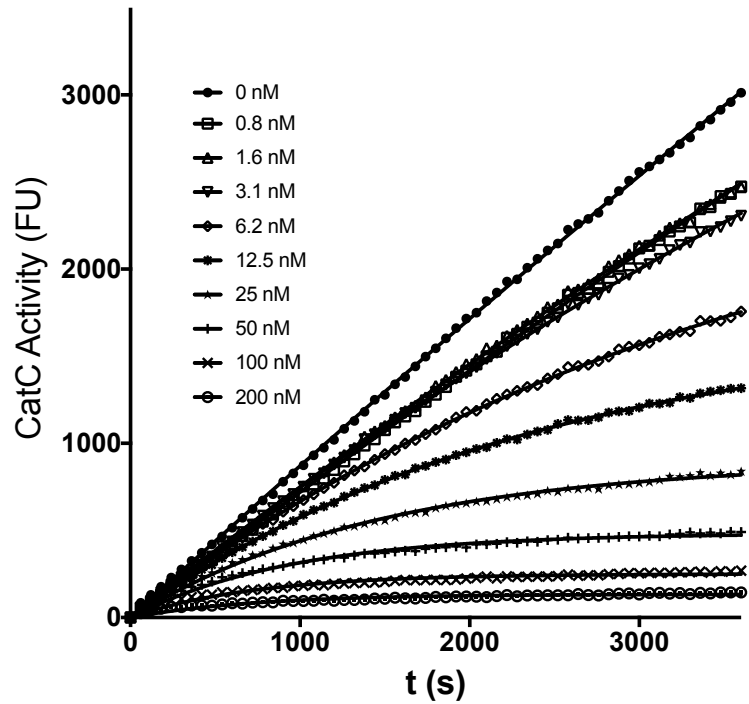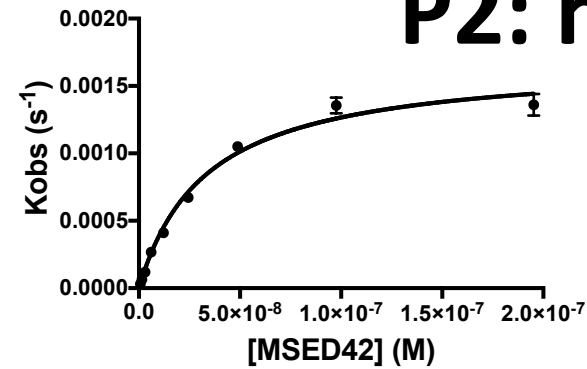

$$k_{\text{inact}} = 0.00167 \pm 0.00008 \text{ s}^{-1}$$

$$K_i = 0.022 \pm 0.003 \text{ uM}$$

$$K_{\text{inact}}/K_i = 76000 \pm 800 \text{ M}^{-1}\text{s}^{-1}$$

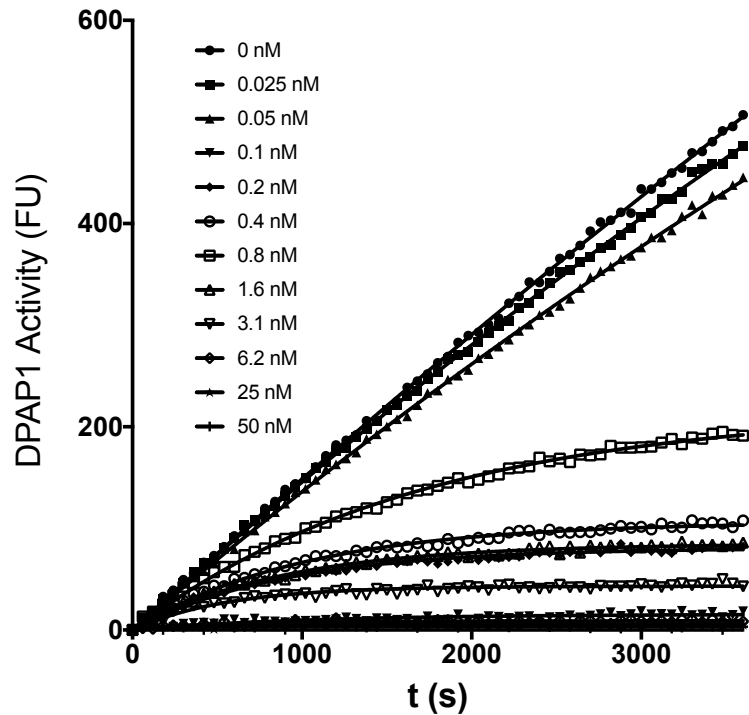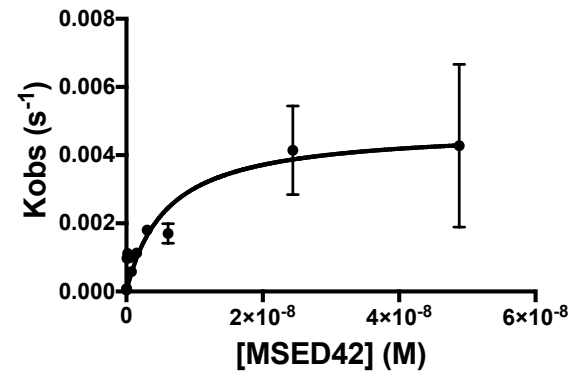

$$k_{\text{inact}} = 0.0048 \pm 0.0006 \text{ s}^{-1}$$

$$K_i = 0.0039 \pm 0.0015 \text{ uM}$$

$$K_{\text{inact}}/K_i = 1230000 \pm 400000 \text{ M}^{-1}\text{s}^{-1}$$

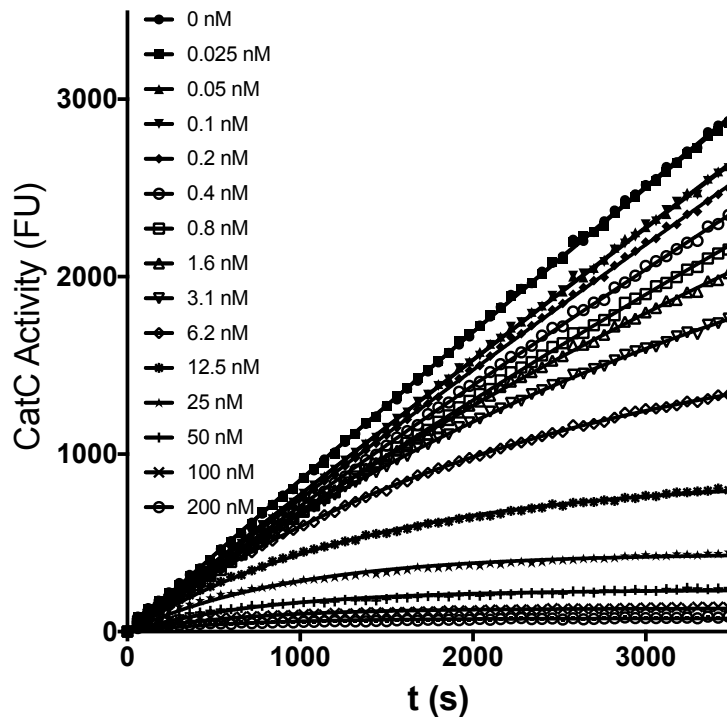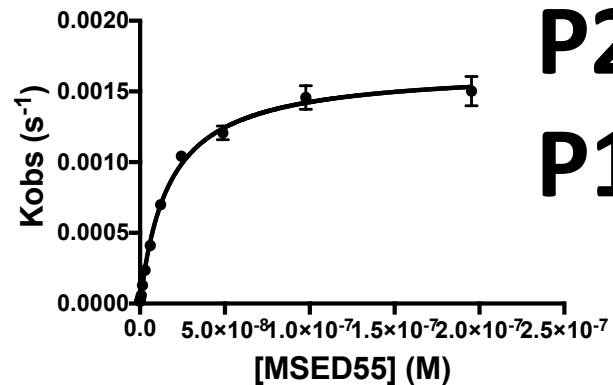

**P2: hPro,**  
**P1: nLeu(o-Bzl)**

$$k_{inact} = 0.00167 \pm 0.00003 \text{ s}^{-1}$$

$$K_i = 0.0112 \pm 0.0006 \text{ uM}$$

$$K_{inact}/K_i = 150000 \pm 6000 \text{ M}^{-1}\text{s}^{-1}$$

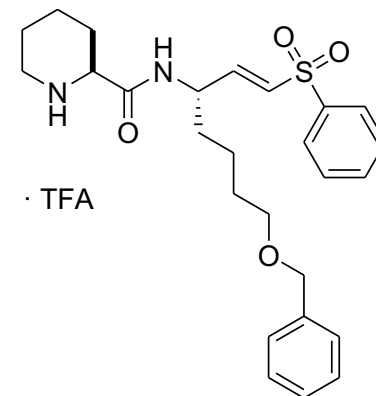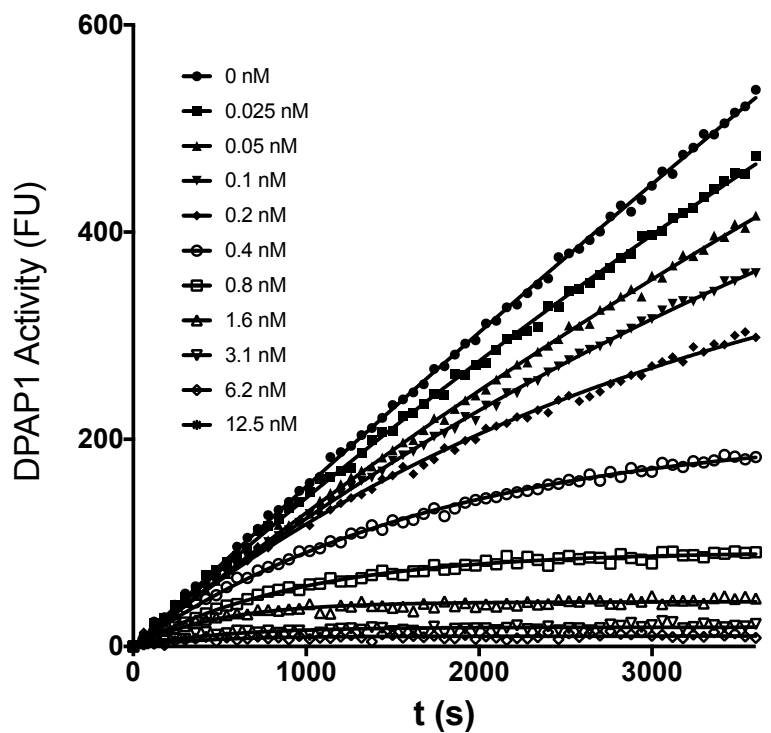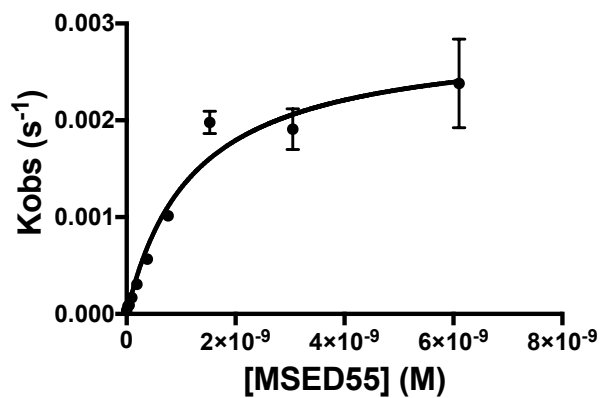

$$k_{inact} = 0.0029 \pm 0.0003 \text{ s}^{-1}$$

$$K_i = 0.0008 \pm 0.0002 \text{ uM}$$

$$K_{inact}/K_i = 3560000 \pm 150000 \text{ M}^{-1}\text{s}^{-1}$$

# P2: Tyr(NO<sub>2</sub>), P1: hPhe

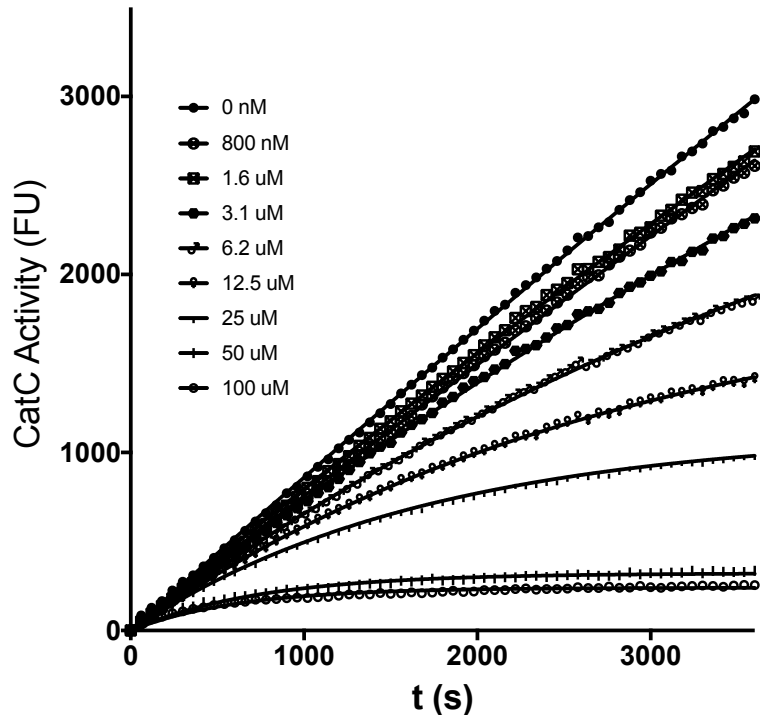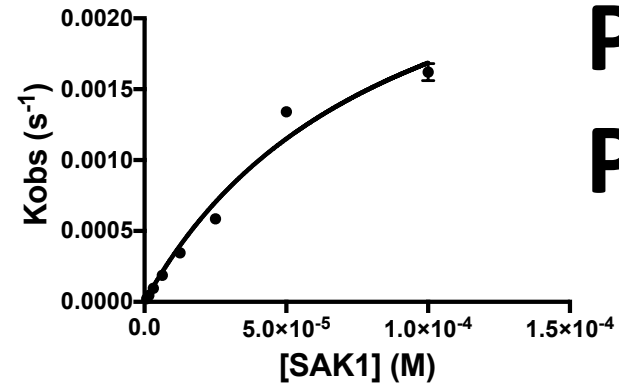

$$k_{inact} = 0.0032 \pm 0.0006 \text{ s}^{-1}$$

$$K_i = 58 \pm 20 \text{ uM}$$

$$K_{inact}/K_i = 54 \pm 8 \text{ M}^{-1}\text{s}^{-1}$$

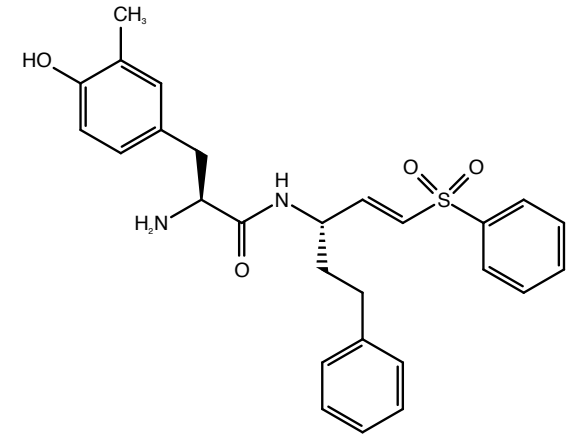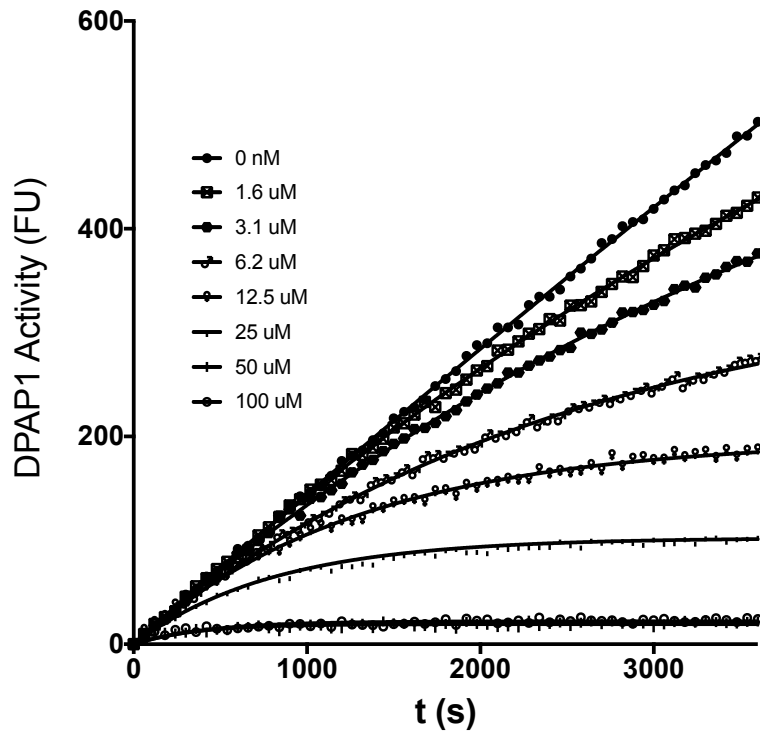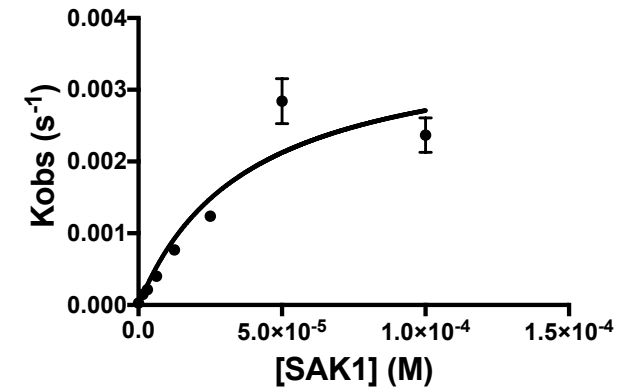

$$k_{inact} = 0.0038 \pm 0.001 \text{ s}^{-1}$$

$$K_i = 25 \pm 14 \text{ uM}$$

$$K_{inact}/K_i = 150 \pm 50 \text{ M}^{-1}\text{s}^{-1}$$

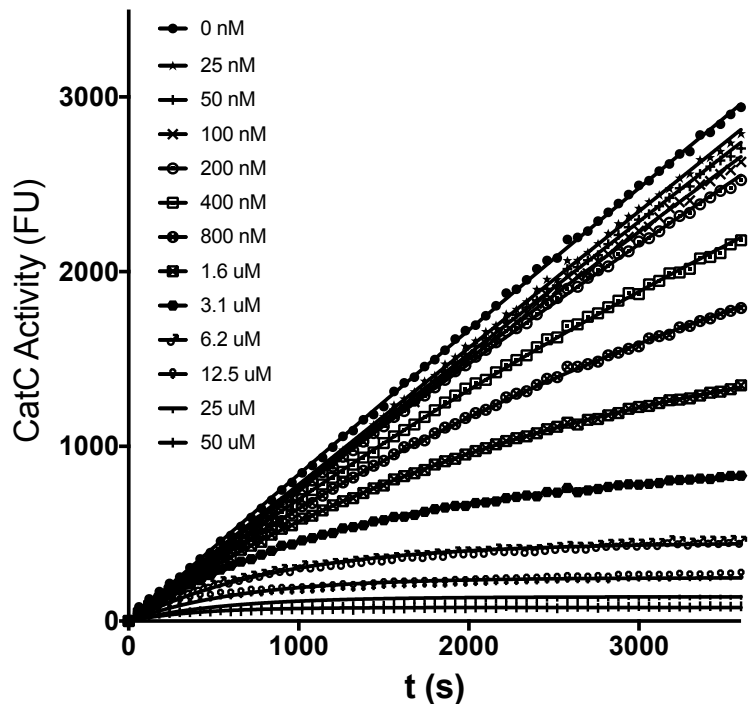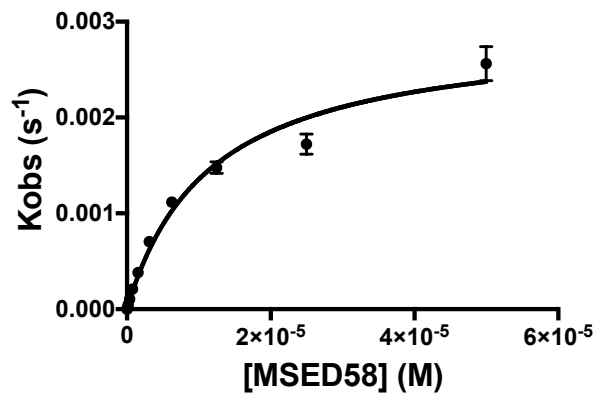

$$k_{\text{inact}} = 0.0029 \pm 0.0002 \text{ s}^{-1}$$

$$K_i = 7.7 \pm 1.5 \text{ uM}$$

$$K_{\text{inact}}/K_i = 380 \pm 50 \text{ M}^{-1}\text{s}^{-1}$$

**P2: Tyr(NO<sub>2</sub>),**  
**P1: nLeu(o-Bzl)**

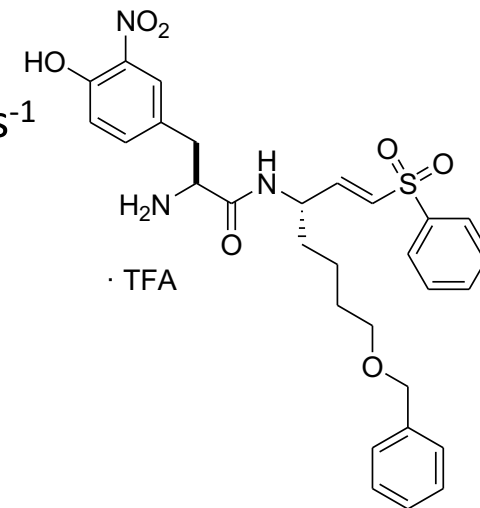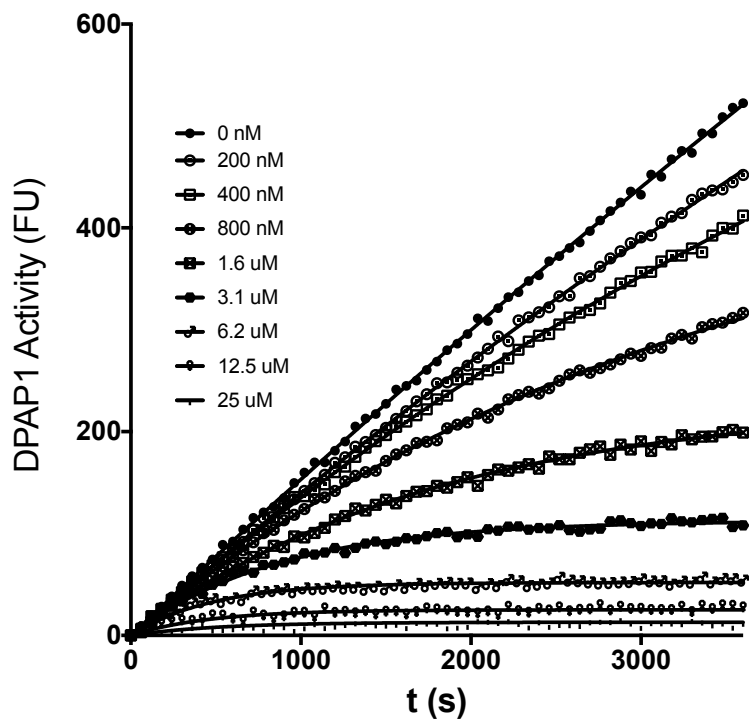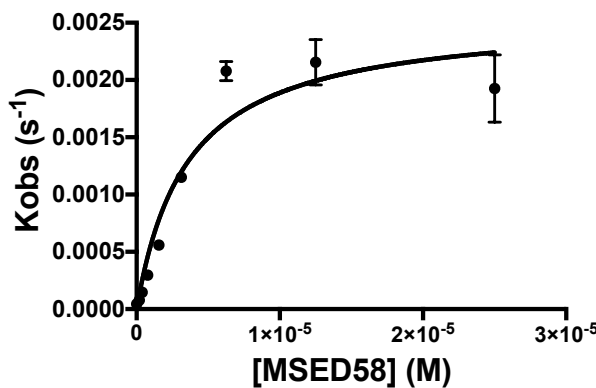

$$k_{\text{inact}} = 0.0026 \pm 0.0003 \text{ s}^{-1}$$

$$K_i = 2.4 \pm 0.9 \text{ uM}$$

$$K_{\text{inact}}/K_i = 1100 \pm 300 \text{ M}^{-1}\text{s}^{-1}$$

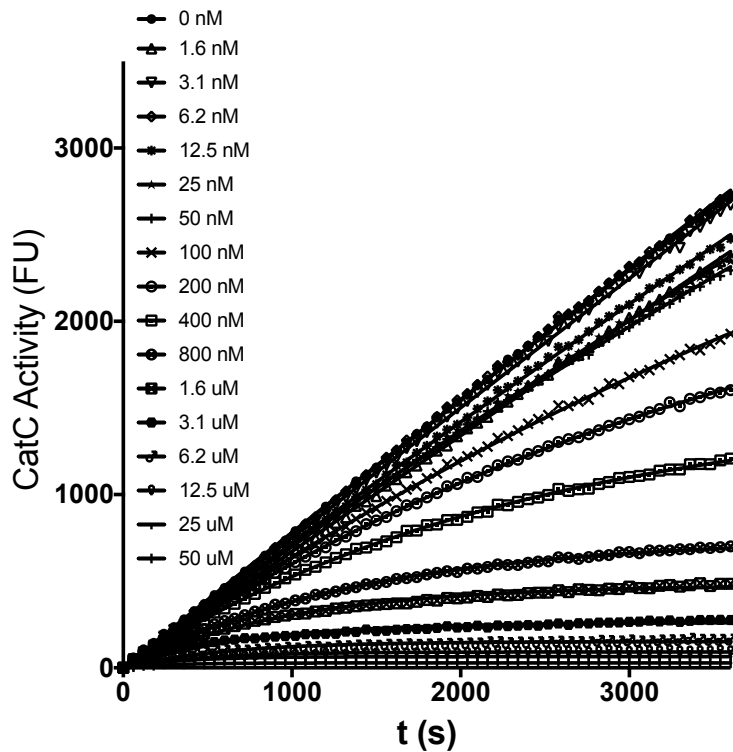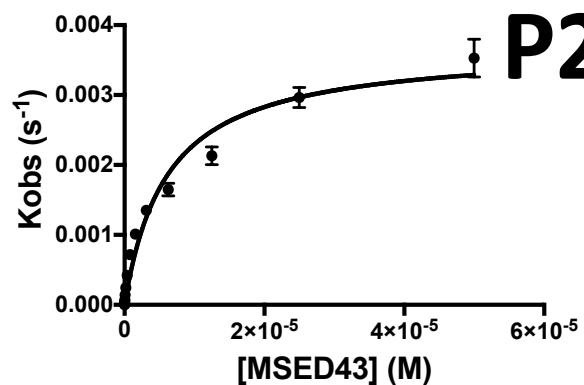

$$k_{inact} = 0.0037 \pm 0.0002 s^{-1}$$

$$K_i = 4.0 \pm 0.7 \mu M$$

$$K_{inact}/K_i = 900 \pm 100 M^{-1}s^{-1}$$

**P2: NaI, P1: hPhe**

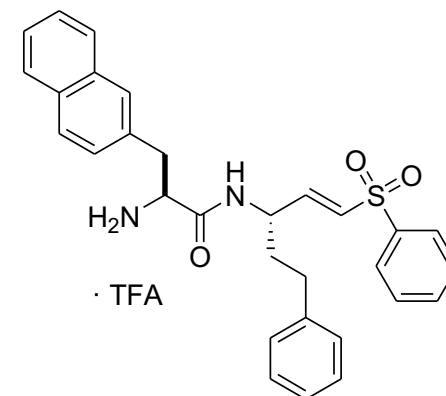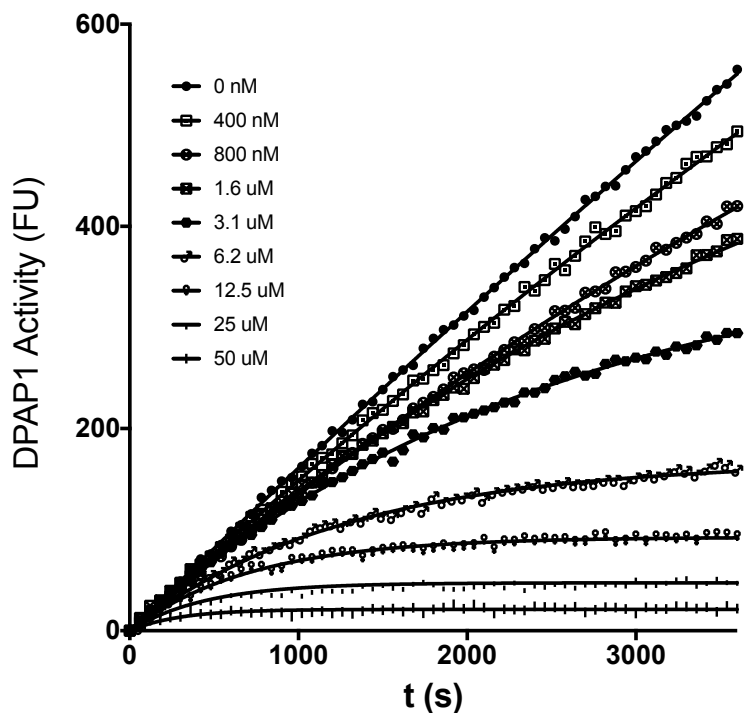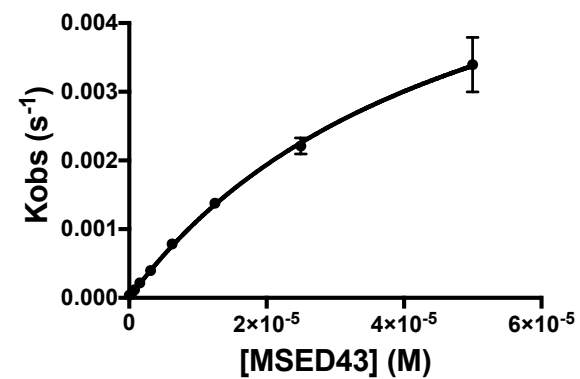

$$k_{inact} = 0.0067 \pm 0.0002 s^{-1}$$

$$K_i = 33 \pm 2 \mu M$$

$$K_{inact}/K_i = 200 \pm 5 M^{-1}s^{-1}$$

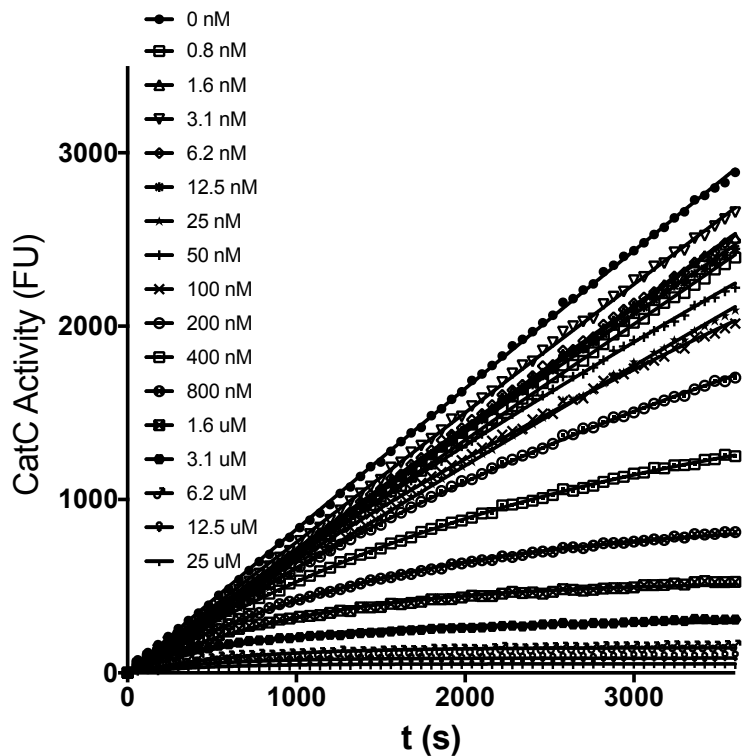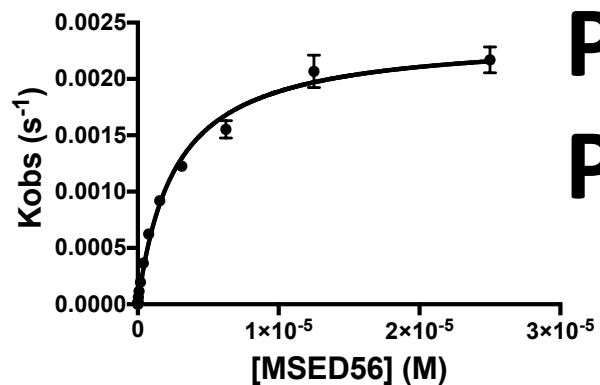

**P2: NaI,**  
**P1: nLeu(o-Bzl)**

$$\begin{aligned}
 k_{\text{inact}} &= 0.0024 \pm 0.0006 \text{ s}^{-1} \\
 K_i &= 1.74 \pm 0.15 \text{ uM} \\
 K_{\text{inact}}/K_i &= 1370 \pm 90 \text{ M}^{-1}\text{s}^{-1}
 \end{aligned}$$

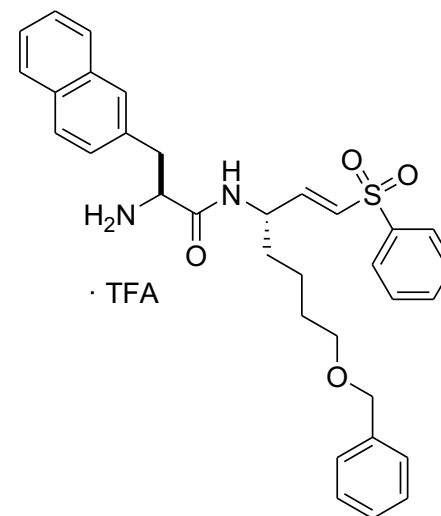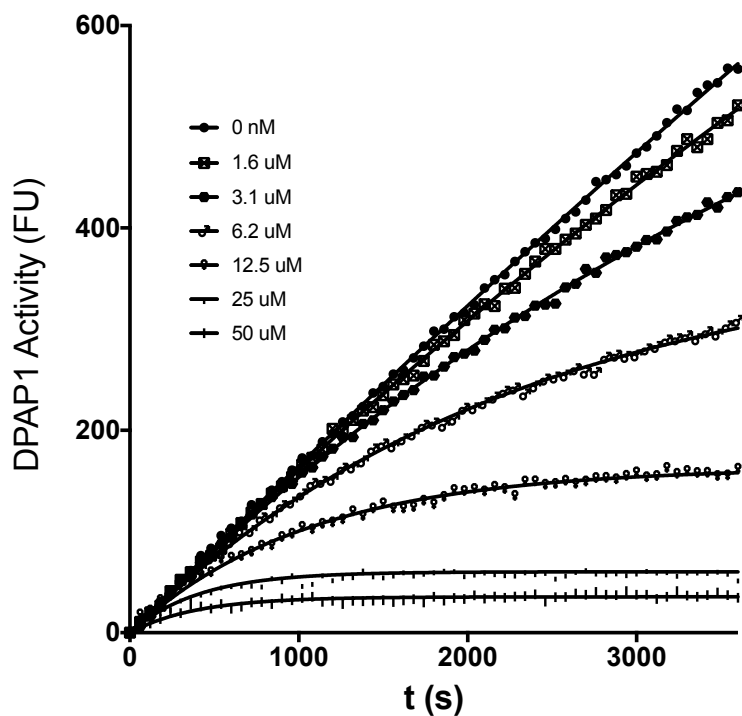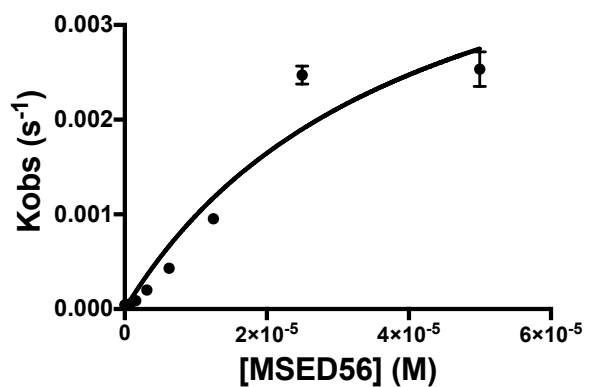

$$\begin{aligned}
 k_{\text{inact}} &= 0.005 \pm 0.002 \text{ s}^{-1} \\
 K_i &= 27 \pm 16 \text{ uM} \\
 K_{\text{inact}}/K_i &= 190 \pm 50 \text{ M}^{-1}\text{s}^{-1}
 \end{aligned}$$



# P2: Igl, P1: hPhe

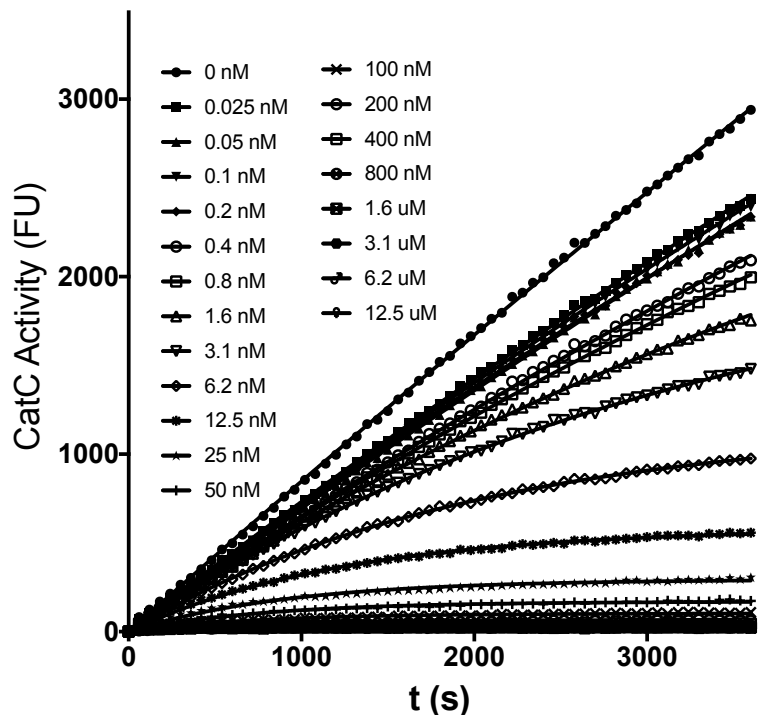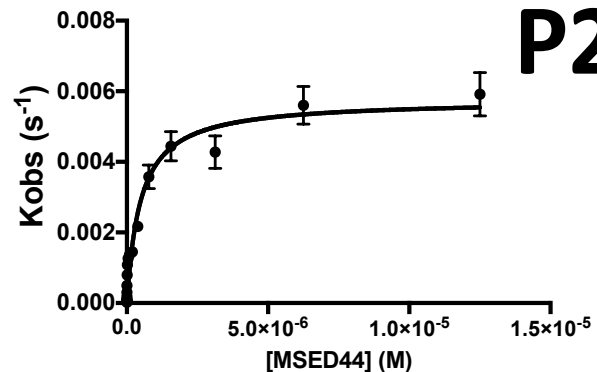

$$k_{inact} = 0.0058 \pm 0.0003 \text{ s}^{-1}$$

$$K_i = 0.32 \pm 0.07 \text{ uM}$$

$$K_{inact}/K_i = 18000 \pm 300 \text{ M}^{-1}\text{s}^{-1}$$

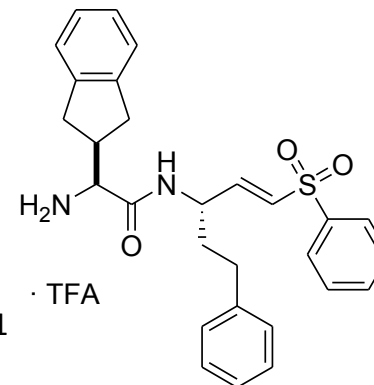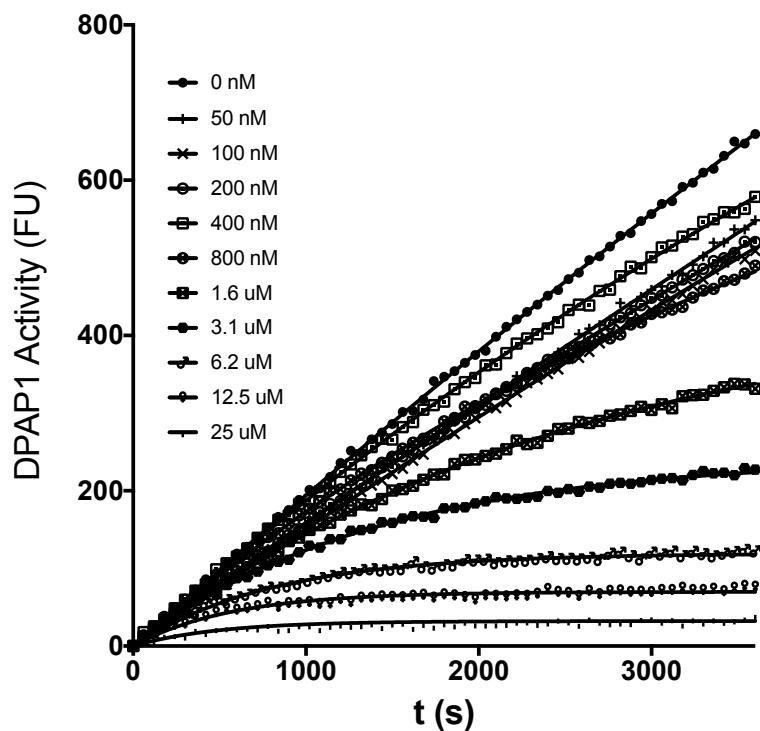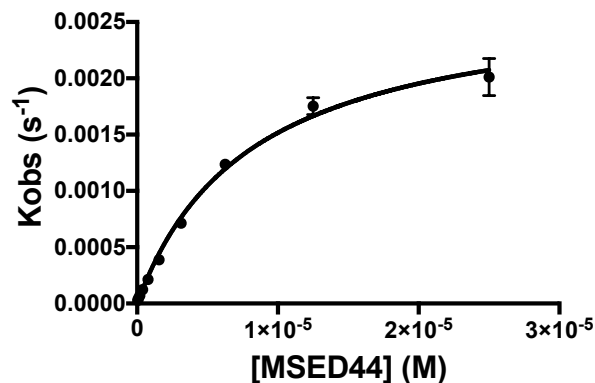

$$k_{inact} = 0.0027 \pm 0.0001 \text{ s}^{-1}$$

$$K_i = 5.4 \pm 0.5 \text{ uM}$$

$$K_{inact}/K_i = 500 \pm 30 \text{ M}^{-1}\text{s}^{-1}$$

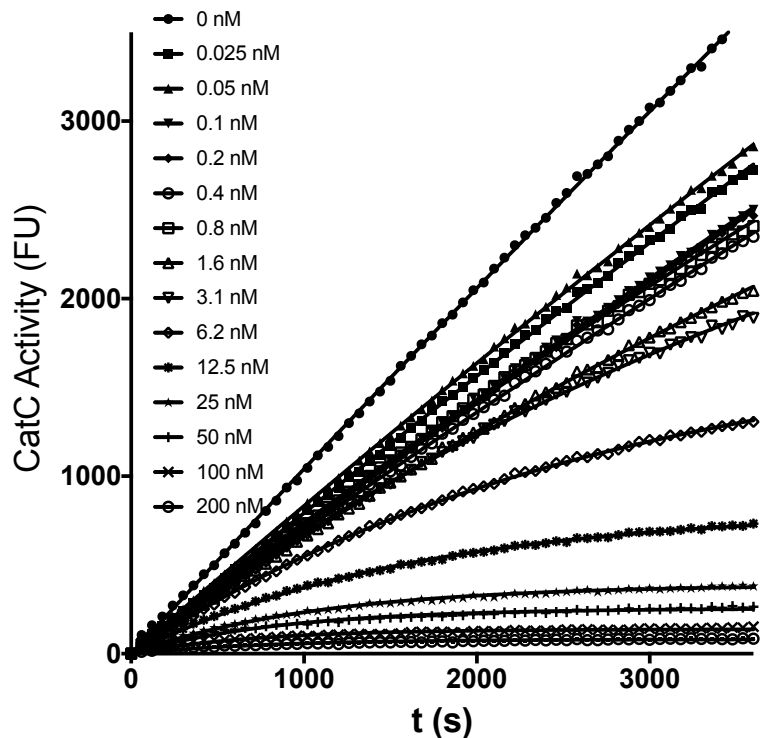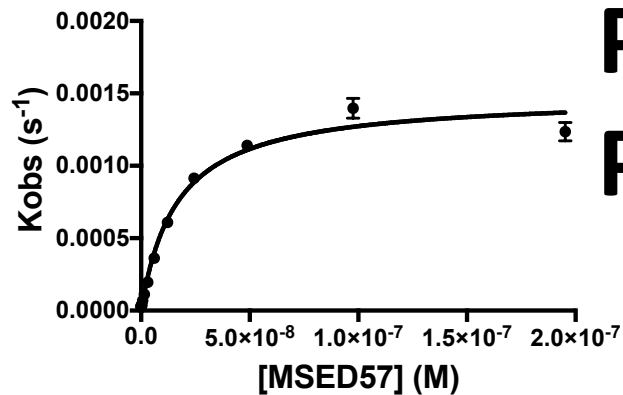

$$k_{inact} = 0.00148 \pm 0.00006 \text{ s}^{-1}$$

$$K_i = 0.011 \pm 0.002 \text{ uM}$$

$$K_{inact}/K_i = 135000 \pm 14000 \text{ M}^{-1}\text{s}^{-1}$$

**P2: Igl,**  
**P1: nLeu(o-Bzl)**

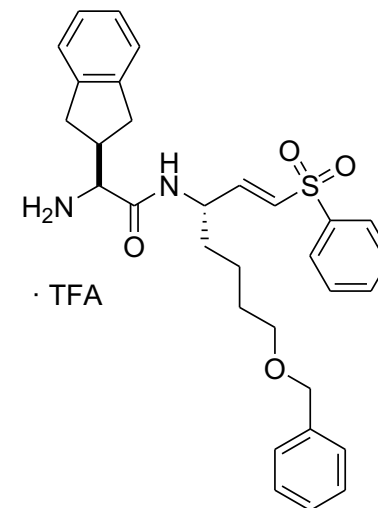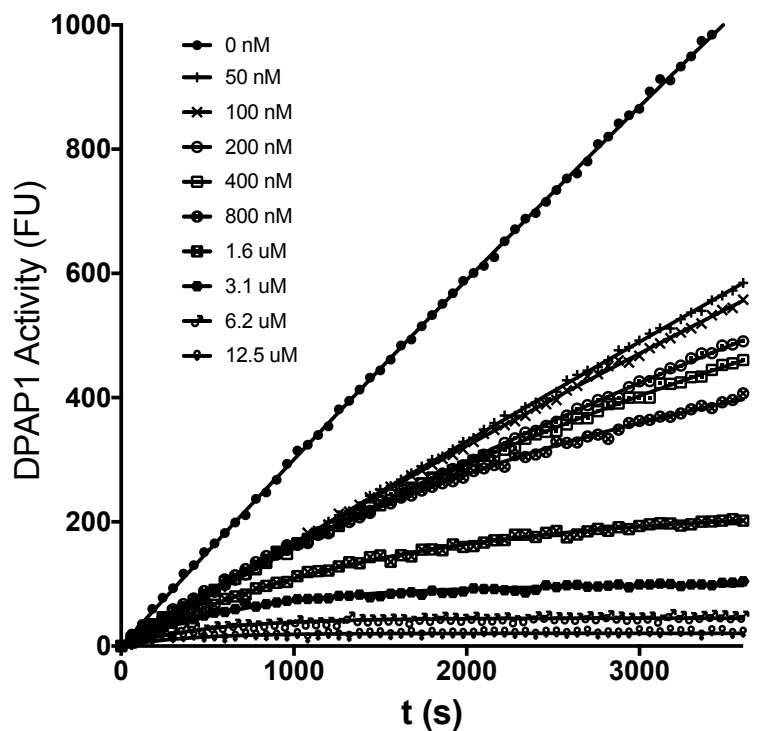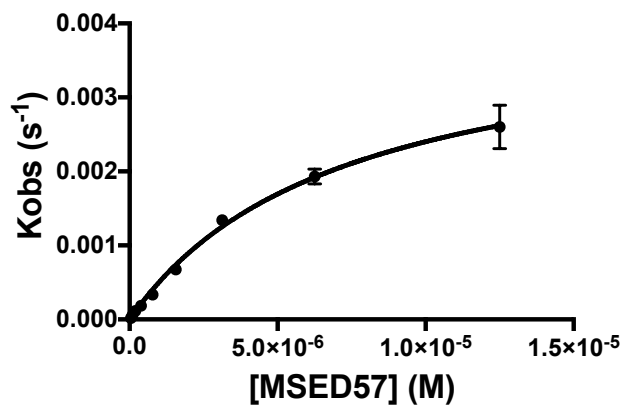

$$k_{inact} = 0.0041 \pm 0.0002 \text{ s}^{-1}$$

$$K_i = 4.8 \pm 0.5 \text{ uM}$$

$$K_{inact}/K_i = 860 \pm 50 \text{ M}^{-1}\text{s}^{-1}$$

# P2: Trp, P1:hPG

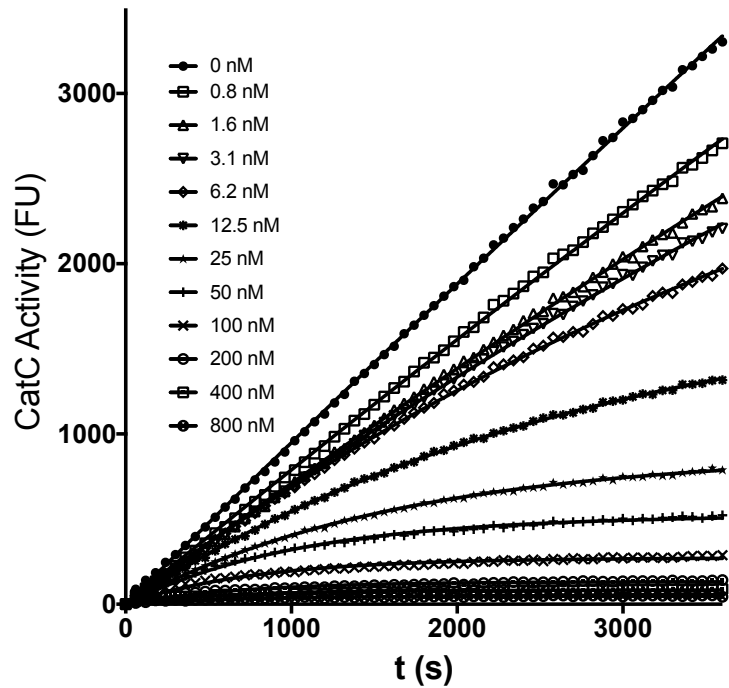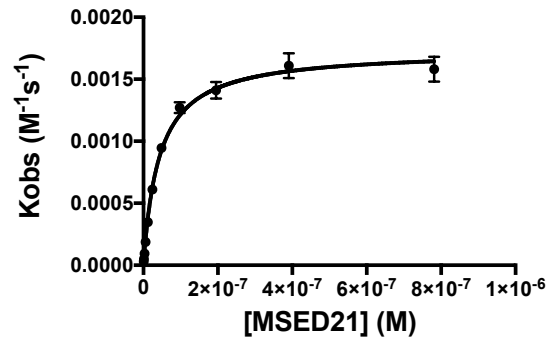

$$k_{inact} = 0.00173 \pm 0.00003 \text{ s}^{-1}$$

$$K_i = 0.028 \pm 0.002 \text{ uM}$$

$$K_{inact}/K_i = 61000 \pm 4000 \text{ M}^{-1}\text{s}^{-1}$$

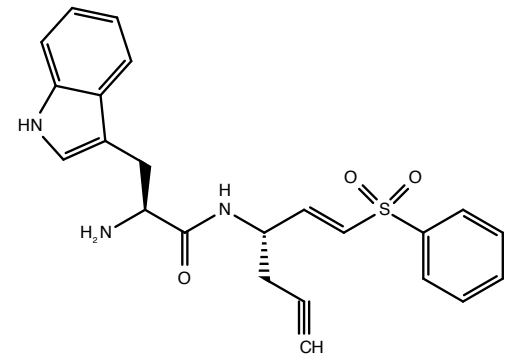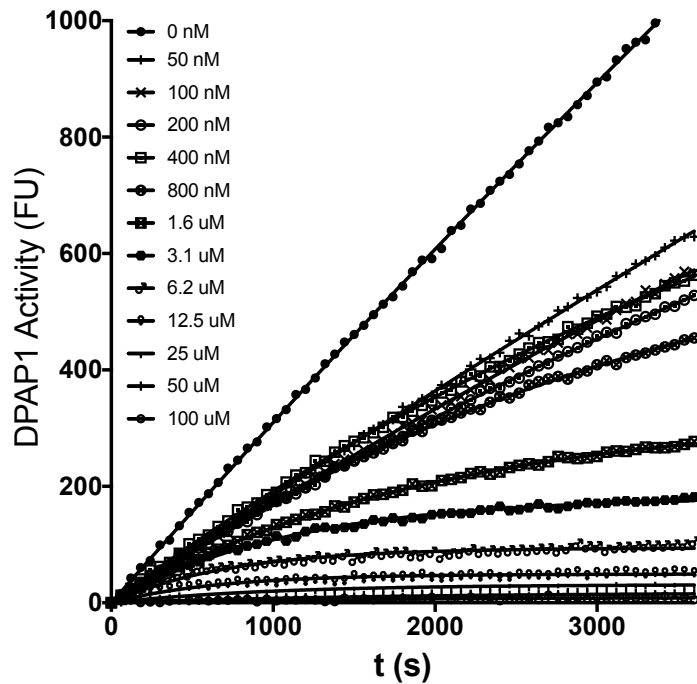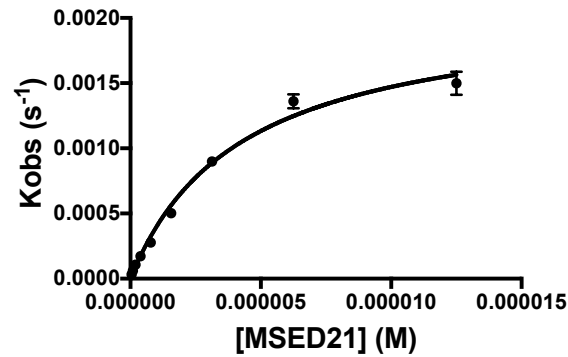

$$k_{inact} = 0.0021 \pm 0.0002 \text{ s}^{-1}$$

$$K_i = 2.8 \pm 0.45 \text{ uM}$$

$$K_{inact}/K_i = 740 \pm 70 \text{ M}^{-1}\text{s}^{-1}$$

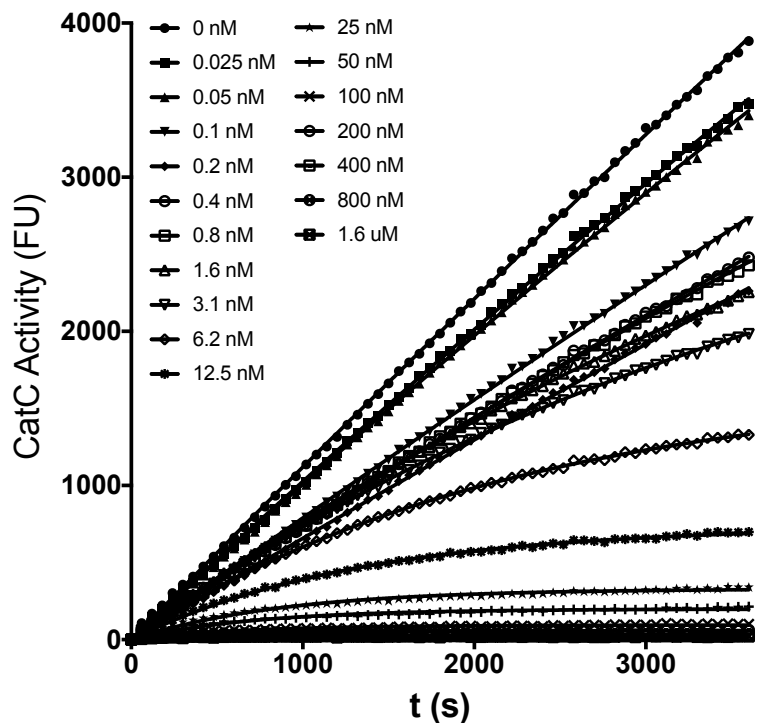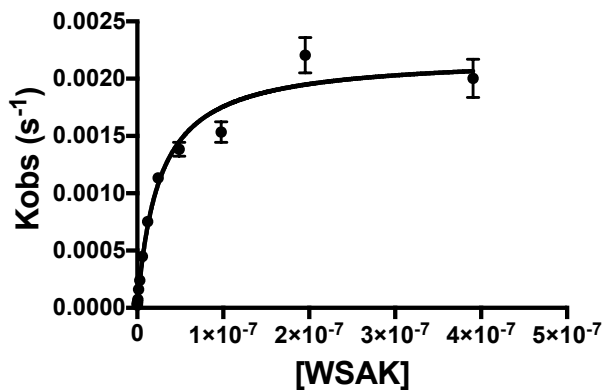

$$k_{inact} = 0.0022 \pm 0.00009 \text{ s}^{-1}$$

$$K_i = 0.016 \pm 0.003 \text{ uM}$$

$$K_{inact}/K_i = 131000 \pm 15000 \text{ M}^{-1}\text{s}^{-1}$$

## P2: L-Trp, P1: hPhe

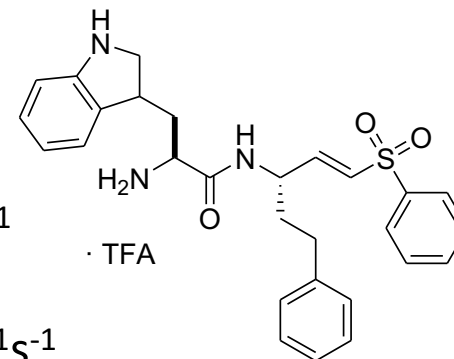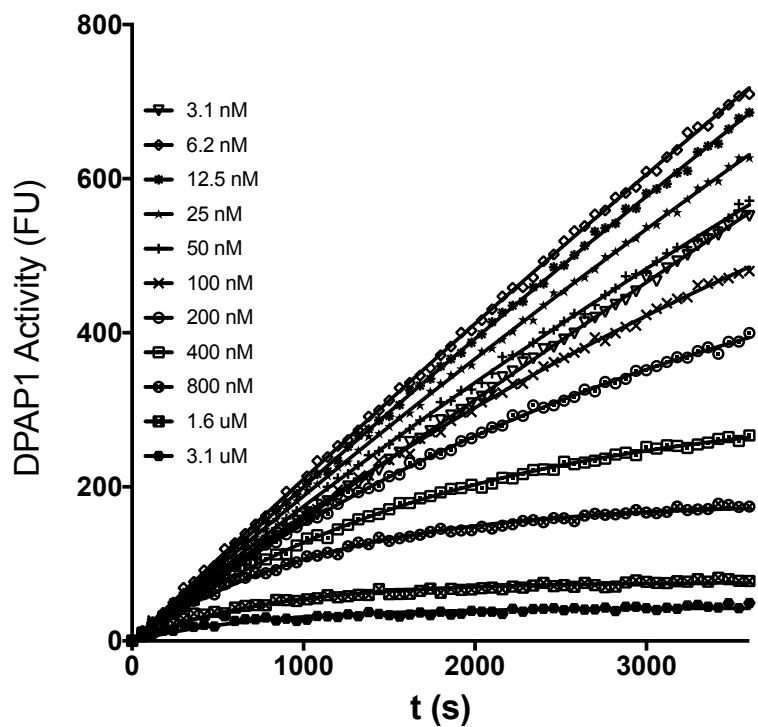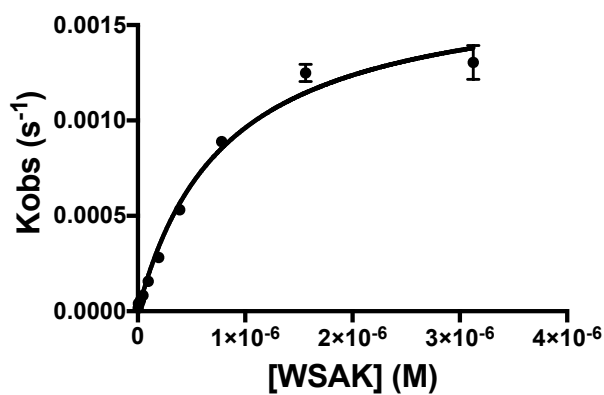

$$k_{inact} = 0.0017 \pm 0.0001 \text{ s}^{-1}$$

$$K_i = 0.54 \pm 0.08 \text{ uM}$$

$$K_{inact}/K_i = 3200 \pm 300 \text{ M}^{-1}\text{s}^{-1}$$

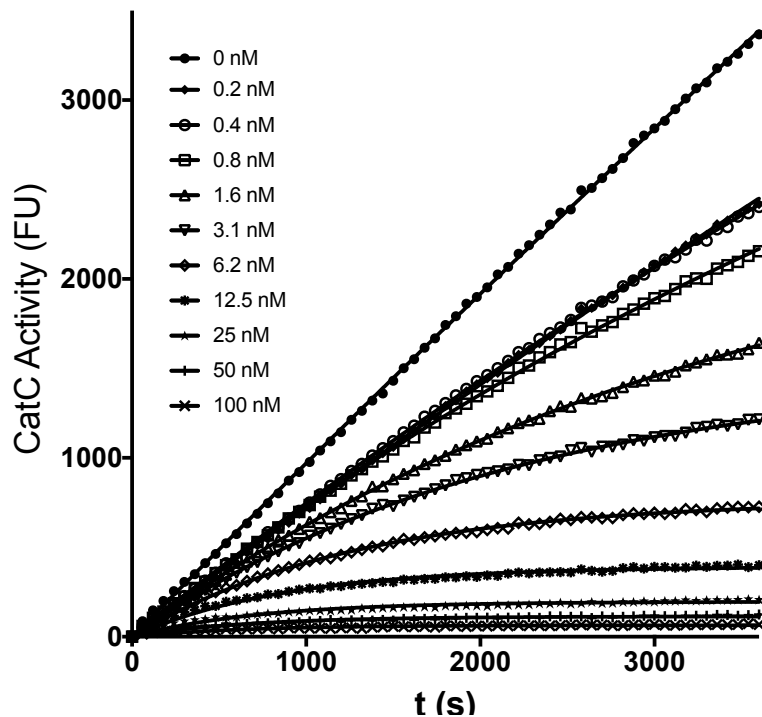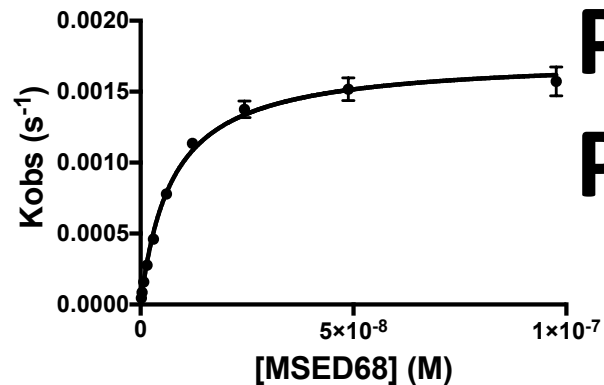

**P2: L-Trp,**  
**P1: nLeu(o-Bzl)**

$k_{inact} = 0.0022 \pm 0.00009 s^{-1}$   
 $K_i = 0.016 \pm 0.003 \mu M$   
 $K_{inact}/K_i = 131000 \pm 15000 M^{-1}s^{-1}$

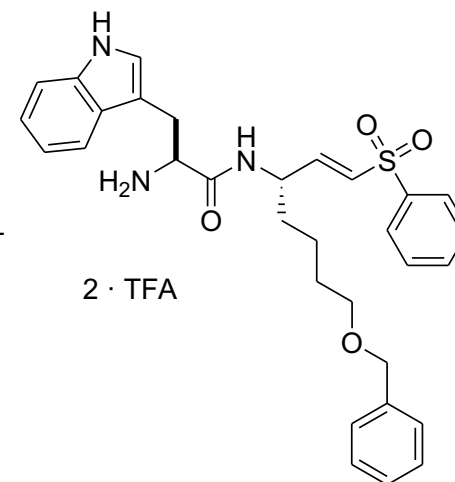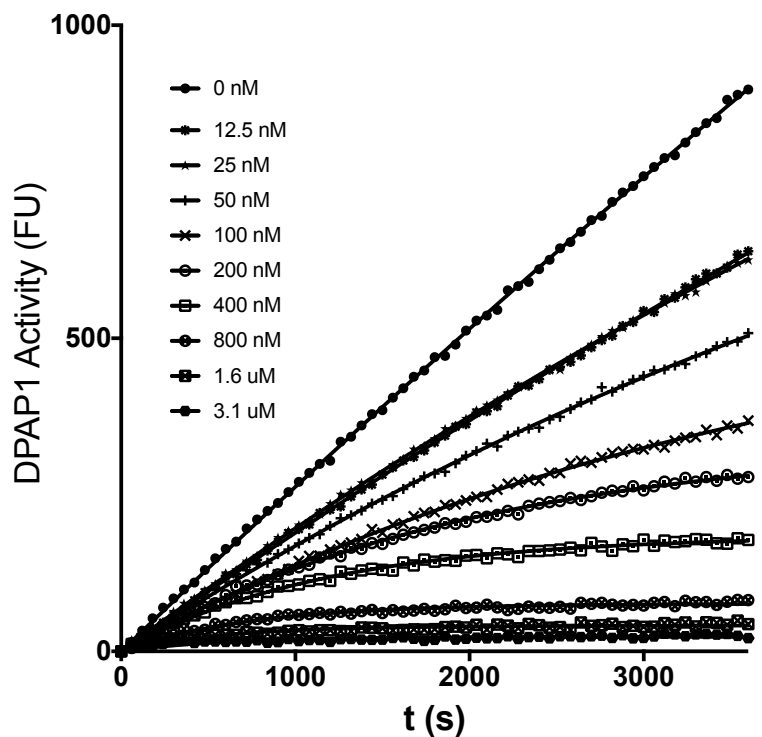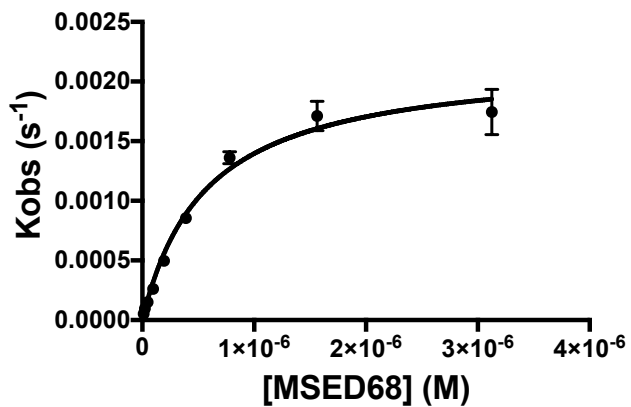

$k_{inact} = 0.0017 \pm 0.0001 s^{-1}$   
 $K_i = 0.54 \pm 0.08 \mu M$   
 $K_{inact}/K_i = 3200 \pm 300 M^{-1}s^{-1}$

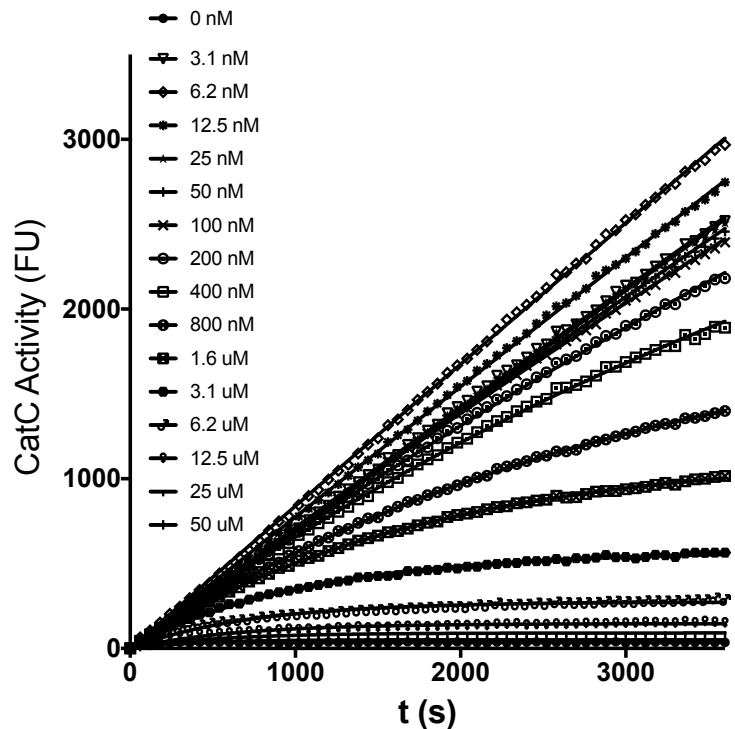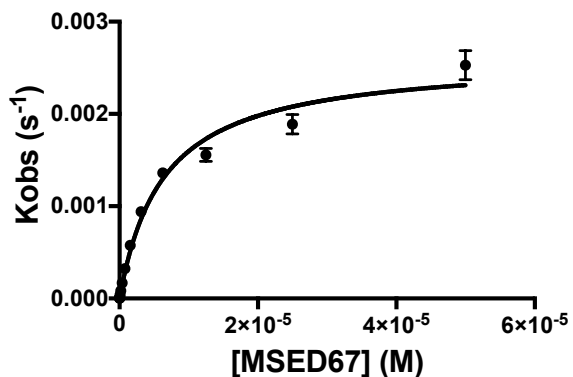

$$k_{\text{inact}} = 0.0026 \pm 0.0001 \text{ s}^{-1}$$

$$K_i = 4.2 \pm 0.6 \text{ uM}$$

$$K_{\text{inact}}/K_i = 620 \pm 70 \text{ M}^{-1}\text{s}^{-1}$$

**P2: D-Trp,  
P1: hPhe**

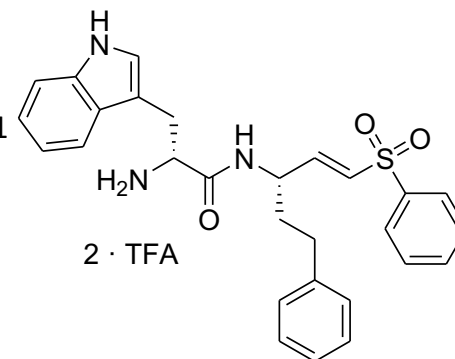

MSED67 Kobs

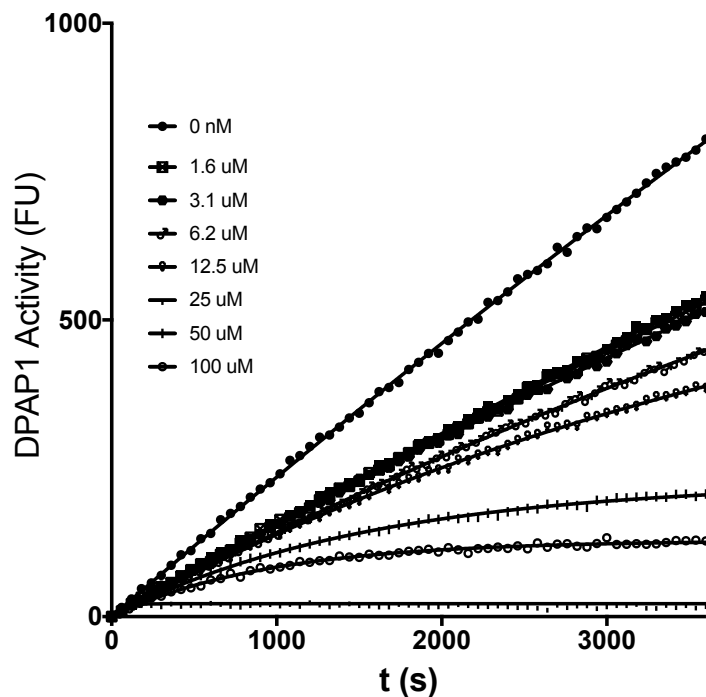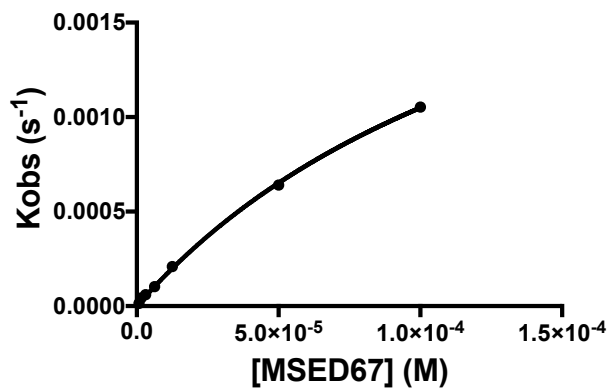

$$k_{\text{inact}} = 0.0027 \pm 0.0002 \text{ s}^{-1}$$

$$K_i = 105 \pm 10 \text{ uM}$$

$$K_{\text{inact}}/K_i = 26 \pm 1 \text{ M}^{-1}\text{s}^{-1}$$

# P2: *D*-Trp, P1: nLeu(o-Bzl)

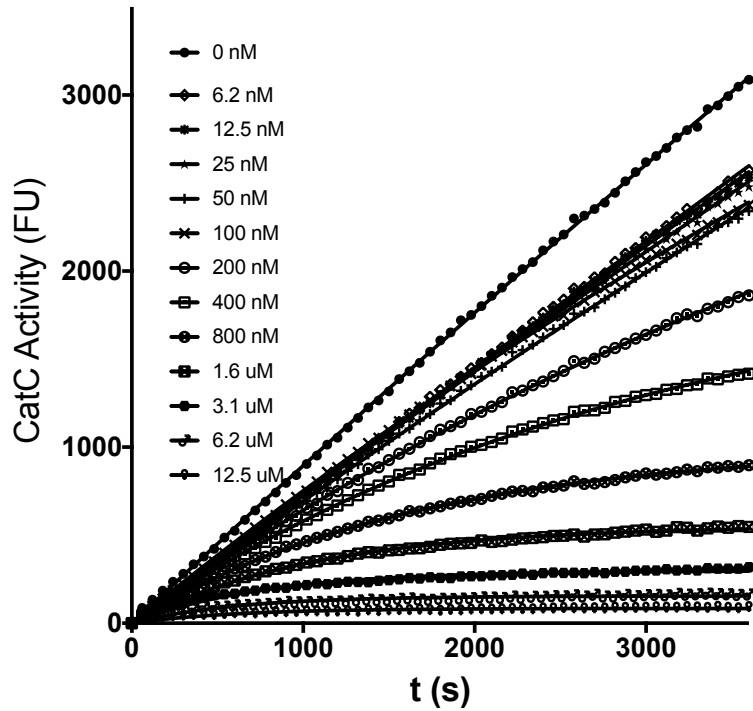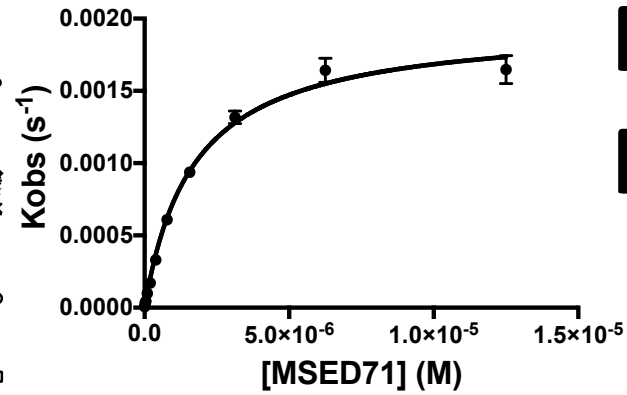

$$k_{inact} = 0.00197 \pm 0.00006 \text{ s}^{-1}$$

$$K_i = 1.1 \pm 0.1 \text{ uM}$$

$$K_{inact}/K_i = 1700 \pm 100 \text{ M}^{-1}\text{s}^{-1}$$

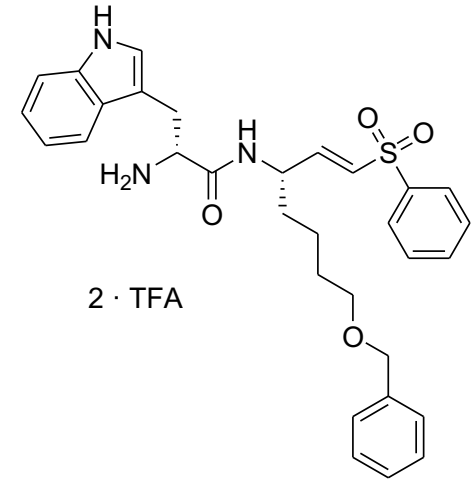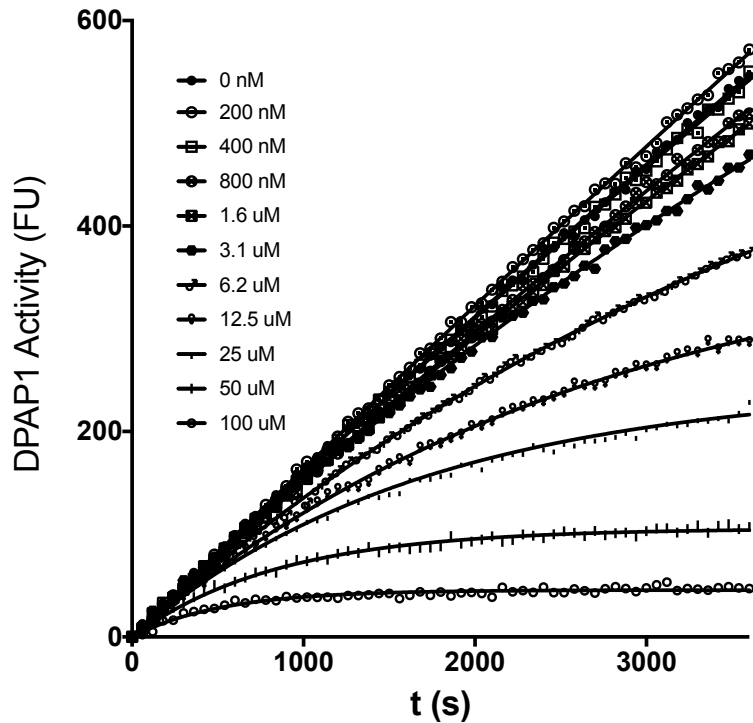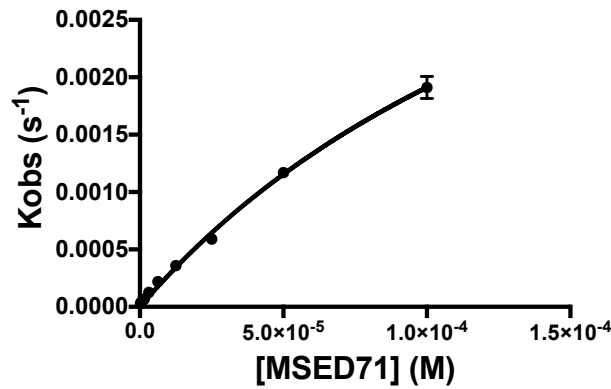

$$k_{inact} = 0.0055 \pm 0.0007 \text{ s}^{-1}$$

$$K_i = 127 \pm 20 \text{ uM}$$

$$K_{inact}/K_i = 44 \pm 2 \text{ M}^{-1}\text{s}^{-1}$$

Fig. S4

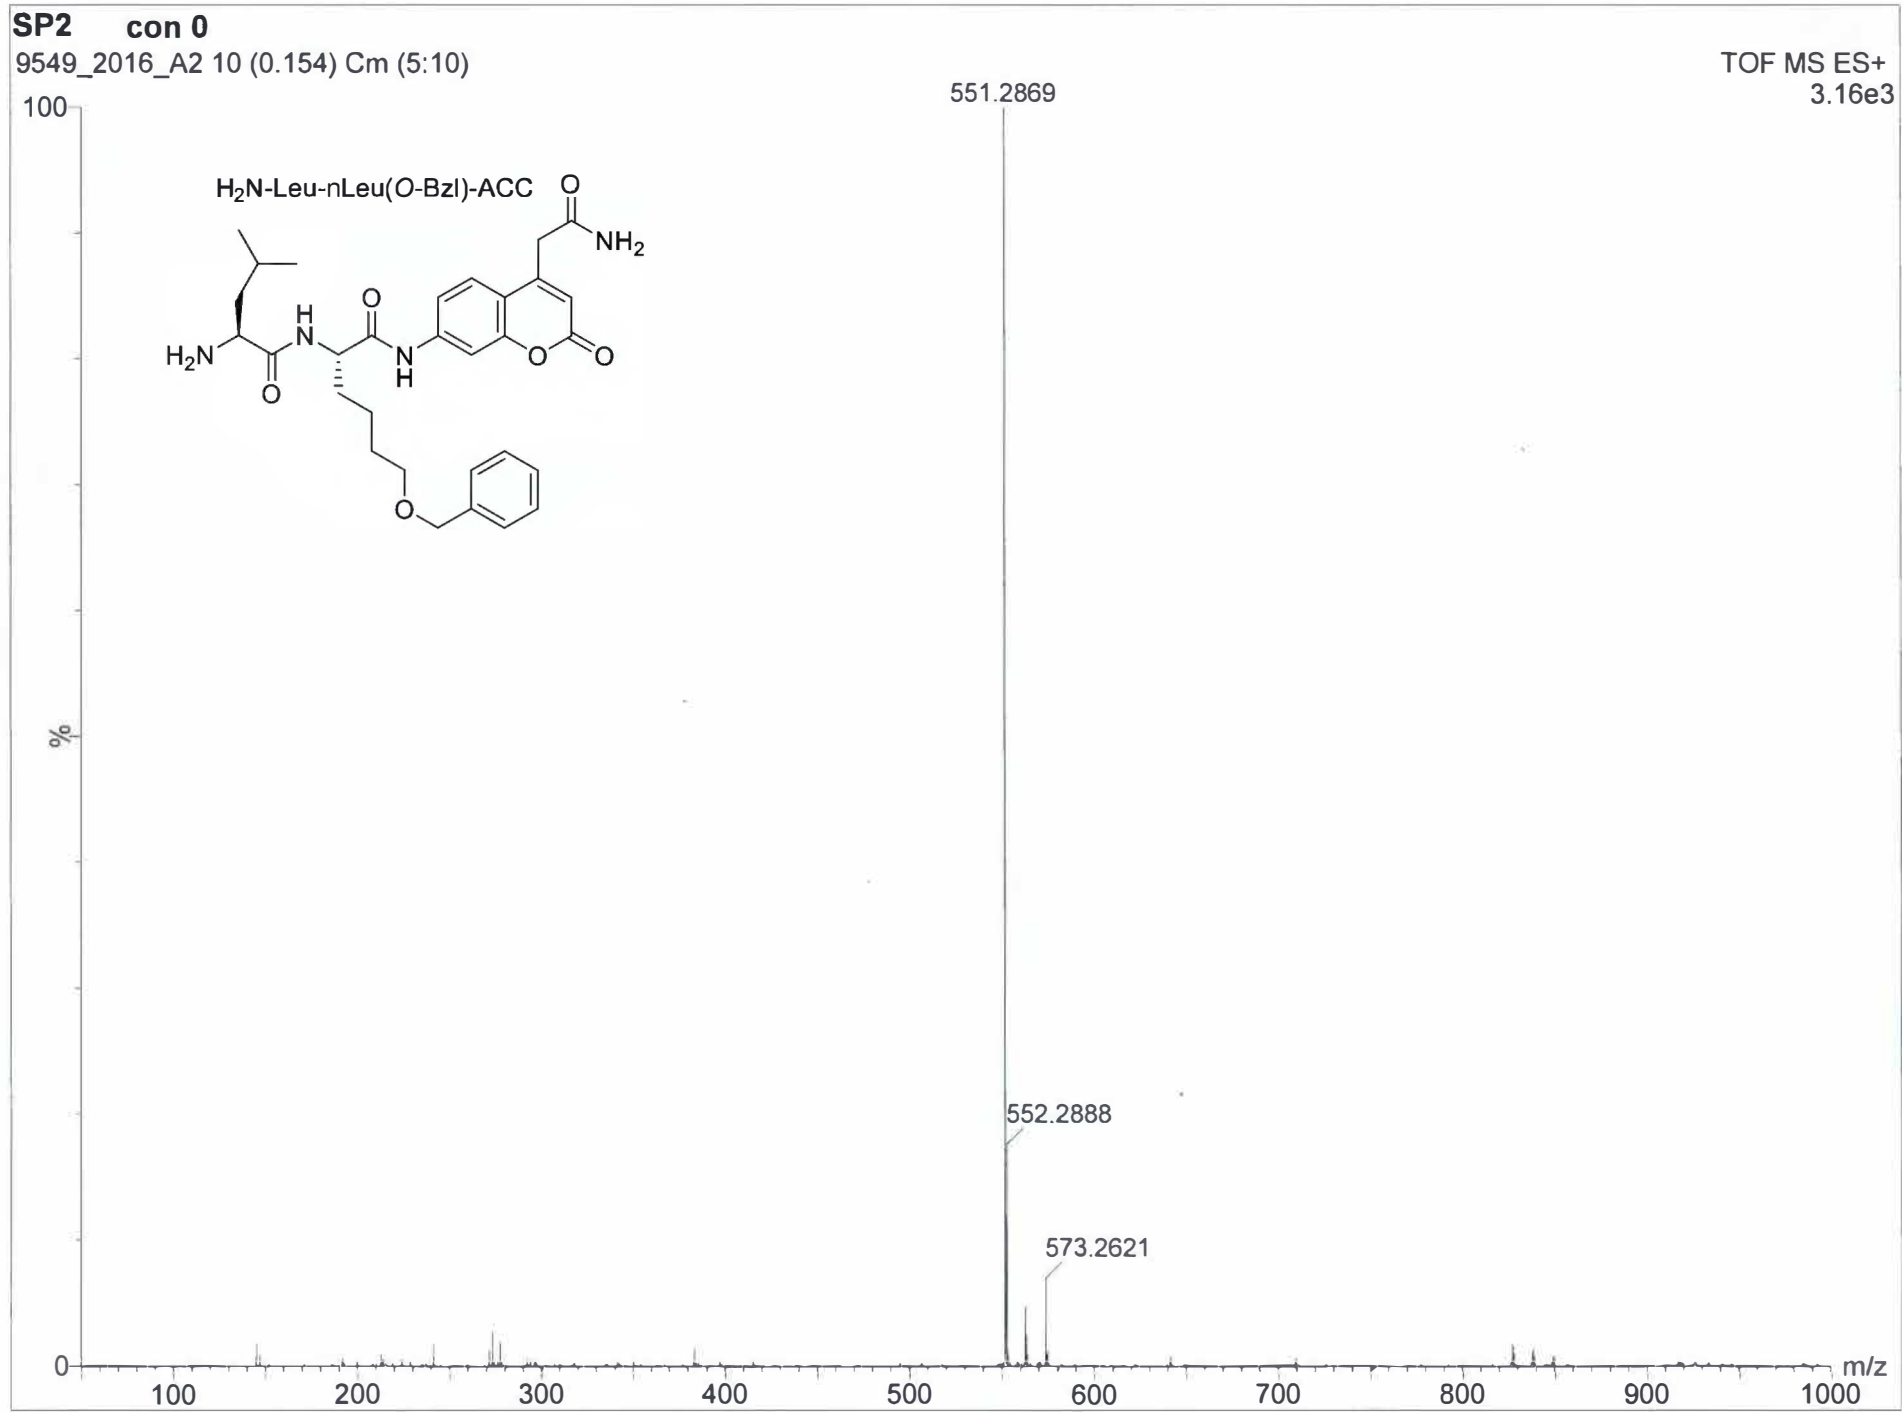



SP5 con 0

9552\_2016\_A2 7 (0.102) Cm (5:9)

TOF MS ES+  
3.82e3

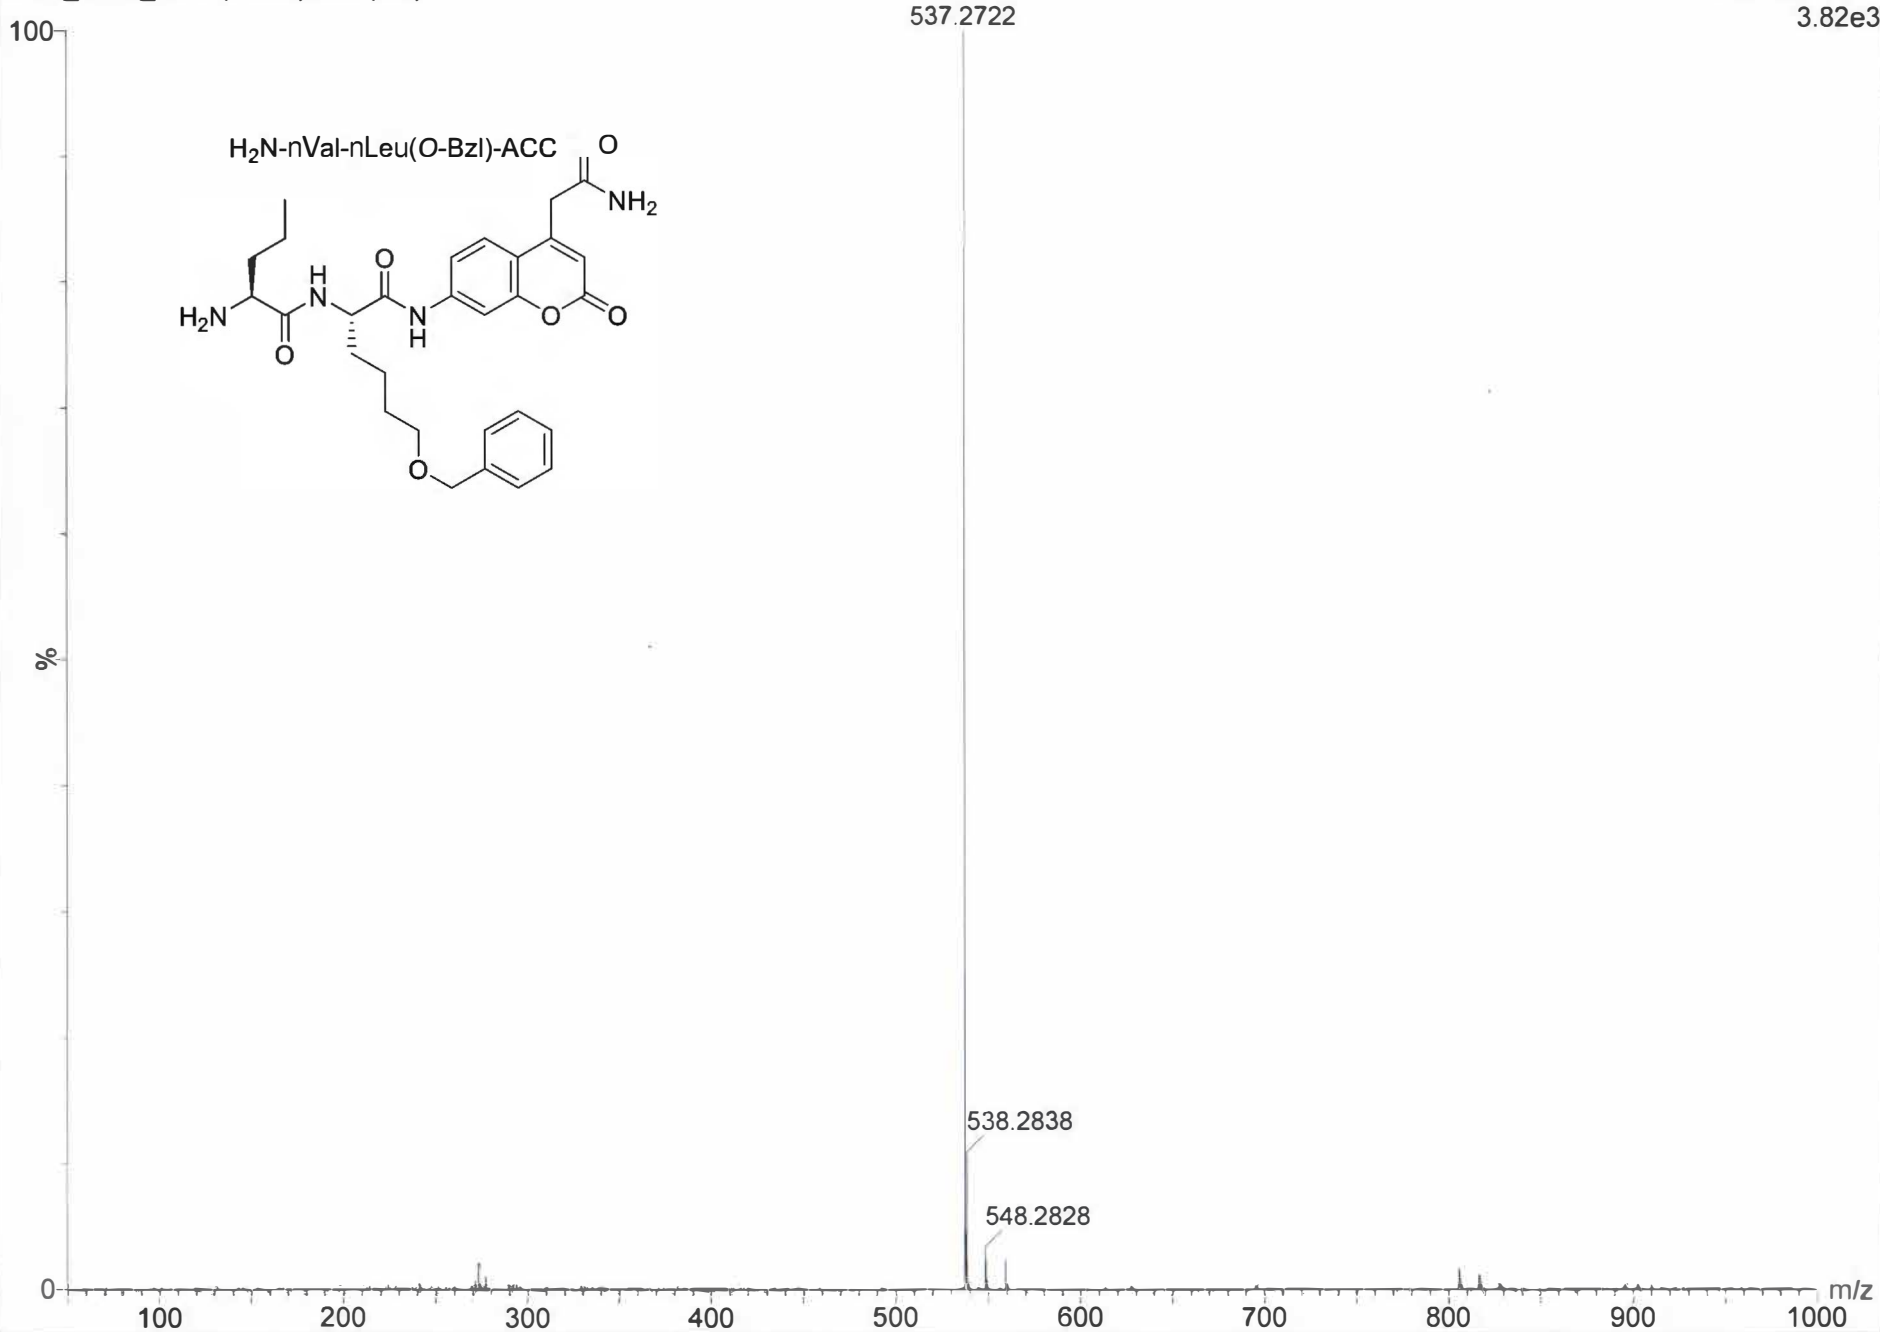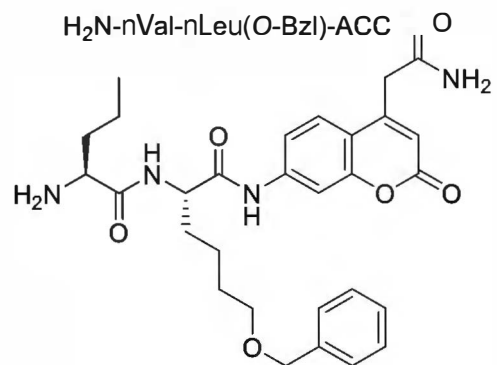

SP7 con 0

9554\_2016\_A2 8 (0.119) Cm (3:10)

TOF MS ES+  
2.08e3

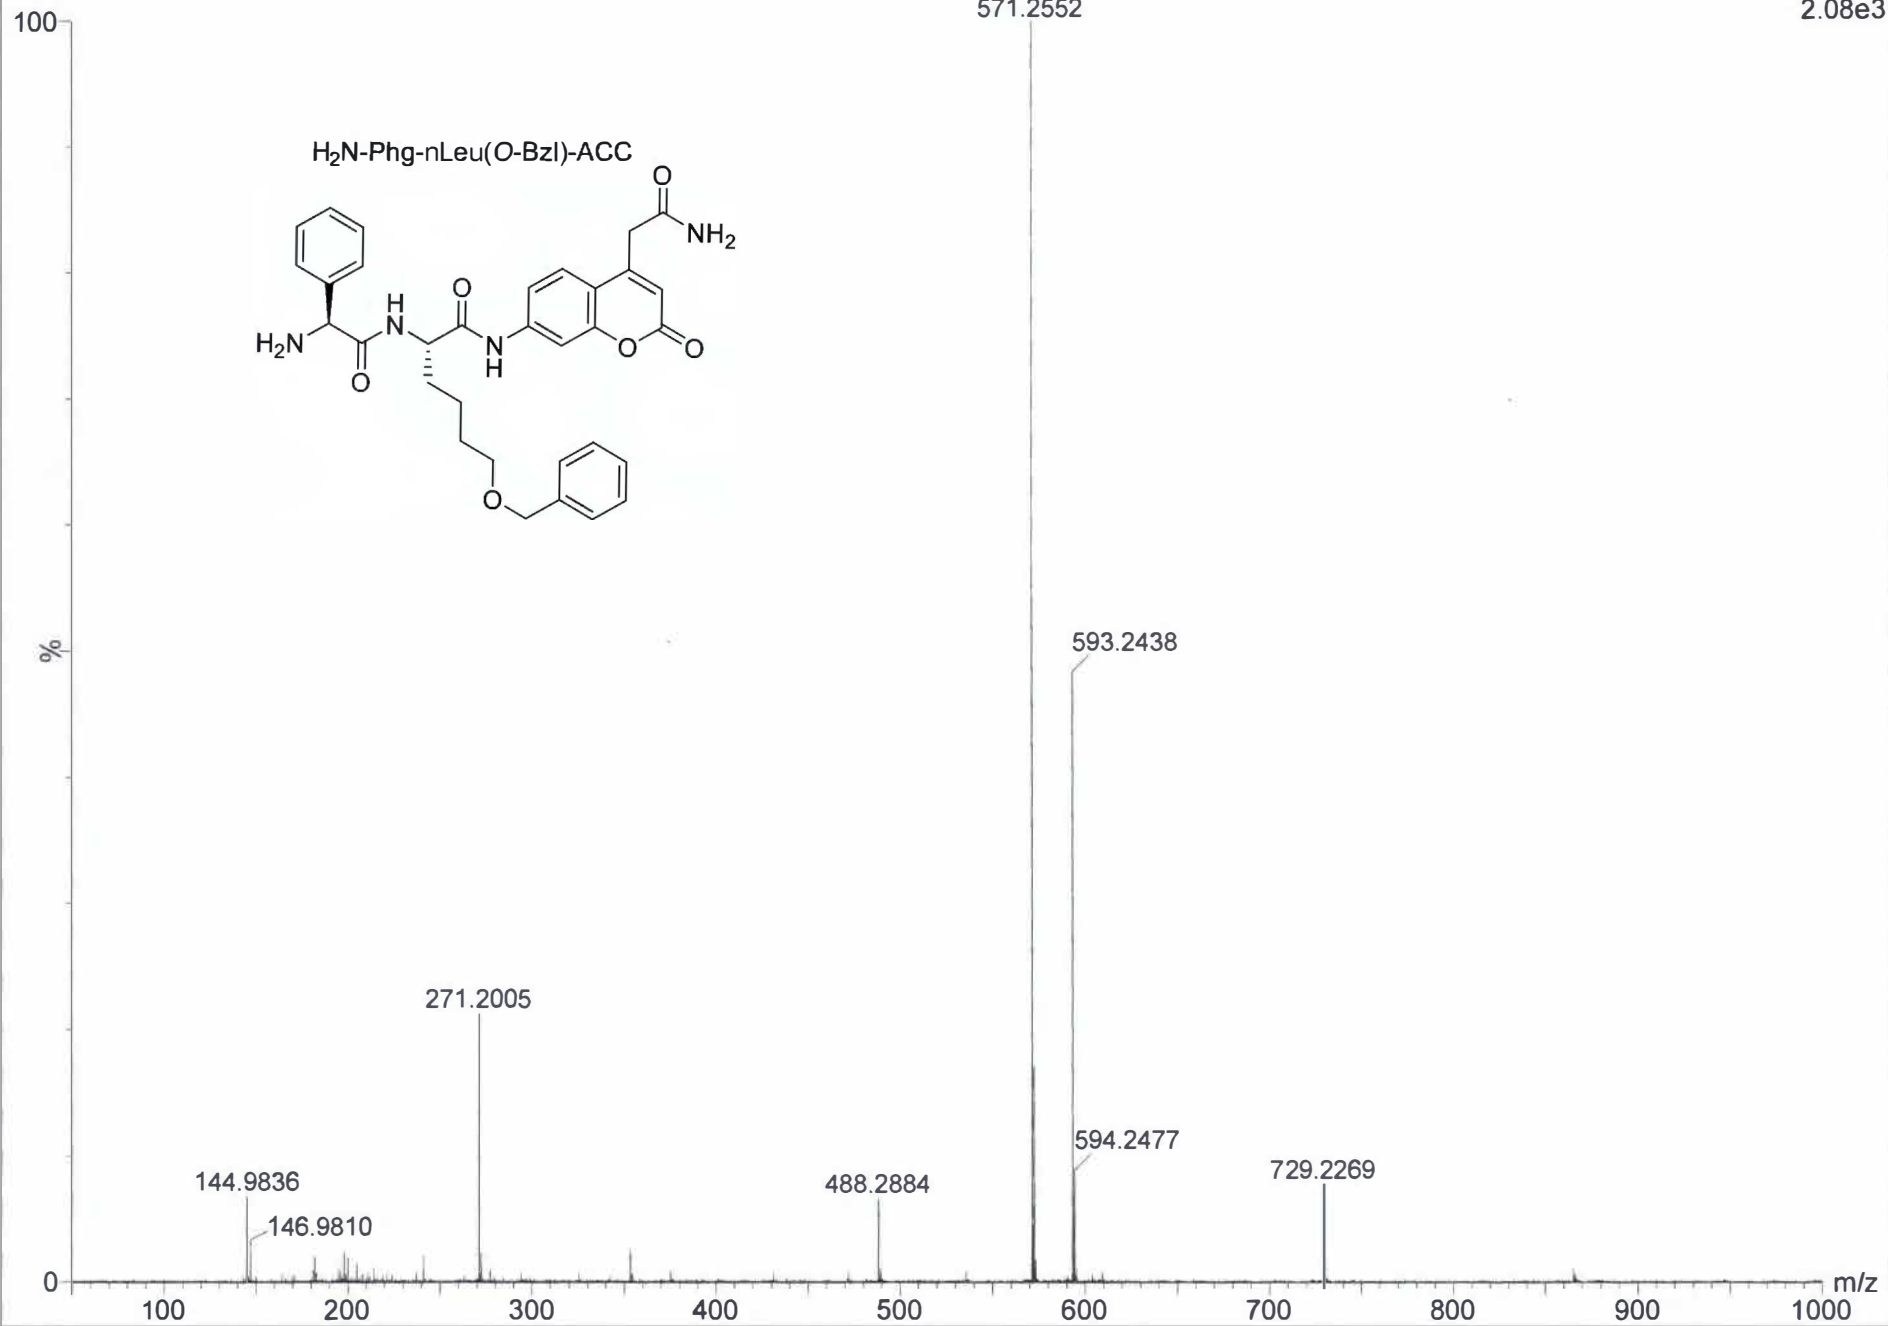

SP4 con 150

11860\_2017\_A2 24 (0.392)

TOF MS ES+  
987

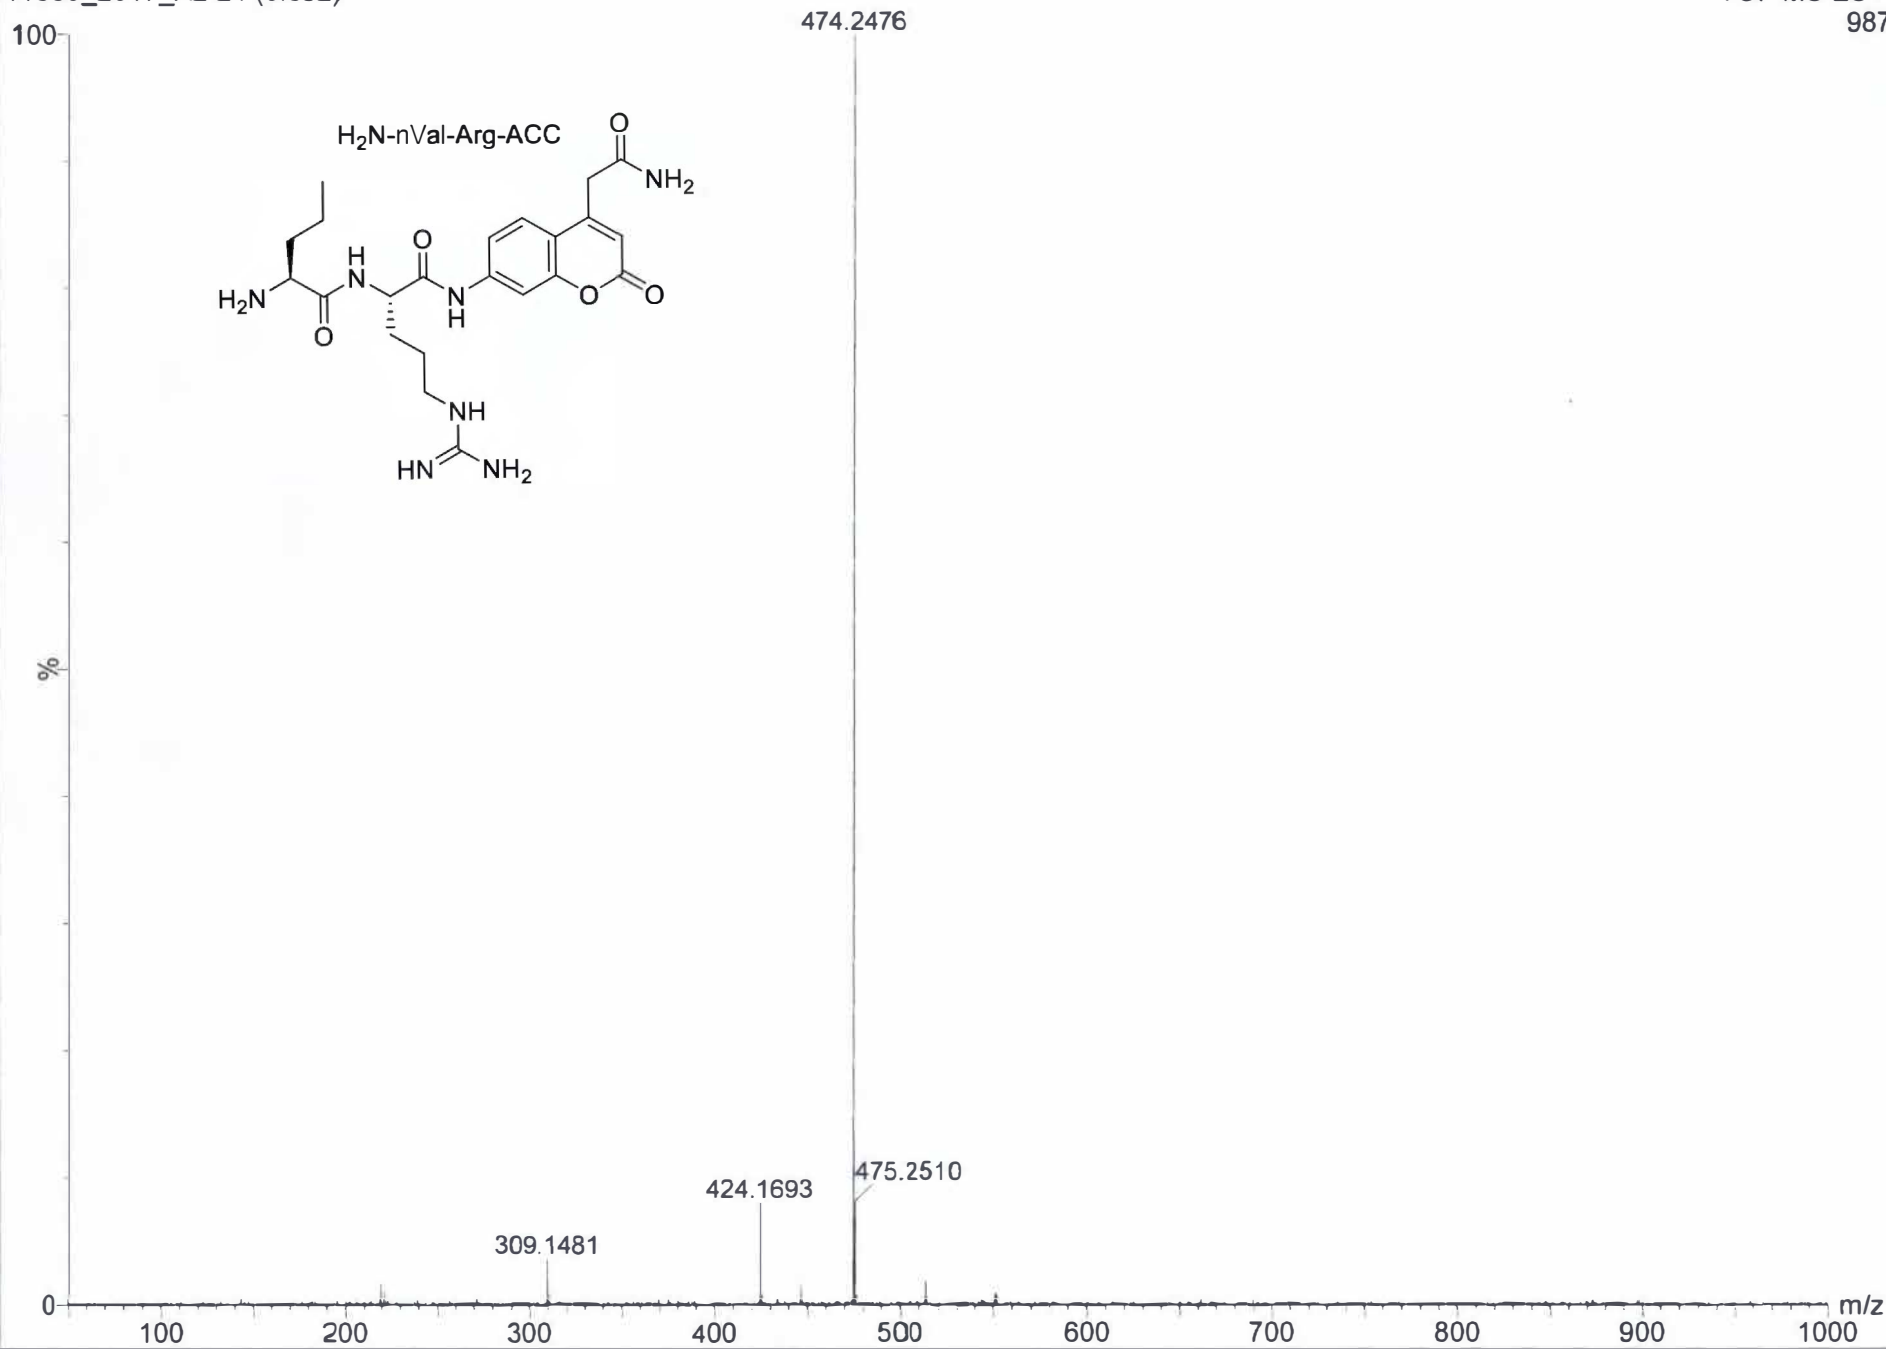

SP6 con 0

9553\_2016\_A2 4 (0.051) Cm (3:6)

TOF MS ES+  
1.51e3

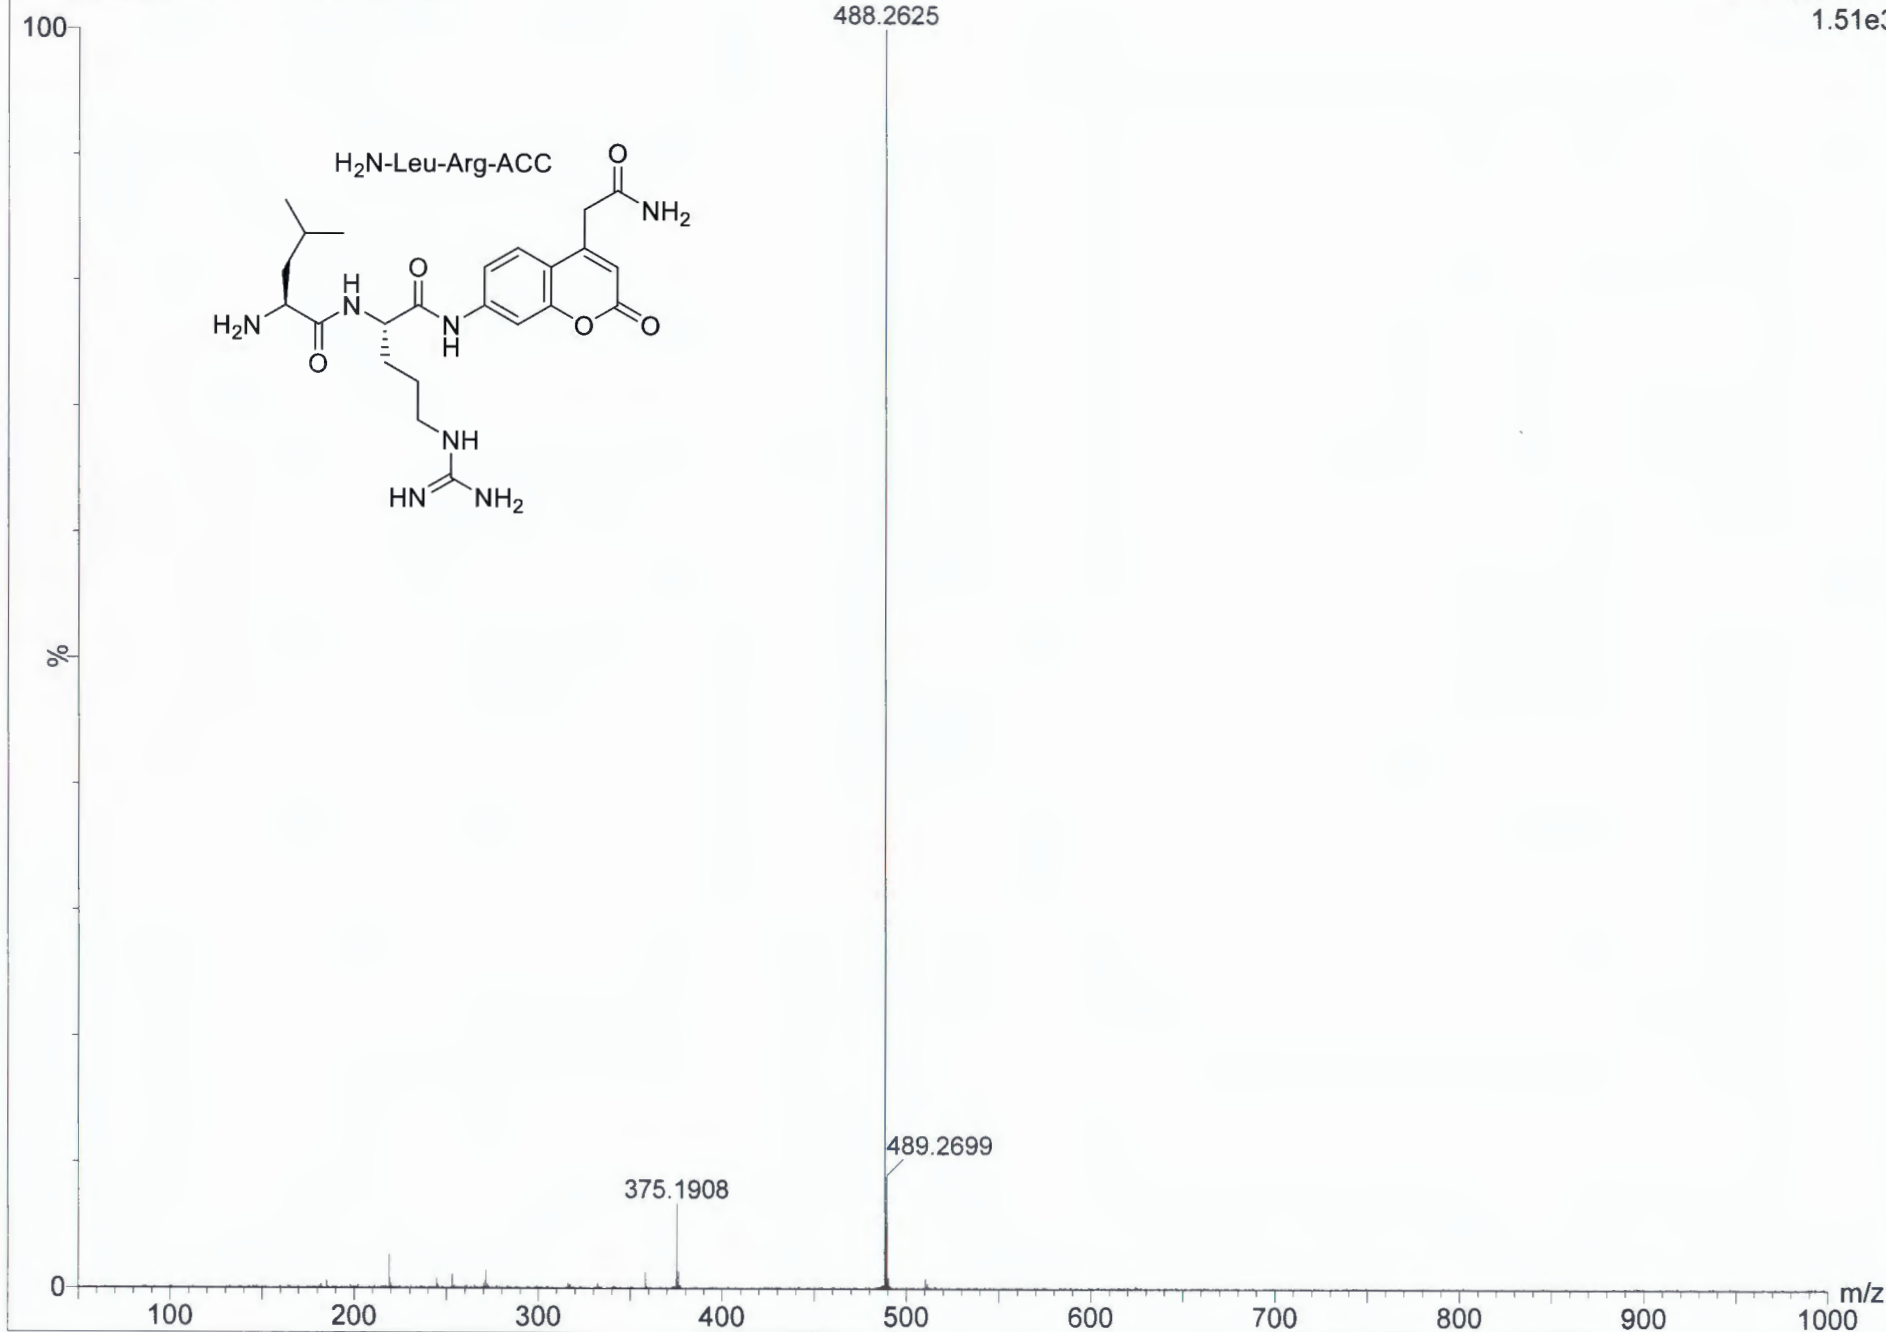

SP3 con 0

9550\_2016\_A3 8 (0.119) Cm (5:8)

TOF MS ES+  
1.87e3

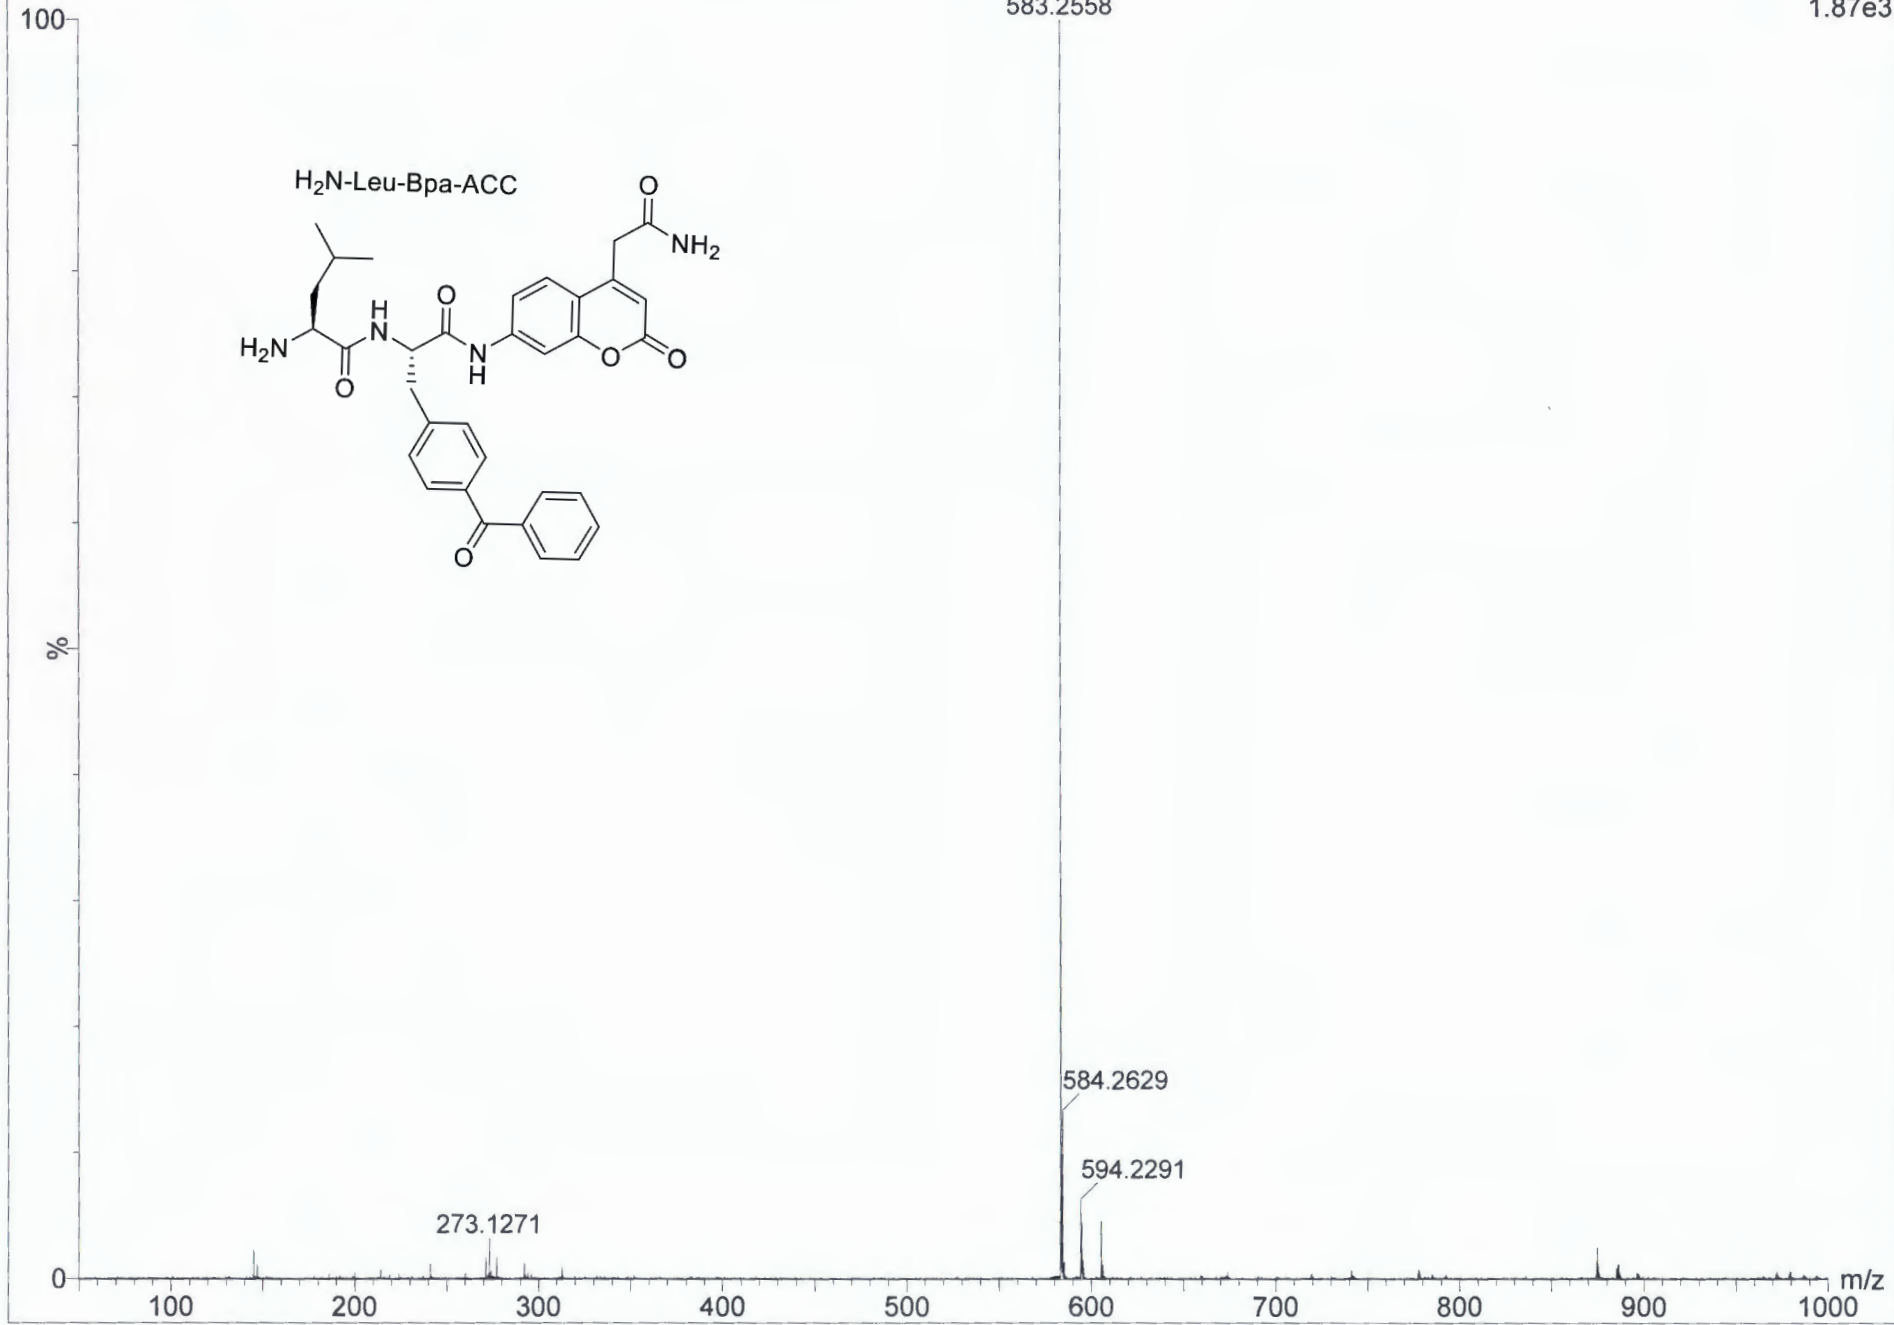

Supplement: Supplementary file [file 246124-1.pdf]
